# Supplementary material for: Synthesis of pyrazolone fused benzodiazepines via Rh(iii)-catalyzed [4 + 3] annulation of 1-phenylpyrazolidinones with propargyl alcohols
Source: Royal Society of Chemistry journal article supplement (doi:10.1039/d0qo00657b), 2020-01-01
Supplement: d0qo00657b1.pdf [file d0qo00657b1.pdf]

## Supporting Information

### Synthesis of Pyrazolone Fused Benzodiazepines via Rh(III)-Catalyzed [4+3] Annulation of 1-Phenylpyrazolidinones with Propargyl Alcohols

Linghua Zhang, Yuanshuang Xu, Xiaopeng Zhang, Xinying Zhang\*, and Xuesen Fan\*

*Henan Key Laboratory of Organic Functional Molecules and Drug Innovation, Key Laboratory of Green Chemical Media and Reactions, Ministry of Education, Collaborative Innovation Center of Henan Province for Green Manufacturing of Fine Chemicals, School of Chemistry and Chemical Engineering, Henan Normal University, Xinxiang, Henan 453007, China*

*E-mail: xinyingzhang@htu.cn; xuesen.fan@htu.cn*

#### Table of Contents

|             |                                                |           |
|-------------|------------------------------------------------|-----------|
| <b>I</b>    | General experimental information               | S2        |
| <b>II</b>   | Experimental procedures and spectroscopic data | S3-S29    |
| <b>III</b>  | Mechanism studies                              | S30-S31   |
| <b>IV</b>   | Copies of NMR spectra of <b>3a-3ee</b>         | S32-S70   |
| <b>V</b>    | Copies of NMR spectra of <b>5a-5m</b>          | S71-S85   |
| <b>VI</b>   | Copies of NMR spectra of <b>7a-7q</b>          | S86-S105  |
| <b>VII</b>  | Copies of NMR spectra of <b>8</b> and <b>9</b> | S106-S107 |
| <b>VIII</b> | X-ray crystal structure and data of <b>3a</b>  | S108-S109 |
| <b>IX</b>   | X-ray crystal structure and data of <b>5a</b>  | S110-S111 |
| <b>X</b>    | References                                     | S112      |

## I. General experimental information

Commercial reagents were used without further purification. 1-Phenylpyrazolidinones (**1**),<sup>[1,2]</sup> propargyl alcohols (**2**, **4**, **6**),<sup>[3,4]</sup> and  $[\text{RhCp}^*\text{Cl}_2]_2$ <sup>[5]</sup> were prepared based on literature procedures. Melting points were recorded with a micro melting point apparatus and uncorrected. The  $^1\text{H}$  NMR spectra were recorded at 400 MHz or 600 MHz. The  $^{13}\text{C}$  NMR spectra were recorded at 100 MHz or 150 MHz. The  $^{19}\text{F}$  NMR spectra were recorded at 376 MHz. Chemical shifts were expressed in parts per million ( $\delta$ ), and were reported as s (singlet), d (doublet), t (triplet), dd (doublet of doublets), m (multiplet), br s (broad singlet), etc. The coupling constants  $J$  were given in Hz. High resolution mass spectra (HRMS) were obtained *via* ESI mode by using a MicrOTOF mass spectrometer. All reactions were monitored by thin layer chromatography (TLC) using silica gel plates (silica gel 60 F254 0.25 mm), and components were visualized by observation under UV light (254 and 365 nm).

## II. Experimental procedures and spectroscopic data

### 1. Typical procedure for the synthesis of 3a and spectroscopic data of 3a-3ee, 5a-5m and 7a-7q

To a reaction tube equipped with a stir bar were charged with 1-phenylpyrazolidin-3-one (**1a**, 48.7 mg, 0.3 mmol), toluene (2 mL), [RhCp\*Cl<sub>2</sub>]<sub>2</sub> (4.7 mg, 0.0075 mmol), Zn(OAc)<sub>2</sub> (27.5 mg, 0.15 mmol), NaOAc (12.3 mg, 0.15 mmol) and 2-methyl-4-phenylbut-3-yn-2-ol (**2a**, 48.1 mg, 0.3 mmol). The resulting mixture was stirred at 100 °C (oil bath) for 4 h under air. Upon completion, it was cooled to room temperature, filtered through a pad of celite and concentrated under reduced pressure. The residue was purified by silica gel chromatography using petroleum ether/ethyl acetate (3:1) as eluent to afford **3a** (80.5 mg, 88%). **3b-3ee**, **5a-5m** and **7a-7q** were obtained in a similar manner.

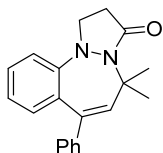

#### 5,5-Dimethyl-7-phenyl-1,2-dihydro-3H,5H-benzo[c]pyrazolo[1,2-a][1,2]diazepin-3-one (**3a**)

White solid (80.5 mg, 88%), mp 173.2-174.5 °C. <sup>1</sup>H NMR (400 MHz, CDCl<sub>3</sub>) δ 1.67 (s, 6H), 2.77 (t, *J* = 7.2 Hz, 2H), 4.10 (t, *J* = 7.2 Hz, 2H), 5.99 (s, 1H), 6.99-7.01 (m, 1H), 7.03-7.07 (m, 1H), 7.18-7.20 (m, 2H), 7.25-7.26 (m, 2H), 7.28-7.33 (m, 3H). <sup>13</sup>C{<sup>1</sup>H} NMR (100 MHz, CDCl<sub>3</sub>) δ 26.9, 33.3, 49.0, 63.1, 116.3, 124.4, 127.4, 127.9, 128.1, 129.3, 132.1, 132.6, 136.5, 139.9, 144.4, 149.6, 173.6. HRMS calcd for C<sub>20</sub>H<sub>21</sub>N<sub>2</sub>O: 305.1648 [M+H]<sup>+</sup>, found: 305.1647.

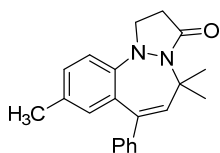

#### 5,5,9-Trimethyl-7-phenyl-1,2-dihydro-3H,5H-benzo[c]pyrazolo[1,2-a][1,2]diazepin-3-one (**3b**)

White solid (80.4 mg, 84%), mp 155.3-156.7 °C. <sup>1</sup>H NMR (400 MHz, CDCl<sub>3</sub>) δ 1.66 (s, 6H), 2.20 (s, 3H), 2.77 (t, *J* = 7.6 Hz, 2H), 4.08 (t, *J* = 7.6 Hz, 2H), 5.99 (s, 1H), 6.80 (s, 1H), 7.07 (d, *J* = 8.0 Hz, 1H), 7.16 (d, *J* = 8.4 Hz, 1H), 7.19-7.21 (m, 2H), 7.31-7.33 (m, 3H). <sup>13</sup>C{<sup>1</sup>H} NMR (100 MHz, CDCl<sub>3</sub>) δ 20.8, 26.8, 33.3, 49.0, 62.7,

116.2, 127.3, 128.1, 128.5, 129.2, 132.4, 132.5, 134.0, 136.7, 139.8, 144.3, 147.2, 173.2. HRMS calcd for  $C_{21}H_{23}N_2O$ : 319.1805  $[M+H]^+$ , found: 319.1804.

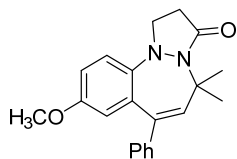

**9-Methoxy-5,5-dimethyl-7-phenyl-1,2-dihydro-3H,5H-benzo[c]pyrazolo[1,2-a][1,2]diazepin-3-one (3c)**

Light yellow solid (70.2 mg, 70%), mp 170.1-172.0 °C.  $^1H$  NMR (400 MHz,  $CDCl_3$ )  $\delta$  1.65 (s, 6H), 2.77 (t,  $J = 7.2$  Hz, 2H), 3.65 (s, 3H), 4.06 (t,  $J = 7.2$  Hz, 2H), 6.02 (s, 1H), 6.54 (d,  $J = 2.4$  Hz, 1H), 6.81 (dd,  $J_1 = 9.2$  Hz,  $J_2 = 2.4$  Hz, 1H), 7.18-7.23 (m, 3H), 7.30-7.33 (m, 3H).  $^{13}C\{^1H\}$  NMR (150 MHz,  $CDCl_3$ )  $\delta$  26.8, 33.4, 49.1, 55.4, 62.6, 113.1, 117.2, 117.3, 127.5, 128.2, 129.2, 134.0, 136.7, 140.1, 143.1, 143.9, 156.2, 172.9. HRMS calcd for  $C_{21}H_{23}N_2O_2$ : 335.1754  $[M+H]^+$ , found: 335.1754.

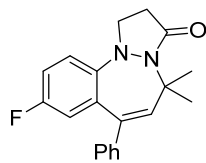

**9-Fluoro-5,5-dimethyl-7-phenyl-1,2-dihydro-3H,5H-benzo[c]pyrazolo[1,2-a][1,2]diazepin-3-one (3d)**

White solid (79.3 mg, 82%), mp 168.0-169.2 °C.  $^1H$  NMR (400 MHz,  $CDCl_3$ )  $\delta$  1.67(s, 6H), 2.77 (t,  $J = 7.2$  Hz, 2H), 4.08 (t,  $J = 7.6$  Hz, 2H), 6.02 (s, 1H), 6.71 (dd,  $J_1 = 9.6$  Hz,  $J_2 = 2.8$  Hz, 1H), 6.95 (td,  $J_1 = 8.4$  Hz,  $J_2 = 2.8$  Hz, 1H), 7.18-7.23 (m, 3H), 7.32-7.35 (m, 3H).  $^{13}C\{^1H\}$  NMR (100 MHz,  $CDCl_3$ )  $\delta$  26.8, 33.2, 49.4, 63.1, 114.3 (d,  $^2J_{C-F} = 22.4$  Hz), 117.5 (d,  $^3J_{C-F} = 8.7$  Hz), 118.4 (d,  $^2J_{C-F} = 23.2$  Hz), 127.6, 128.3, 129.2, 134.6 (d,  $^3J_{C-F} = 7.3$  Hz), 135.6 (d,  $^4J_{C-F} = 2.1$  Hz), 141.0, 143.7, 145.8 (d,  $^4J_{C-F} = 2.9$  Hz), 159.4 (d,  $^1J_{C-F} = 242.0$  Hz), 173.5.  $^{19}F$  NMR (376 MHz,  $CDCl_3$ )  $\delta$  -118.14 – -118.08 (m). HRMS calcd for  $C_{20}H_{20}FN_2O$ : 323.1554  $[M+H]^+$ , found: 323.1553.

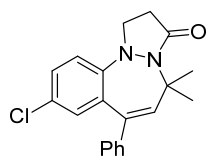

**9-Chloro-5,5-dimethyl-7-phenyl-1,2-dihydro-3H,5H-benzo[c]pyrazolo[1,2-a][1,2]diazepin-3-one (3e)**

White solid (74.1 mg, 73%), mp 179.0-180.2 °C.  $^1\text{H}$  NMR (400 MHz,  $\text{CDCl}_3$ )  $\delta$  1.67 (s, 6H), 2.75 (t,  $J = 7.2$  Hz, 2H), 4.07 (t,  $J = 7.2$  Hz, 2H), 6.00 (s, 1H), 6.97 (d,  $J = 2.0$  Hz, 1H), 7.17-7.23 (m, 4H), 7.32-7.36 (m, 3H).  $^{13}\text{C}\{^1\text{H}\}$  NMR (100 MHz,  $\text{CDCl}_3$ )  $\delta$  26.8, 33.1, 49.2, 63.3, 117.5, 127.6, 127.7, 128.4, 129.2, 129.8, 131.7, 134.3, 135.3, 141.2, 143.8, 148.2, 173.6. HRMS calcd for  $\text{C}_{20}\text{H}_{20}\text{ClN}_2\text{O}$ : 339.1259  $[\text{M}+\text{H}]^+$ , found: 339.1242.

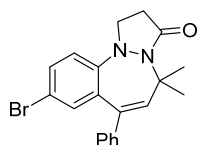

### 9-Bromo-5,5-dimethyl-7-phenyl-1,2-dihydro-3H,5H-benzo[*c*]pyrazolo[1,2-*a*][1,2]diazepin-3-one (3f)

White solid (90.5 mg, 79%), mp 177.6-179.0 °C.  $^1\text{H}$  NMR (400 MHz,  $\text{CDCl}_3$ )  $\delta$  1.67 (s, 6H), 2.75 (t,  $J = 7.2$  Hz, 2H), 4.07 (t,  $J = 7.2$  Hz, 2H), 6.00 (s, 1H), 7.11-7.14 (m, 2H), 7.17-7.19 (m, 2H), 7.33-7.38 (m, 4H).  $^{13}\text{C}\{^1\text{H}\}$  NMR (100 MHz,  $\text{CDCl}_3$ )  $\delta$  26.8, 33.1, 49.2, 63.3, 117.5, 117.9, 127.7, 128.4, 129.2, 130.5, 134.60, 134.63, 135.2, 141.3, 143.7, 148.7, 173.6. HRMS calcd for  $\text{C}_{20}\text{H}_{20}\text{BrN}_2\text{O}$ : 383.0754  $[\text{M}+\text{H}]^+$ , found: 383.0751.

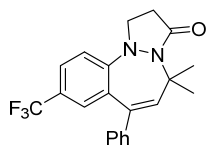

### 5,5-Dimethyl-7-phenyl-9-(trifluoromethyl)-1,2-dihydro-3H,5H-benzo[*c*]pyrazolo[1,2-*a*][1,2]diazepin-3-one (3g)

White solid (91.5 mg, 82%), mp 180.3-181.2 °C.  $^1\text{H}$  NMR (400 MHz,  $\text{CDCl}_3$ )  $\delta$  1.69 (s, 6H), 2.77 (t,  $J = 7.2$  Hz, 2H), 4.13 (t,  $J = 7.2$  Hz, 2H), 6.03 (s, 1H), 7.15-7.17 (m, 2H), 7.26 (s, 1H), 7.33-7.36 (m, 4H), 7.51 (d,  $J = 8.4$  Hz, 1H).  $^{13}\text{C}\{^1\text{H}\}$  NMR (100 MHz,  $\text{CDCl}_3$ )  $\delta$  26.9, 33.0, 49.3, 63.8, 116.4, 123.9 (q,  $^1J_{\text{C-F}} = 270.1$  Hz), 124.5 (q,  $^3J_{\text{C-F}} = 3.6$  Hz), 126.5 (q,  $^2J_{\text{C-F}} = 32.5$  Hz), 127.8, 128.4, 129.17, 129.24 (q,  $^3J_{\text{C-F}} = 3.6$  Hz), 132.9, 135.1, 141.6, 143.8, 152.5, 174.1.  $^{19}\text{F}$  NMR (376 MHz,  $\text{CDCl}_3$ )  $\delta$  -62.22 (s). HRMS calcd for  $\text{C}_{21}\text{H}_{20}\text{F}_3\text{N}_2\text{O}$ : 373.1522  $[\text{M}+\text{H}]^+$ , found: 373.1523.

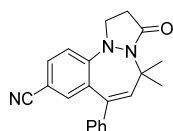

### 5,5-Dimethyl-3-oxo-7-phenyl-2,3-dihydro-1*H*,5*H*-benzo[*c*]pyrazolo[1,2-*a*][1,2]diazepine-9-carbonitrile (3h)

Light yellow solid (77.4 mg, 78%), mp 185.0-186.8 °C. <sup>1</sup>H NMR (400 MHz, CDCl<sub>3</sub>) δ 1.69 (s, 6H), 2.75 (t, *J* = 7.2 Hz, 2H), 4.13 (t, *J* = 7.2 Hz, 2H), 6.00 (s, 1H), 7.12-7.15 (m, 2H), 7.29 (d, *J* = 1.2 Hz, 1H), 7.31-7.36 (m, 4H), 7.54 (dd, *J*<sub>1</sub> = 8.4 Hz, *J*<sub>2</sub> = 1.6 Hz, 1H). <sup>13</sup>C{<sup>1</sup>H} NMR (100 MHz, CDCl<sub>3</sub>) δ 26.9, 32.9, 49.3, 64.2, 107.9, 116.8, 118.6, 127.9, 128.6, 129.2, 131.1, 133.3, 134.2, 136.2, 142.2, 143.7, 153.4, 174.4. HRMS calcd for C<sub>21</sub>H<sub>20</sub>N<sub>3</sub>O: 330.1601 [M+H]<sup>+</sup>, found: 330.1596.

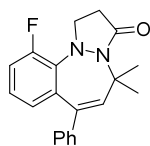

### 11-Fluoro-5,5-dimethyl-7-phenyl-1,2-dihydro-3*H*,5*H*-benzo[*c*]pyrazolo[1,2-*a*][1,2]diazepin-3-one (3i)

Light yellow solid (62.8 mg, 65%), mp 183.2-184.3 °C. <sup>1</sup>H NMR (400 MHz, CDCl<sub>3</sub>) δ 1.62 (s, 6H), 2.85 (t, *J* = 7.2 Hz, 2H), 4.11 (t, *J* = 7.2 Hz, 2H), 6.11 (s, 1H), 6.77-6.79 (m, 1H), 7.00-7.04 (m, 2H), 7.19-7.21 (m, 2H), 7.30-7.33 (m, 3H). <sup>13</sup>C{<sup>1</sup>H} NMR(100 MHz, CDCl<sub>3</sub>) δ 26.7, 35.0 (d, <sup>5</sup>*J*<sub>C-F</sub> = 7.2 Hz), 51.6 (d, <sup>4</sup>*J*<sub>C-F</sub> = 12.3 Hz), 62.4, 116.3 (d, <sup>2</sup>*J*<sub>C-F</sub> = 24.5 Hz), 125.5 (d, <sup>3</sup>*J*<sub>C-F</sub> = 9.3 Hz), 127.1 (d, <sup>3</sup>*J*<sub>C-F</sub> = 2.9 Hz), 127.6, 128.2, 129.0, 136.1 (d, <sup>2</sup>*J*<sub>C-F</sub> = 10.1 Hz), 137.0 (d, <sup>4</sup>*J*<sub>C-F</sub> = 2.9 Hz), 137.2(d, <sup>4</sup>*J*<sub>C-F</sub> = 2.9 Hz), 140.4, 143.9, 153.9 (d, <sup>1</sup>*J*<sub>C-F</sub> = 243.4 Hz), 174.0. <sup>19</sup>F NMR (376 MHz, CDCl<sub>3</sub>) δ -119.91 (dd, *J*<sub>1</sub> = 10.9 Hz, *J*<sub>2</sub> = 5.6 Hz). HRMS calcd for C<sub>20</sub>H<sub>20</sub>FN<sub>2</sub>O: 323.1554 [M+H]<sup>+</sup>, found: 323.1551.

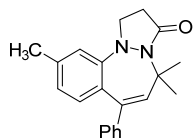

### 5,5,10-Trimethyl-7-phenyl-1,2-dihydro-3*H*,5*H*-benzo[*c*]pyrazolo[1,2-*a*][1,2]diazepin-3-one (3j)

White solid (87.0 mg, 91%), mp 164.7-165.6 °C. <sup>1</sup>H NMR (400 MHz, CDCl<sub>3</sub>) δ 1.66 (s, 6H), 2.39 (s, 3H), 2.78 (t, *J* = 7.6 Hz, 2H), 4.09 (t, *J* = 7.6 Hz, 2H), 5.94 (s, 1H), 6.88 (s, 2H), 7.05 (s 1H), 7.18-7.20 (m, 2H), 7.29-7.33 (m, 3H). <sup>13</sup>C{<sup>1</sup>H} NMR (100 MHz, CDCl<sub>3</sub>) δ 21.7, 26.9, 33.3, 48.9, 63.0, 117.1, 125.3, 127.3, 128.1, 129.3, 129.9, 131.9, 136.5, 137.9, 139.1, 144.5, 149.4, 173.5. HRMS calcd for C<sub>21</sub>H<sub>23</sub>N<sub>2</sub>O: 319.1805 [M+H]<sup>+</sup>, found:

319.1804.

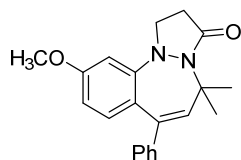

**10-Methoxy-5,5-dimethyl-7-phenyl-1,2-dihydro-3H,5H-benzo[c]pyrazolo[1,2-a][1,2]diazepin-3-one (3k)**

Brown syrup (75.1 mg, 75%).  $^1\text{H}$  NMR (400 MHz,  $\text{CDCl}_3$ )  $\delta$  1.66 (s, 6H), 2.77 (t,  $J = 7.2$  Hz, 2H), 3.82 (s, 3H), 4.06 (t,  $J = 7.2$  Hz, 2H), 5.86 (s, 1H), 6.60 (dd,  $J_1 = 8.4$  Hz,  $J_2 = 2.0$  Hz, 1H), 6.80 (d,  $J = 2.4$  Hz, 1H), 6.92 (d,  $J = 8.8$  Hz, 1H), 7.19-7.21 (m, 2H), 7.28-7.32 (m, 3H).  $^{13}\text{C}\{^1\text{H}\}$  NMR (100 MHz,  $\text{CDCl}_3$ )  $\delta$  26.8, 33.4, 49.1, 55.4, 62.6, 113.1, 117.2, 117.3, 127.5, 128.2, 129.2, 134.0, 136.7, 140.1, 143.1, 143.9, 156.2, 172.9. HRMS calcd for  $\text{C}_{21}\text{H}_{23}\text{N}_2\text{O}_2$ : 335.1754  $[\text{M}+\text{H}]^+$ , found: 335.1754.

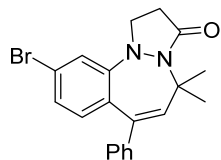

**10-Bromo-5,5-dimethyl-7-phenyl-1,2-dihydro-3H,5H-benzo[c]pyrazolo[1,2-a][1,2]diazepin-3-one (3l)**

Light yellow solid (99.7 mg, 87%), mp 180.5-181.9 °C.  $^1\text{H}$  NMR (400 MHz,  $\text{CDCl}_3$ )  $\delta$  1.67 (s, 6H), 2.77 (t,  $J = 7.6$  Hz, 2H), 4.07 (t,  $J = 7.6$  Hz, 2H), 5.97 (s, 1H), 6.86 (d,  $J = 8.4$  Hz, 1H), 7.16-7.19 (m, 3H), 7.31-7.33 (m, 3H), 7.38 (s, 1H).  $^{13}\text{C}\{^1\text{H}\}$  NMR (100 MHz,  $\text{CDCl}_3$ )  $\delta$  26.8, 33.1, 49.2, 63.3, 117.5, 127.6, 127.7, 128.4, 129.2, 129.8, 131.7, 134.3, 135.3, 141.2, 143.8, 148.2, 173.6. HRMS calcd for  $\text{C}_{20}\text{H}_{20}\text{BrN}_2\text{O}$ : 383.0754  $[\text{M}+\text{H}]^+$ , found: 383.0748.

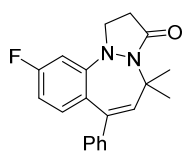

**10-Fluoro-5,5-dimethyl-7-phenyl-1,2-dihydro-3H,5H-benzo[c]pyrazolo[1,2-a][1,2]diazepin-3-one (3m)**

White solid (34.8 mg, 36%), mp 153.8-154.6 °C.  $^1\text{H}$  NMR (400 MHz,  $\text{CDCl}_3$ )  $\delta$  1.67 (s, 6H), 2.77 (t,  $J = 7.6$  Hz, 2H), 4.06 (t,  $J = 7.6$  Hz, 2H), 5.93 (s, 1H), 6.77 (td,  $J_1 = 8.0$  Hz,  $J_2 = 2.4$  Hz, 1H), 6.95-6.98 (m, 2H), 7.16-7.18 (m, 2H), 7.30-7.33 (m, 3H).  $^{13}\text{C}\{^1\text{H}\}$  NMR (100 MHz,  $\text{CDCl}_3$ )  $\delta$  26.9, 32.9, 49.2, 63.4, 104.1 (d,  $^2J_{\text{C-F}} = 23.8$

Hz), 111.3 (d,  $^2J_{C-F} = 20.9$  Hz), 127.5, 128.2, 128.6 (d,  $^4J_{C-F} = 2.9$  Hz), 129.2, 133.6 (d,  $^3J_{C-F} = 8.7$  Hz), 135.5, 139.5, 144.3, 151.2 (d,  $^3J_{C-F} = 6.5$  Hz), 161.7 (d,  $^1J_{C-F} = 247.0$  Hz), 173.6.  $^{19}\text{F}$  NMR (376 MHz,  $\text{CDCl}_3$ )  $\delta$  -112.09 – -112.02 (m). HRMS calcd for  $\text{C}_{20}\text{H}_{20}\text{FN}_2\text{O}$ : 323.1554  $[\text{M}+\text{H}]^+$ , found: 323.1555.

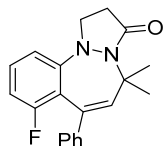

### 8-Fluoro-5,5-dimethyl-7-phenyl-1,2-dihydro-3H,5H-benzo[c]pyrazolo[1,2-a][1,2]diazepin-3-one (3m')

Light yellow solid (32.8 mg, 34%), mp 186.0-188.2 °C.  $^1\text{H}$  NMR (400 MHz,  $\text{CDCl}_3$ )  $\delta$  1.65 (s, 6H), 2.75 (brs, 2H), 4.07 (t,  $J = 7.6$  Hz, 2H), 6.22 (s, 1H), 6.84-6.89 (m, 1H), 7.11 (d,  $J = 8.0$  Hz, 1H), 7.14-7.17 (m, 2H), 7.27-7.33 (m, 4H).  $^{13}\text{C}\{^1\text{H}\}$  NMR (150 MHz,  $\text{CDCl}_3$ )  $\delta$  26.8, 33.1, 49.0, 61.7, 112.4 (d,  $^4J_{C-F} = 3.3$  Hz), 113.1 (d,  $^2J_{C-F} = 21.9$  Hz), 120.8 (d,  $^2J_{C-F} = 12.0$  Hz), 126.7, 127.3, 128.2, 129.1 (d,  $^3J_{C-F} = 9.9$  Hz), 133.2, 141.8, 143.2 (d,  $^4J_{C-F} = 2.3$  Hz), 151.4 (d,  $^3J_{C-F} = 5.4$  Hz), 161.0 (d,  $^1J_{C-F} = 250.5$  Hz), 172.1.  $^{19}\text{F}$  NMR (376 MHz,  $\text{CDCl}_3$ )  $\delta$  -101.96 (dd,  $J_1 = 9.8$  Hz,  $J_2 = 5.6$  Hz). HRMS calcd for  $\text{C}_{20}\text{H}_{20}\text{FN}_2\text{O}$ : 323.1554  $[\text{M}+\text{H}]^+$ , found: 323.1554.

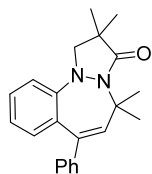

### 2,2,5,5-Tetramethyl-7-phenyl-1,2-dihydro-3H,5H-benzo[c]pyrazolo[1,2-a][1,2]diazepin-3-one (3n)

White solid (80.7 mg, 81%), mp 166.8-167.9 °C.  $^1\text{H}$  NMR (600 MHz,  $\text{CDCl}_3$ )  $\delta$  1.32 (s, 6H), 1.68 (s, 6H), 4.03 (s, 2H), 5.93 (s, 1H), 6.97-7.00 (m, 2H), 7.16-7.18 (m, 2H), 7.20-7.23 (m, 1H), 7.28-7.32 (m, 3H), 7.34 (d,  $J = 7.8$  Hz, 1H).  $^{13}\text{C}\{^1\text{H}\}$  NMR (100 MHz,  $\text{CDCl}_3$ )  $\delta$  24.7, 26.8, 42.4, 59.8, 63.8, 117.2, 123.5, 127.0, 127.2, 128.1, 129.4, 131.9, 132.4, 136.4, 139.8, 145.0, 149.7, 180.4. HRMS calcd for  $\text{C}_{22}\text{H}_{25}\text{N}_2\text{O}$ : 333.1961  $[\text{M}+\text{H}]^+$ , found: 333.1959.

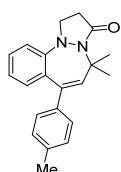



**5,5-Dimethyl-7-(*p*-tolyl)-1,2-dihydro-3*H*,5*H*-benzo[*c*]pyrazolo[1,2-*a*][1,2]diazepin-3-one (3o)**

White solid (83 mg, 87%), mp 199.1-200.2 °C. <sup>1</sup>H NMR (600 MHz, CDCl<sub>3</sub>) δ 1.66 (s, 6H), 2.36 (s, 3H), 2.77 (t, *J* = 7.2 Hz, 2H), 4.09 (t, *J* = 7.2 Hz, 2H), 5.98 (s, 1H), 7.01-7.06 (m, 2H), 7.08 (d, *J* = 8.4 Hz, 2H), 7.12 (d, *J* = 7.8 Hz, 2H), 7.24-7.25 (m, 2H). <sup>13</sup>C{<sup>1</sup>H} NMR (150 MHz, CDCl<sub>3</sub>) δ 21.2, 26.9, 33.3, 49.0, 63.0, 116.3, 124.4, 127.8, 128.8, 129.2, 132.1, 132.8, 136.4, 137.1, 139.4, 141.6, 149.5, 173.5. HRMS calcd for C<sub>21</sub>H<sub>23</sub>N<sub>2</sub>O: 319.1805 [M+H]<sup>+</sup>, found: 319.1807.

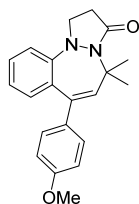

**7-(4-Methoxyphenyl)-5,5-dimethyl-1,2-dihydro-3*H*,5*H*-benzo[*c*]pyrazolo[1,2-*a*][1,2]diazepin-3-one (3p)**

White solid (83.9 mg, 84%), mp 184.5-185.2 °C. <sup>1</sup>H NMR (600 MHz, CDCl<sub>3</sub>) δ 1.66 (s, 6H), 2.77 (t, *J* = 7.2 Hz, 2H), 3.81 (s, 3H), 4.09 (t, *J* = 7.2 Hz, 2H), 5.98 (s, 1H), 6.83-6.85 (m, 2H), 7.03-7.07 (m, 2H), 7.10-7.13 (m, 2H), 7.25-7.26 (m, 2H). <sup>13</sup>C{<sup>1</sup>H} NMR (150 MHz, CDCl<sub>3</sub>) δ 26.9, 33.3, 49.0, 55.3, 62.8, 113.5, 116.3, 124.4, 127.8, 130.4, 132.1, 132.9, 136.1, 136.9, 139.0, 149.5, 159.1, 173.3. HRMS calcd for C<sub>21</sub>H<sub>23</sub>N<sub>2</sub>O<sub>2</sub>: 335.1754 [M+H]<sup>+</sup>, found: 335.1760.

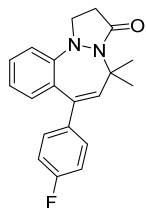

**7-(4-Fluorophenyl)-5,5-dimethyl-1,2-dihydro-3*H*,5*H*-benzo[*c*]pyrazolo[1,2-*a*][1,2]diazepin-3-one (3q)**

White solid (71.5 mg, 74%), mp 193.0-194.6 °C. <sup>1</sup>H NMR (400 MHz, CDCl<sub>3</sub>) δ 1.67 (s, 6H), 2.77 (t, *J* = 7.2 Hz, 2H), 4.10 (t, *J* = 7.2 Hz, 2H), 5.97 (s, 1H), 6.97-7.02 (m, 3H), 7.04-7.08 (m, 1H), 7.14-7.17 (m, 2H), 7.25-7.27 (m, 2H). <sup>13</sup>C{<sup>1</sup>H} NMR (100 MHz, CDCl<sub>3</sub>) δ 26.9, 33.2, 49.0, 63.0, 115.0 (d, <sup>2</sup>*J*<sub>C-F</sub> = 20.9 Hz), 116.3, 124.5, 128.0, 130.8 (d, <sup>3</sup>*J*<sub>C-F</sub> = 8.0 Hz), 132.0, 132.4, 135.5, 139.9, 140.4 (d, <sup>4</sup>*J*<sub>C-F</sub> = 2.8 Hz), 149.6, 162.3 (d, <sup>1</sup>*J*<sub>C-F</sub> = 244.8 Hz), 173.5. <sup>19</sup>F NMR (376 MHz, CDCl<sub>3</sub>) δ -115.13 – -115.06 (m). HRMS calcd for C<sub>20</sub>H<sub>20</sub>FN<sub>2</sub>O: 319.1505 [M+H]<sup>+</sup>, found: 319.1507.

323.1554 [M+H]<sup>+</sup>, found: 323.1557.

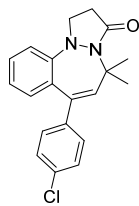

**7-(4-Chlorophenyl)-5,5-dimethyl-1,2-dihydro-3H,5H-benzo[c]pyrazolo[1,2-a][1,2]diazepin-3-one (3r)**

White solid (84.2 mg, 83%), mp 219.6-220.4 °C. <sup>1</sup>H NMR (400 MHz, CDCl<sub>3</sub>) δ 1.66 (s, 6H), 2.77 (t, *J* = 7.2 Hz, 2H), 4.10 (t, *J* = 7.6 Hz, 2H), 5.97 (s, 1H), 6.97 (d, *J* = 7.6 Hz, 1H), 7.05-7.09 (m, 1H), 7.13 (d, *J* = 8.0 Hz, 2H), 7.27-7.29 (m, 4H). <sup>13</sup>C{<sup>1</sup>H} NMR (100 MHz, CDCl<sub>3</sub>) δ 26.8, 33.2, 49.0, 63.1, 116.3, 124.5, 128.1, 128.3, 130.6, 131.9, 132.2, 133.3, 135.4, 140.2, 142.8, 149.6, 173.6. HRMS calcd for C<sub>20</sub>H<sub>20</sub>ClN<sub>2</sub>O: 339.1259 [M+H]<sup>+</sup>, found: 339.1258.

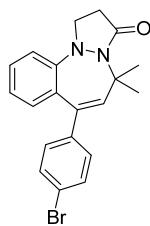

**7-(4-Bromophenyl)-5,5-dimethyl-1,2-dihydro-3H,5H-benzo[c]pyrazolo[1,2-a][1,2]diazepin-3-one (3s)**

White solid (91.7 mg, 80%), mp 213.2-214.5 °C. <sup>1</sup>H NMR (400 MHz, CDCl<sub>3</sub>) δ 1.66 (s, 6H), 2.77 (t, *J* = 7.6 Hz, 2H), 4.10 (t, *J* = 7.6 Hz, 2H), 5.96 (s, 1H), 6.97 (d, *J* = 7.6 Hz, 1H), 7.04-7.08 (m, 3H), 7.26-7.30 (m, 2H), 7.44 (d, *J* = 8.0 Hz, 2H). <sup>13</sup>C{<sup>1</sup>H} NMR (100 MHz, CDCl<sub>3</sub>) δ 26.8, 33.2, 49.0, 63.1, 116.3, 121.5, 124.5, 128.1, 130.9, 131.3, 131.9, 132.1, 135.4, 140.2, 143.3, 149.6, 173.6. HRMS calcd for C<sub>20</sub>H<sub>20</sub>BrN<sub>2</sub>O: 383.0754 [M+H]<sup>+</sup>, found: 383.0760.

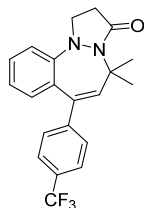

**5,5-Dimethyl-7-(4-(trifluoromethyl)phenyl)-1,2-dihydro-3H,5H-benzo[c]pyrazolo[1,2-a][1,2]diazepin-3-on**

**e (3t)**

White solid (90.4 mg, 81%), mp 126.4-127.4 °C. <sup>1</sup>H NMR (400 MHz, CDCl<sub>3</sub>) δ 1.68 (s, 6H), 2.78 (t, *J* = 7.2 Hz, 2H), 4.12 (t, *J* = 7.2 Hz, 2H), 5.99 (s, 1H), 6.93 (d, *J* = 7.6 Hz, 1H), 7.05-7.09 (m, 1H), 7.27-7.32 (m, 4H), 7.57 (d, *J* = 8.0 Hz, 2H). <sup>13</sup>C{<sup>1</sup>H} NMR (100 MHz, CDCl<sub>3</sub>) δ 26.8, 33.2, 49.1, 63.3, 116.4, 124.2 (q, <sup>1</sup>*J*<sub>C-F</sub> = 270.8 Hz), 124.6, 125.1 (q, <sup>3</sup>*J*<sub>C-F</sub> = 3.6 Hz), 128.2, 129.5 (q, <sup>2</sup>*J*<sub>C-F</sub> = 31.8 Hz), 129.6, 131.8, 131.9, 135.3, 141.1, 148.0, 149.7, 173.8. <sup>19</sup>F NMR (376 MHz, CDCl<sub>3</sub>) δ -62.40 (s). HRMS calcd for C<sub>21</sub>H<sub>20</sub>F<sub>3</sub>N<sub>2</sub>O: 373.1522 [M+H]<sup>+</sup>, found: 373.1527.

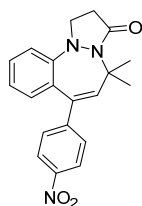**5,5-Dimethyl-7-(4-nitrophenyl)-1,2-dihydro-3H,5H-benzo[c]pyrazolo[1,2-a][1,2]diazepin-3-one(3u)**

Light yellow solid (68.1 mg, 65%), mp 168.6-170.2 °C. <sup>1</sup>H NMR (400 MHz, CDCl<sub>3</sub>) δ 1.70 (s, 6H), 2.79 (t, *J* = 7.2 Hz, 2H), 4.12 (t, *J* = 7.6 Hz, 2H), 6.03 (s, 1H), 6.89-6.91 (m, 1H), 7.07-7.11 (m, 1H), 7.29-7.32 (m, 2H), 7.34-7.31 (m, 2H), 8.16-8.19 (m, 2H). <sup>13</sup>C{<sup>1</sup>H} NMR (100 MHz, CDCl<sub>3</sub>) δ 26.7, 33.2, 49.1, 63.4, 116.5, 123.5, 124.7, 128.5, 130.0, 131.4, 131.8, 134.7, 141.9, 147.1, 149.8, 151.0, 173.8. HRMS calcd for C<sub>20</sub>H<sub>20</sub>N<sub>3</sub>O<sub>3</sub>: 350.1499 [M+H]<sup>+</sup>, found: 350.1497.

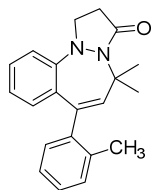**5,5-Dimethyl-7-(o-tolyl)-1,2-dihydro-3H,5H-benzo[c]pyrazolo[1,2-a][1,2]diazepin-3-one (3v)**

White solid (85.9 mg, 90%), mp 132.8-134.1 °C. <sup>1</sup>H NMR (400 MHz, CDCl<sub>3</sub>) δ 1.69(s, 6H), 1.96 (s, 3H), 2.76 (brs, 2H), 4.11 (t, *J* = 7.2 Hz, 2H), 5.74 (s, 1H), 6.79 (d, *J* = 8.0 Hz, 1H), 6.94-6.98 (m, 1H), 7.13-7.16 (m, 2H), 7.17-7.24 (m, 4H). <sup>13</sup>C{<sup>1</sup>H} NMR (100 MHz, CDCl<sub>3</sub>) δ 19.7, 26.9, 33.4, 49.2, 63.8, 115.9, 124.4, 125.7, 127.38, 127.40, 130.1, 130.2, 131.1, 132.3, 135.0, 136.5, 140.4, 144.0, 148.9, 174.6. HRMS calcd for C<sub>21</sub>H<sub>23</sub>N<sub>2</sub>O: 350.1717 [M+H]<sup>+</sup>, found: 350.1717.

319.1805 [M+H]<sup>+</sup>, found: 319.1808.

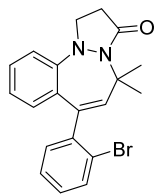

**7-(2-Bromophenyl)-5,5-dimethyl-1,2-dihydro-3H,5H-benzo[c]pyrazolo[1,2-a][1,2]diazepin-3-one (3w)**

White solid (99.7 mg, 87%), mp 177.4-179.2 °C. <sup>1</sup>H NMR (400 MHz, CDCl<sub>3</sub>) δ 1.71 (s, 6H), 2.77 (t, *J* = 7.2 Hz, 2H), 4.13 (t, *J* = 7.2 Hz, 2H), 5.75 (s, 1H), 6.77 (d, *J* = 7.6 Hz, 1H), 6.98-7.02 (m, 1H), 7.16-7.31 (m, 5H), 7.59 (d, *J* = 8.0 Hz, 1H). <sup>13</sup>C{<sup>1</sup>H} NMR (150 MHz, CDCl<sub>3</sub>) δ 26.8, 33.2, 49.0, 63.2, 116.4, 124.6, 127.46, 127.50, 128.1, 129.3, 129.4, 131.9, 132.0, 134.0, 135.3, 140.6, 146.2, 149.6, 173.7. HRMS calcd for C<sub>20</sub>H<sub>20</sub>BrN<sub>2</sub>O: 383.0754 [M+H]<sup>+</sup>, found: 383.0757.

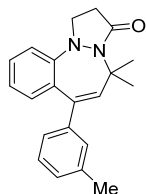

**5,5-Dimethyl-7-(*m*-tolyl)-1,2-dihydro-3H,5H-benzo[c]pyrazolo[1,2-a][1,2]diazepin-3-one (3x)**

White solid (78.3 mg, 82%), mp 131.1-132.0 °C. <sup>1</sup>H NMR (400 MHz, CDCl<sub>3</sub>) δ 1.67 (s, 6H), 2.33 (s, 3H), 2.77 (t, *J* = 7.6 Hz, 2H), 4.10 (t, *J* = 7.2 Hz, 2H), 5.98 (s, 1H), 6.98-7.02 (m, 3H), 7.04-7.08 (m, 1H), 7.11 (d, *J* = 7.6 Hz, 1H), 7.20 (t, *J* = 7.2 Hz, 1H), 7.25-7.26 (m, 2H). <sup>13</sup>C{<sup>1</sup>H} NMR (150 MHz, CDCl<sub>3</sub>) δ 21.4, 26.9, 33.3, 49.0, 63.0, 116.3, 124.4, 126.4, 127.8, 128.0, 128.1, 129.9, 132.2, 132.7, 136.5, 137.7, 139.7, 144.4, 149.5, 173.5. HRMS calcd for C<sub>21</sub>H<sub>23</sub>N<sub>2</sub>O: 319.1805 [M+H]<sup>+</sup>, found: 319.1807.

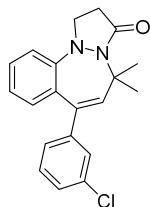

**7-(3-Chlorophenyl)-5,5-dimethyl-1,2-dihydro-3H,5H-benzo[c]pyrazolo[1,2-a][1,2]diazepin-3-one (3y)**

Light yellow solid (74.1 mg, 73%), mp 143.0-144.5 °C. <sup>1</sup>H NMR (400 MHz, CDCl<sub>3</sub>) δ 1.69 (s, 6H), 2.77 (t, *J* =

7.2 Hz, 2H), 4.10 (t,  $J = 7.2$  Hz, 2H), 5.97 (s, 1H), 6.98 (d,  $J = 8.0$  Hz, 1H), 7.06-7.10 (m, 2H), 7.20 (s, 1H), 7.22-7.28 (m, 4H).  $^{13}\text{C}\{^1\text{H}\}$  NMR (150 MHz,  $\text{CDCl}_3$ )  $\delta$  26.8, 33.2, 49.0, 63.2, 116.4, 124.6, 127.46, 127.50, 128.1, 129.3, 129.4, 131.9, 132.0, 134.0, 135.3, 140.6, 146.2, 149.6, 173.7. HRMS calcd for  $\text{C}_{20}\text{H}_{20}\text{ClN}_2\text{O}$ : 339.1259  $[\text{M}+\text{H}]^+$ , found: 339.1258.

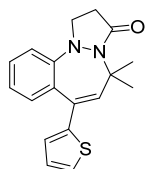

### 5,5-Dimethyl-7-(thiophen-2-yl)-1,2-dihydro-3H,5H-benzo[c]pyrazolo[1,2-a][1,2]diazepin-3-one (3z)

White solid (76.3 mg, 82%), mp 174.0-176.0 °C.  $^1\text{H}$  NMR (400 MHz,  $\text{CDCl}_3$ )  $\delta$  1.64 (s, 6H), 2.76 (t,  $J = 7.2$  Hz, 2H), 4.07 (t,  $J = 7.2$  Hz, 2H), 6.26 (s, 1H), 6.86 (d,  $J = 3.6$  Hz, 1H), 6.97 (t,  $J = 4.0$  Hz, 1H), 7.14 (t,  $J = 7.6$  Hz, 1H), 7.22 (d,  $J = 5.2$  Hz, 1H), 7.25-7.32 (m, 2H), 7.37 (d,  $J = 8.0$  Hz, 1H).  $^{13}\text{C}\{^1\text{H}\}$  NMR (150 MHz,  $\text{CDCl}_3$ )  $\delta$  26.7, 33.2, 48.8, 62.3, 116.6, 124.7, 124.9, 126.7, 127.0, 128.4, 130.3, 131.7, 132.2, 139.4, 146.7, 149.2, 172.8. HRMS calcd for  $\text{C}_{18}\text{H}_{19}\text{N}_2\text{OS}$ : 311.1213  $[\text{M}+\text{H}]^+$ , found: 311.1218.

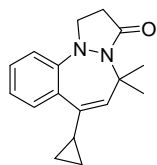

### 7-Cyclopropyl-5,5-dimethyl-1,2-dihydro-3H,5H-benzo[c]pyrazolo[1,2-a][1,2]diazepin-3-one (3aa)

White solid (70.8 mg, 88%), mp 179.0-180.9 °C.  $^1\text{H}$  NMR (400 MHz,  $\text{CDCl}_3$ )  $\delta$  0.61 (q,  $J = 5.2$  Hz, 2H), 0.82-0.87 (m, 2H), 1.54 (s, 6H), 1.58-1.62 (m, 1H), 2.73 (t,  $J = 7.2$  Hz, 2H), 4.04 (t,  $J = 7.2$  Hz, 2H), 5.66 (s, 1H), 7.18-7.26 (m, 3H), 7.90 (d,  $J = 7.6$  Hz, 1H).  $^{13}\text{C}\{^1\text{H}\}$  NMR (100 MHz,  $\text{CDCl}_3$ )  $\delta$  7.0, 19.2, 27.0, 33.3, 49.0, 62.7, 116.1, 124.6, 127.4, 128.9, 133.5, 134.3, 135.9, 148.4, 173.6. HRMS calcd for  $\text{C}_{17}\text{H}_{21}\text{N}_2\text{O}$ : 269.1648  $[\text{M}+\text{H}]^+$ , found: 269.1649.

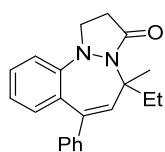

### 5-Ethyl-5-methyl-7-phenyl-1,2-dihydro-3*H*,5*H*-benzo[*c*]pyrazolo[1,2-*a*][1,2]diazepin-3-one (3bb)

White solid (77.3 mg, 81%), mp 123.5-124.2 °C. <sup>1</sup>H NMR (400 MHz, CDCl<sub>3</sub>) δ 0.86 (t, *J* = 7.2 Hz, 3H), 1.60 (s, 3H), 1.63-1.72 (m, 1H), 2.53-2.62 (m, 1H), 2.68-2.75 (m, 1H), 2.83-2.91 (m, 1H), 4.03-4.10 (m, 1H), 4.14-4.21 (m, 1H), 5.92 (s, 1H), 7.01 (d, *J* = 7.6 Hz, 1H), 7.04-7.08 (m, 1H), 7.19-7.23 (m, 2H), 7.26-7.27 (m, 2H), 7.30-7.34 (m, 3H). <sup>13</sup>C{<sup>1</sup>H} NMR (100 MHz, CDCl<sub>3</sub>) δ 9.0, 26.3, 32.0, 33.3, 48.7, 66.7, 116.4, 124.5, 127.4, 127.8, 128.1, 129.2, 132.0, 133.0, 138.2, 144.4, 149.4, 172.8. HRMS calcd for C<sub>21</sub>H<sub>23</sub>N<sub>2</sub>O: 319.1805 [M+H]<sup>+</sup>, found: 319.1803.

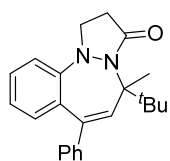

### 5-(*tert*-Butyl)-5-methyl-7-phenyl-1,2-dihydro-3*H*,5*H*-benzo[*c*]pyrazolo[1,2-*a*][1,2]diazepin-3-one (3cc)

White solid (69.6 mg, 67%), mp 176.2-171.1 °C. <sup>1</sup>H NMR (400 MHz, CDCl<sub>3</sub>) δ 1.16 (s, 9H), 1.74 (s, 3H), 2.49 (dd, *J*<sub>1</sub> = 16.4 Hz, *J*<sub>2</sub> = 6.4 Hz, 1H), 3.12-3.21 (m, 1H), 4.01 (td, *J*<sub>1</sub> = 13.6 Hz, *J*<sub>2</sub> = 6.8 Hz, 1H), 4.22 (dd, *J*<sub>1</sub> = 12.8 Hz, *J*<sub>2</sub> = 6.8 Hz, 1H), 6.19 (s, 1H), 6.95 (d, *J* = 7.6 Hz, 1H), 6.97-7.01 (m, 1H), 7.19-7.21 (m, 4H), 7.28-7.35 (m, 3H). <sup>13</sup>C{<sup>1</sup>H} NMR (100 MHz, CDCl<sub>3</sub>) δ 23.1, 27.8, 33.9, 42.7, 47.5, 72.1, 115.8, 124.0, 127.1, 127.2, 128.1, 129.5, 131.8, 132.7, 135.9, 137.1, 145.6, 150.1, 174.9. HRMS calcd for C<sub>23</sub>H<sub>27</sub>N<sub>2</sub>O: 347.2118 [M+H]<sup>+</sup>, found: 347.2114.

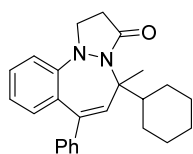

### 5-Cyclohexyl-5-methyl-7-phenyl-1,2-dihydro-3*H*,5*H*-benzo[*c*]pyrazolo[1,2-*a*][1,2]diazepin-3-one (3dd)

White solid (79.3 mg, 71%), mp 191.5-193.6 °C. <sup>1</sup>H NMR (400 MHz, CDCl<sub>3</sub>) δ 0.92-1.01 (m, 1H), 1.07-1.32 (m, 4H), 1.50-1.53 (m, 1H), 1.61-1.64 (m, 5H), 1.79-1.82 (m, 1H), 1.89-1.92 (m, 1H), 2.62-2.73 (m, 2H), 2.85-2.93 (m, 1H), 4.02-4.10 (m, 1H), 4.14-4.21 (m, 1H), 6.05 (s, 1H), 7.00 (d, *J* = 7.6 Hz, 1H), 7.04-7.08 (m, 1H), 7.19-7.22 (m, 2H), 7.25-7.27 (m, 2H), 7.31-7.34 (m, 3H). <sup>13</sup>C{<sup>1</sup>H} NMR (150 MHz, CDCl<sub>3</sub>) δ 24.5, 26.3, 26.6,

26.8, 28.0, 28.7, 33.5, 45.4, 48.7, 69.6, 116.5, 124.6, 127.4, 127.7, 128.1, 129.2, 131.9, 133.3, 135.8, 138.0, 144.8, 149.2, 172.5. HRMS calcd for C<sub>25</sub>H<sub>29</sub>N<sub>2</sub>O: 373.2274 [M+H]<sup>+</sup>, found: 373.2275.

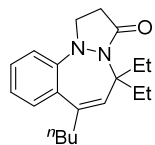

### 7-Butyl-5,5-diethyl-1,2-dihydro-3H,5H-benzo[*c*]pyrazolo[1,2-*a*][1,2]diazepin-3-one (3ee)

Yellow solid (77.7 mg, 83%), mp 95.2-96.4 °C. <sup>1</sup>H NMR (400 MHz, CDCl<sub>3</sub>) δ 0.78 (t, *J* = 7.6 Hz, 6H), 0.88 (t, *J* = 7.2 Hz, 3H), 1.26-1.33 (m, 2H), 1.35-1.43 (m, 2H), 1.50-1.59 (m, 2H), 2.30-2.39 (m, 2H), 2.52 (t, *J* = 6.8 Hz, 2H), 2.76 (t, *J* = 7.2 Hz, 2H), 4.05 (t, *J* = 7.2 Hz, 2H), 5.58 (s, 1H), 7.14-7.21 (m, 3H), 7.42 (d, *J* = 7.6 Hz, 1H). <sup>13</sup>C{<sup>1</sup>H} NMR (100 MHz, CDCl<sub>3</sub>) δ 8.8, 13.9, 22.3, 31.4, 31.7, 33.3, 38.5, 48.0, 69.5, 117.0, 124.9, 127.1, 128.0, 133.6, 134.2, 136.7, 148.6, 171.8. HRMS calcd for C<sub>20</sub>H<sub>29</sub>N<sub>2</sub>O: 313.2274 [M+H]<sup>+</sup>, found: 313.2271.

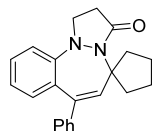

### 7-Phenyl-1,2-dihydro-3H-spiro[benzo[*c*]pyrazolo[1,2-*a*][1,2]diazepine-5,1'-cyclopentan]-3-one (5a)

White solid (67.4 mg, 68%), mp 156.0-157.8 °C. <sup>1</sup>H NMR (400 MHz, CDCl<sub>3</sub>) δ 1.70-1.77 (m, 2H), 1.82-1.97 (m, 4H), 2.59-2.66 (m, 2H), 2.78 (t, *J* = 7.2 Hz, 2H), 4.07 (t, *J* = 7.2 Hz, 2H), 6.15 (s, 1H), 7.00-7.02 (m, 1H), 7.04-7.08 (m, 1H), 7.18-7.21 (m, 2H), 7.24-7.27 (m, 2H), 7.28-7.34 (m, 3H). <sup>13</sup>C{<sup>1</sup>H} NMR (100 MHz, CDCl<sub>3</sub>) δ 24.7, 33.5, 38.2, 48.5, 71.9, 116.8, 124.5, 127.4, 128.0, 128.2, 129.2, 131.9, 133.2, 137.1, 139.4, 144.1, 149.5, 172.3. HRMS calcd for C<sub>22</sub>H<sub>23</sub>N<sub>2</sub>O: 331.1805 [M+H]<sup>+</sup>, found: 331.1803.

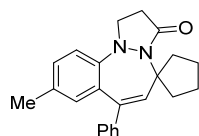

### 9-Methyl-7-phenyl-1,2-dihydro-3H-spiro[benzo[*c*]pyrazolo[1,2-*a*][1,2]diazepine-5,1'-cyclopentan]-3-one (5b)

White solid (64.0 mg, 62%), mp 156.8-157.9 °C. <sup>1</sup>H NMR (400 MHz, CDCl<sub>3</sub>) δ 1.69-1.75 (m, 2H), 1.79-1.85 (m,

2H), 1.89-1.94 (m, 2H), 2.21 (s, 3H), 2.58-2.65(m, 2H), 2.78 (t,  $J = 7.2$  Hz, 2H), 4.04 (t,  $J = 7.2$  Hz, 2H), 6.15 (s, 1H), 6.82 (d,  $J = 1.6$  Hz, 1H), 7.06-7.09 (m, 1H), 7.15 (d,  $J = 8.4$  Hz, 1H), 7.19-7.21 (m, 2H), 7.29-7.34 (m, 3H).  $^{13}\text{C}\{^1\text{H}\}$  NMR (100 MHz,  $\text{CDCl}_3$ )  $\delta$  20.8, 24.6, 33.6, 38.1, 48.4, 71.4, 116.8, 127.4, 128.1, 128.7, 129.1, 132.1, 133.3, 134.1, 137.5, 139.3, 144.0, 147.2, 171.9. HRMS calcd for  $\text{C}_{23}\text{H}_{25}\text{N}_2\text{O}$ : 345.1961  $[\text{M}+\text{H}]^+$ , found: 345.1962.

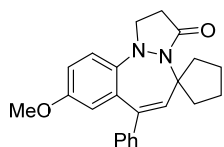

**9-Methyl-7-phenyl-1,2-dihydro-3H-spiro[benzo[*c*]pyrazolo[1,2-*a*][1,2]diazepine-5,1'-cyclopentan]-3-one**

**(5c)**

White solid (64.8 mg, 60%), mp 158.4-159.9 °C.  $^1\text{H}$  NMR (400 MHz,  $\text{CDCl}_3$ )  $\delta$  1.68-1.74 (m, 2H), 1.78-1.83 (m, 2H), 1.90-1.95 (m, 2H), 2.58-2.65 (m, 2H), 2.78 (t,  $J = 7.2$  Hz, 2H), 3.65 (s, 3H), 4.02 (t,  $J = 7.2$  Hz, 2H), 6.18 (s, 1H), 6.55 (d,  $J = 3.2$  Hz, 1H), 6.81 (dd,  $J_1 = 8.4$  Hz,  $J_2 = 2.8$  Hz, 2H), 7.17-7.20 (m, 2H), 7.21-7.23 (m, 2H), 7.28-7.33 (m, 3H).  $^{13}\text{C}\{^1\text{H}\}$  NMR (100 MHz,  $\text{CDCl}_3$ )  $\delta$  24.6, 33.6, 38.0, 48.4, 72.0, 113.4, 116.7, 177.9, 127.5, 128.2, 129.1, 134.8, 137.5, 139.6, 143.1, 143.5, 156.4, 171.7. HRMS calcd for  $\text{C}_{23}\text{H}_{25}\text{N}_2\text{O}_2$ : 361.1911  $[\text{M}+\text{H}]^+$ , found: 361.1909.

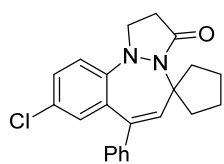

**9-Chloro-7-phenyl-1,2-dihydro-3H-spiro[benzo[*c*]pyrazolo[1,2-*a*][1,2]diazepine-5,1'-cyclopentan]-3-one**

**(5d)**

Brown syrup (71.0 mg, 65%).  $^1\text{H}$  NMR (400 MHz,  $\text{CDCl}_3$ )  $\delta$ : 1.71-1.76 (m, 2H), 1.82-1.97 (m, 2H), 2.58-2.64 (m, 2H), 2.76 (t,  $J = 7.2$  Hz, 2H), 4.03 (t,  $J = 7.2$  Hz, 2H), 6.15 (s, 1H), 6.98 (d,  $J = 2.4$  Hz, 1H), 7.16-7.24 (m, 4H), 7.30-7.36 (m, 3H).  $^{13}\text{C}\{^1\text{H}\}$  NMR (100 MHz,  $\text{CDCl}_3$ )  $\delta$  24.8, 33.2, 38.3, 48.8, 72.2, 118.0, 127.67, 127.73, 128.4, 129.2, 129.9, 131.5, 134.8, 135.8, 140.7, 143.5, 148.2, 172.4. HRMS calcd for  $\text{C}_{22}\text{H}_{22}\text{ClN}_2\text{O}$ : 365.1415



$[M+H]^+$ , found: 365.1411.

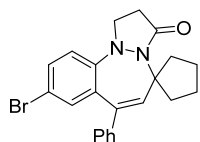

**9-Bromo-7-phenyl-1,2-dihydro-3H-spiro[benzo[*c*]pyrazolo[1,2-*a*][1,2]diazepine-5,1'-cyclopentan]-3-one (5e)**

White solid (77.1 mg, 63%), mp 186.2-187.1 °C.  $^1\text{H}$  NMR (400 MHz,  $\text{CDCl}_3$ )  $\delta$  1.70-1.76 (m, 2H), 1.82-1.95 (m, 4H), 2.58-2.65 (m, 2H), 2.76 (t,  $J = 7.2$  Hz, 2H), 4.03 (t,  $J = 7.2$  Hz, 2H), 6.15(s, 1H), 7.11-7.13 (m, 2H), 7.17-7.19 (m, 2H), 7.31-7.38 (m, 4H).  $^{13}\text{C}\{^1\text{H}\}$  NMR (100 MHz,  $\text{CDCl}_3$ )  $\delta$  24.8, 33.3, 38.3, 48.7, 72.2, 117.6, 118.3, 127.7, 128.4, 129.1, 130.7, 134.4, 135.2, 135.7, 140.8, 143.5, 148.7, 172.4. HRMS calcd for  $\text{C}_{22}\text{H}_{22}\text{BrN}_2\text{O}$ : 409.0910  $[M+H]^+$ , found: 409.0906.

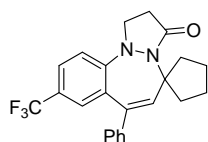

**7-Phenyl-9-(trifluoromethyl)-1,2-dihydro-3H-spiro[benzo[*c*]pyrazolo[1,2-*a*][1,2]diazepine-5,1'-cyclopentan]-3-one (5f)**

White solid (72.9 mg, 61%), mp 171.0-172.7 °C.  $^1\text{H}$  NMR (400 MHz,  $\text{CDCl}_3$ )  $\delta$  1.71-1.80 (m, 2H), 1.88-1.99 (m, 4H), 2.59-2.66 (m, 2H), 2.77 (t,  $J = 7.2$  Hz, 2H), 4.10 (t,  $J = 7.2$  Hz, 2H), 6.17(s, 1H), 7.15-7.19 (m, 2H), 7.26-7.27 (m, 1H), 7.31-7.37 (m, 4H), 7.51 (dd,  $J_1 = 8.4$  Hz,  $J_2 = 1.6$  Hz, 1H).  $^{13}\text{C}\{^1\text{H}\}$  NMR (100 MHz,  $\text{CDCl}_3$ )  $\delta$  24.9, 33.2, 38.5, 49.0, 72.8, 116.7, 123.9 (q,  $^1J_{\text{C-F}} = 270.1$  Hz), 124.6 (q,  $^3J_{\text{C-F}} = 3.6$  Hz), 126.4 (q,  $^2J_{\text{C-F}} = 32.5$  Hz), 127.8, 128.4, 129.1, 129.2 (q,  $^3J_{\text{C-F}} = 4.4$  Hz), 133.2, 135.4, 141.0, 143.6, 152.5, 172.9.  $^{19}\text{F}$  NMR (376 MHz,  $\text{CDCl}_3$ )  $\delta$  -62.40 (s). HRMS calcd for  $\text{C}_{23}\text{H}_{22}\text{F}_3\text{N}_2\text{O}$ : 399.1679  $[M+H]^+$ , found: 399.1671.

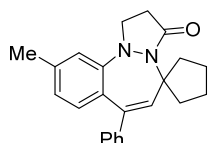

**10-Methyl-7-phenyl-1,2-dihydro-3H-spiro[benzo[*c*]pyrazolo[1,2-*a*][1,2]diazepine-5,1'-cyclopentan]-3-one**

**(5g)**

White solid (74.3 mg, 72%), mp 146.3-147.8 °C.  $^1\text{H}$  NMR (400 MHz,  $\text{CDCl}_3$ )  $\delta$  1.70-1.75 (m, 2H), 1.80-1.96 (m, 4H), 2.39 (s, 3H), 2.58-2.65 (m, 2H), 2.78 (t,  $J = 7.2$  Hz, 2H), 4.06 (t,  $J = 7.2$  Hz, 2H), 6.11 (s, 1H), 6.86-6.91 (m, 2H), 7.04 (s, 1H), 7.18-7.20 (m, 2H), 7.26-7.33 (m, 3H).  $^{13}\text{C}\{^1\text{H}\}$  NMR (100 MHz,  $\text{CDCl}_3$ )  $\delta$  20.8, 24.6, 33.6, 38.1, 48.4, 71.4, 116.8, 127.4, 128.1, 128.7, 129.1, 132.1, 133.3, 134.1, 137.5, 139.3, 144.0, 147.2, 171.9. HRMS calcd for  $\text{C}_{23}\text{H}_{25}\text{N}_2\text{O}$ : 345.1961  $[\text{M}+\text{H}]^+$ , found: 345.1958.

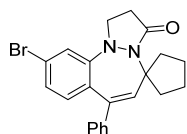**10-Bromo-7-phenyl-1,2-dihydro-3H-spiro[benzo[*c*]pyrazolo[1,2-*a*][1,2]diazepine-5,1'-cyclopentan]-3-one****(5h)**

White solid (85.7 mg, 70%), mp 131.3-133.0 °C.  $^1\text{H}$  NMR (400 MHz,  $\text{CDCl}_3$ )  $\delta$  1.71-1.77 (m, 2H), 1.83-1.97 (m, 4H), 2.58-2.65 (m, 2H), 2.78 (t,  $J = 7.2$  Hz, 2H), 4.04 (t,  $J = 7.2$  Hz, 2H), 6.12 (s, 1H), 6.87 (d,  $J = 8.4$  Hz, 1H), 7.15-7.19 (m, 3H), 7.29-7.34 (m, 3H), 7.36 (d,  $J = 2.0$  Hz, 1H).  $^{13}\text{C}\{^1\text{H}\}$  NMR (100 MHz,  $\text{CDCl}_3$ )  $\delta$  24.8, 33.2, 38.3, 48.8, 72.4, 120.0, 121.2, 127.5, 127.6, 128.3, 129.2, 132.0, 133.3, 135.9, 140.0, 143.8, 150.8, 172.5. HRMS calcd for  $\text{C}_{22}\text{H}_{22}\text{BrN}_2\text{O}$ : 409.0910  $[\text{M}+\text{H}]^+$ , found: 409.0904.

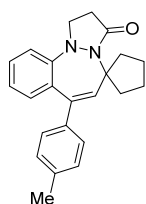**7-(*p*-Tolyl)-1,2-dihydro-3H-spiro[benzo[*c*]pyrazolo[1,2-*a*][1,2]diazepine-5,1'-cyclopentan]-3-one (5i)**

White solid (77.4 mg, 75%), mp 124.2-126.1 °C.  $^1\text{H}$  NMR (400 MHz,  $\text{CDCl}_3$ )  $\delta$  1.68-1.75 (m, 2H), 1.80-1.94 (m, 4H), 2.36 (s, 3H), 2.58-2.65 (m, 2H), 2.78 (t,  $J = 7.2$  Hz, 2H), 4.07 (t,  $J = 7.2$  Hz, 2H), 6.13 (s, 1H), 7.02-7.13 (m, 6H), 7.23-7.27 (m, 2H).  $^{13}\text{C}\{^1\text{H}\}$  NMR (100 MHz,  $\text{CDCl}_3$ )  $\delta$  21.2, 24.7, 33.5, 38.2, 48.5, 71.8, 116.8, 124.5, 128.0, 128.9, 129.0, 131.9, 133.4, 137.0, 137.1, 138.9, 141.2, 149.5, 172.2. HRMS calcd for  $\text{C}_{23}\text{H}_{25}\text{N}_2\text{O}$ :

345.1961 [M+H]<sup>+</sup>, found: 345.1957.

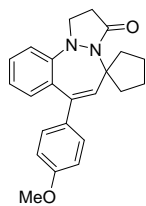

**7-(4-Methoxyphenyl)-1,2-dihydro-3H-spiro[benzo[*c*]pyrazolo[1,2-*a*][1,2]diazepine-5,1'-cyclopentan]-3-one**

**(5j)**

White solid (65.9 mg, 61%), mp 139.1-140.8 °C. <sup>1</sup>H NMR (400 MHz, CDCl<sub>3</sub>) δ 1.68-1.75 (m, 2H), 1.79-1.84 (m, 2H), 1.87-1.96 (m, 2H), 2.58-2.65 (m, 2H), 2.78 (t, *J* = 7.2 Hz, 2H), 3.82 (s, 3H), 4.07 (t, *J* = 7.2 Hz, 2H), 6.14 (s, 1H), 6.83-6.86 (m, 2H), 7.03-7.14 (m, 4H), 7.24-7.29 (m, 2H). <sup>13</sup>C{<sup>1</sup>H} NMR (100 MHz, CDCl<sub>3</sub>) δ 24.6, 33.5, 38.1, 48.4, 55.3, 71.5, 113.5, 116.9, 124.6, 128.0, 130.2, 131.8, 133.6, 136.5, 136.9, 138.4, 149.5, 159.1, 172.0.

HRMS calcd for C<sub>23</sub>H<sub>25</sub>N<sub>2</sub>O<sub>2</sub>: 361.1911 [M+H]<sup>+</sup>, found: 361.1911.

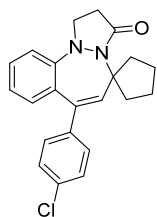

**7-(4-Chlorophenyl)-1,2-dihydro-3H-spiro[benzo[*c*]pyrazolo[1,2-*a*][1,2]diazepine-5,1'-cyclopentan]-3-one**

**(5k)**

White solid (71.2 mg, 65%), mp 152.6-154.3 °C. <sup>1</sup>H NMR (400 MHz, CDCl<sub>3</sub>) δ 1.68-1.75 (m, 2H), 1.81-1.86 (m, 2H), 1.89-1.97 (m, 2H), 2.58-2.65 (m, 2H), 2.78 (t, *J* = 7.2 Hz, 2H), 4.07 (t, *J* = 7.2 Hz, 2H), 6.12 (s, 1H), 6.98 (dd, *J*<sub>1</sub> = 8.0 Hz, *J*<sub>2</sub> = 1.2 Hz, 1H), 7.07 (td, *J*<sub>1</sub> = 8.0 Hz, *J*<sub>2</sub> = 1.6 Hz, 1H), 7.11-7.14 (m, 2H), 7.24-7.29 (m, 4H).

<sup>13</sup>C{<sup>1</sup>H} NMR (100 MHz, CDCl<sub>3</sub>) δ 24.8, 33.4, 38.2, 48.5, 72.0, 116.8, 124.6, 128.2, 128.4, 130.5, 131.8, 132.8, 133.3, 136.0, 139.7, 142.6, 149.6, 172.4. HRMS calcd for C<sub>22</sub>H<sub>22</sub>ClN<sub>2</sub>O: 365.1415 [M+H]<sup>+</sup>, found: 365.1416.

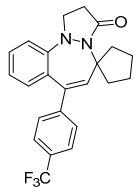

**7-(4-(Trifluoromethyl)phenyl)-1,2-dihydro-3H-spiro[benzo[*c*]pyrazolo[1,2-*a*][1,2]diazepine-5,1'-cyclopentan]-3-one (5l)**

White solid (75.3 mg, 63%), mp 143.9-145.5 °C. <sup>1</sup>H NMR (400 MHz, CDCl<sub>3</sub>) δ 1.71-1.78 (m, 2H), 1.84-1.99 (m, 4H), 2.60-2.67 (m, 2H), 2.79 (t, *J* = 7.2 Hz, 2H), 4.08 (t, *J* = 7.2 Hz, 2H), 6.13 (s, 1H), 6.93-6.95 (m, 1H), 7.05-7.09 (m, 1H), 7.25-7.32 (m, 4H), 7.57 (d, *J* = 8.0 Hz, 2H). <sup>13</sup>C{<sup>1</sup>H} NMR (100 MHz, CDCl<sub>3</sub>) δ 24.8, 33.4, 38.3, 48.7, 72.3, 116.8, 124.2 (q, <sup>1</sup>*J*<sub>C-F</sub> = 270.1 Hz), 124.6, 125.2 (q, <sup>3</sup>*J*<sub>C-F</sub> = 3.7 Hz), 128.3, 129.45 (q, <sup>2</sup>*J*<sub>C-F</sub> = 31.8 Hz), 129.49, 131.8, 132.3, 135.7, 140.7, 147.8, 149.7, 172.7. <sup>19</sup>F NMR (376 MHz, CDCl<sub>3</sub>) δ -62.22 (s). HRMS calcd for C<sub>23</sub>H<sub>22</sub>F<sub>3</sub>N<sub>2</sub>O: 399.1679 [M+H]<sup>+</sup>, found: 399.1674.

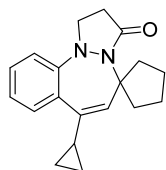

**7-Cyclopropyl-1,2-dihydro-3H-spiro[benzo[*c*]pyrazolo[1,2-*a*][1,2]diazepine-5,1'-cyclopentan]-3-one (5m)**

White solid (63.5 mg, 72%), mp 183.6-184.1 °C. <sup>1</sup>H NMR (400 MHz, CDCl<sub>3</sub>) δ 0.59-0.63 (m, 2H), 0.82-0.87 (m, 2H), 1.58-1.74 (m, 5H), 1.81-1.90 (m, 2H), 2.49-2.56 (m, 2H), 2.73 (t, *J* = 7.2 Hz, 2H), 4.01 (t, *J* = 7.2 Hz, 2H), 5.79 (d, *J* = 0.8 Hz, 1H), 7.16-7.18 (m, 1H), 7.20-7.28 (m, 2H), 7.88 (dd, *J*<sub>1</sub> = 7.6 Hz, *J*<sub>2</sub> = 1.6 Hz, 1H). <sup>13</sup>C{<sup>1</sup>H} NMR (100 MHz, CDCl<sub>3</sub>) δ 7.1, 19.0, 24.7, 33.5, 38.3, 48.6, 71.7, 116.5, 124.6, 127.5, 128.8, 134.0, 134.9, 135.3, 148.4, 172.4. HRMS calcd for C<sub>19</sub>H<sub>23</sub>N<sub>2</sub>O: 295.1805[M+H]<sup>+</sup>, found: 295.1804.

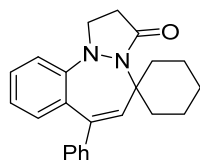

**7-Phenyl-1,2-dihydro-3H-spiro[benzo[*c*]pyrazolo[1,2-*a*][1,2]diazepine-5,1'-cyclohexan]-3-one (7a)**

White solid (89.8 mg, 87%), mp 162.7-164.4 °C. <sup>1</sup>H NMR (400 MHz, CDCl<sub>3</sub>) δ 1.31-1.40 (m, 1H), 1.56-1.74 (m,

7H), 2.63-2.70 (m, 2H), 2.80 (t,  $J = 7.2$  Hz, 2H), 4.04 (t,  $J = 7.2$  Hz, 2H), 6.62 (s, 1H), 7.04 (d,  $J = 7.2$  Hz, 1H), 7.08-7.12 (m, 1H), 7.20-7.22 (m, 2H), 7.28-7.34 (m, 5H).  $^{13}\text{C}\{^1\text{H}\}$  NMR (100 MHz,  $\text{CDCl}_3$ )  $\delta$  23.6, 24.8, 33.5, 34.1, 48.6, 64.8, 120.6, 121.4, 127.8, 128.0, 128.3, 129.0, 132.8, 132.9, 136.1, 137.6, 143.7, 150.7, 171.3. HRMS calcd for  $\text{C}_{23}\text{H}_{25}\text{N}_2\text{O}$ : 345.1961  $[\text{M}+\text{H}]^+$ , found: 345.1952.

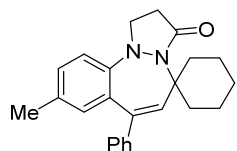

**9-Methyl-7-phenyl-1,2-dihydro-3H-spiro[benzo[c]pyrazolo[1,2-a][1,2]diazepine-5,1'-cyclohexan]-3-one**

**(7b)**

White solid (91.3 mg, 85%), mp 181.4-183.0 °C.  $^1\text{H}$  NMR (400 MHz,  $\text{CDCl}_3$ )  $\delta$  1.30-1.36 (m, 1H), 1.55-1.73 (m, 7H), 2.23 (s, 3H), 2.62-2.68 (m, 2H), 2.79 (t,  $J = 7.6$  Hz, 2H), 4.01 (t,  $J = 7.6$  Hz, 2H), 6.59 (s, 1H), 6.85 (d,  $J = 1.6$  Hz, 1H), 7.09 (dd,  $J_1 = 8.0$  Hz,  $J_2 = 1.6$  Hz, 1H), 7.18 (d,  $J = 8.4$  Hz, 1H), 7.21-7.24 (m, 2H), 7.30-7.35 (m, 3H).  $^{13}\text{C}\{^1\text{H}\}$  NMR (100 MHz,  $\text{CDCl}_3$ )  $\delta$  20.8, 23.7, 24.8, 33.8, 33.9, 48.3, 64.0, 117.1, 127.6, 128.2, 129.0, 131.7, 134.0, 134.5, 135.3, 138.9, 144.0, 147.1, 170.8. HRMS calcd for  $\text{C}_{24}\text{H}_{27}\text{N}_2\text{O}$ : 359.2118  $[\text{M}+\text{H}]^+$ , found: 359.2114.

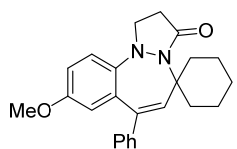

**9-Methoxy-7-phenyl-1,2-dihydro-3H-spiro[benzo[c]pyrazolo[1,2-a][1,2]diazepine-5,1'-cyclohexan]-3-one**

**(7c)**

Light yellow solid (86.4 mg, 77%), mp 176.2-177.9 °C.  $^1\text{H}$  NMR (400 MHz,  $\text{CDCl}_3$ )  $\delta$  1.30-1.37 (m, 1H), 1.54-1.74 (m, 7H), 2.65 (td,  $J_1 = 12.4$  Hz,  $J_2 = 3.6$  Hz, 2H), 2.80 (t,  $J = 7.6$  Hz, 2H), 3.67 (s, 3H), 3.99 (t,  $J = 7.6$  Hz, 2H), 6.58 (d,  $J = 2.8$  Hz, 1H), 6.61 (s, 1H), 6.83 (dd,  $J_1 = 8.4$  Hz,  $J_2 = 2.8$  Hz, 1H), 7.20-7.28 (m, 3H), 7.29-7.34 (m, 3H).  $^{13}\text{C}\{^1\text{H}\}$  NMR (100 MHz,  $\text{CDCl}_3$ )  $\delta$  23.7, 24.8, 33.8, 34.0, 48.4, 55.5, 63.9, 113.7, 116.2, 118.3, 127.7, 128.2, 129.0, 135.4, 135.6, 138.8, 143.0, 143.5, 156.6, 170.7. HRMS calcd for  $\text{C}_{24}\text{H}_{27}\text{N}_2\text{O}_2$ :

375.2067 [M+H]<sup>+</sup>, found: 375.2055.

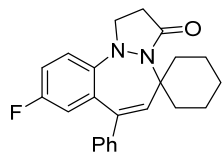

**9-Fluoro-7-phenyl-1,2-dihydro-3H-spiro[benzo[*c*]pyrazolo[1,2-*a*][1,2]diazepine-5,1'-cyclohexan]-3-one**

**(7d)**

White solid (79.3 mg, 73%), mp 175.3-176.1 °C. <sup>1</sup>H NMR (400 MHz, CDCl<sub>3</sub>) δ 1.30-1.39 (m, 1H), 1.54-1.75 (m, 7H), 2.63-2.69 (m, 2H), 2.80 (t, *J* = 7.2 Hz, 2H), 4.01 (t, *J* = 7.2 Hz, 2H), 6.65 (s, 1H), 6.75 (dd, *J*<sub>1</sub> = 9.6 Hz, *J*<sub>2</sub> = 2.8 Hz, 1H), 6.96-7.01 (m, 1H), 7.20-7.26 (m, 3H), 7.31-7.36 (m, 3H). <sup>13</sup>C {<sup>1</sup>H} NMR (100 MHz, CDCl<sub>3</sub>) δ 23.6, 24.8, 33.8, 34.0, 48.7, 64.4, 114.9 (d, <sup>2</sup>*J*<sub>C-F</sub> = 22.4 Hz), 117.7 (d, <sup>2</sup>*J*<sub>C-F</sub> = 22.4 Hz), 118.6 (d, <sup>3</sup>*J*<sub>C-F</sub> = 8.7 Hz), 127.8, 128.4, 129.0, 136.0 (d, <sup>3</sup>*J*<sub>C-F</sub> = 8.0 Hz), 136.5, 137.8 (d, <sup>4</sup>*J*<sub>C-F</sub> = 2.1 Hz), 143.3, 145.7 (d, <sup>4</sup>*J*<sub>C-F</sub> = 2.2 Hz), 159.7 (d, <sup>1</sup>*J*<sub>C-F</sub> = 242.7 Hz), 171.1. <sup>19</sup>F NMR (376 MHz, CDCl<sub>3</sub>) δ -117.32 – -117.26 (m). HRMS calcd for C<sub>23</sub>H<sub>24</sub>FN<sub>2</sub>O: 363.1867 [M+H]<sup>+</sup>, found: 363.1861.

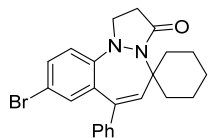

**9-Bromo-7-phenyl-1,2-dihydro-3H-spiro[benzo[*c*]pyrazolo[1,2-*a*][1,2]diazepine-5,1'-cyclohexan]-3-one**

**(7e)**

Light yellow solid (95.0 mg, 75%), mp 214.3-215.5 °C. <sup>1</sup>H NMR (400 MHz, CDCl<sub>3</sub>) δ 1.32-1.39 (m, 1H), 1.54-1.76 (m, 7H), 2.62-2.69 (m, 2H), 2.78 (t, *J* = 7.2 Hz, 2H), 4.00 (t, *J* = 7.2 Hz, 2H), 6.64 (s, 1H), 7.15-7.17 (m, 2H), 7.18-7.21 (m, 2H), 7.32-7.36 (m, 3H), 7.39 (dd, *J*<sub>1</sub> = 8.4 Hz, *J*<sub>2</sub> = 2.4 Hz, 1H). <sup>13</sup>C {<sup>1</sup>H} NMR (100 MHz, CDCl<sub>3</sub>) δ 23.6, 24.8, 33.6, 34.0, 48.6, 64.6, 118.0, 118.9, 127.9, 128.4, 129.0, 131.0, 134.0, 136.0, 136.8, 137.4, 143.4, 148.6, 171.2. HRMS calcd for C<sub>23</sub>H<sub>24</sub>BrN<sub>2</sub>O: 423.1067 [M+H]<sup>+</sup>, found: 423.1066.

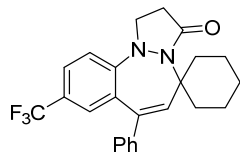

**7-Phenyl-9-(trifluoromethyl)-1,2-dihydro-3H-spiro[benzo[c]pyrazolo[1,2-a][1,2]diazepine-5,1'-cyclohexan]-3-one (7f)**

White solid (103.9 mg, 84%), mp 202.3-203.2 °C. <sup>1</sup>H NMR (400 MHz, CDCl<sub>3</sub>) δ 1.32-1.42 (m, 1H), 1.56-1.75 (m, 7H), 2.64-2.72 (m, 2H), 2.79 (t, *J* = 7.6 Hz, 2H), 4.07 (t, *J* = 7.6 Hz, 2H), 6.70 (s, 1H), 7.16-7.20 (m, 2H), 7.30-7.38 (m, 5H), 7.54 (dd, *J*<sub>1</sub> = 8.4 Hz, *J*<sub>2</sub> = 1.6 Hz, 1H). <sup>13</sup>C{<sup>1</sup>H} NMR (100 MHz, CDCl<sub>3</sub>) δ 23.5, 24.8, 33.5, 34.2, 48.8, 65.1, 117.4, 123.9 (q, <sup>1</sup>*J*<sub>C-F</sub> = 270.1 Hz), 125.0 (q, <sup>3</sup>*J*<sub>C-F</sub> = 3.6 Hz), 126.9 (q, <sup>1</sup>*J*<sub>C-F</sub> = 32.5 Hz), 128.0, 128.5, 128.7 (q, <sup>3</sup>*J*<sub>C-F</sub> = 3.6 Hz), 129.0, 134.1, 137.2, 143.6, 152.3, 171.6. <sup>19</sup>F NMR (376 MHz, CDCl<sub>3</sub>) δ -62.22 (s). HRMS calcd for C<sub>24</sub>H<sub>24</sub>F<sub>3</sub>N<sub>2</sub>O: 413.1835 [M+H]<sup>+</sup>, found: 413.1829.

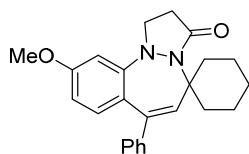

**10-Methoxy-7-phenyl-1,2-dihydro-3H-spiro[benzo[c]pyrazolo[1,2-a][1,2]diazepine-5,1'-cyclohexan]-3-one (7g)**

White solid (79.7 mg, 71%), mp 167.6-168.9 °C. <sup>1</sup>H NMR (400 MHz, CDCl<sub>3</sub>) δ 1.34-1.40 (m, 1H), 1.59-1.73 (m, 7H), 2.65 (td, *J*<sub>1</sub> = 13.2 Hz, *J*<sub>2</sub> = 4.0 Hz, 2H), 2.79 (t, *J* = 7.6 Hz, 2H), 3.84 (s, 3H), 4.01 (t, *J* = 7.2 Hz, 2H), 6.49 (s, 1H), 6.65 (dd, *J*<sub>1</sub> = 8.8 Hz, *J*<sub>2</sub> = 2.4 Hz, 1H), 6.81 (d, *J* = 2.4 Hz, 1H), 6.96 (d, *J* = 8.4 Hz, 1H), 7.20-7.23 (m, 2H), 7.29-7.34 (m, 3H). <sup>13</sup>C{<sup>1</sup>H} NMR (100 MHz, CDCl<sub>3</sub>) δ 23.6, 24.8, 33.6, 33.9, 48.5, 55.5, 64.4, 104.5, 109.1, 126.7, 127.5, 128.2, 129.0, 132.6, 133.7, 138.4, 144.2, 150.7, 159.4, 171.1. HRMS calcd for C<sub>24</sub>H<sub>27</sub>N<sub>2</sub>O<sub>2</sub>: 375.2067 [M+H]<sup>+</sup>, found: 375.2060.

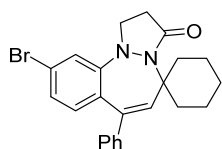

**10-Bromo-7-phenyl-1,2-dihydro-3H-spiro[benzo[c]pyrazolo[1,2-a][1,2]diazepine-5,1'-cyclohexan]-3-one**

**(7h)**

White solid (103.8 mg, 82%), mp 157.8-159.4 °C.  $^1\text{H}$  NMR (400 MHz,  $\text{CDCl}_3$ )  $\delta$  1.33-1.39 (m, 1H), 1.54-1.75 (m, 7H), 2.66 (td,  $J_1 = 13.6$  Hz,  $J_2 = 4.8$  Hz, 2H), 2.79 (t,  $J = 7.2$  Hz, 2H), 4.01 (t,  $J = 7.2$  Hz, 2H), 6.62 (s, 1H), 6.91 (d,  $J = 8.4$  Hz, 1H), 7.17-7.19 (m, 2H), 7.22 (dd,  $J_1 = 8.4$  Hz,  $J_2 = 1.6$  Hz, 1H), 7.31-7.34 (m, 3H), 7.40 (d,  $J = 1.6$  Hz, 1H).  $^{13}\text{C}\{^1\text{H}\}$  NMR (100 MHz,  $\text{CDCl}_3$ )  $\delta$  23.6, 24.8, 33.5, 34.1, 48.6, 64.8, 120.6, 121.4, 127.8, 128.0, 128.3, 129.0, 132.8, 132.9, 136.1, 137.6, 143.7, 150.7, 171.3. HRMS calcd for  $\text{C}_{23}\text{H}_{24}\text{BrN}_2\text{O}$ : 423.1067  $[\text{M}+\text{H}]^+$ , found: 423.1062.

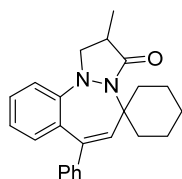**2-Methyl-7-phenyl-1,2-dihydro-3H-spiro[benzo[*c*]pyrazolo[1,2-*a*][1,2]diazepine-5,1'-cyclohexan]-3-one (7i)**

White solid (79.5 mg, 74%), mp 141.3-143.0 °C.  $^1\text{H}$  NMR (400 MHz,  $\text{CDCl}_3$ )  $\delta$  1.24 (d,  $J = 6.8$  Hz, 3H), 1.32-1.82 (m, 7H), 1.97 (d,  $J = 12.8$  Hz, 1H), 2.51 (td,  $J_1 = 13.2$  Hz,  $J_2 = 4.8$  Hz, 1H), 2.82 (td,  $J_1 = 13.2$  Hz,  $J_2 = 4.4$  Hz, 1H), 3.14-3.23 (m, 1H), 3.50 (t,  $J = 12.8$  Hz, 1H), 4.27-4.32 (m, 1H), 6.61 (s, 1H), 7.02-7.10 (m, 2H), 7.20-7.22 (m, 2H), 7.25-7.33 (m, 5H).  $^{13}\text{C}\{^1\text{H}\}$  NMR (100 MHz,  $\text{CDCl}_3$ )  $\delta$  13.8, 23.4, 23.8, 24.9, 33.2, 34.7, 37.4, 56.3, 64.5, 117.4, 124.7, 127.5, 128.1, 128.2, 129.1, 131.6, 133.9, 135.5, 138.5, 144.2, 149.5, 173.8. HRMS calcd for  $\text{C}_{24}\text{H}_{27}\text{N}_2\text{O}$ : 359.2118  $[\text{M}+\text{H}]^+$ , found: 359.2118.

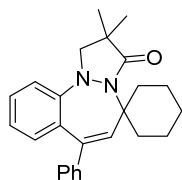**2,2-Dimethyl-7-phenyl-1,2-dihydro-3H-spiro[benzo[*c*]pyrazolo[1,2-*a*][1,2]diazepine-5,1'-cyclohexan]-3-one (7j)****(7j)**

White solid (89.3 mg, 80%), mp 139.8-141.6 °C.  $^1\text{H}$  NMR (400 MHz,  $\text{CDCl}_3$ )  $\delta$  1.27 (s, 6H), 1.41-1.47 (m, 1H), 1.54-1.72 (m, 7H), 2.65-2.71 (m, 2H), 3.92 (s, 2H), 6.43 (s, 1H), 6.89-6.97 (m, 2H), 7.17-7.19 (m, 2H), 7.21-7.22



(m, 2H), 7.28-7.33 (m, 3H).  $^{13}\text{C}\{^1\text{H}\}$  NMR (100 MHz,  $\text{CDCl}_3$ )  $\delta$  23.1, 24.5, 25.2, 33.8, 42.8, 62.2, 63.3, 118.5, 122.7, 127.3, 127.9, 128.2, 129.0, 131.0, 132.4, 136.6, 139.6, 144.5, 150.5, 176.1. HRMS calcd for  $\text{C}_{25}\text{H}_{29}\text{N}_2\text{O}$ : 373.2274  $[\text{M}+\text{H}]^+$ , found: 373.2269.

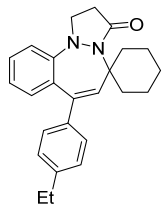

**7-(4-Ethylphenyl)-1,2-dihydro-3H-spiro[benzo[*c*]pyrazolo[1,2-*a*][1,2]diazepine-5,1'-cyclohexan]-3-one (7k)**

White solid (99.4 mg, 89%), mp 133.6-134.9 °C.  $^1\text{H}$  NMR (400 MHz,  $\text{CDCl}_3$ )  $\delta$  1.25 (t,  $J = 7.6$  Hz, 3H), 1.32-1.37 (m, 1H), 1.58-1.72 (m, 7H), 2.62-2.69 (m, 4H), 2.80 (t,  $J = 7.2$  Hz, 2H), 4.04 (t,  $J = 7.6$  Hz, 2H), 6.60 (s, 1H), 7.06-7.16 (m, 6H), 7.27-7.29 (m, 2H).  $^{13}\text{C}\{^1\text{H}\}$  NMR (100 MHz,  $\text{CDCl}_3$ )  $\delta$  15.6, 23.6, 24.8, 28.6, 33.8, 33.9, 48.4, 64.3, 117.2, 124.8, 127.7, 128.2, 129.0, 131.6, 134.2, 134.9, 138.5, 141.4, 143.7, 149.4, 171.1. HRMS calcd for  $\text{C}_{25}\text{H}_{29}\text{N}_2\text{O}$ : 373.2274  $[\text{M}+\text{H}]^+$ , found: 373.2271.

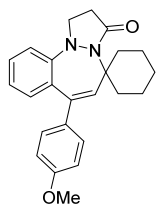

**7-(4-Methoxyphenyl)-1,2-dihydro-3H-spiro[benzo[*c*]pyrazolo[1,2-*a*][1,2]diazepine-5,1'-cyclohexan]-3-one (7l)**

Yellow syrup (86.6 mg, 77%).  $^1\text{H}$  NMR (400 MHz,  $\text{CDCl}_3$ )  $\delta$  1.32-1.38 (m, 1H), 1.54-1.73 (m, 7H), 2.62-2.68 (m, 2 H), 2.80 (t,  $J = 7.6$  Hz, 2H), 3.81 (s, 3H), 4.03 (t,  $J = 7.6$  Hz, 2H), 6.57 (s, 1H), 6.83-6.87 (m, 2H), 7.06-7.11 (m, 2H), 7.12-7.16 (m, 2H), 7.26-7.28 (m, 2H).  $^{13}\text{C}\{^1\text{H}\}$  NMR (100 MHz,  $\text{CDCl}_3$ )  $\delta$  23.7, 24.8, 33.8, 33.9, 48.3, 55.3, 64.2, 113.6, 117.2, 124.9, 128.3, 130.1, 131.5, 134.2, 134.3, 136.5, 138.3, 149.4, 159.3, 171.0. HRMS calcd for  $\text{C}_{24}\text{H}_{27}\text{N}_2\text{O}_2$ : 375.2067  $[\text{M}+\text{H}]^+$ , found: 375.2059.

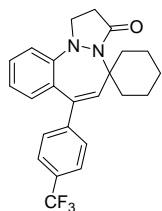

**7-(4-(Trifluoromethyl)phenyl)-1,2-dihydro-3H-spiro[benzo[*c*]pyrazolo[1,2-*a*][1,2]diazepine-5,1'-cyclohexan]-3-one (7m)**

Yellow solid (101.4 mg, 82%), mp 178.4-179.2 °C. <sup>1</sup>H NMR (400 MHz, CDCl<sub>3</sub>) δ 1.31-1.41 (m, 1H), 1.53-1.64 (m, 2H), 1.69-1.76 (m, 5H), 2.68 (td, *J*<sub>1</sub> = 13.2 Hz, *J*<sub>2</sub> = 4.4 Hz, 2H), 2.81 (t, *J* = 7.2 Hz, 2H), 4.05 (t, *J* = 7.2 Hz, 2H), 6.64 (s, 1H), 6.97-6.99 (m, 1H), 7.09-7.13 (m, 1H), 7.29-7.33 (m, 4H), 7.58 (d, *J* = 8.0 Hz, 2H). <sup>13</sup>C{<sup>1</sup>H} NMR (100 MHz, CDCl<sub>3</sub>) δ 23.6, 24.8, 33.7, 33.9, 48.5, 64.6, 117.3, 124.2 (q, <sup>1</sup>*J*<sub>C-F</sub> = 270.2 Hz), 125.0, 125.2 (q, <sup>3</sup>*J*<sub>C-F</sub> = 3.6 Hz), 128.6, 129.3, 129.6 (q, <sup>2</sup>*J*<sub>C-F</sub> = 32.5 Hz), 131.3, 133.2, 136.9, 137.4, 147.7, 149.5, 171.4. <sup>19</sup>F NMR (376 MHz, CDCl<sub>3</sub>) δ -62.42 (s). HRMS calcd for C<sub>24</sub>H<sub>24</sub>F<sub>3</sub>N<sub>2</sub>O: 413.1835 [M+H]<sup>+</sup>, found: 413.1833.

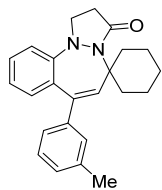

**7-(*m*-Tolyl)-1,2-dihydro-3H-spiro[benzo[*c*]pyrazolo[1,2-*a*][1,2]diazepine-5,1'-cyclohexan]-3-one (7n)**

Light yellow solid (92.4 mg, 86%), mp 163.0-164.7 °C. <sup>1</sup>H NMR (400 MHz, CDCl<sub>3</sub>) δ 1.33-1.38 (m, 1H), 1.55-1.74 (m, 7H), 2.33(s, 3H), 2.62-2.70 (m, 2H), 2.80 (t, *J* = 7.2 Hz, 2H), 4.04 (t, *J* = 7.6 Hz, 2H), 6.59 (s, 1H), 6.99-7.05 (m, 3H), 7.08-7.12 (m, 2H), 7.21 (t, *J* = 7.2 Hz, 1H), 7.26-7.29 (m, 2H). <sup>13</sup>C{<sup>1</sup>H} NMR (100 MHz, CDCl<sub>3</sub>) δ 21.5, 23.6, 24.8, 33.8, 33.9, 48.4, 64.3, 117.2, 124.9, 126.2, 128.1, 128.2, 128.3, 129.7, 131.6, 134.1, 135.2, 137.8, 138.7, 144.1, 149.4, 171.2. HRMS calcd for C<sub>24</sub>H<sub>27</sub>N<sub>2</sub>O: 359.2118 [M+H]<sup>+</sup>, found: 359.2114.

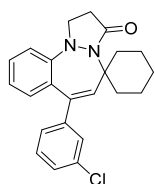

**7-(3-Chlorophenyl)-1,2-dihydro-3H-spiro[benzo[*c*]pyrazolo[1,2-*a*][1,2]diazepine-5,1'-cyclohexan]-3-one**

**(7o)**

White solid (99.8 mg, 88%), mp 157.8-159.3 °C.  $^1\text{H}$  NMR (400 MHz,  $\text{CDCl}_3$ )  $\delta$  1.33-1.40 (m, 1H), 1.53-1.63 (m, 2H), 1.68-1.75 (m, 5H), 2.63-2.69 (m, 2H), 2.80 (t,  $J = 7.6$  Hz, 2H), 4.04 (t,  $J = 7.6$  Hz, 2H), 6.60 (s, 1H), 7.02 (d,  $J = 7.2$  Hz, 1H), 7.08-7.14 (m, 2H), 7.18 (d,  $J = 1.6$  Hz, 1H), 7.23-7.32 (m, 4H).  $^{13}\text{C}\{^1\text{H}\}$  NMR (100 MHz,  $\text{CDCl}_3$ )  $\delta$  23.6, 24.8, 33.7, 33.9, 48.5, 64.4, 117.3, 125.0, 127.3, 127.7, 128.6, 129.0, 129.5, 131.4, 133.3, 134.1, 136.3, 137.4, 145.9, 149.5, 171.3. HRMS calcd for  $\text{C}_{23}\text{H}_{24}\text{ClN}_2\text{O}$ : 379.1572  $[\text{M}+\text{H}]^+$ , found: 379.1572.

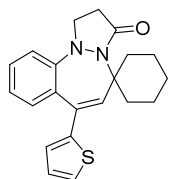

**7-(Thiophen-2-yl)-1,2-dihydro-3H-spiro[benzo[*c*]pyrazolo[1,2-*a*][1,2]diazepine-5,1'-cyclohexan]-3-one (7p)**

White solid (85.4 mg, 81%), mp 153.8-154.5 °C.  $^1\text{H}$  NMR (400 MHz,  $\text{CDCl}_3$ )  $\delta$  1.26-1.38 (m, 1H), 1.50-1.72 (m, 7H), 2.63 (td,  $J_1 = 12.4$  Hz,  $J_2 = 4.0$  Hz, 2H), 2.80 (t,  $J = 7.6$  Hz, 2H), 4.02 (t,  $J = 7.6$  Hz, 2H), 6.80 (s, 1H), 6.86 (dd,  $J_1 = 3.2$  Hz,  $J_2 = 0.8$  Hz, 1H), 6.97 (dd,  $J_1 = 5.2$  Hz,  $J_2 = 3.6$  Hz, 1H), 7.16-7.20 (m, 1H), 7.23 (dd,  $J_1 = 5.2$  Hz,  $J_2 = 1.2$  Hz, 1H), 7.27-7.29 (m, 1H), 7.31-7.35 (m, 1H), 7.41 (dd,  $J_1 = 8.0$  Hz,  $J_2 = 1.6$  Hz, 1H).  $^{13}\text{C}\{^1\text{H}\}$  NMR (100 MHz,  $\text{CDCl}_3$ )  $\delta$  23.6, 24.7, 33.7, 33.8, 48.2, 64.0, 117.4, 125.0, 125.1, 126.6, 127.2, 128.8, 131.2, 132.1, 133.4, 134.8, 146.5, 149.1, 170.7. HRMS calcd for  $\text{C}_{21}\text{H}_{23}\text{N}_2\text{OS}$ : 351.1526  $[\text{M}+\text{H}]^+$ , found: 351.1523.

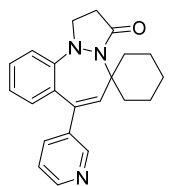

**7-(Pyridin-3-yl)-1,2-dihydro-3H-spiro[benzo[*c*]pyrazolo[1,2-*a*][1,2]diazepine-5,1'-cyclohexan]-3-one (7q)**

White solid (86.9 mg, 84%), mp 138.2-139.1 °C.  $^1\text{H}$  NMR (400 MHz,  $\text{CDCl}_3$ )  $\delta$  1.34-1.41 (m, 1H), 1.54-1.65 (m, 2H), 1.73-1.76 (m, 5H), 2.68 (td,  $J_1 = 12.8$  Hz,  $J_2 = 4.0$  Hz, 2H), 2.81 (t,  $J = 7.6$  Hz, 2H), 4.06 (t,  $J = 7.6$  Hz, 2H), 6.65 (s, 1H), 7.00-7.01 (m, 1H), 7.10-7.14 (m, 1H), 7.23-7.28 (m, 1H), 7.31-7.33 (m, 2H), 7.47 (dt,  $J_1 = 8.0$  Hz,  $J_2 = 2.0$  Hz, 1H), 8.55-8.57 (m, 2H).  $^{13}\text{C}\{^1\text{H}\}$  NMR (100 MHz,  $\text{CDCl}_3$ )  $\delta$  23.6, 24.7, 33.7, 34.0, 48.6, 64.7, 117.3,

123.1, 125.1, 128.7, 131.1, 133.0, 135.3, 136.3, 136.9, 139.7, 148.8, 149.5, 149.8, 171.5. HRMS calcd for  $C_{22}H_{24}N_3O$ : 346.1914  $[M+H]^+$ , found: 346.1908.

## 2. Structural elaborations of 3a

### 2.1. Synthesis of 8 from 3a

To a solution of **3a** (60.8 mg, 0.2 mmol) in MeOH/DCM (2 mL, 10/3) was added Pd/C (10 wt%, 10 mg). The mixture was stirred at room temperature under  $H_2$  (balloon, 1 atm) for 24 h. Upon completion, it was filtered through a pad of celite and concentrated under reduced pressure. The residue was purified by silica gel chromatography using petroleum ether/ethyl acetate (3:1) as eluent to afford **8** (58.2 mg, 95%).

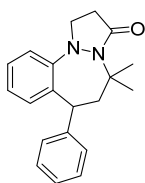

### 5,5-Dimethyl-7-phenyl-1,2,6,7-tetrahydro-3H,5H-benzo[*c*]pyrazolo[1,2-*a*][1,2]diazepin-3-one (**8**)

White solid (58.2 mg, 95%), mp 101.1-102.4 °C.  $^1H$  NMR (400 MHz,  $CDCl_3$ )  $\delta$  1.53 (s, 3H), 1.65 (s, 3H), 1.78 (dd,  $J_1 = 14.4$  Hz,  $J_2 = 4.4$  Hz, 1H), 2.42-2.49 (m, 1H), 2.83-2.95 (m, 2H), 3.78-3.86 (m, 1H), 4.12 (ddd,  $J_1 = 12.8$  Hz,  $J_2 = 7.2$  Hz,  $J_3 = 2.8$  Hz, 1H), 4.42 (dd,  $J_1 = 12.4$  Hz,  $J_2 = 4.0$  Hz, 1H), 6.83 (d,  $J = 7.6$  Hz, 1H), 6.89-6.92 (m, 1H), 7.07-7.11 (m, 2H), 7.14-7.21 (m, 3H), 7.27-7.30 (m, 2H).  $^{13}C\{^1H\}$  NMR (100 MHz,  $CDCl_3$ )  $\delta$  24.3, 27.2, 33.5, 46.9, 48.6, 48.7, 60.0, 116.4, 124.4, 126.3, 126.7, 128.3, 128.7, 132.6, 136.2, 147.7, 149.3, 173.4. HRMS calcd for  $C_{20}H_{23}N_2O$ : 307.1805  $[M+H]^+$ , found: 307.1805.

### 2.2. Synthesis of 9 from 3a

To a solution of **3a** (60.8 mg, 0.2mmol) in THF (5 mL) was added  $LiAlH_4$  (0.4 mL, 1M) at 0 °C. It was then stirred at room temperature for 2 h. Upon completion, it was quenched with water, concentrated and extracted with EtOAc. The combined organic layers were dried over anhydrous  $Na_2SO_4$ , and then concentrated under reduced pressure. The residue was purified by silica gel chromatography using petroleum ether/ethyl acetate (3:1)

as eluent to afford **9** (33.9 mg, 55%).

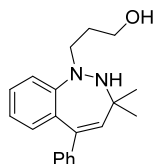

### 3-(3,3-Dimethyl-5-phenyl-2,3-dihydro-1H-benzo[*c*][1,2]diazepin-1-yl)propan-1-ol (**9**)

Yellowish syrup (33.9 mg, 55%),  $^1\text{H}$  NMR (400 MHz,  $\text{CDCl}_3$ )  $\delta$  1.35 (s, 6H), 1.95-2.01 (m, 2H), 3.61-3.64 (m, 4H), 3.80 (t,  $J = 5.6$  Hz, 2H), 6.08 (s, 1H), 6.87 (td,  $J_1 = 7.2$  Hz,  $J_2 = 0.8$  Hz, 1H), 6.92 (dd,  $J_1 = 8.0$  Hz,  $J_2 = 1.6$  Hz, 1H), 7.04 (d,  $J = 7.6$  Hz, 1H), 7.13-7.18 (m, 3H), 7.25-7.33 (m, 3H).  $^{13}\text{C}\{^1\text{H}\}$  NMR (100 MHz,  $\text{CDCl}_3$ )  $\delta$  27.8, 30.2, 54.4, 61.5, 62.8, 115.4, 122.3, 126.8, 127.2, 128.0, 129.5, 130.5, 133.3, 136.2, 143.6, 146.0, 151.8. HRMS calcd for  $\text{C}_{20}\text{H}_{25}\text{N}_2\text{O}$ : 309.1961  $[\text{M}+\text{H}]^+$ , found: 309.1962.

### 2.3. Gram-scale synthesis of **3a**

To a reaction tube equipped with a stir bar were charged with 1-phenylpyrazolidin-3-one (**1a**, 814 mg, 5 mmol), toluene (20 mL),  $[\text{RhCp}^*\text{Cl}_2]_2$  (31 mg, 0.05 mmol),  $\text{Zn}(\text{OAc})_2$  (460 mg, 2.5 mmol), NaOAc (205 mg, 2.5 mmol) and 2-methyl-4-phenylbut-3-yn-2-ol (**2a**, 801 mg, 5 mmol). The mixture was stirred at 100 °C (oil bath) for 10 h under air. Upon completion, it was cooled to room temperature, filtered through a pad of celite and concentrated under reduced pressure. The residue was purified by silica gel chromatography using petroleum ether/ethyl acetate (3:1) as eluent to afford **3a** (1.16 g, 76%).

### III. Mechanism studies

#### (1) H/D exchange experiments

To a reaction tube equipped with a stir bar were charged with 1-phenylpyrazolidin-3-one (**1a**, 32.4 mg, 0.2 mmol), toluene (2 mL), CD<sub>3</sub>OD (0.08 mL, 2 mmol), [RhCp\*Cl<sub>2</sub>]<sub>2</sub> (3.1 mg, 0.005 mmol), Zn(OAc)<sub>2</sub> (18.3 mg, 0.1 mmol) and NaOAc (8.2 mg, 0.1 mmol). The mixture was stirred at 100 °C (oil bath) for 30 min under air. The resulting mixture was cooled to room temperature, concentrated under reduced pressure. The residue was purified by silica gel chromatography using petroleum ether/ethyl acetate (1:1) as eluent to give **1a-d<sub>n</sub>**. Upon analyzing the <sup>1</sup>H NMR spectrum of the product, the deuteration percentage was determined as 50%.

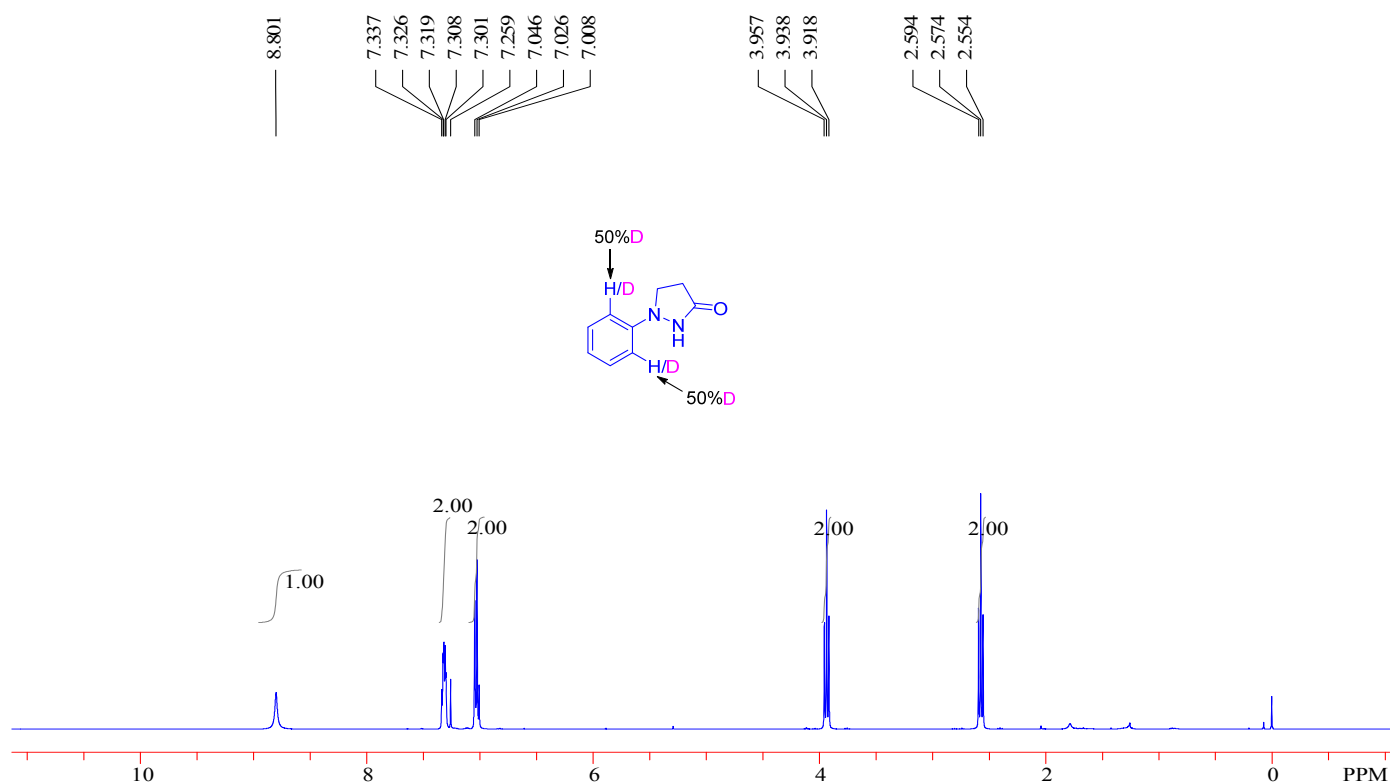

To a reaction tube equipped with a stir bar were charged with 1-phenylpyrazolidin-3-one (**1a**, 48.7 mg, 0.3 mmol), toluene (2 mL), CD<sub>3</sub>OD (0.12 mL, 3 mmol), [RhCp\*Cl<sub>2</sub>]<sub>2</sub> (4.7 mg, 0.0075 mmol), Zn(OAc)<sub>2</sub> (27.5 mg, 0.15 mmol), NaOAc (12.3 mg, 0.15 mmol) and 1-(phenylethynyl)cyclopentan-1-ol (**4a**, 55.8 mg, 0.3 mmol). The mixture was stirred at 100 °C (oil bath) for 30 min under air. The resulting mixture was cooled to room temperature, filtered through a pad of celite and concentrated under reduced pressure. The residue was purified

by silica gel chromatography using petroleum ether/ethyl acetate (3:1) as eluent to give **5a-d<sub>n</sub>**. Upon analyzing the <sup>1</sup>H NMR spectrum of the product, the deuteration percentage was determined as 20%.

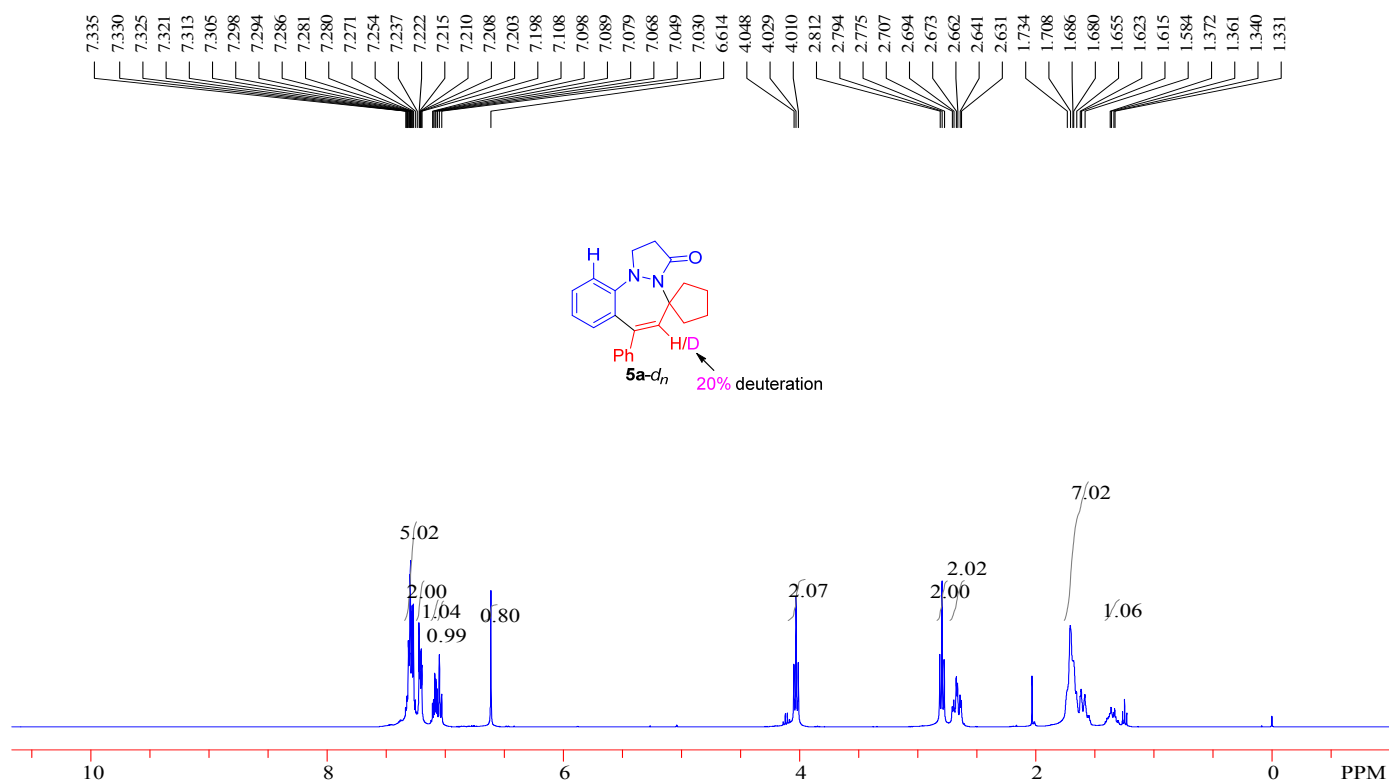

## (2) Competition experiment between **1c** and **1g**

To a reaction tube equipped with a stir bar were charged with 1-(4-methoxyphenyl)pyrazolidin-3-one (**1c**, 57.6 mg, 0.3 mmol), 1-(4-(trifluoromethyl)phenyl)pyrazolidin-3-one (**1g**, 69.0 mg, 0.3 mmol), 2-methyl-4-phenylbut-3-yn-2-ol (**2a**, 48.1 mg, 0.3 mmol), [Cp\*<sub>2</sub>RhCl<sub>2</sub>]<sub>2</sub> (4.7 mg, 0.0075 mmol), Zn(OAc)<sub>2</sub> (27.5 mg, 0.15 mmol), NaOAc (12.3 mg, 0.15 mmol) and toluene (2 mL). The mixture was stirred at 100 °C (oil bath) for 4 h. The resulting mixture was cooled to room temperature, filtered through a pad of celite and concentrated under reduced pressure. The residue was purified by silica gel chromatography using petroleum ether/ethyl acetate (3:1) as eluent to afford **3c** (12.0 mg, 12%) and **3g** (81.4 mg, 73%).

#### IV. Copies of NMR spectra of 3a-3ee

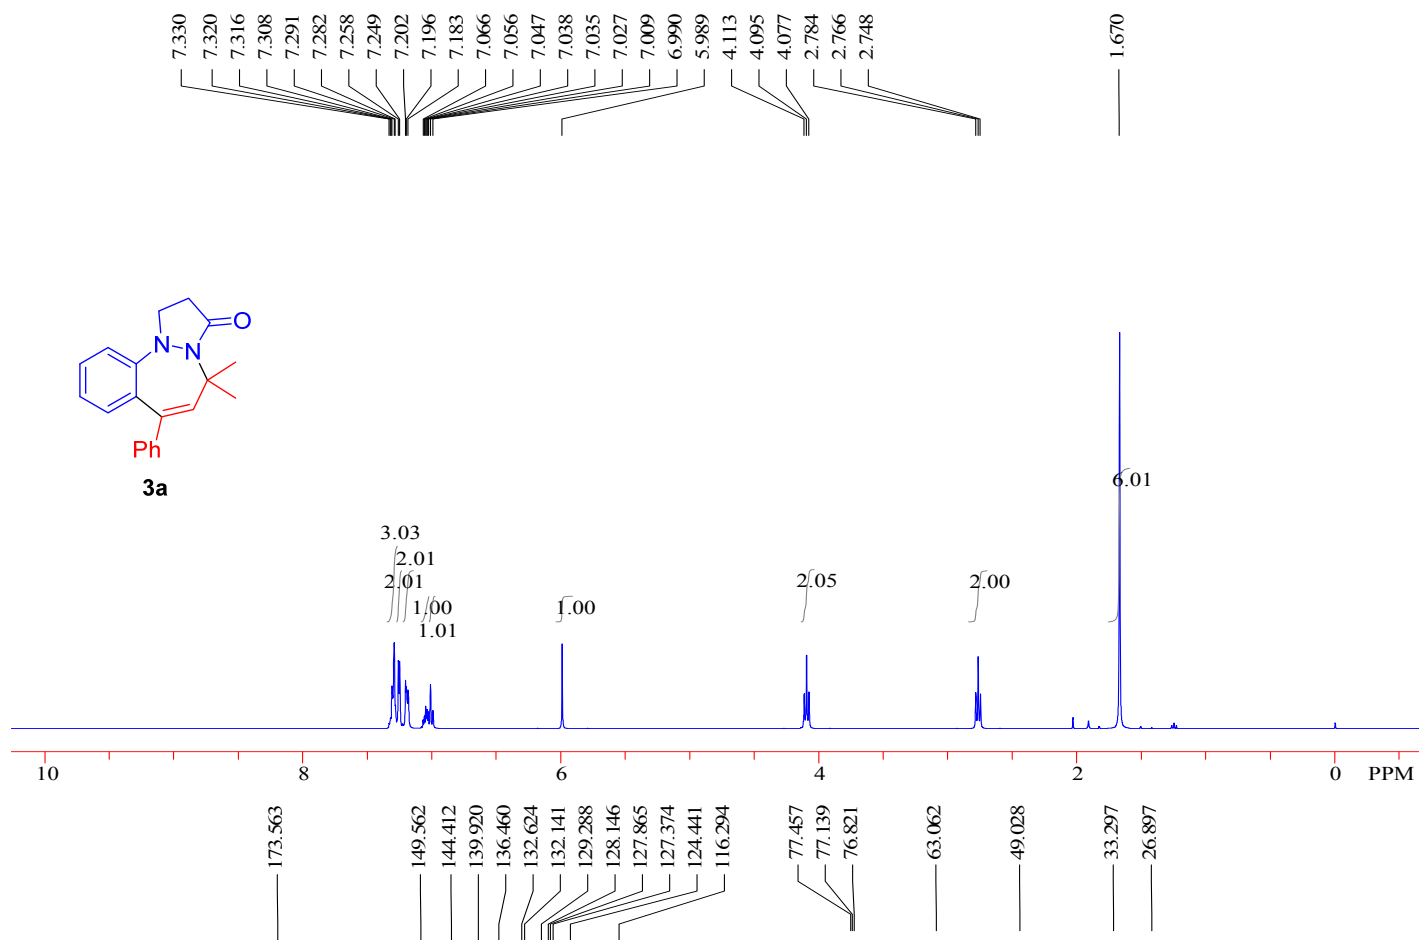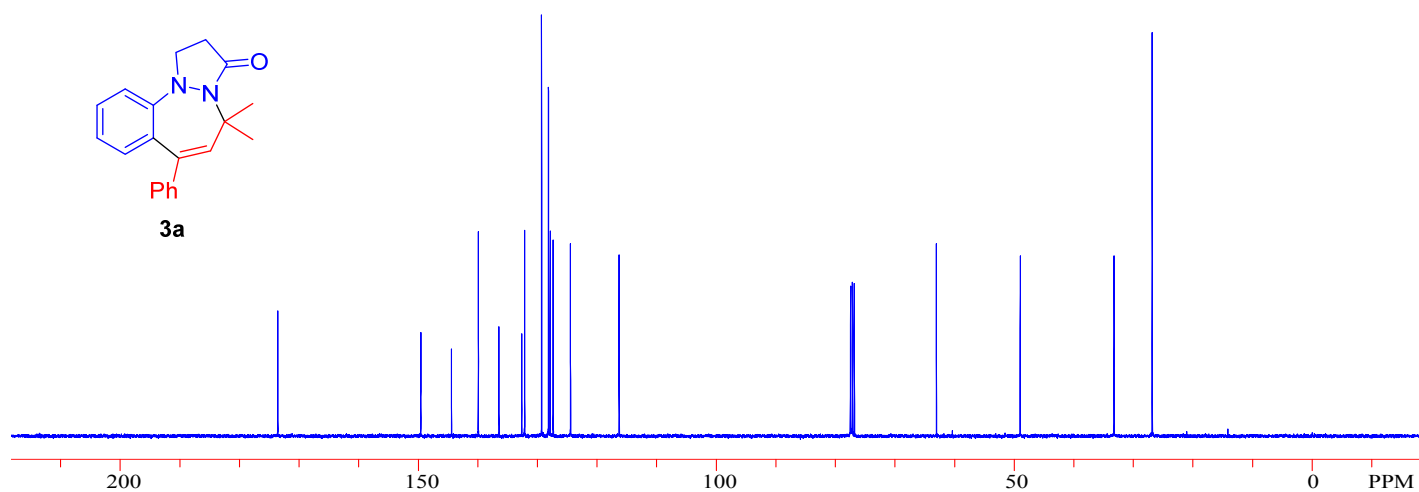



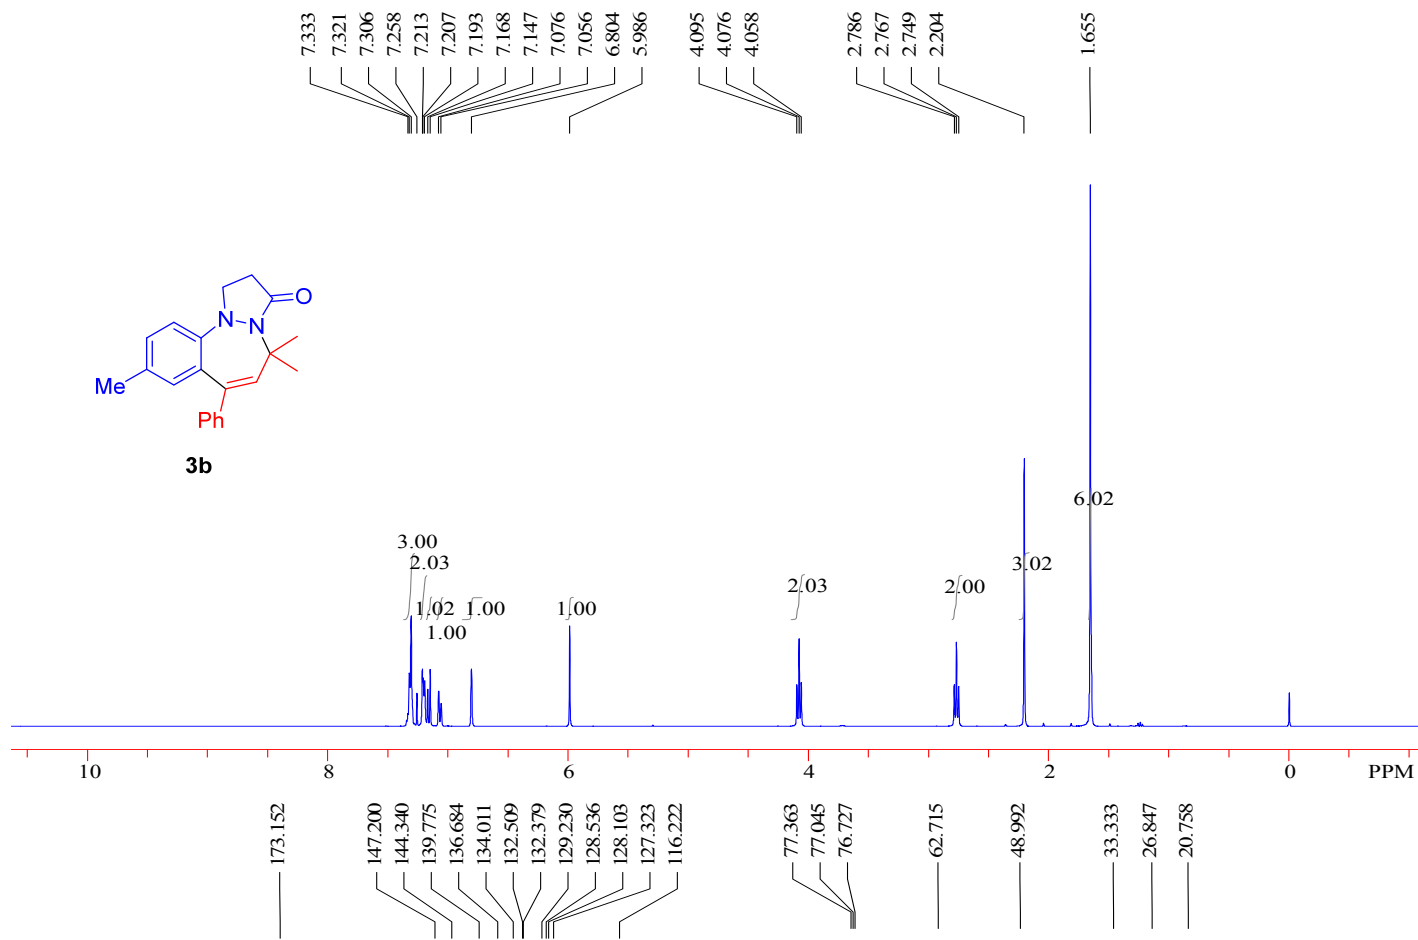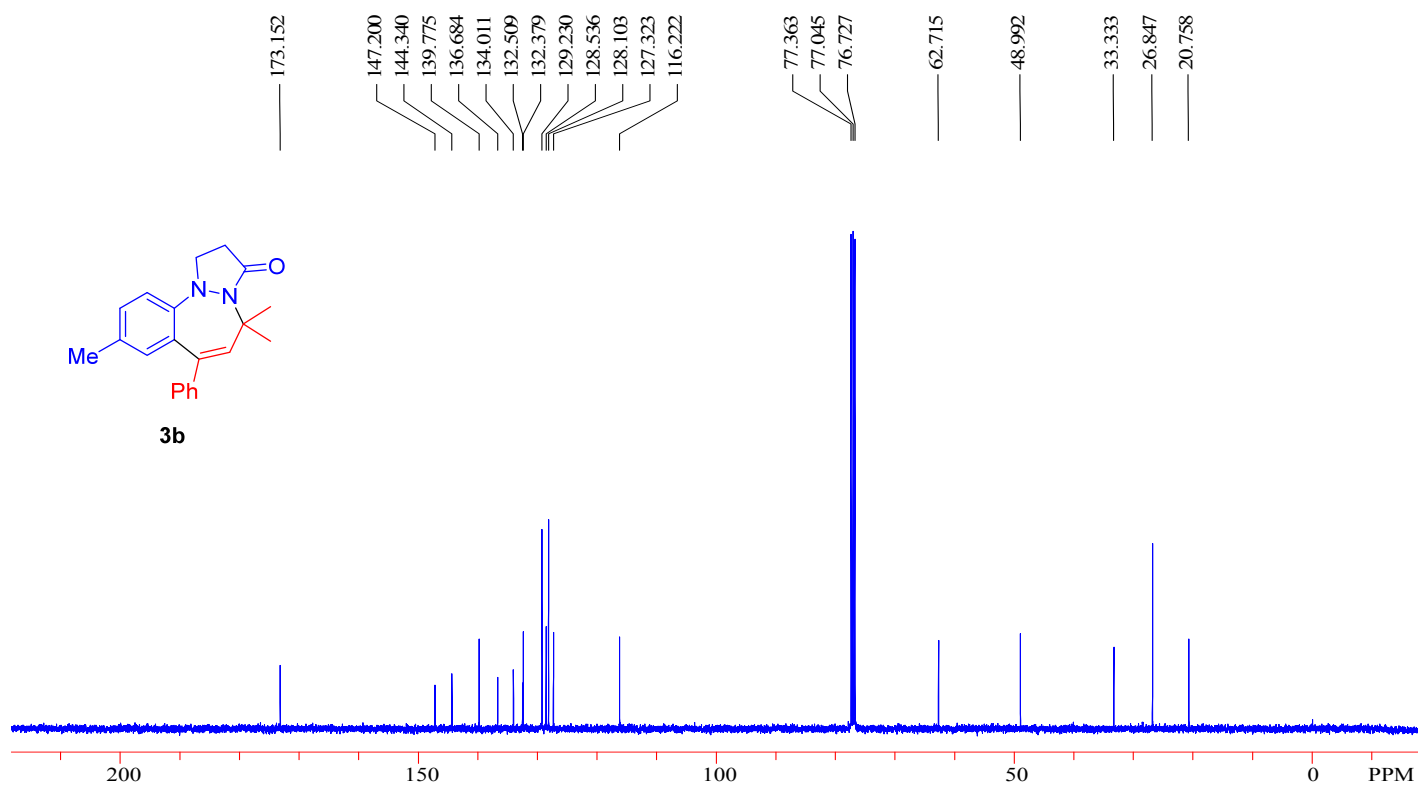

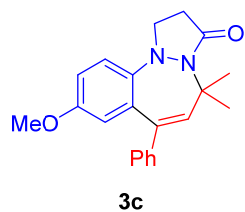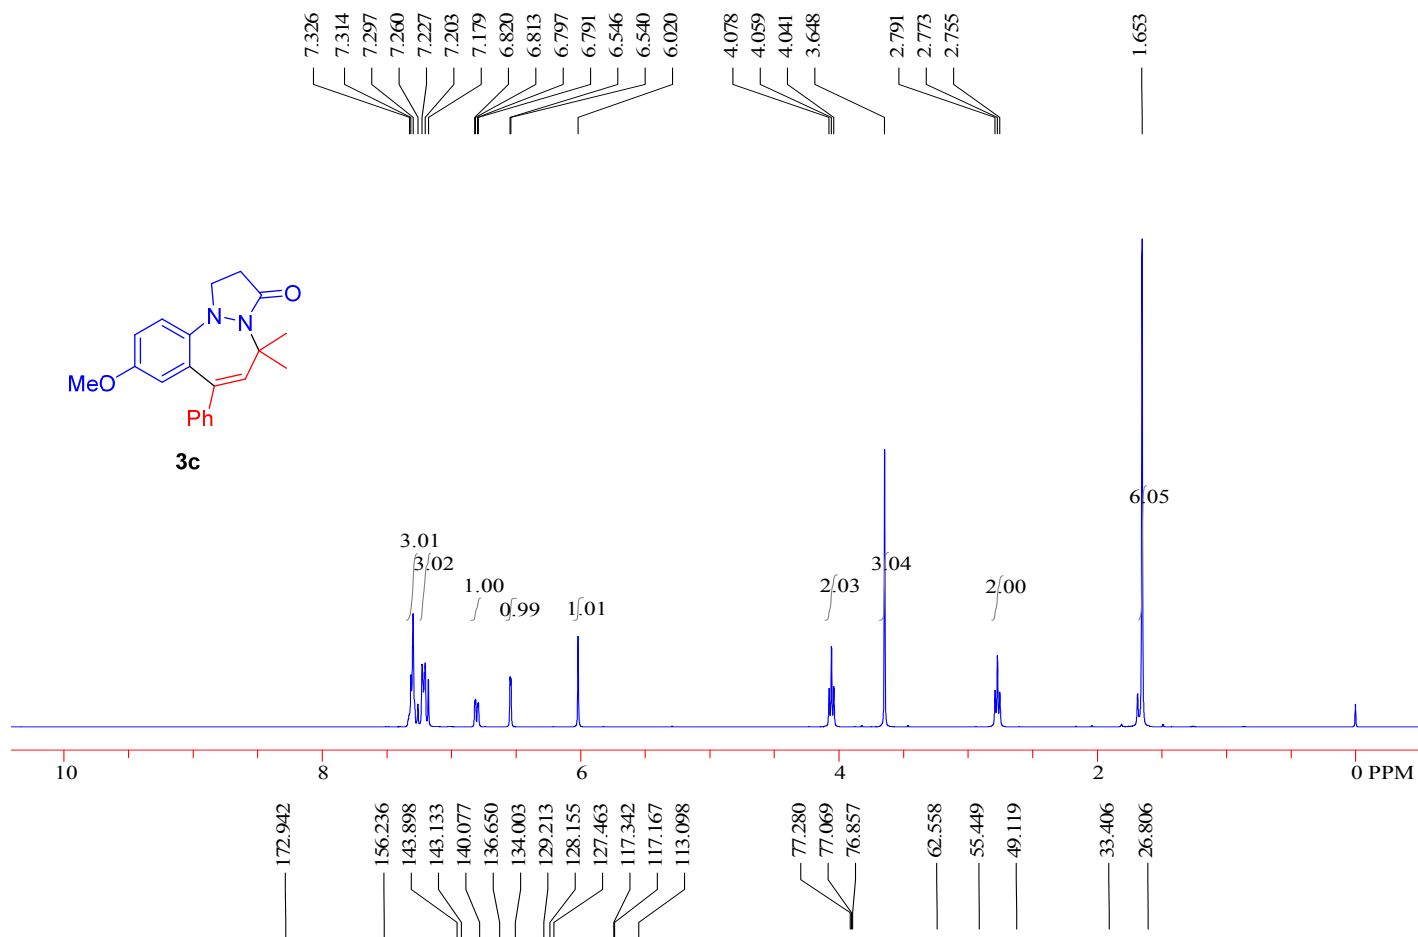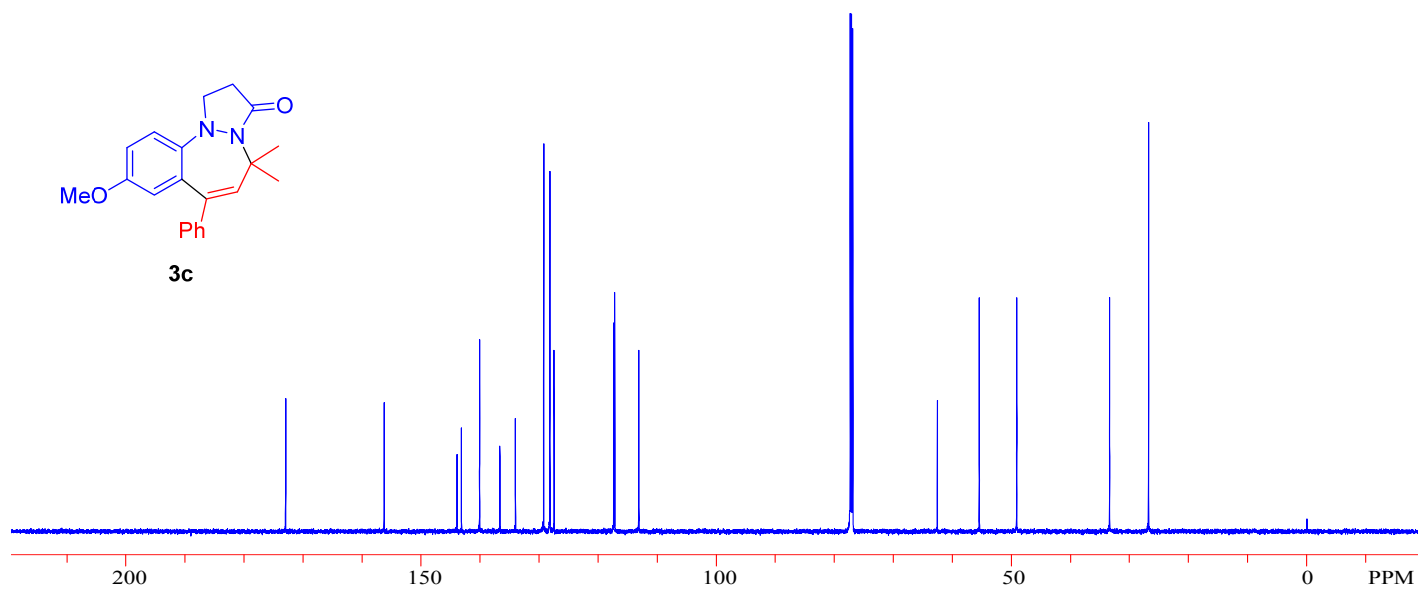

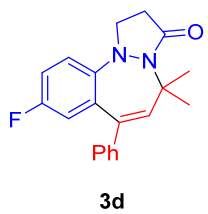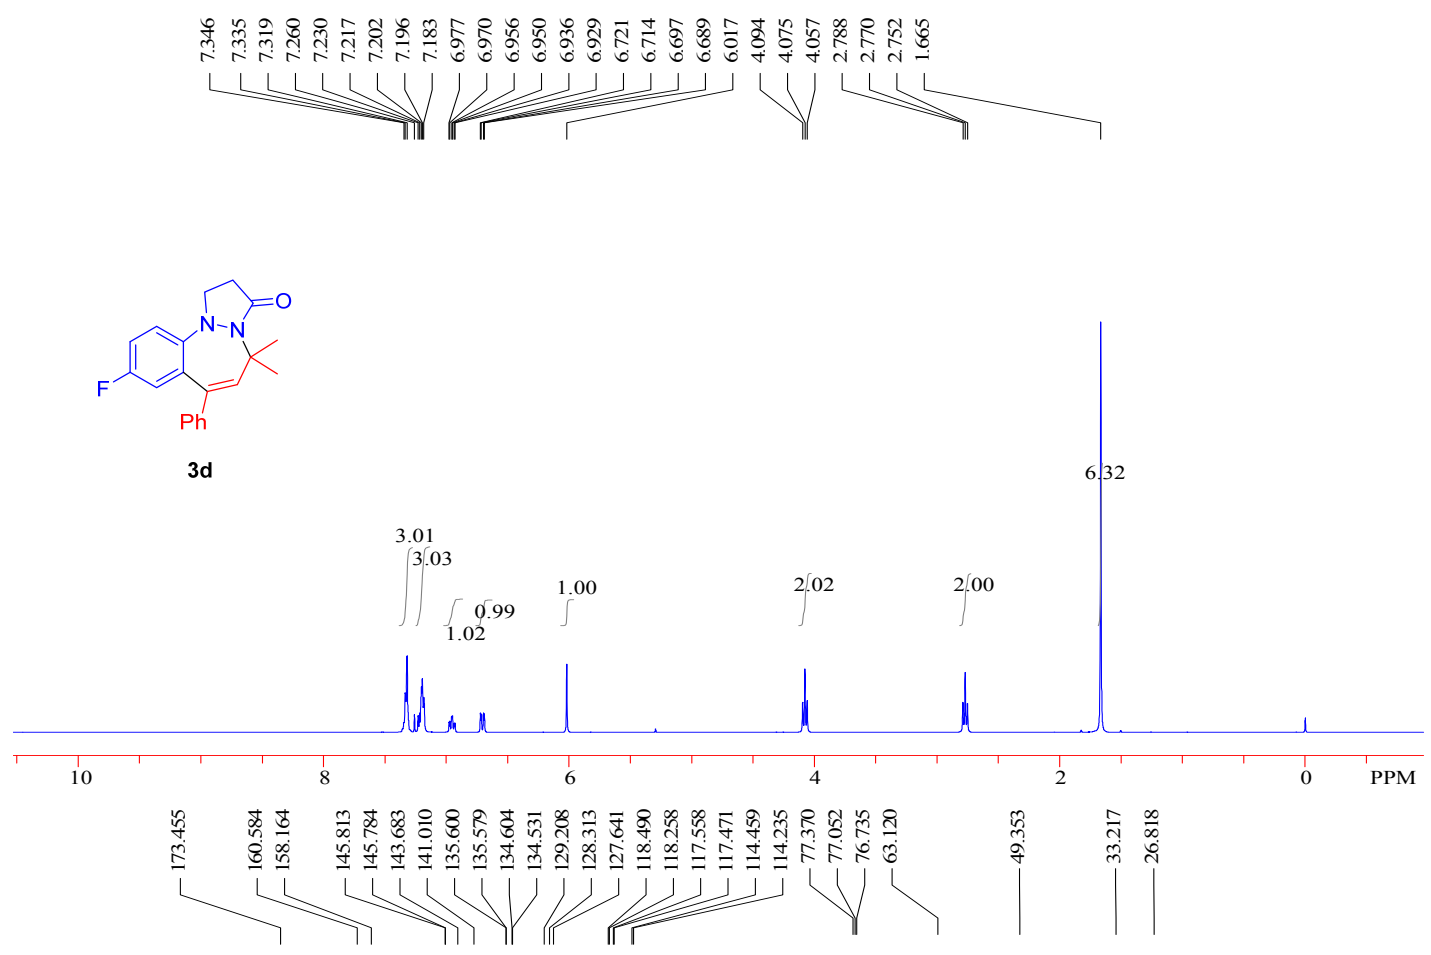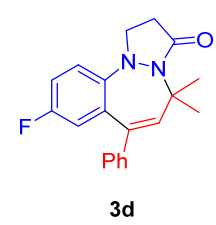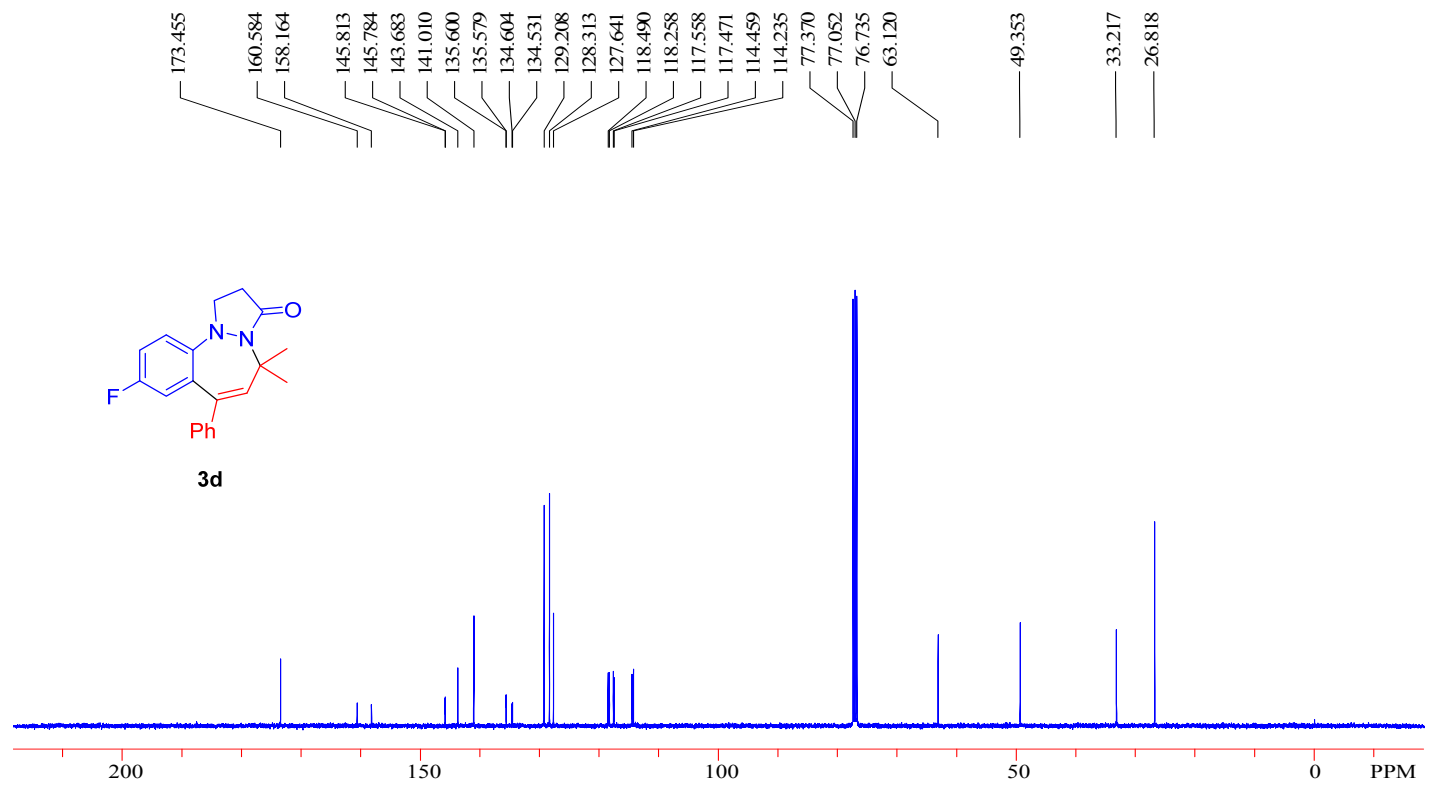

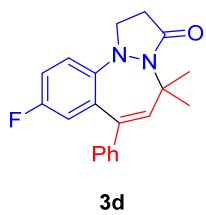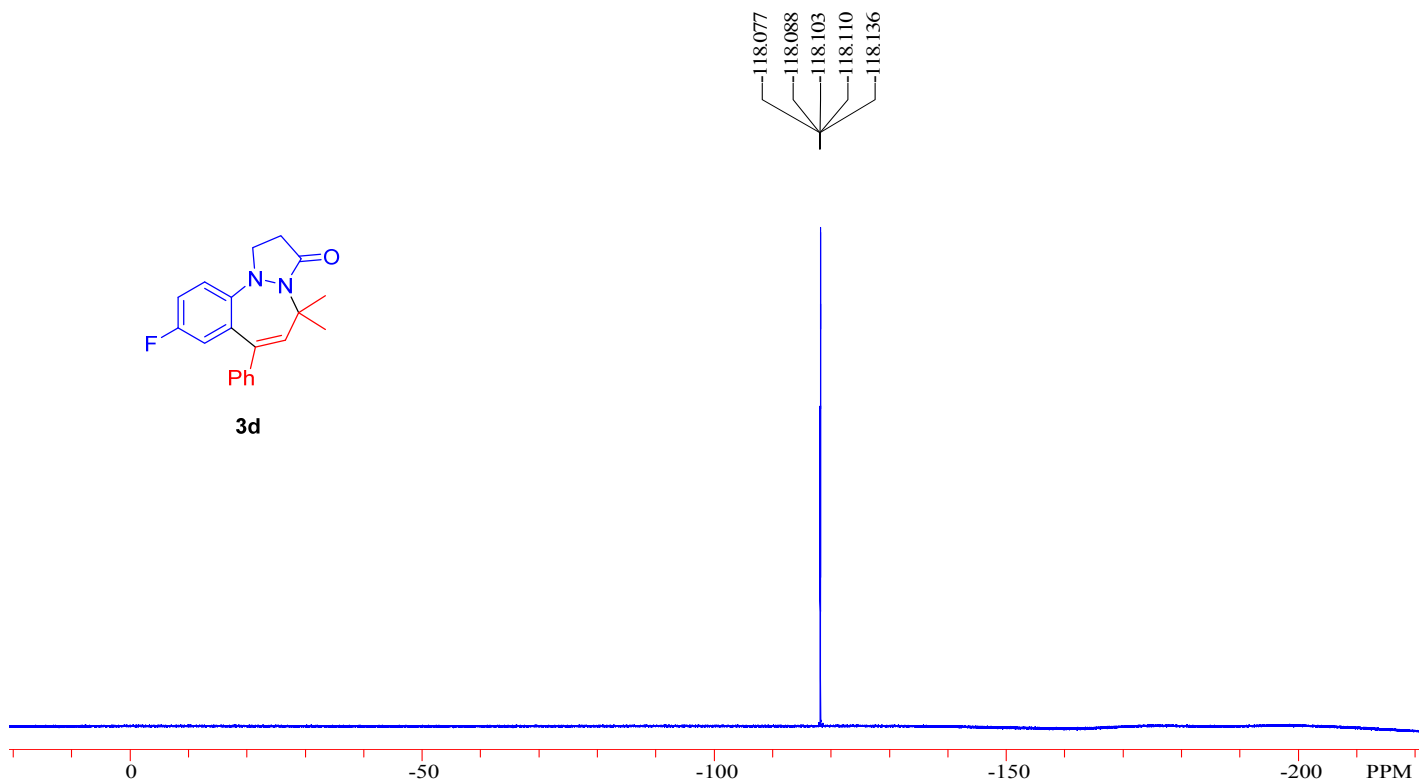

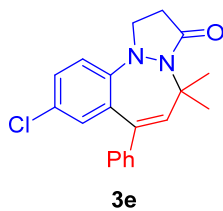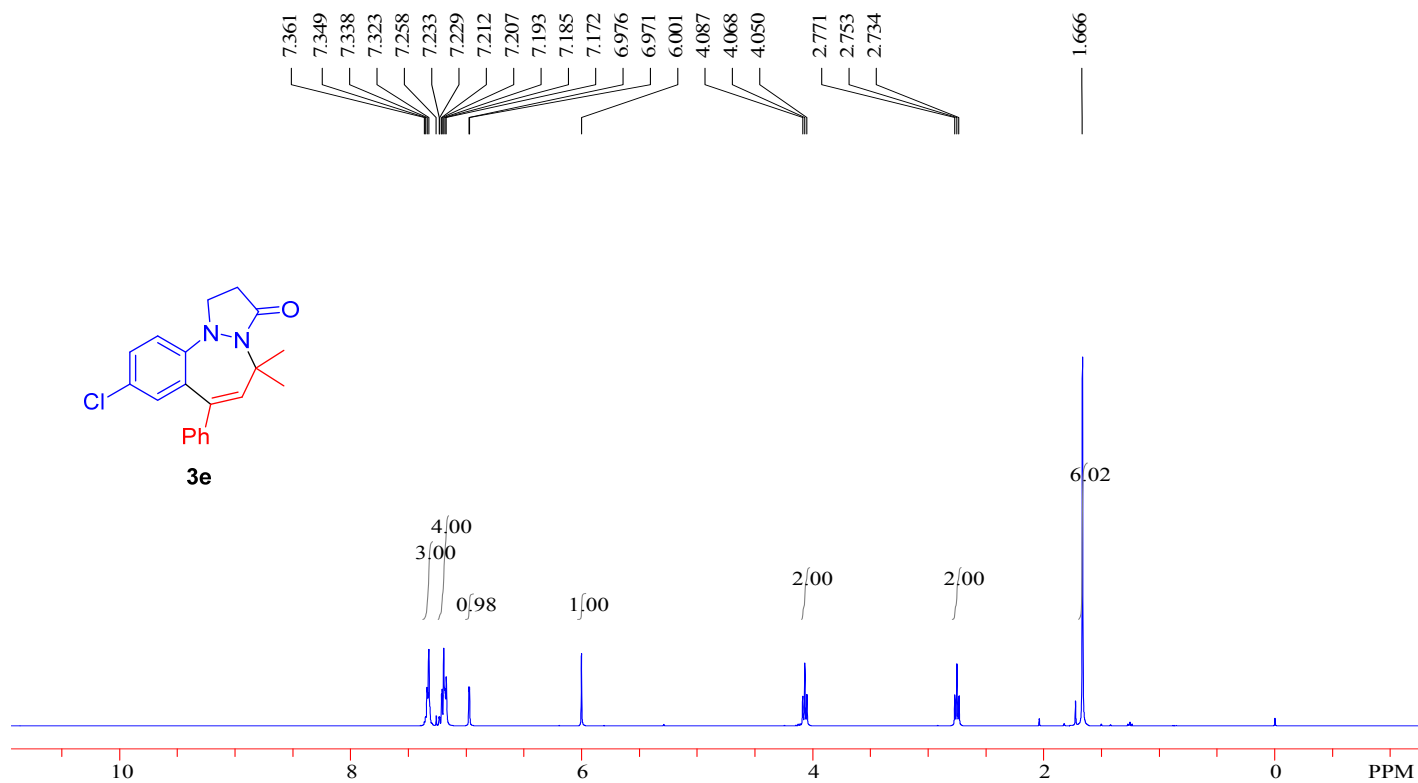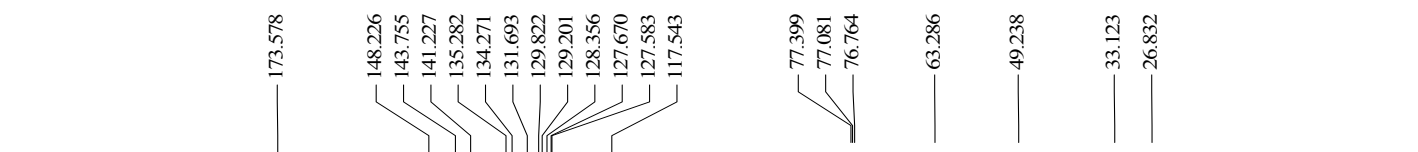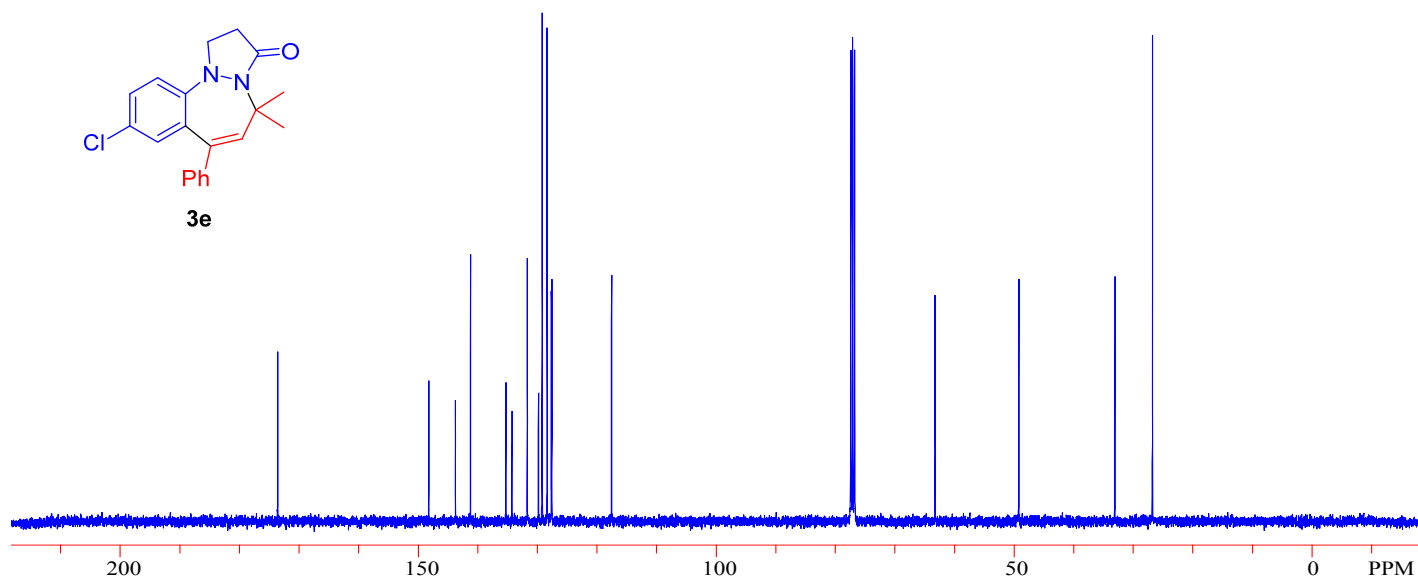

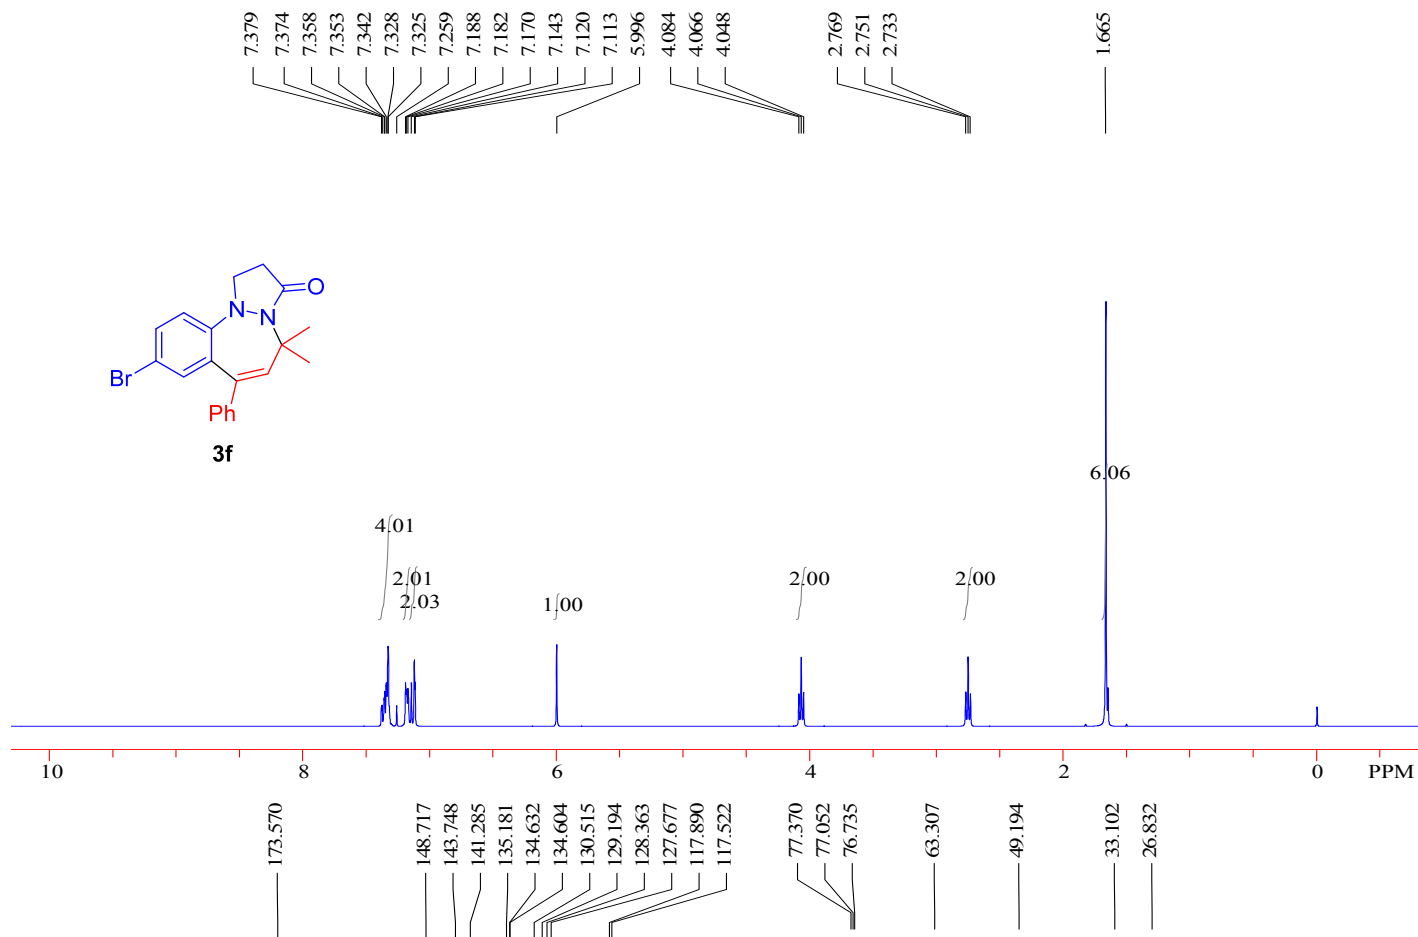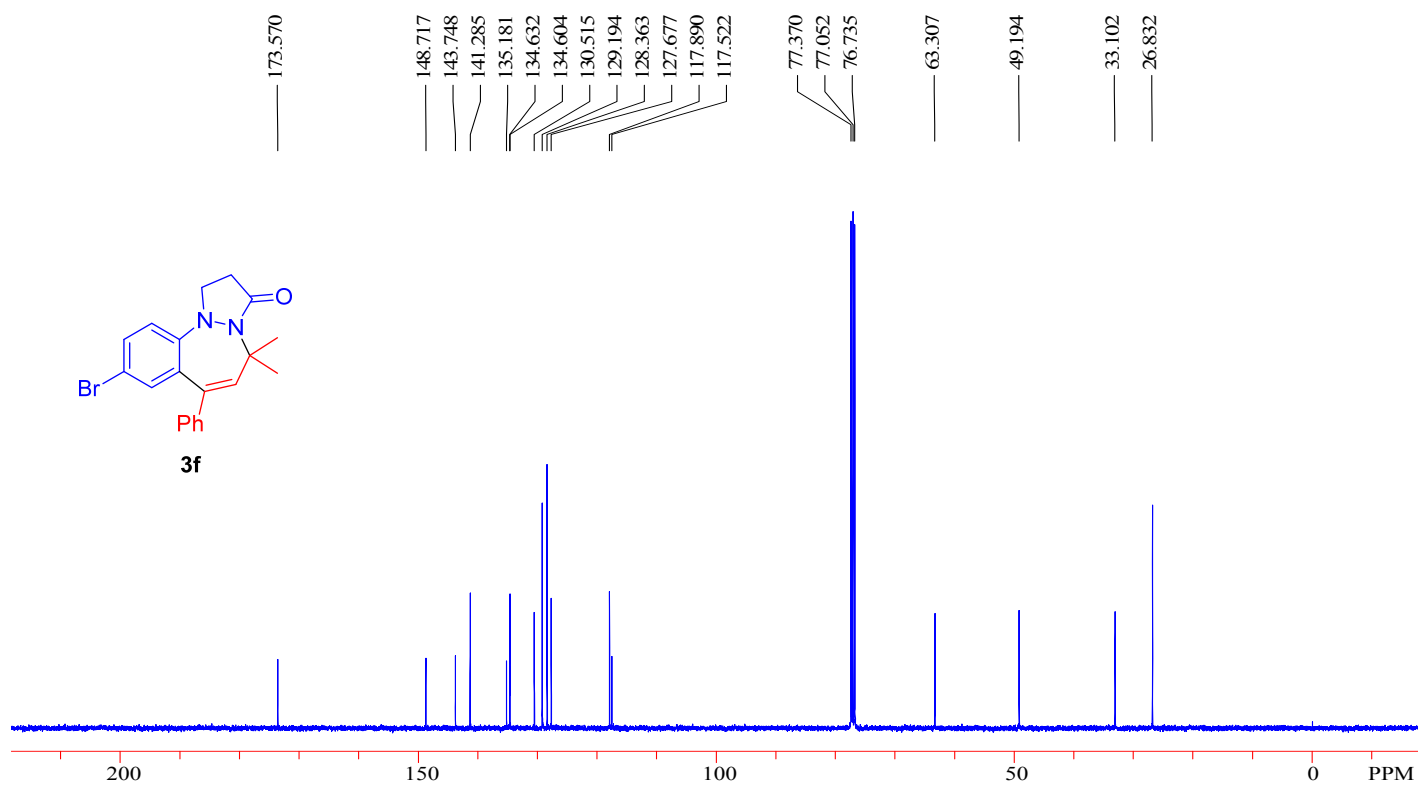

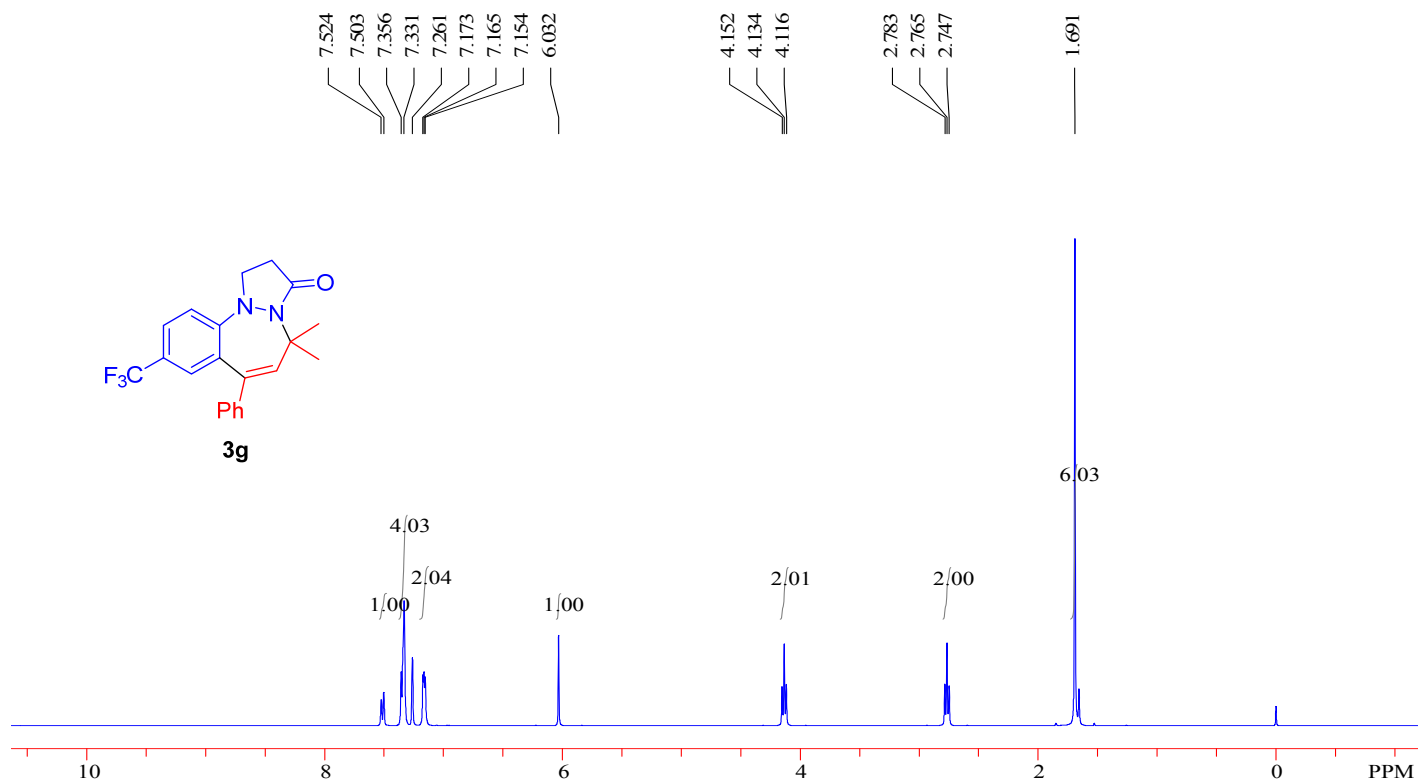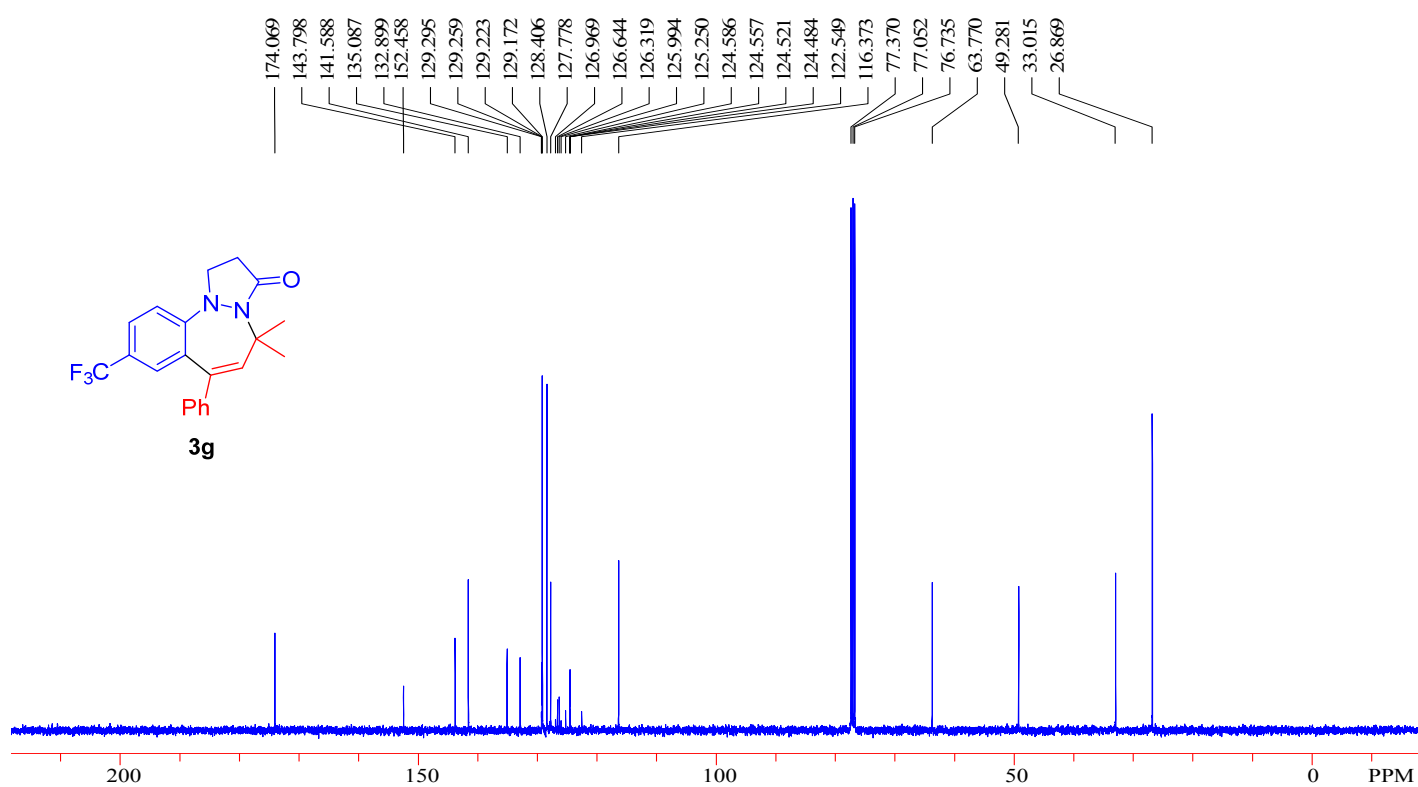

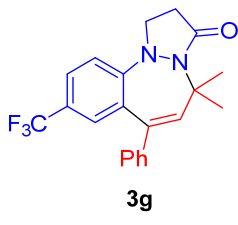

-62.223

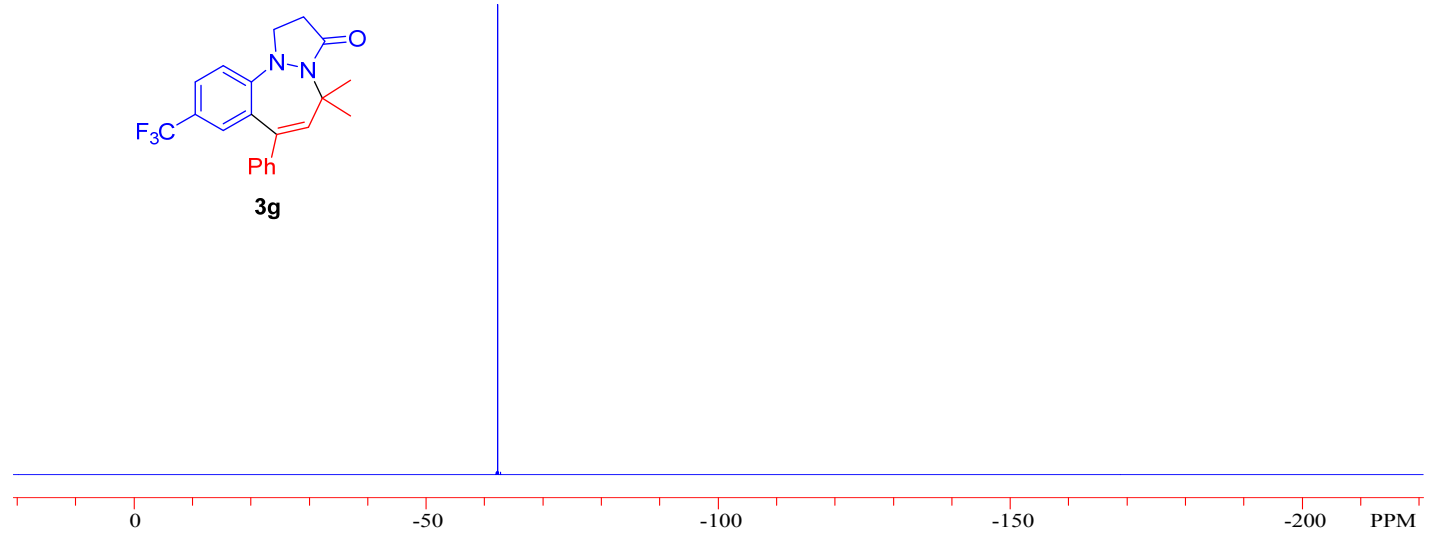



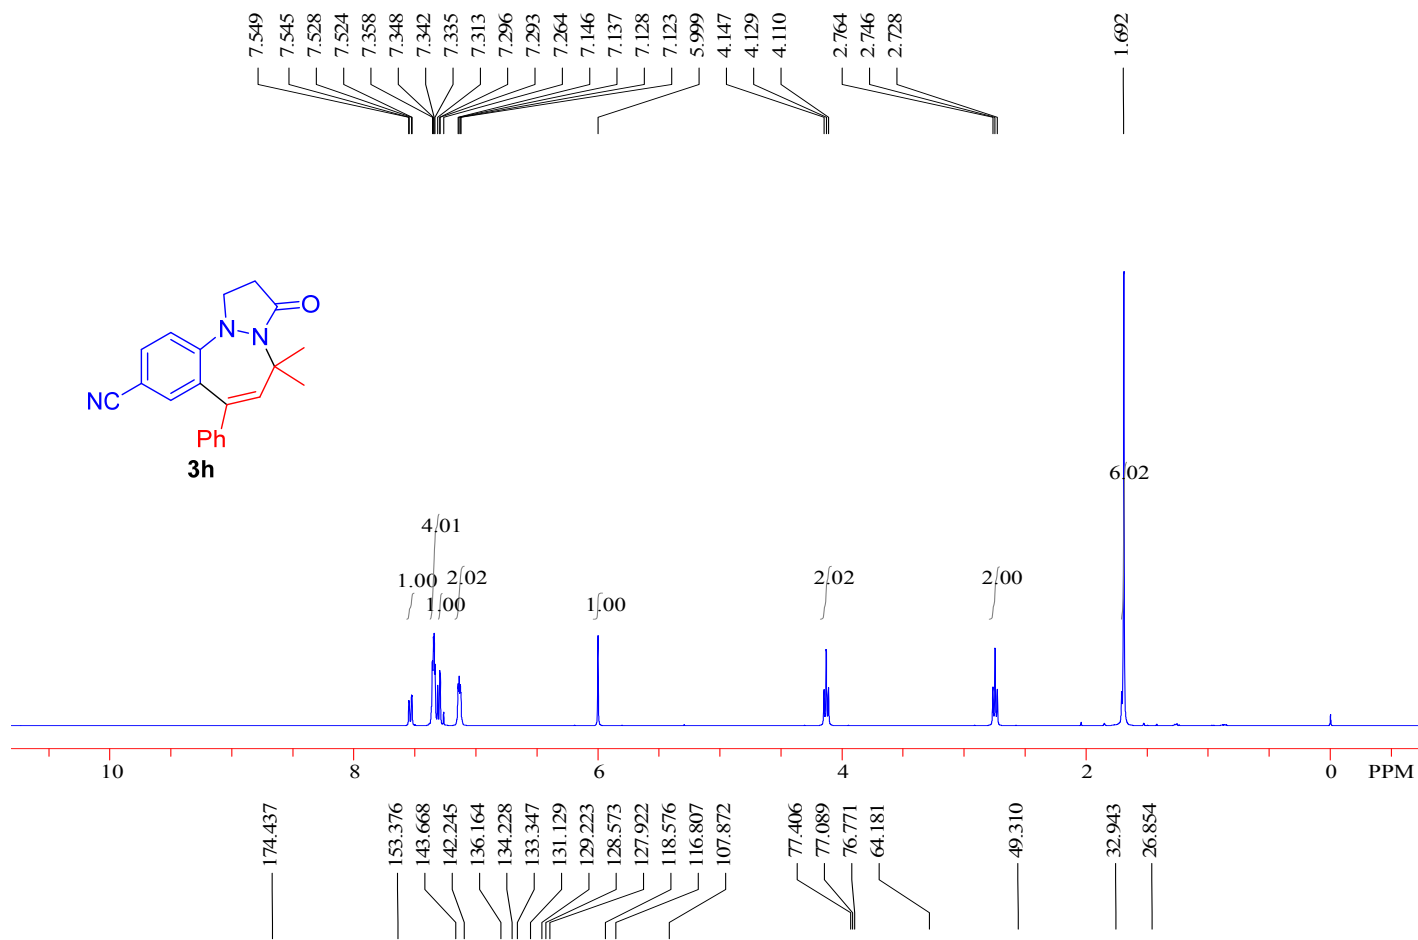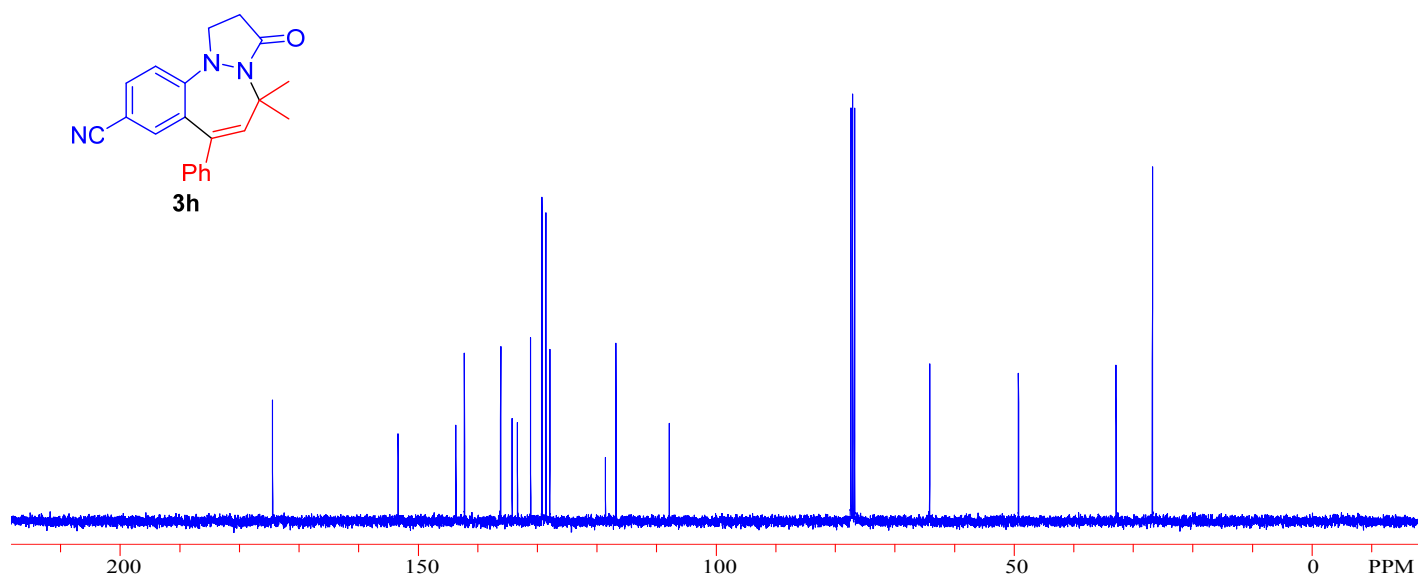

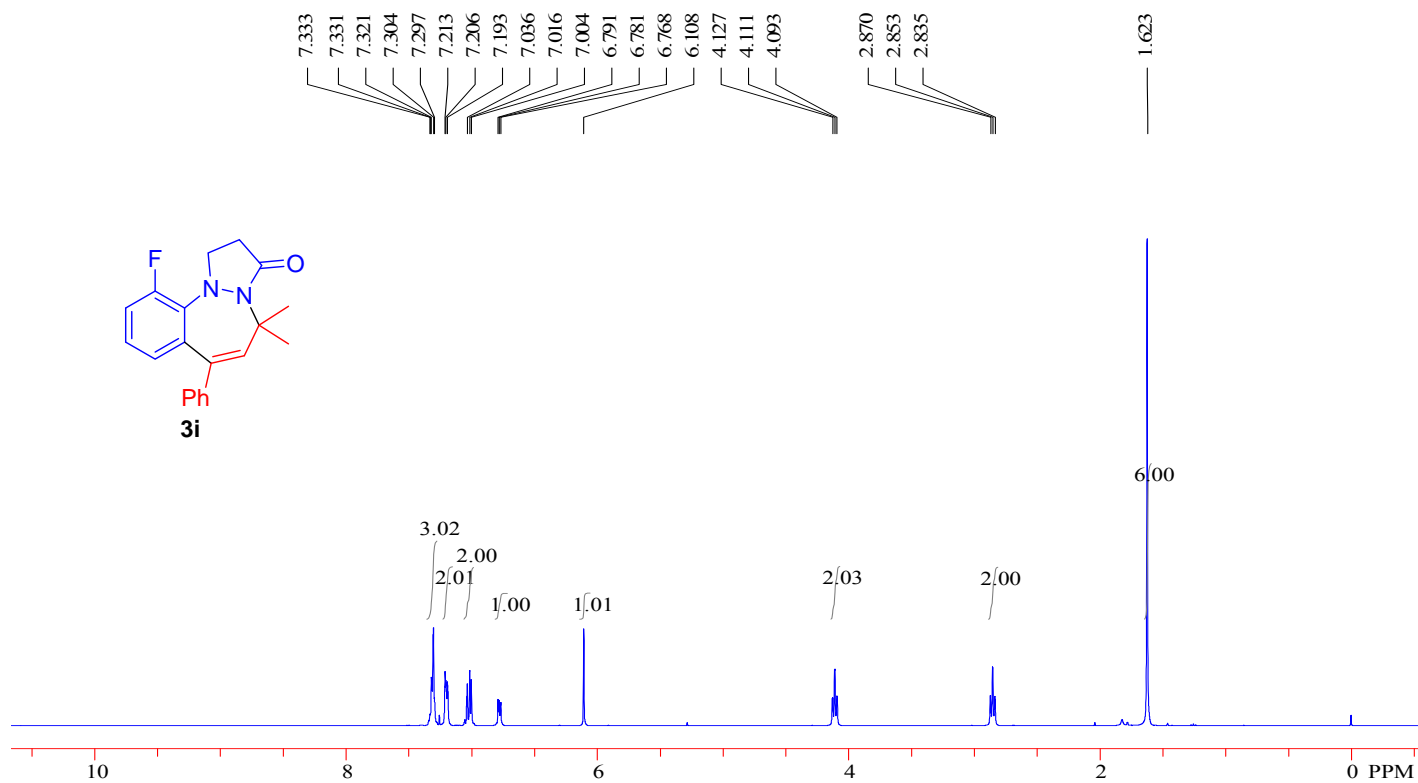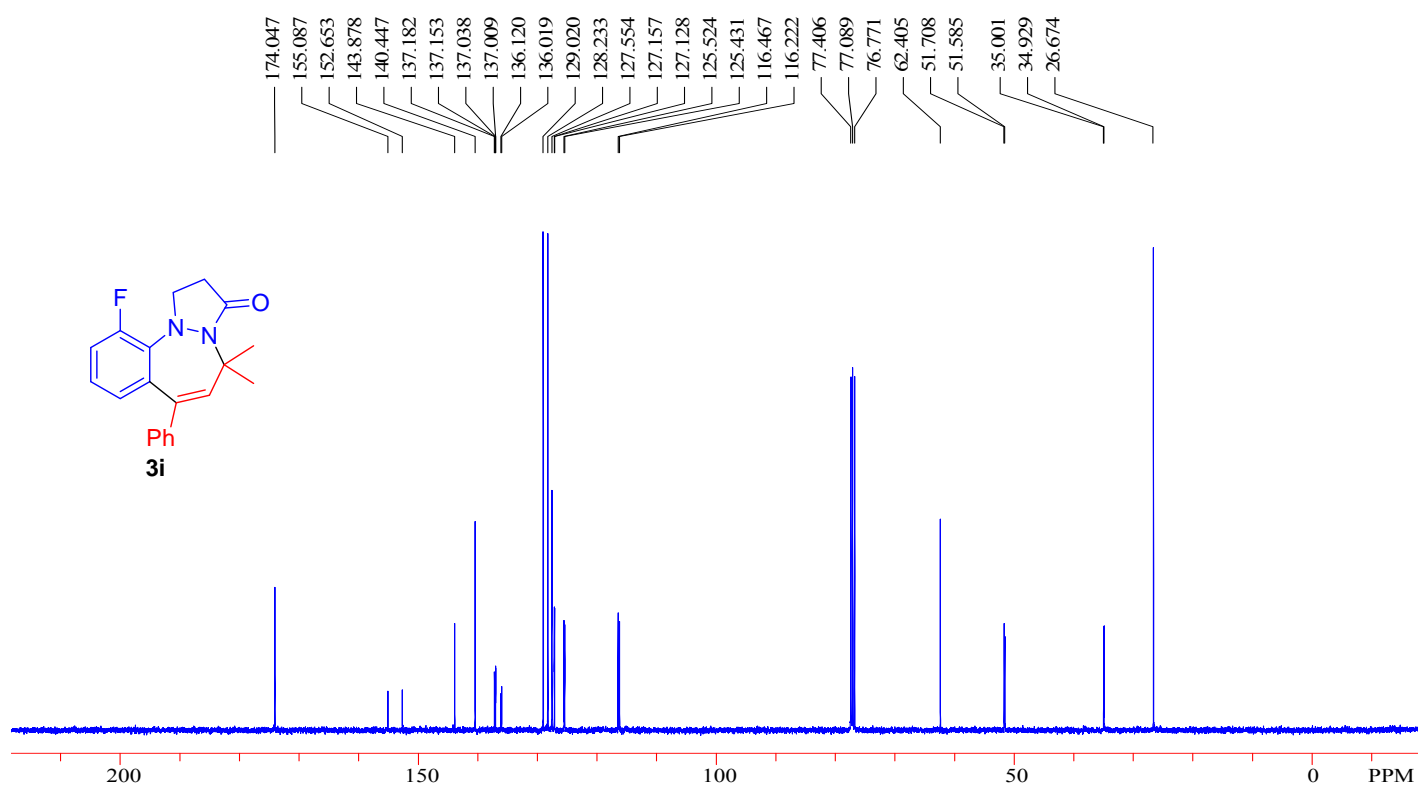

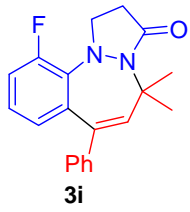

119.886  
119.901  
119.915  
119.926

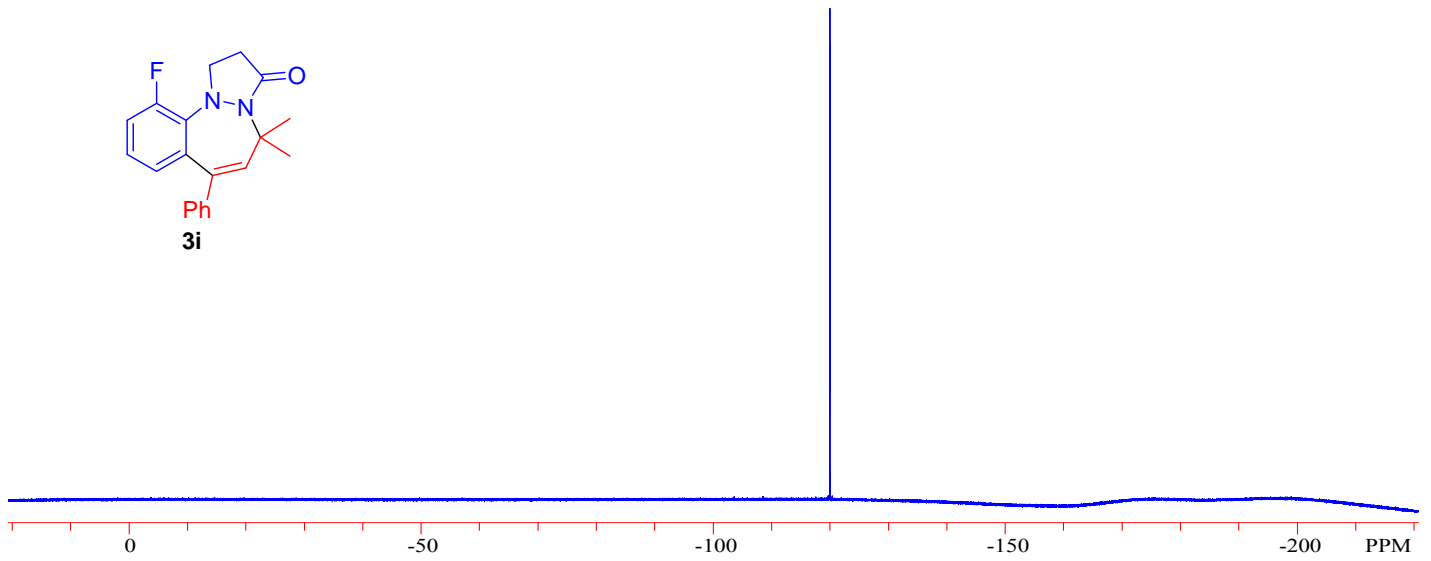

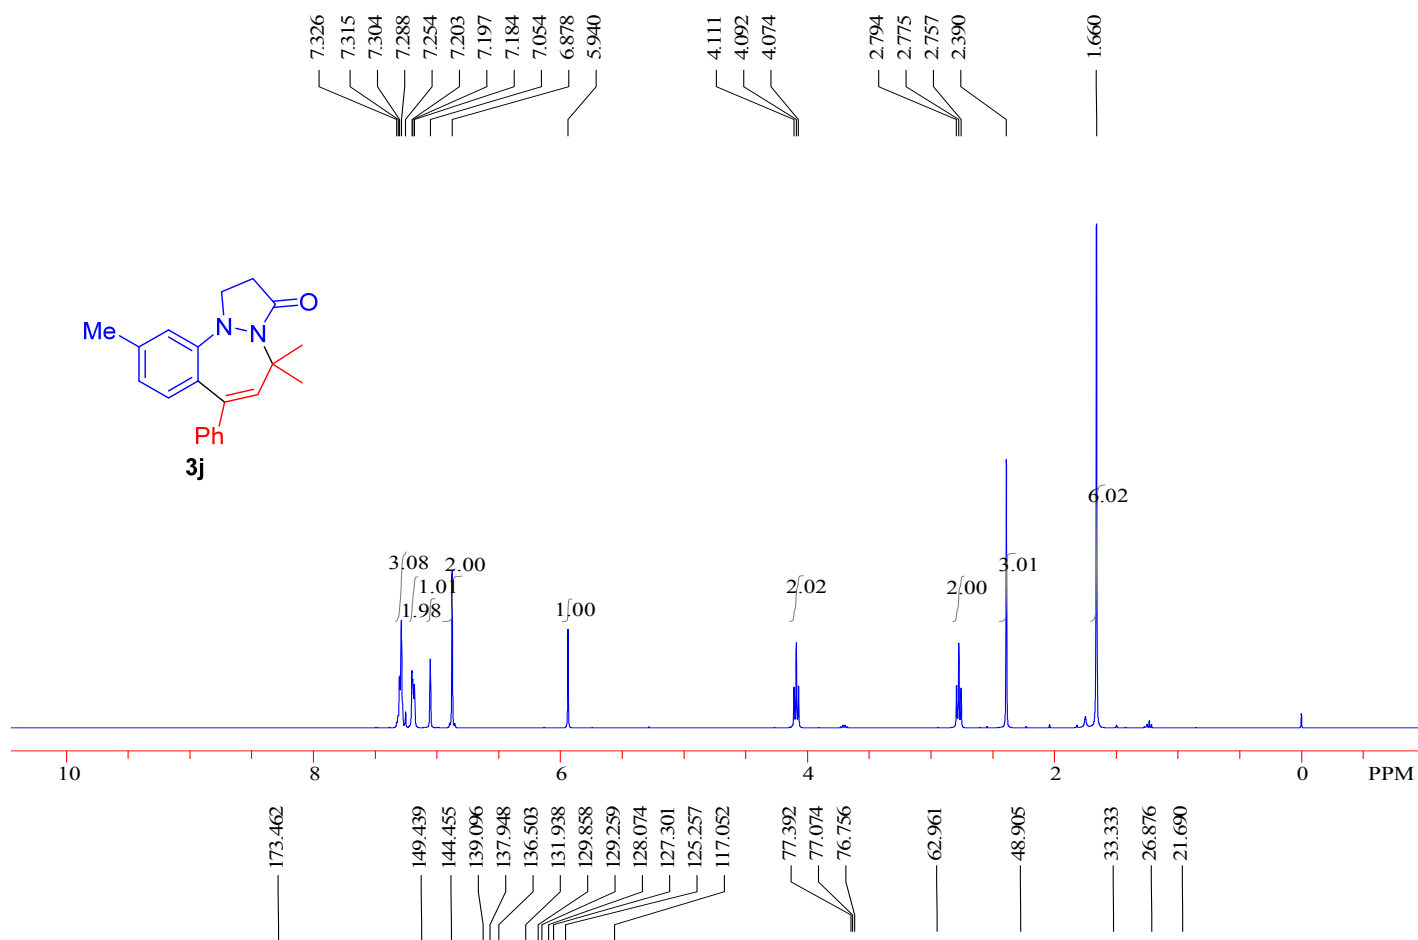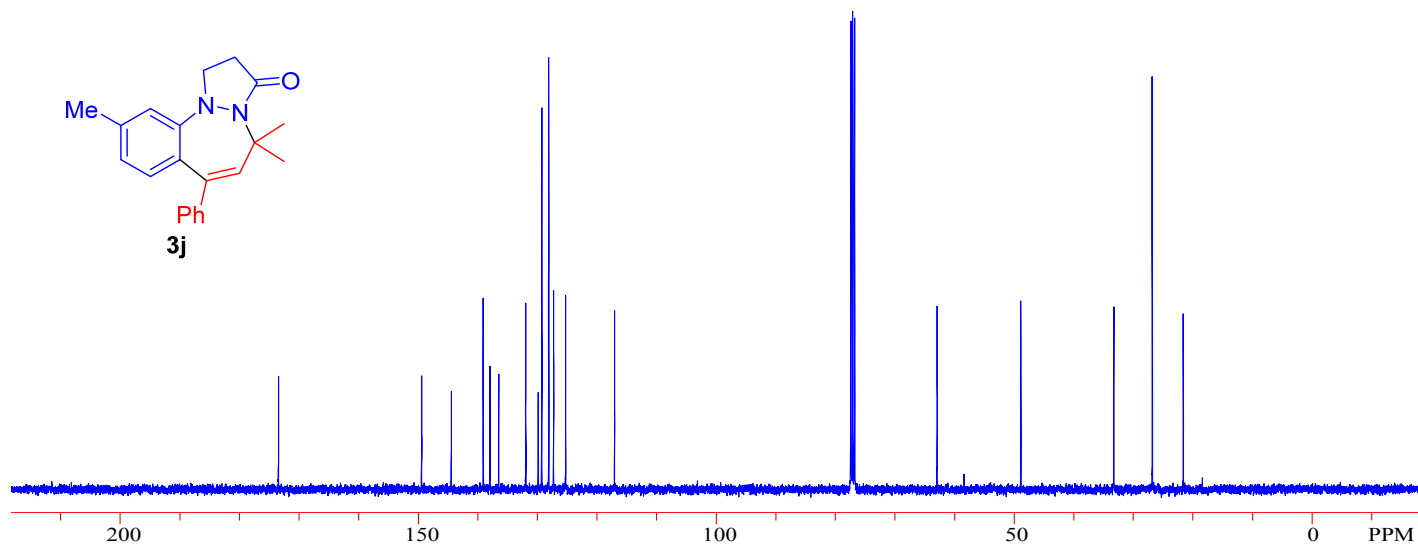

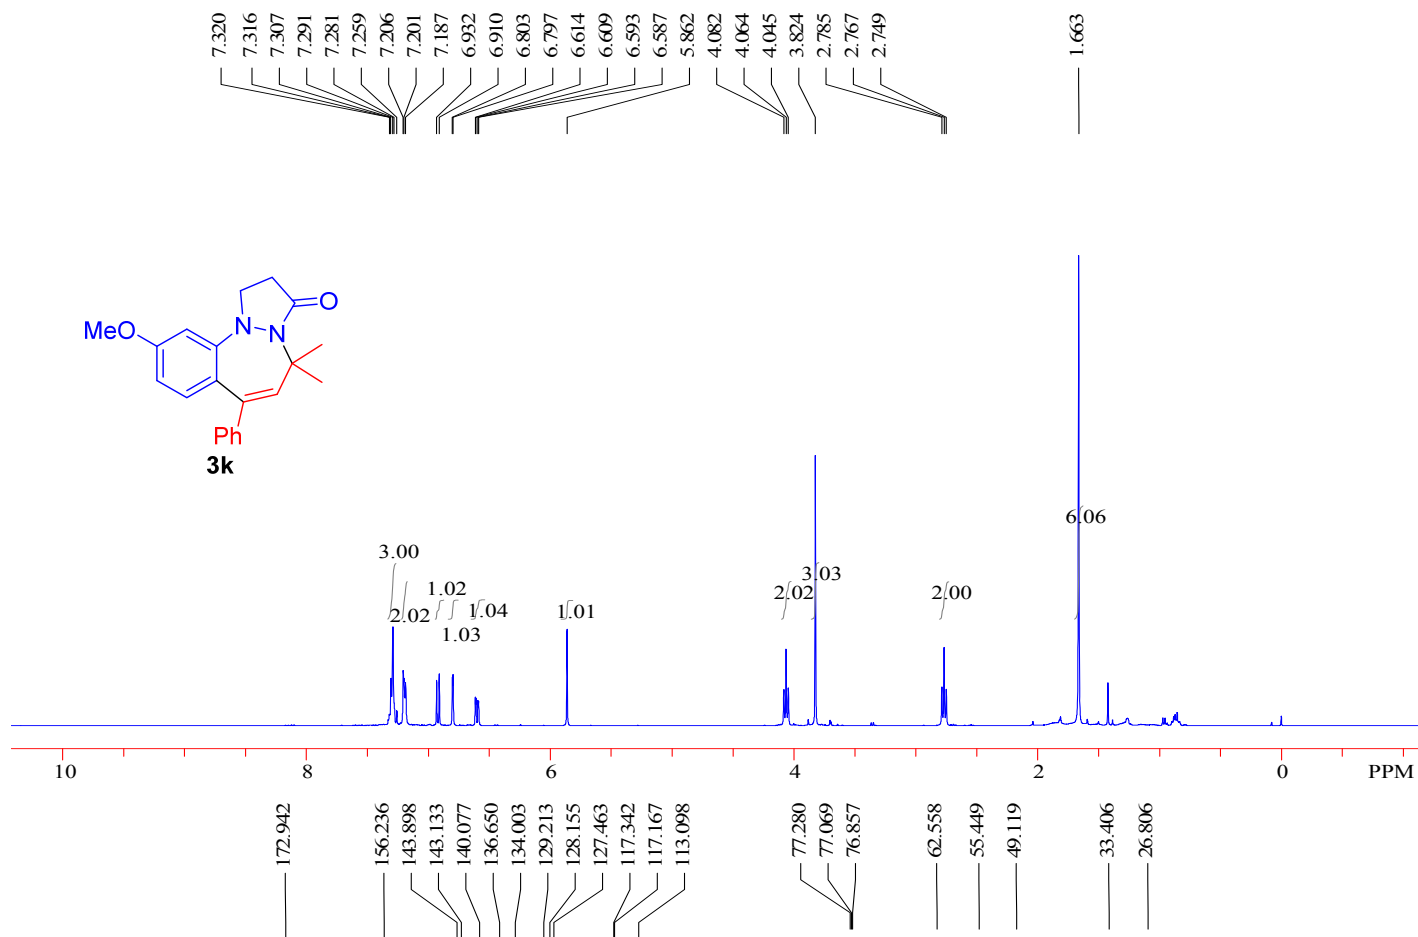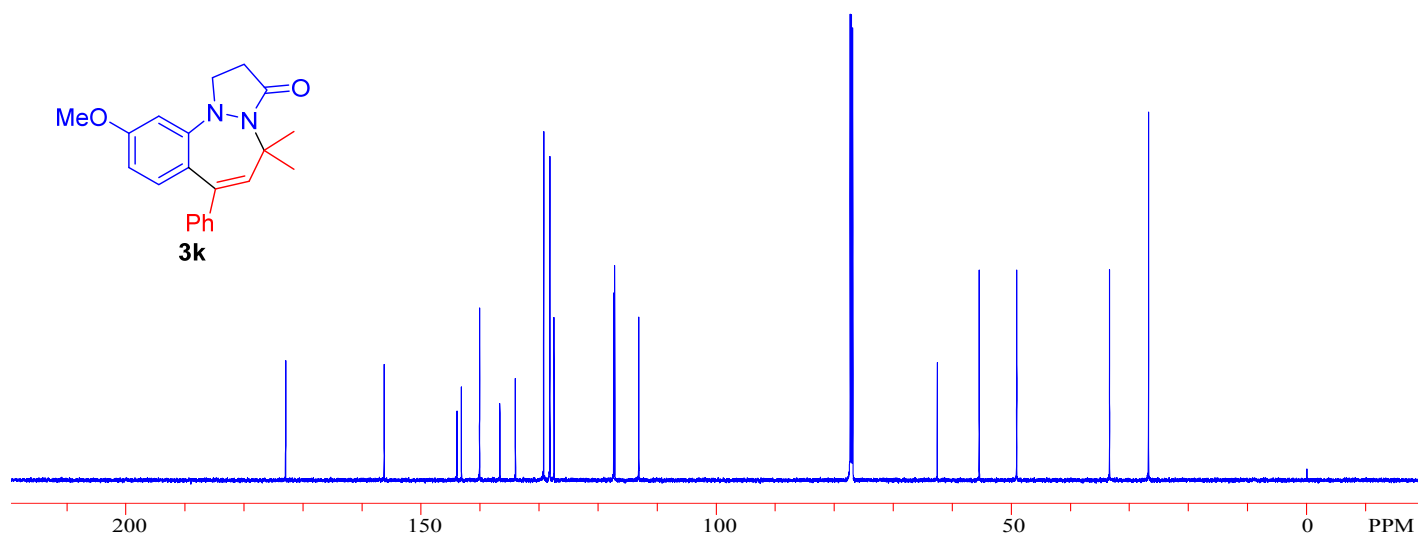

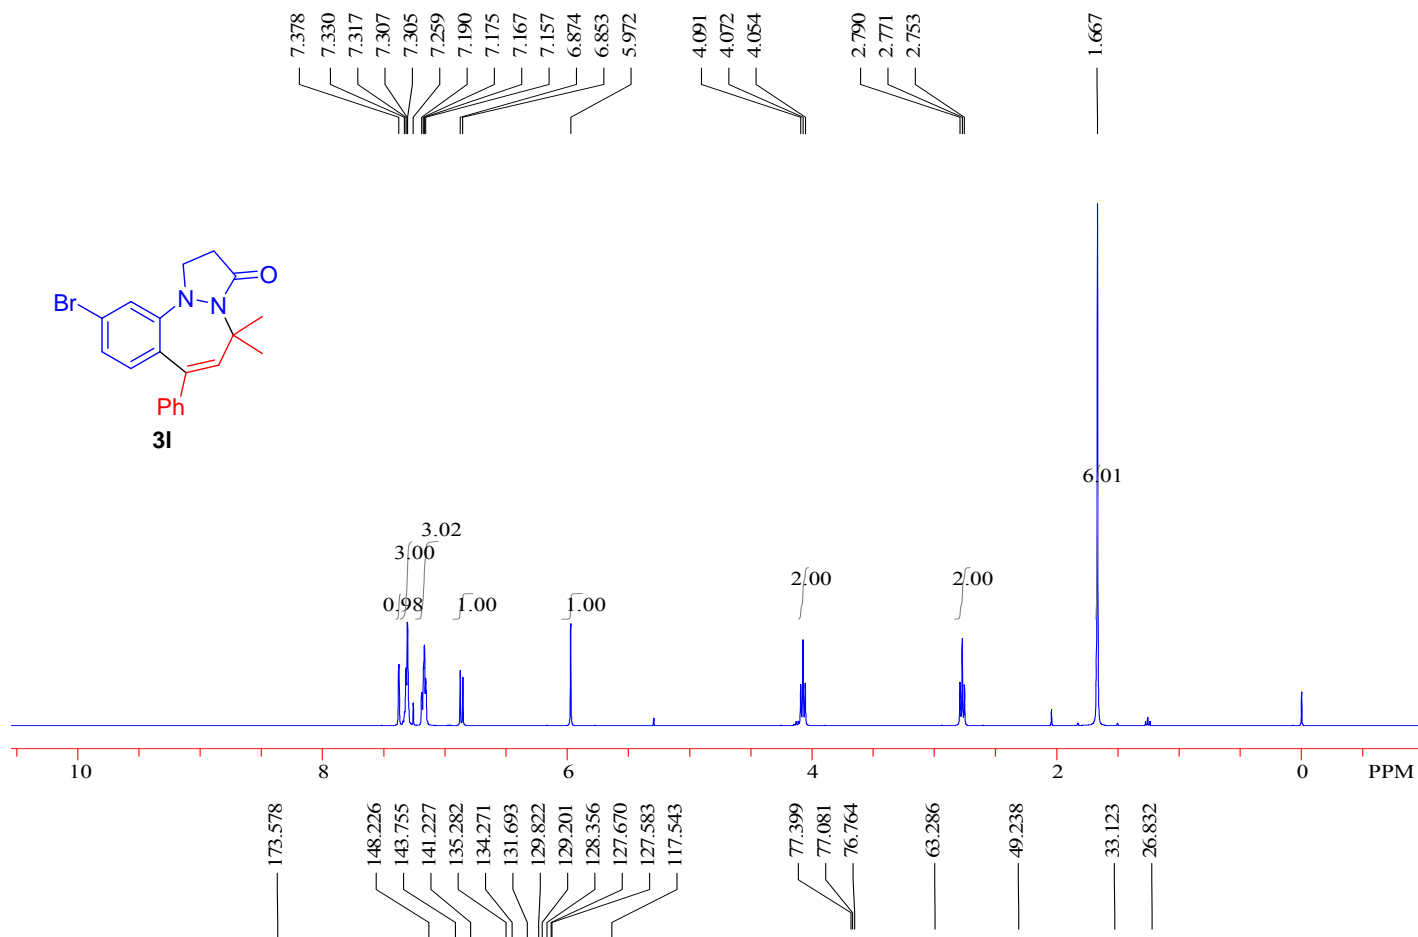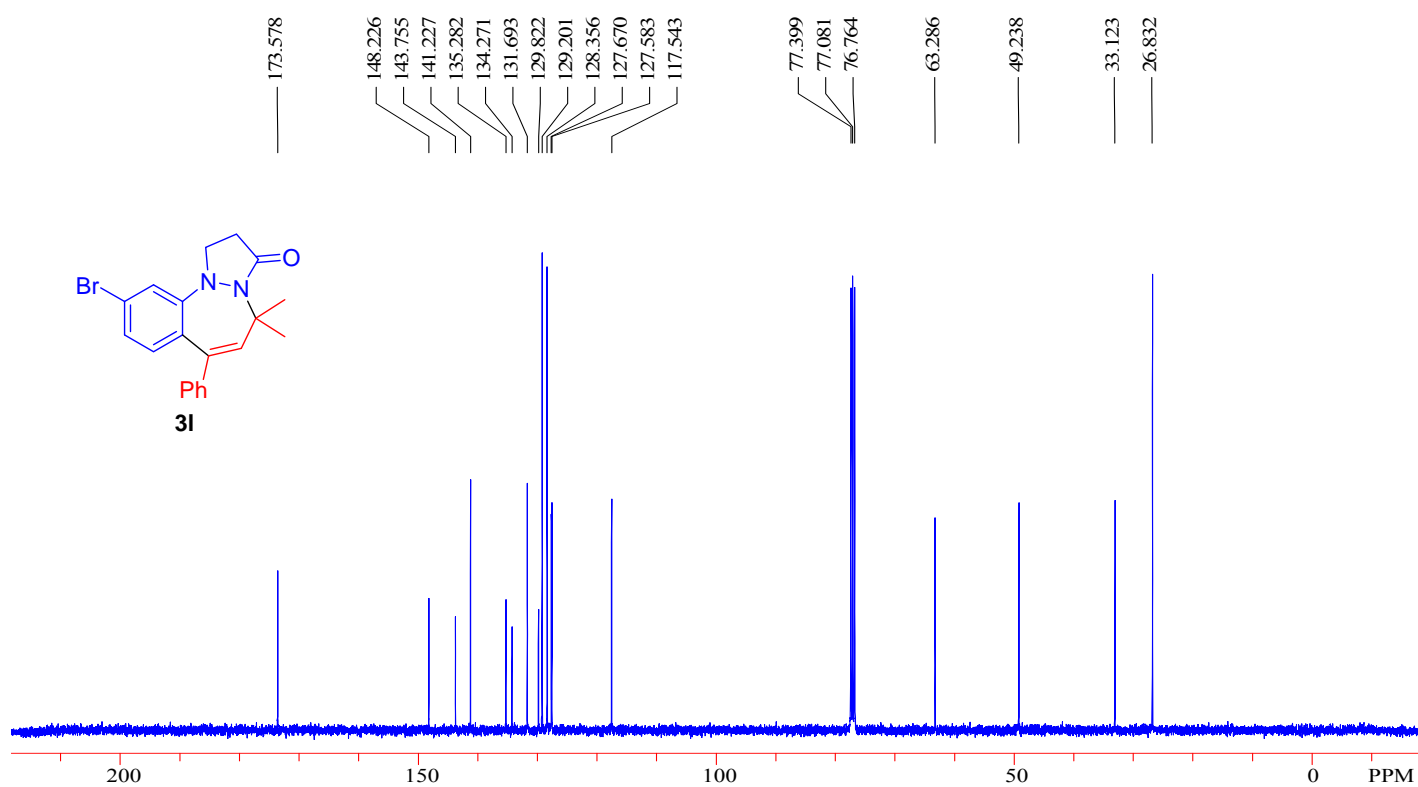

7.333  
7.329  
7.321  
7.317  
7.308  
7.303  
7.297  
7.258  
7.183  
7.176  
7.172  
7.164  
7.160  
6.984  
6.977  
6.969  
6.964  
6.958  
6.951  
6.948  
6.791  
6.785  
6.771  
6.765  
6.750  
6.744  
5.927  
4.078  
4.059  
4.041  
2.785  
2.766  
2.748  
1.671

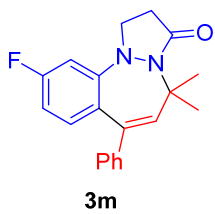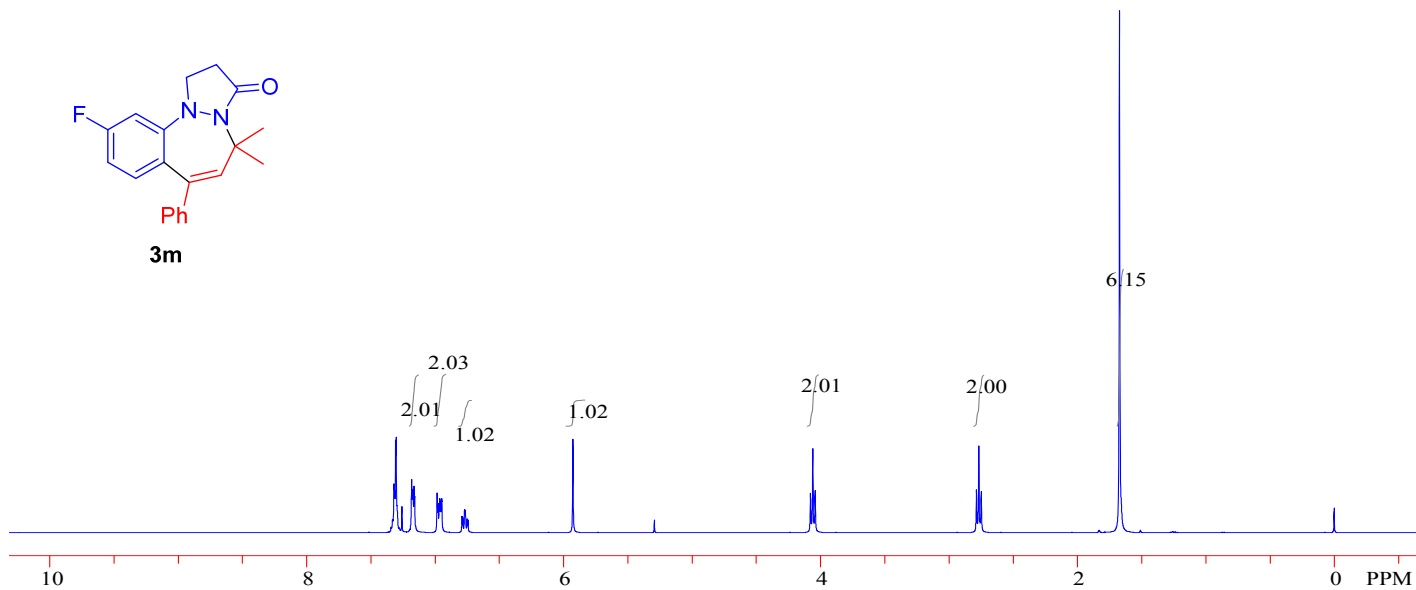

173.643  
162.931  
160.461  
151.209  
151.144  
144.347  
139.508  
135.492  
133.643  
133.556  
129.223  
128.580  
128.551  
128.211  
127.475  
111.382  
111.173  
104.239  
104.001  
77.370  
77.052  
76.735  
63.416  
49.201  
32.892  
26.876

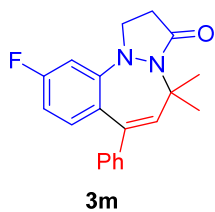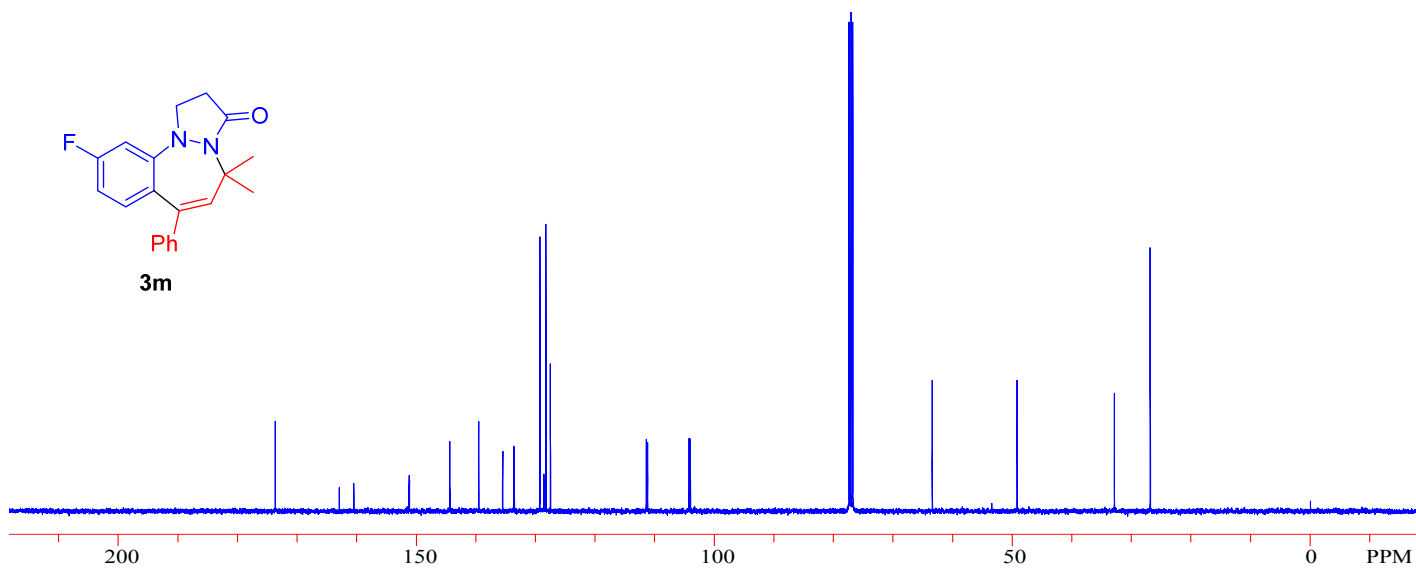

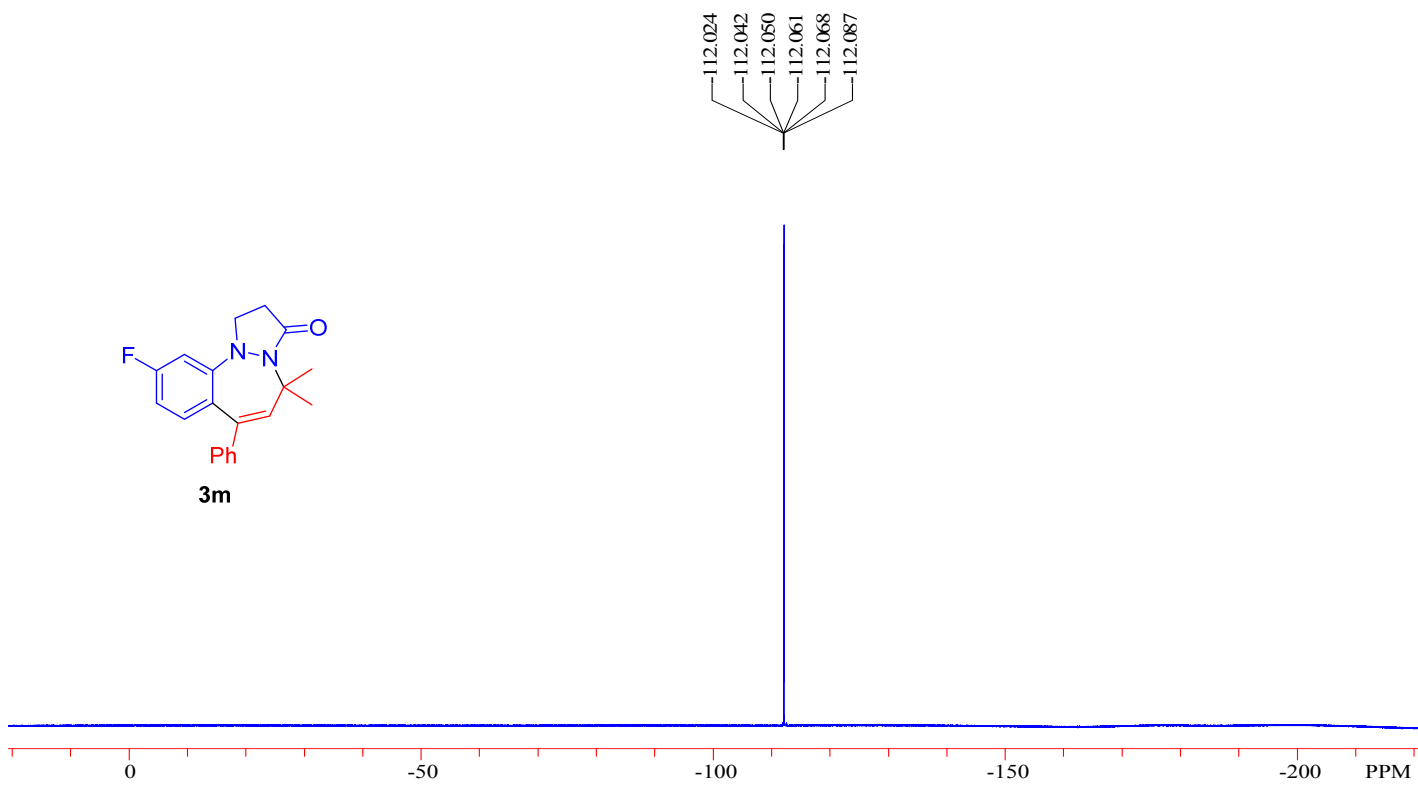



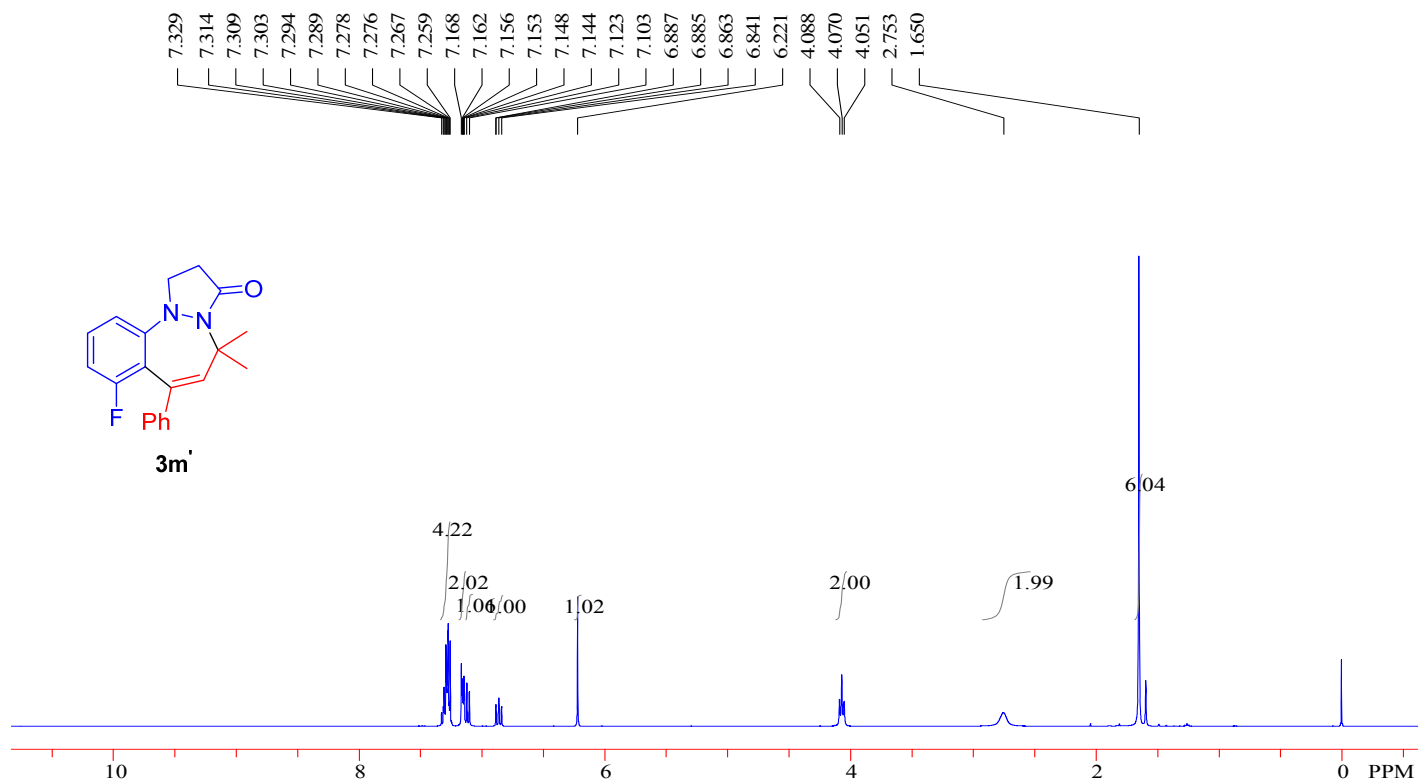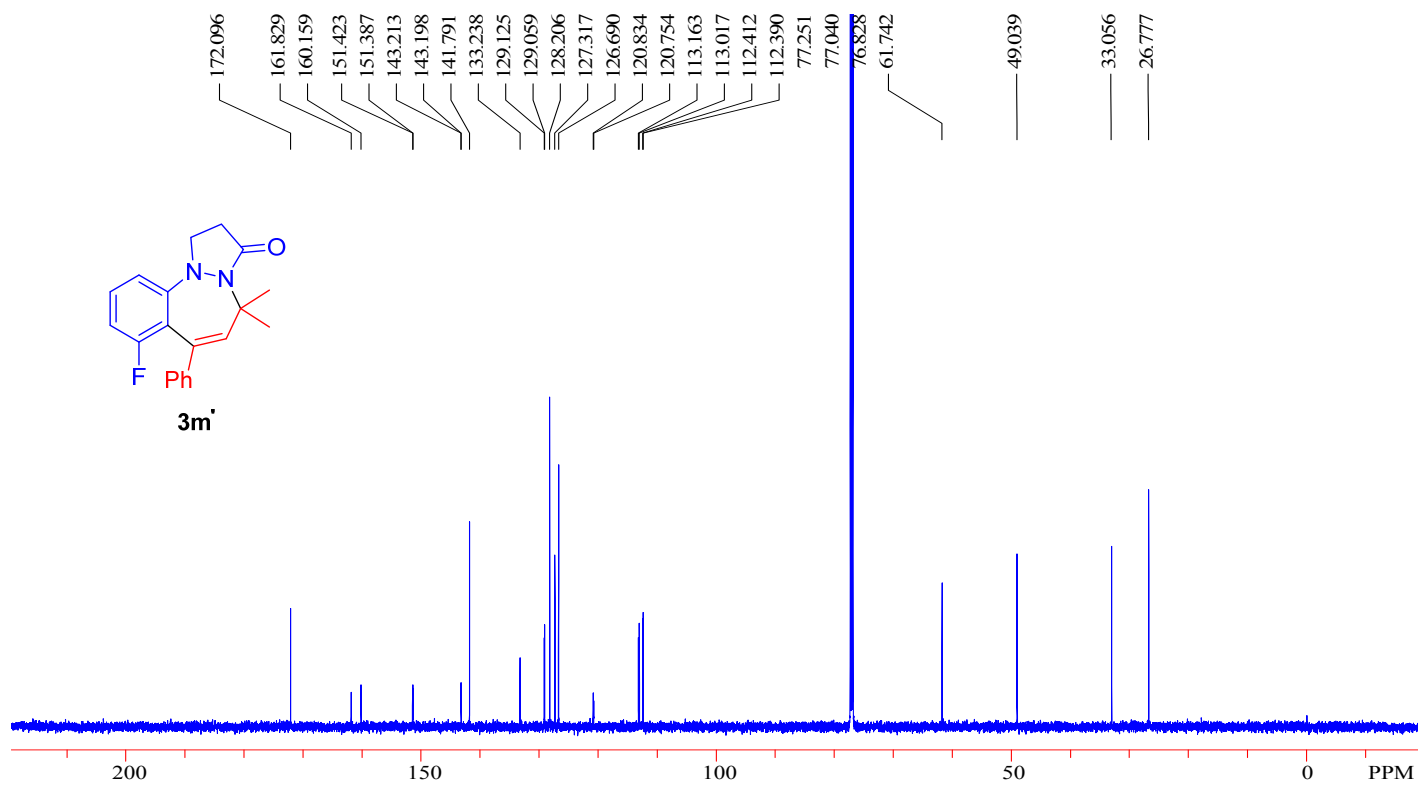

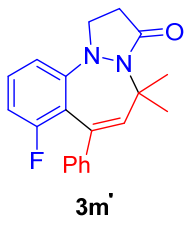

101.944  
101.959  
101.970  
101.989

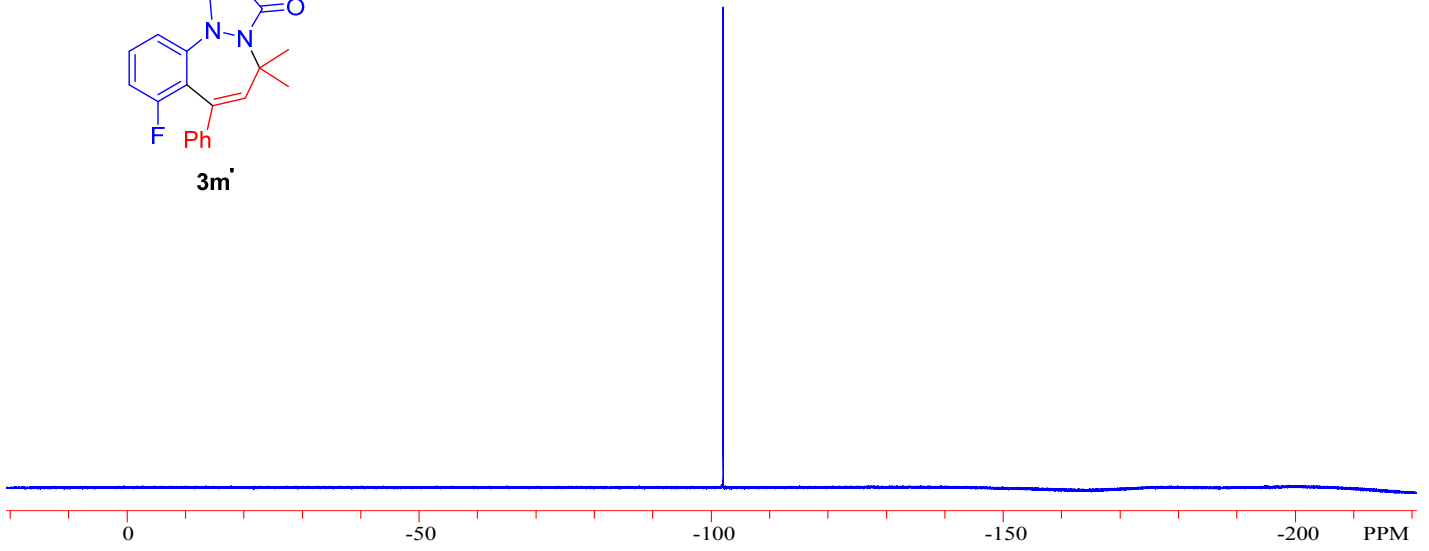

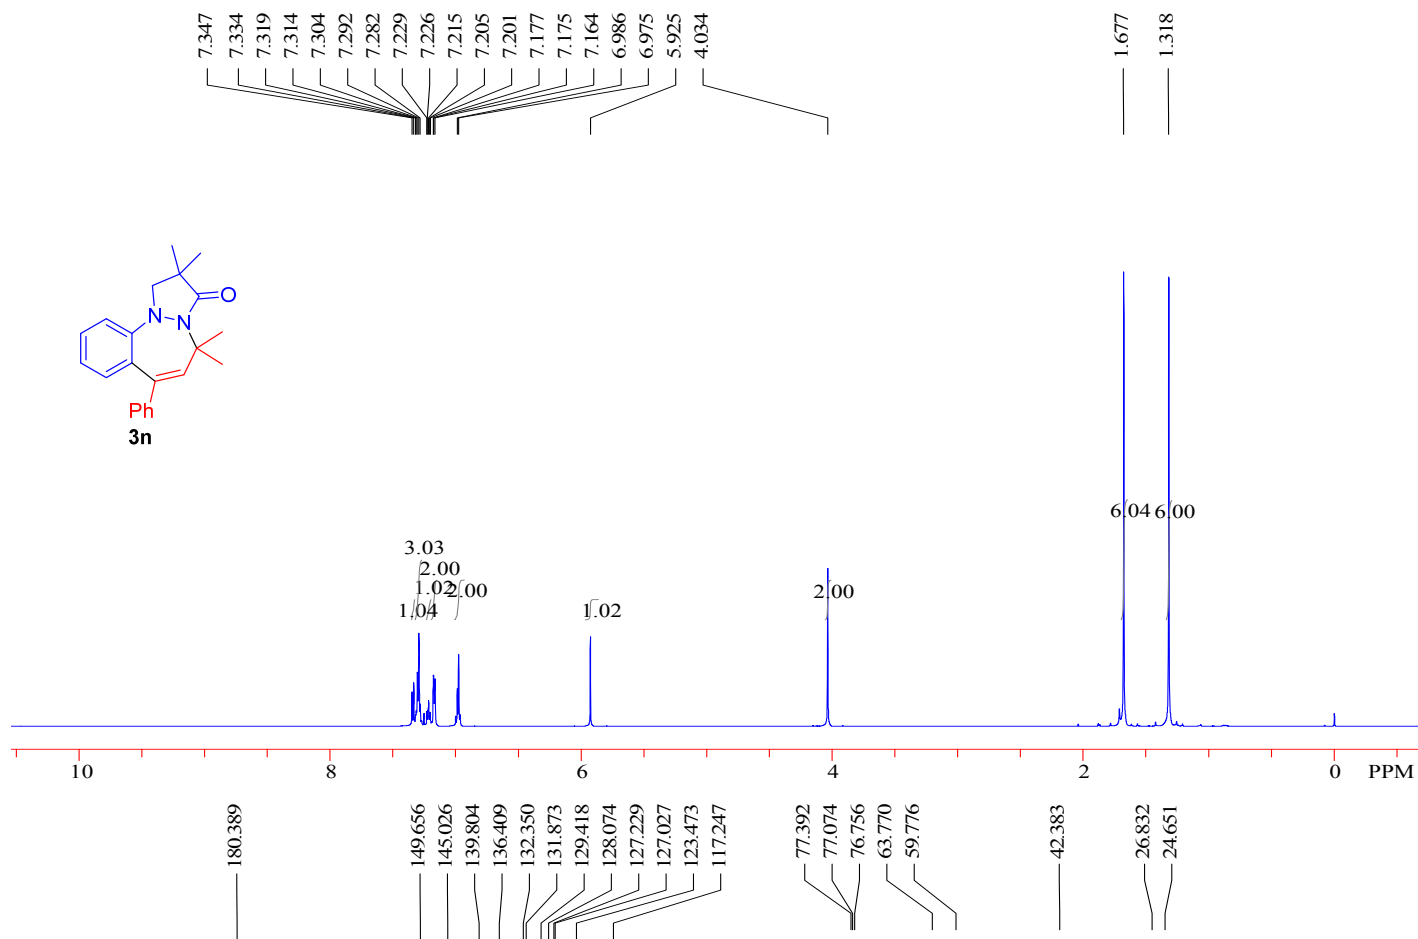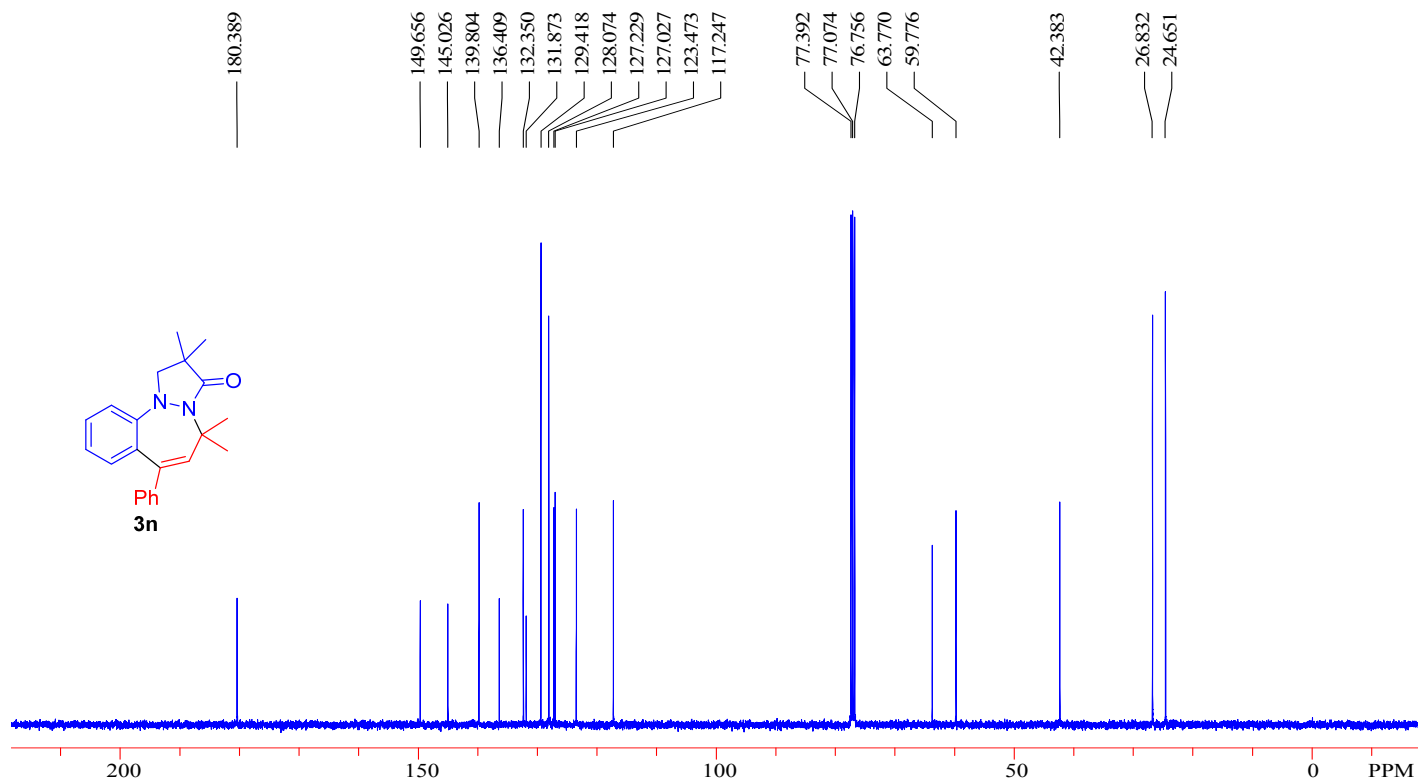

7.253  
7.251  
7.246  
7.243  
7.123  
7.110  
7.087  
7.073  
7.059  
7.052  
7.046  
7.040  
7.038  
7.032  
7.025  
7.013  
5.976  
4.106  
4.093  
4.081  
2.777  
2.765  
2.753  
2.355  
1.659

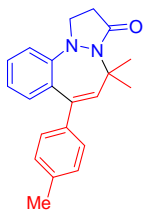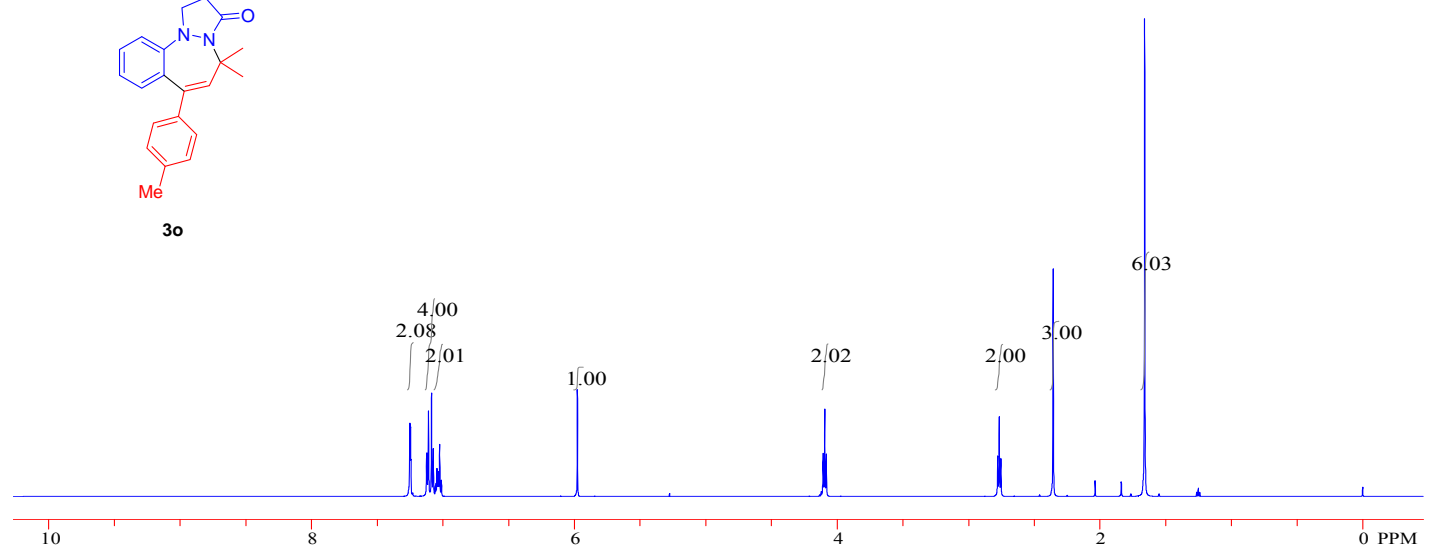

173.474  
149.520  
141.558  
139.414  
137.102  
136.366  
132.778  
132.144  
129.162  
128.826  
127.791  
124.415  
116.270  
77.324  
77.113  
76.901  
62.967  
49.003  
33.296  
26.909  
21.163

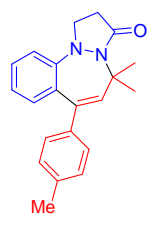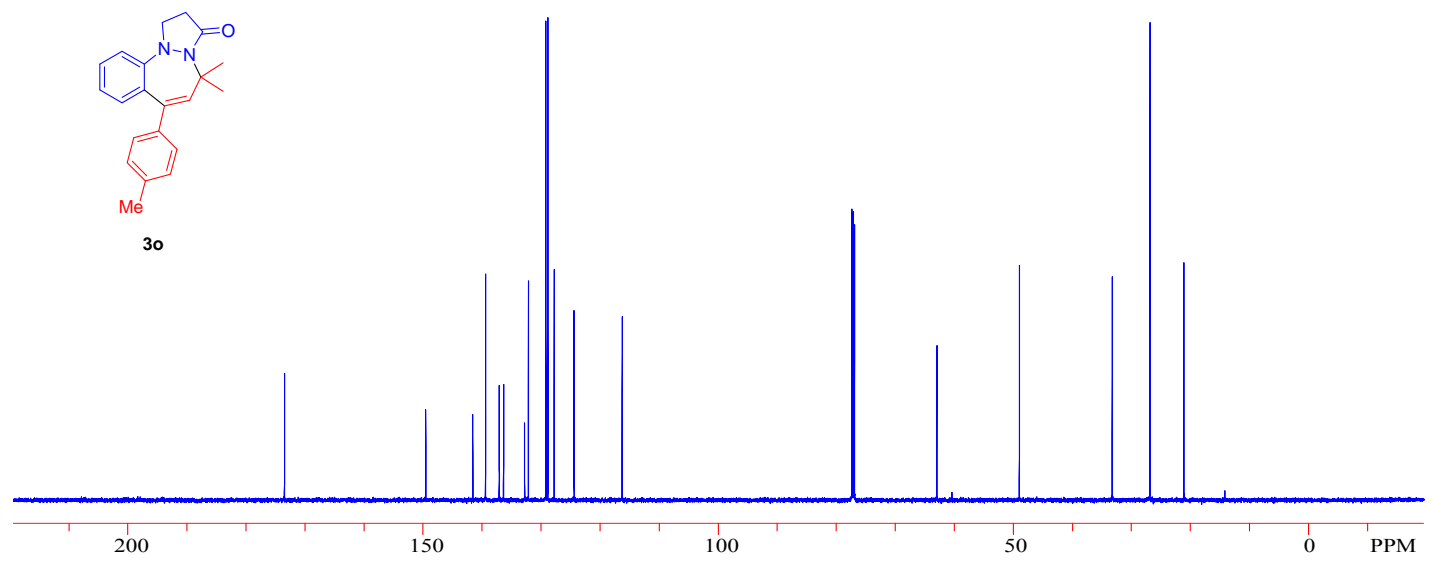

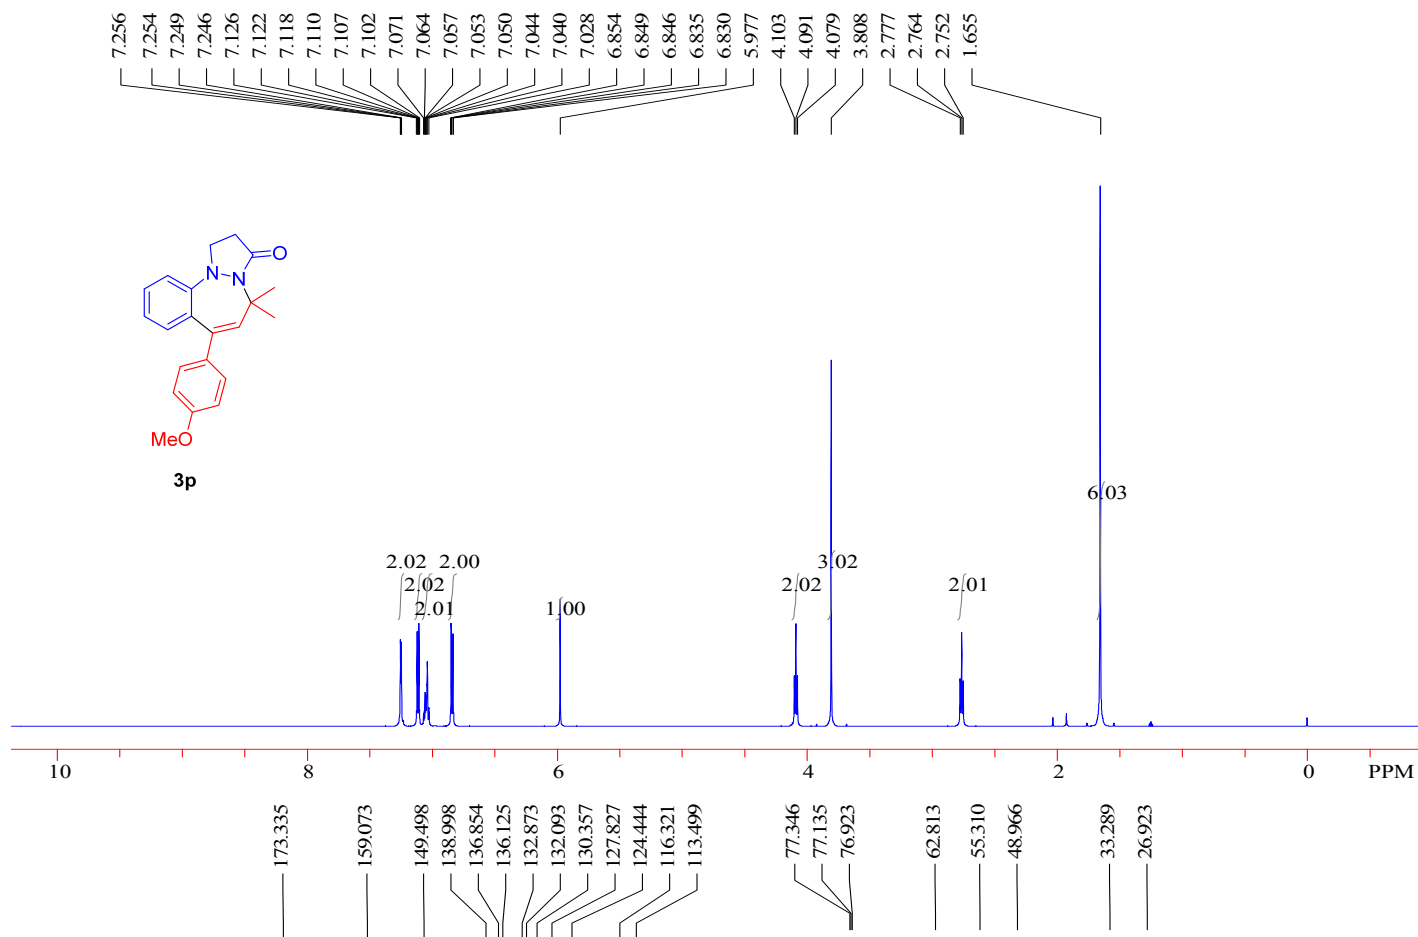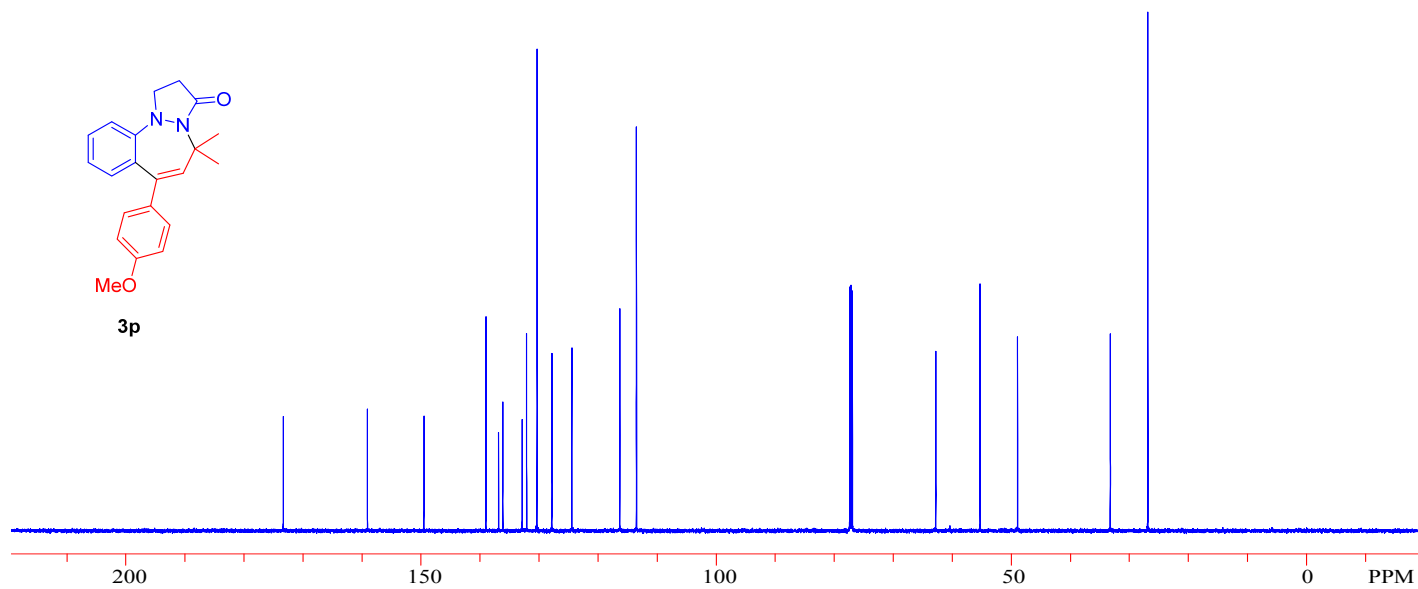

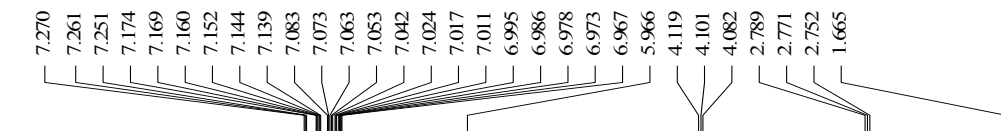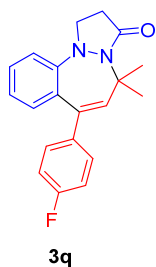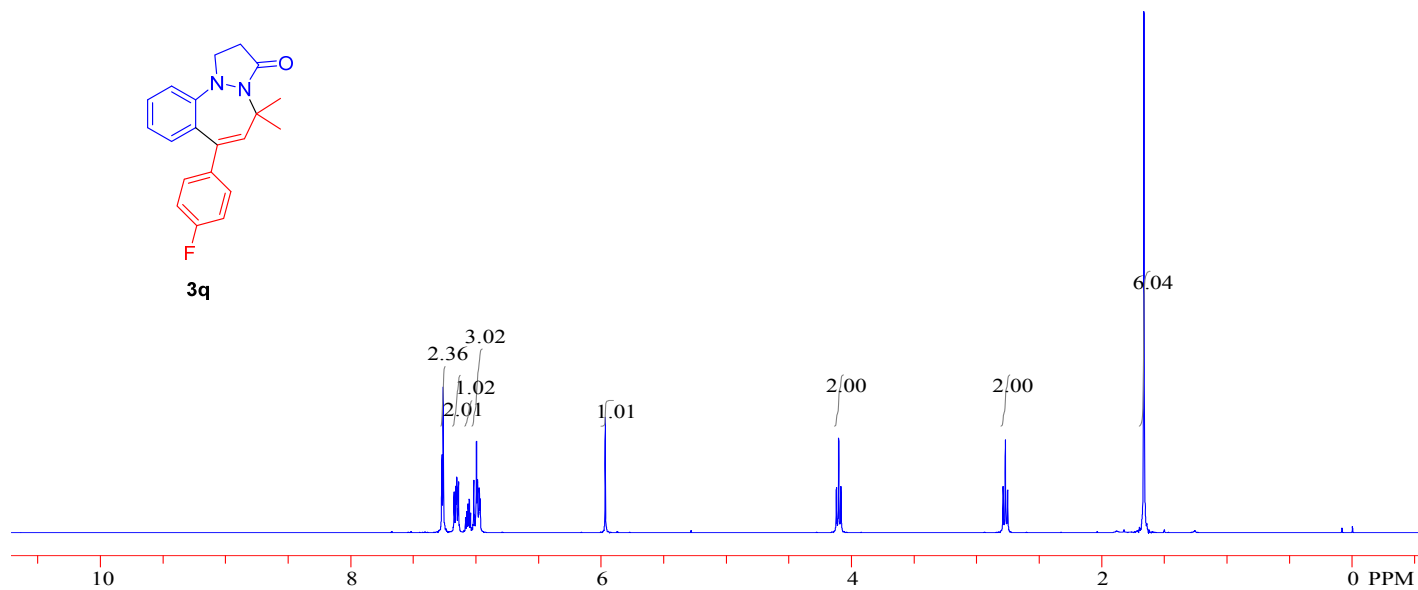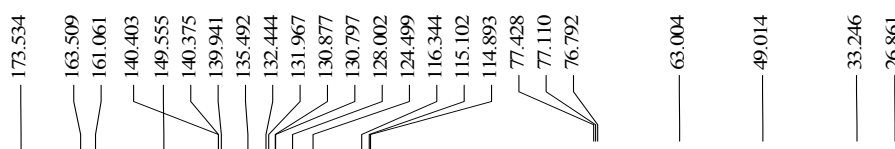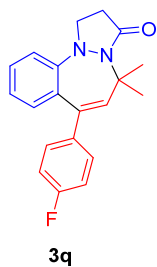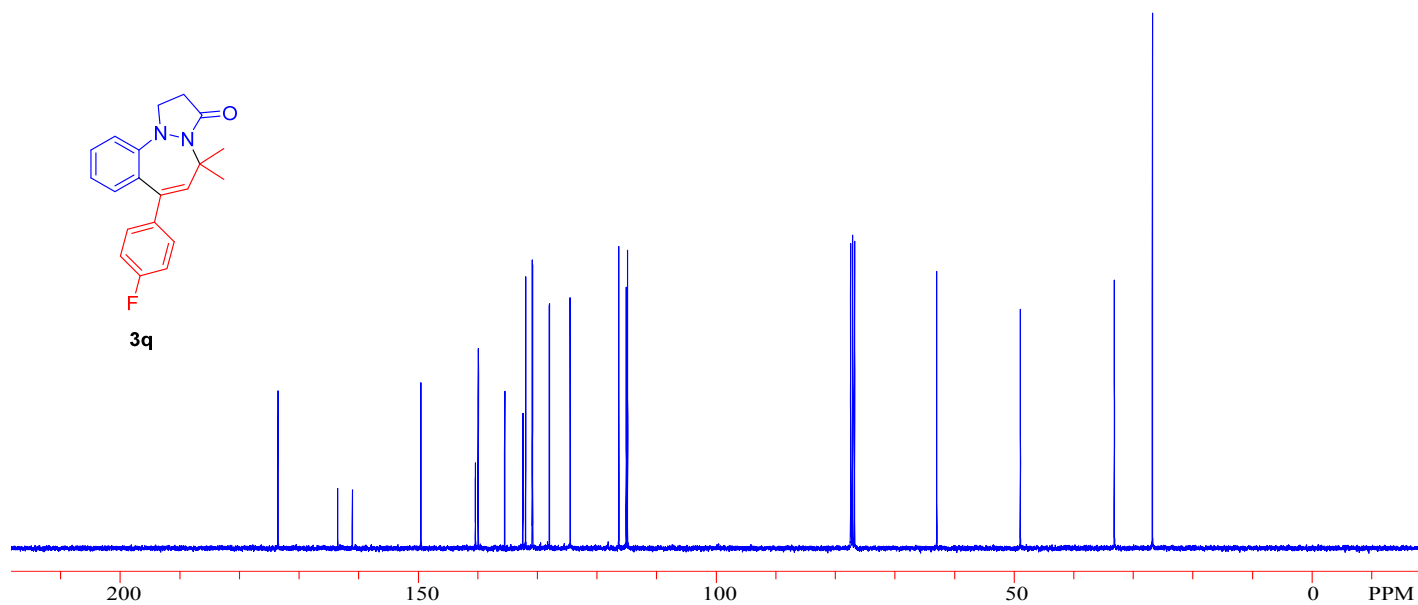

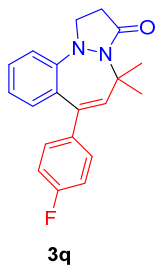

115.056  
115.071  
115.078  
115.085  
115.093  
115.108  
115.115  
115.130

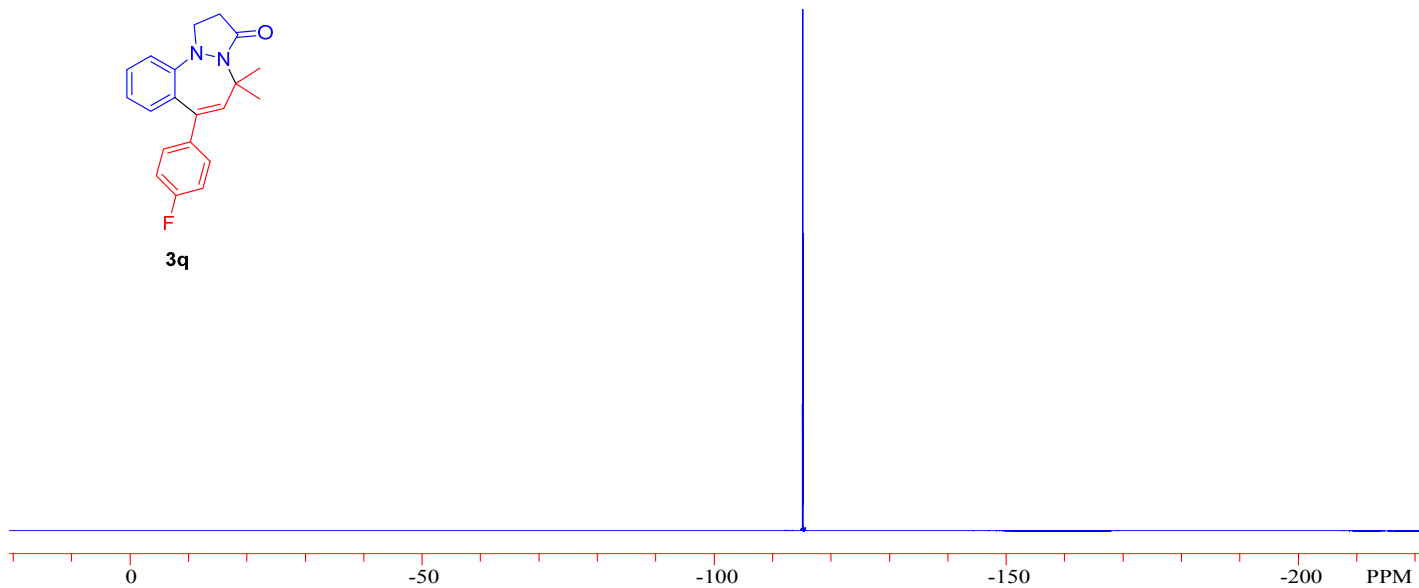

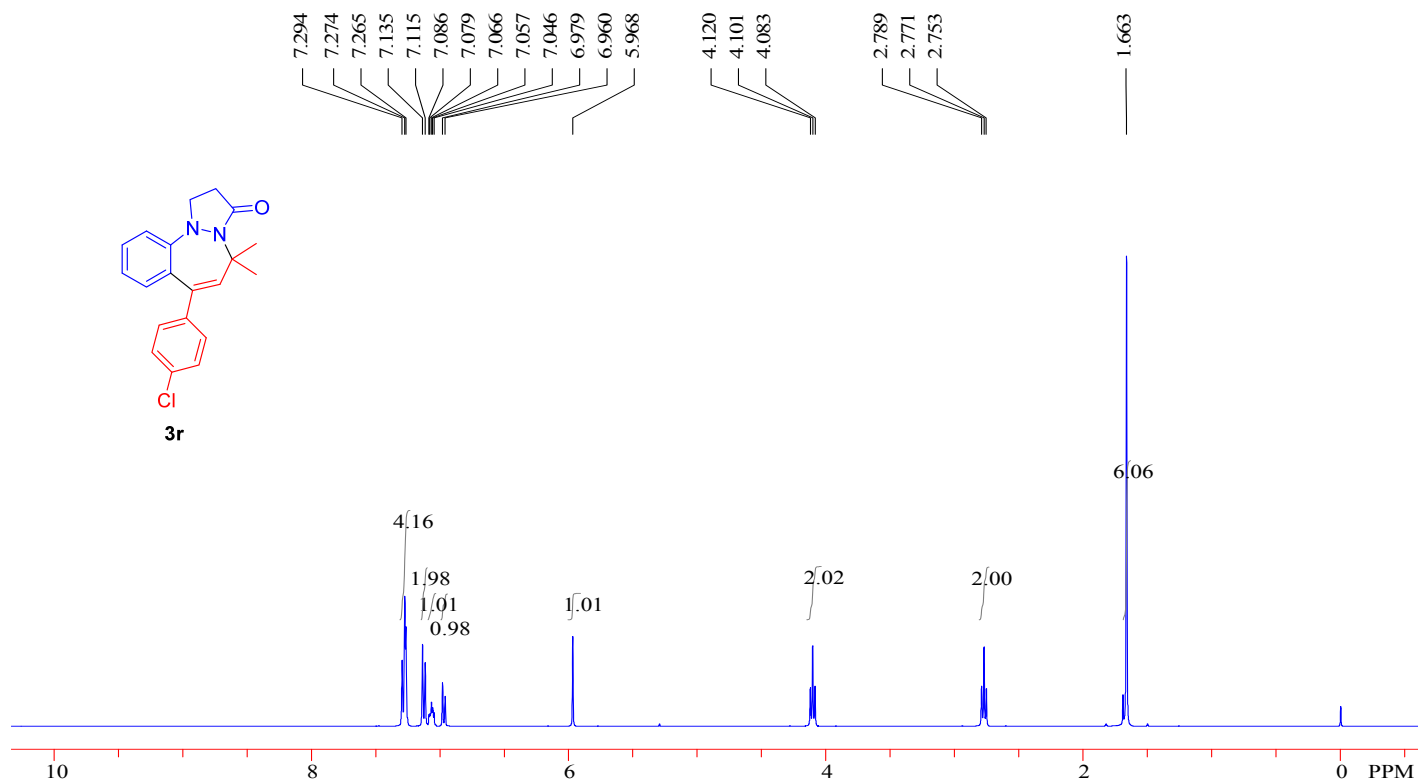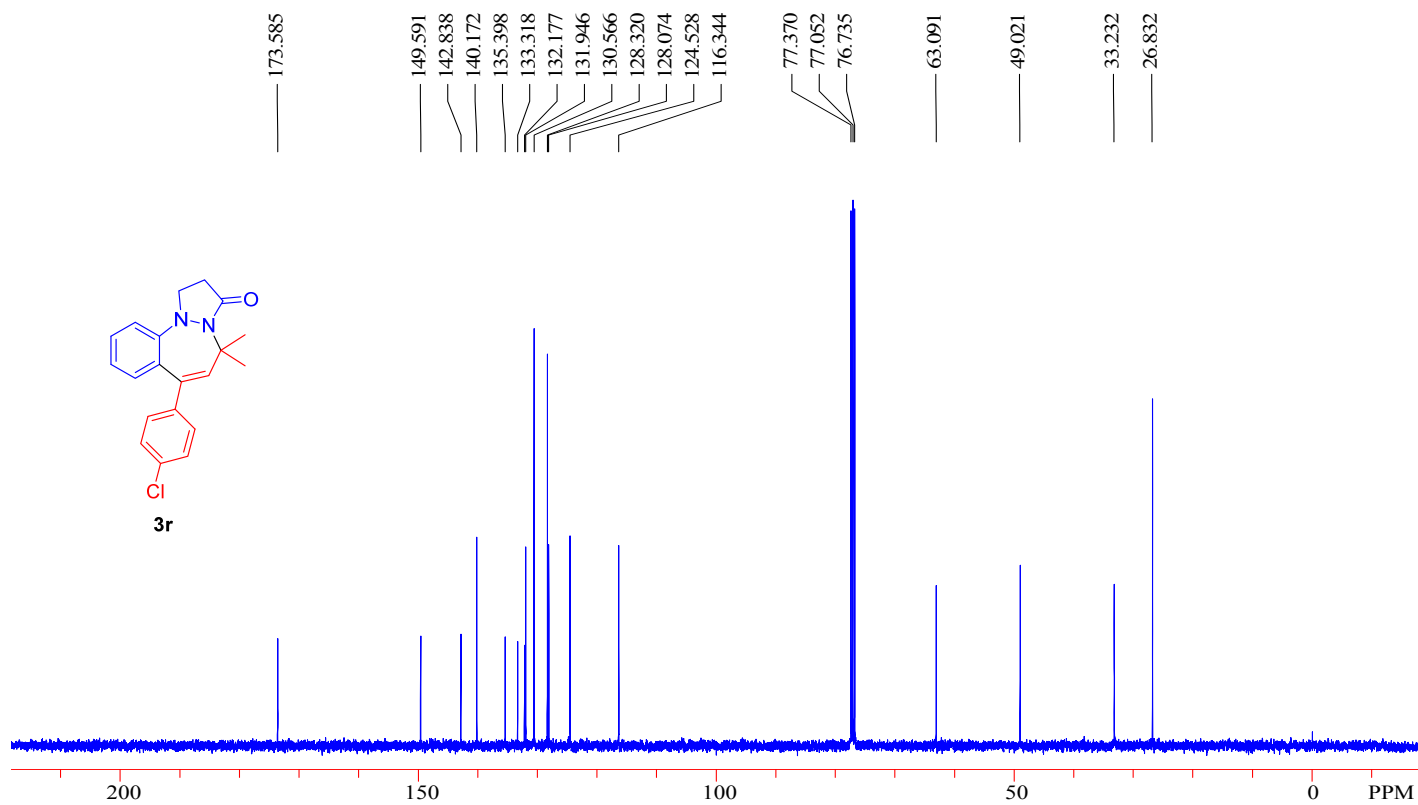



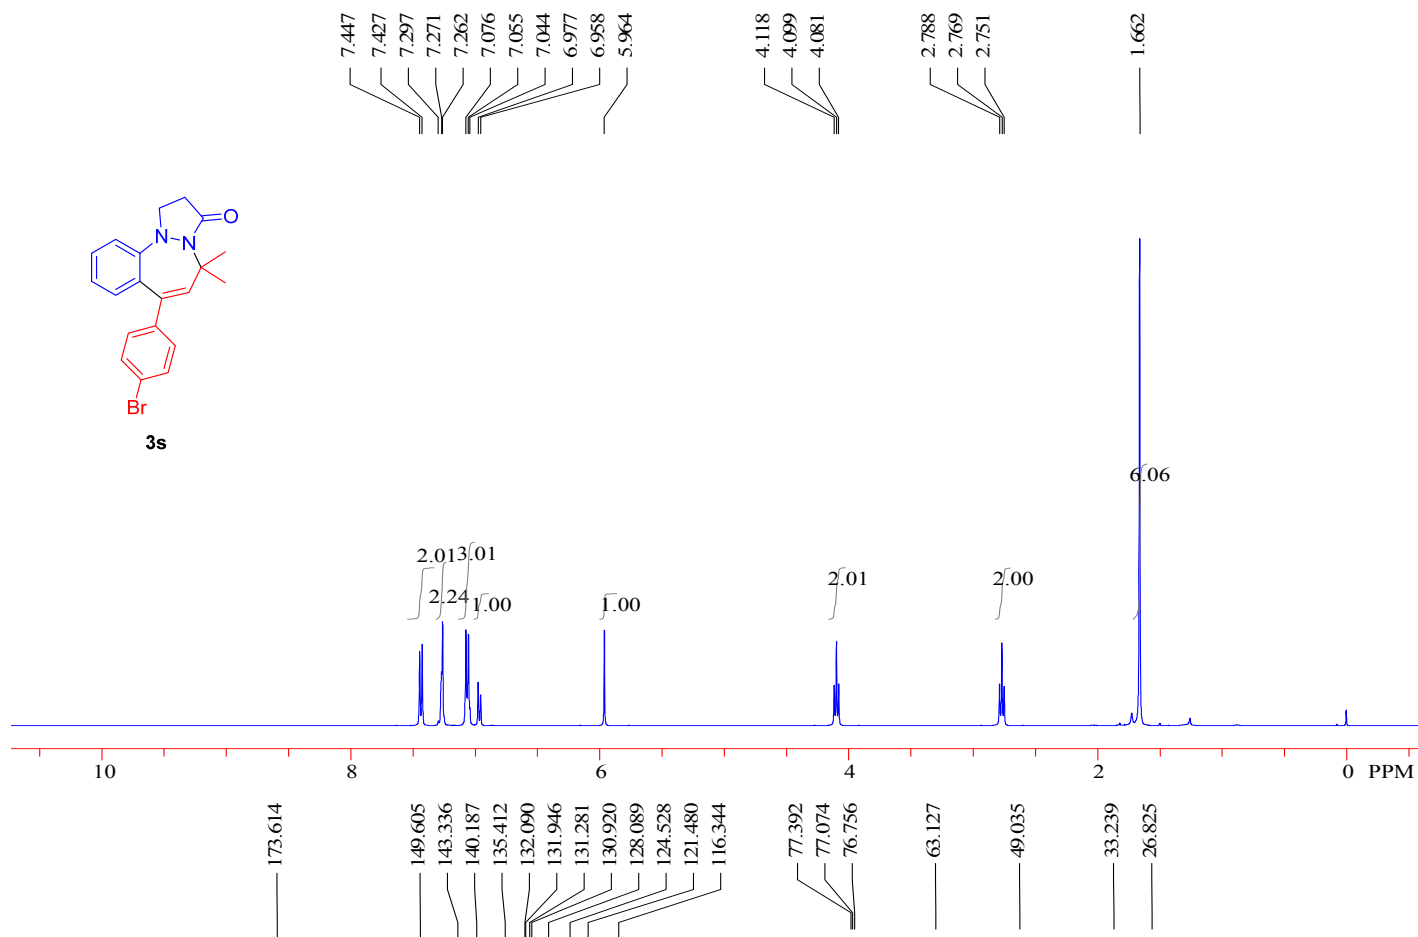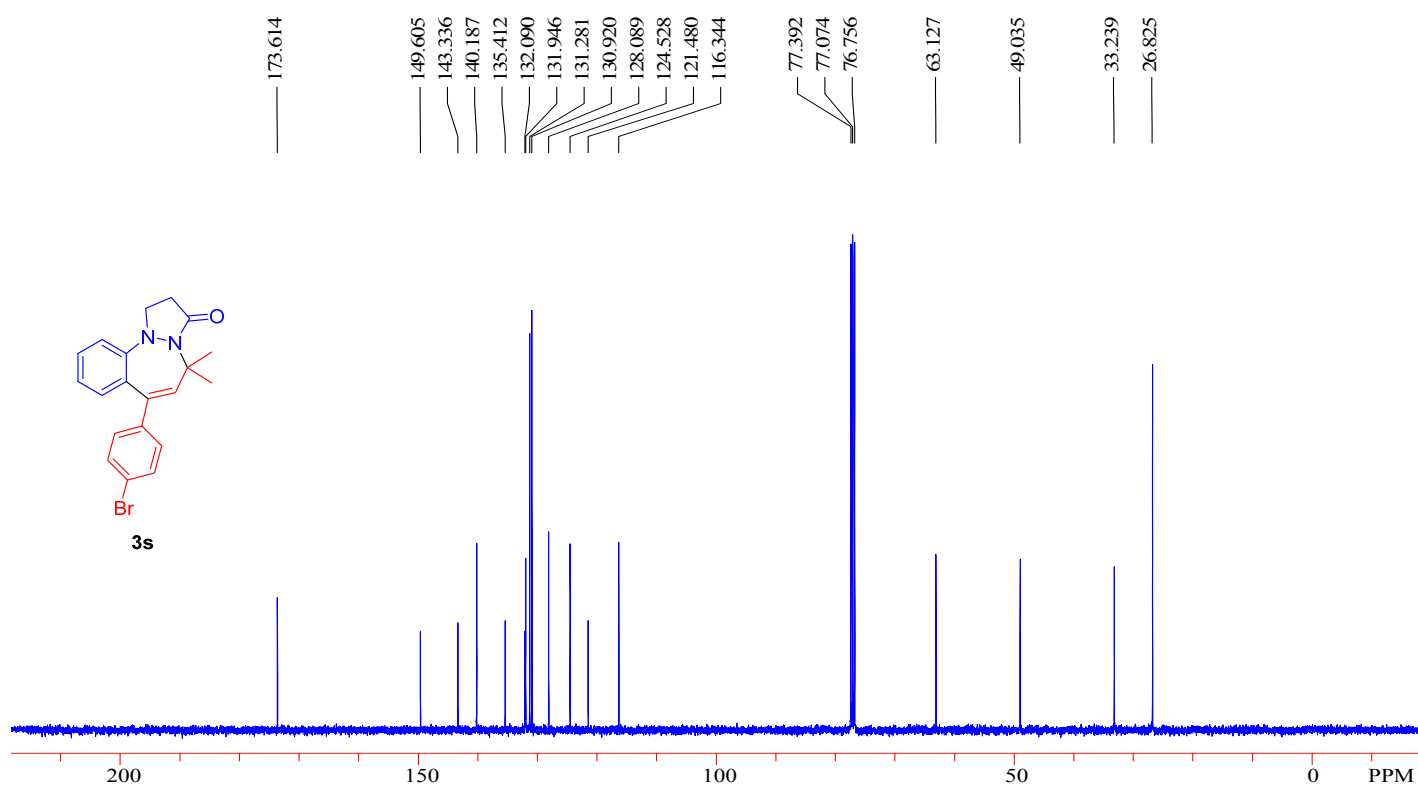

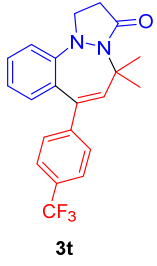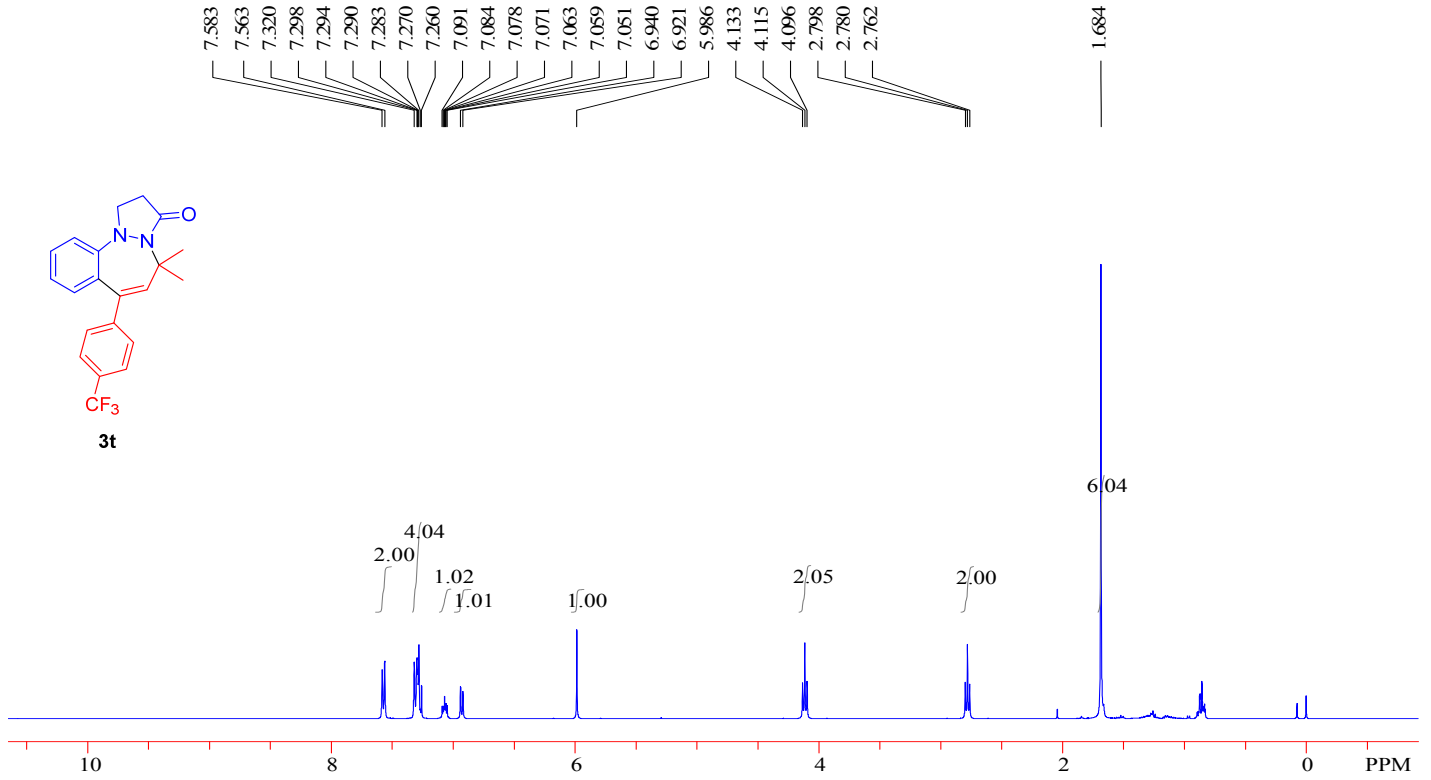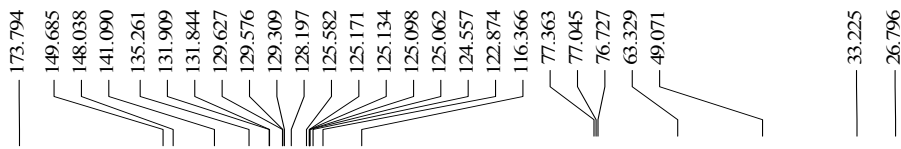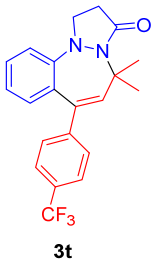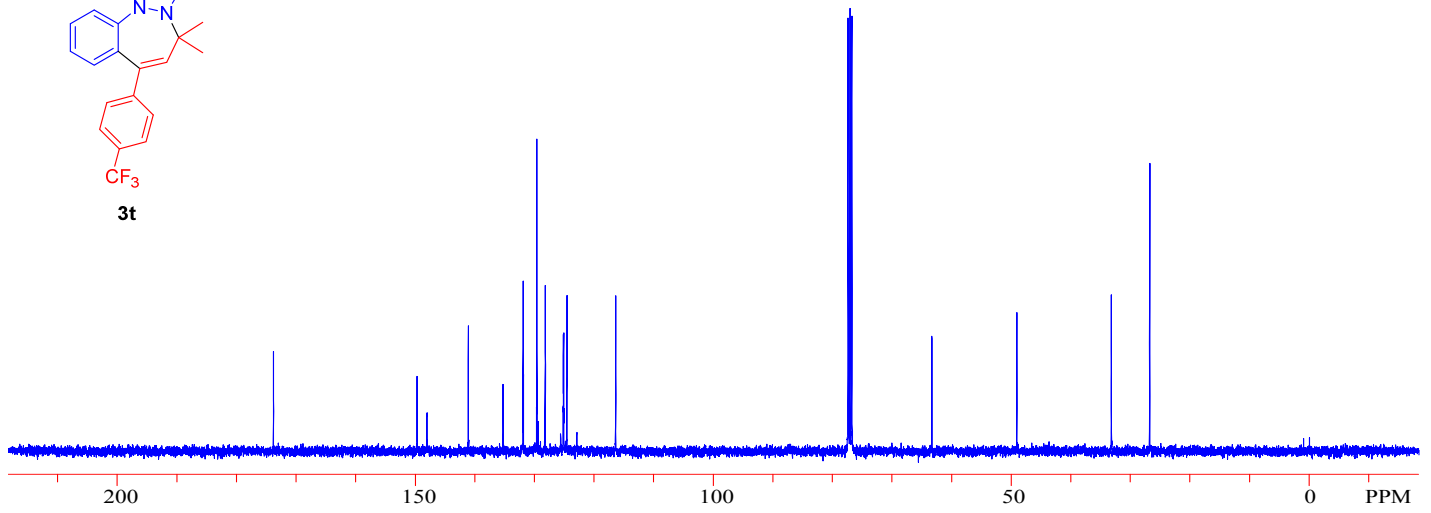

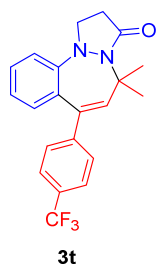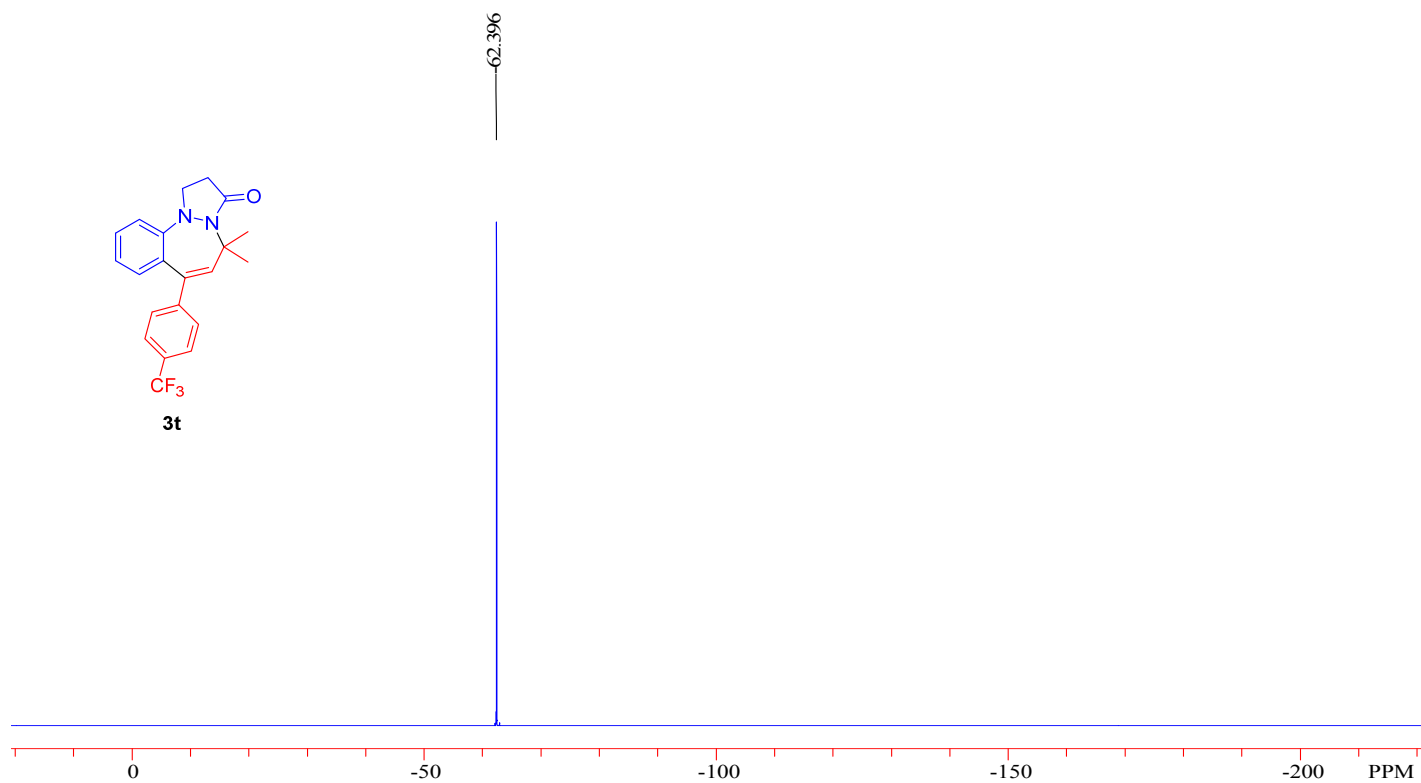

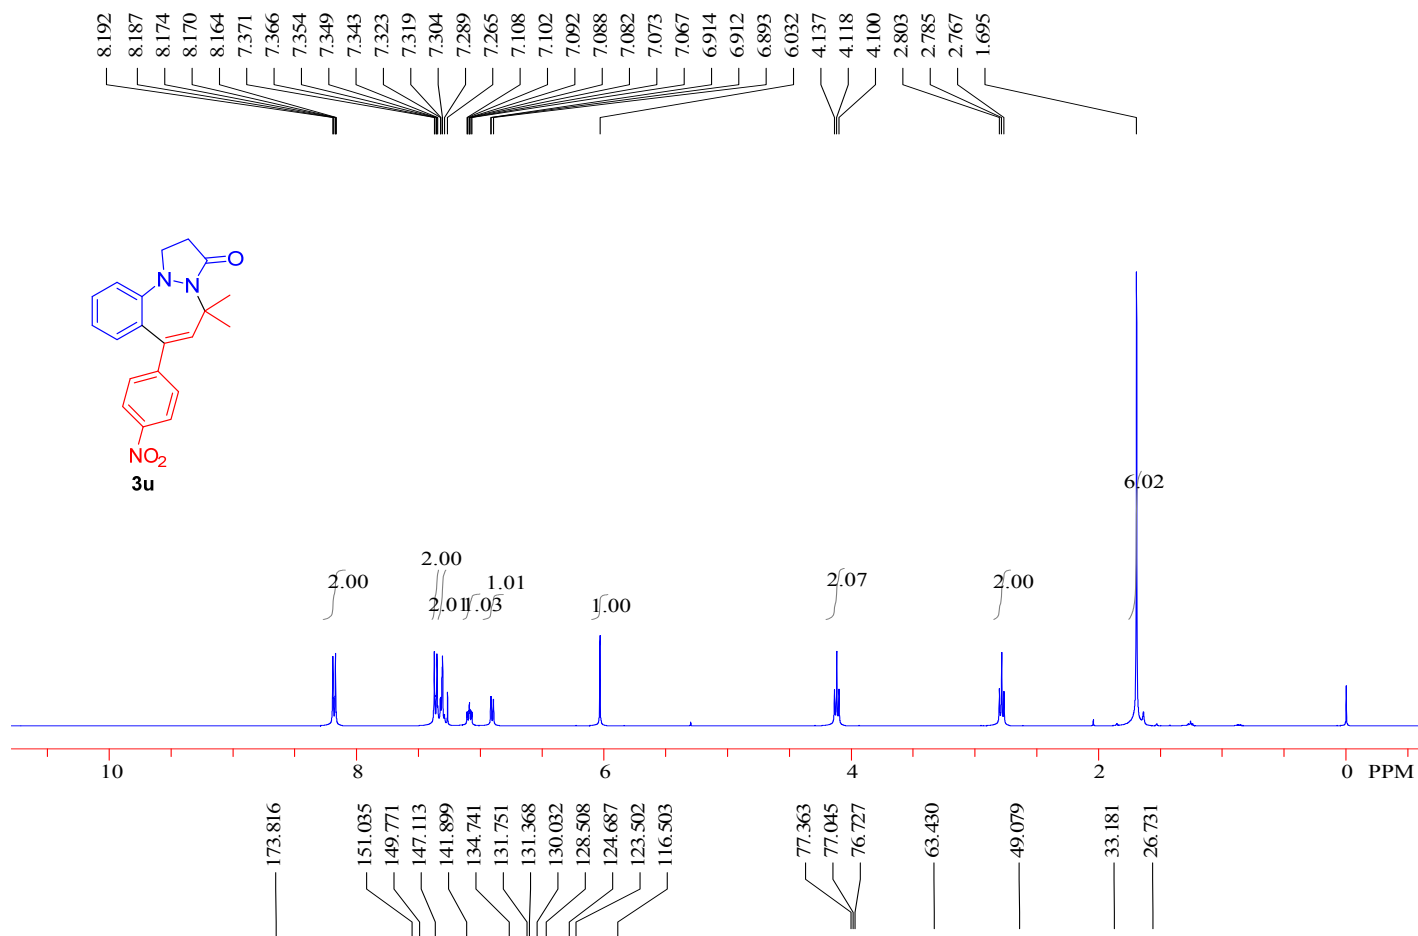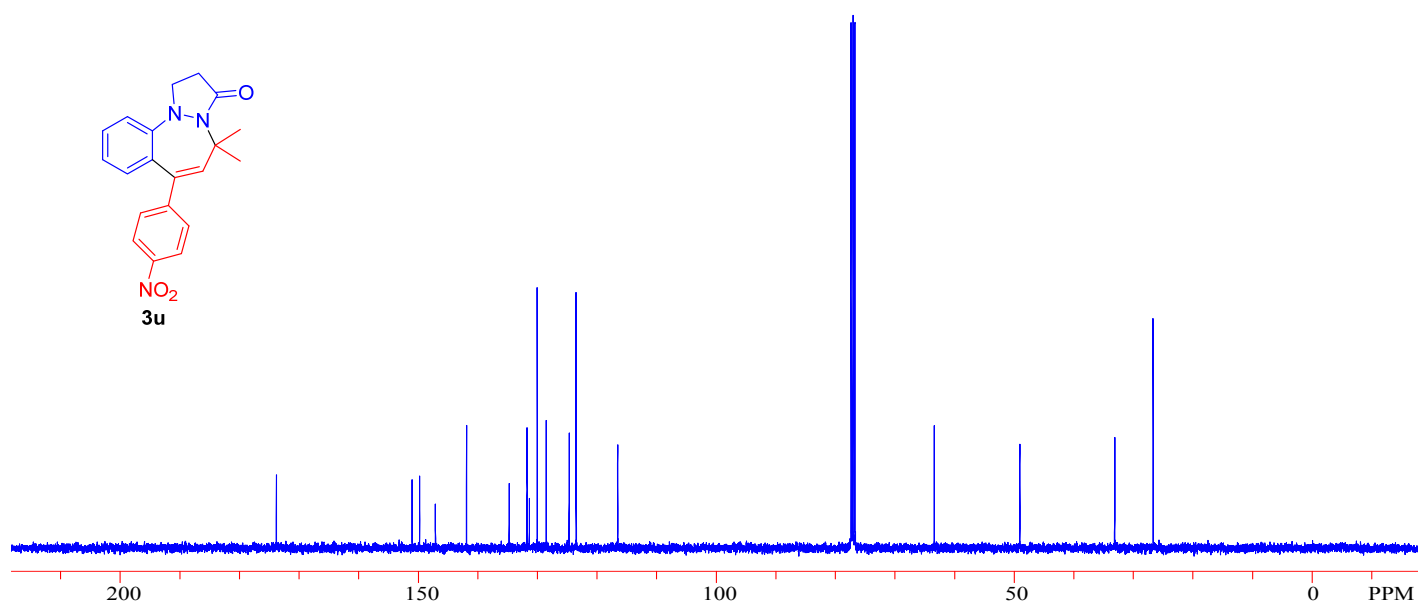

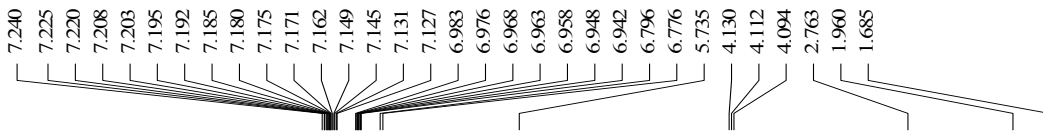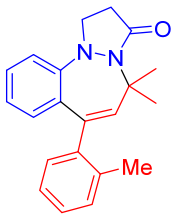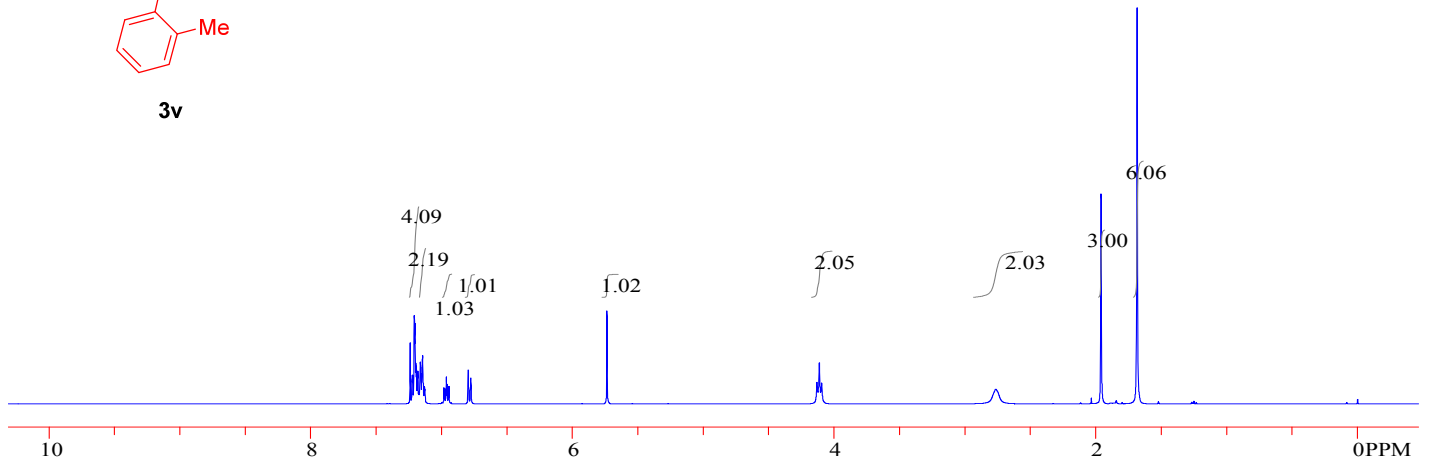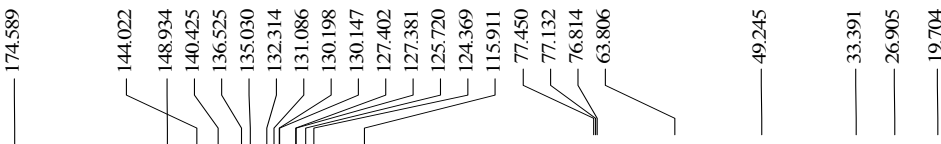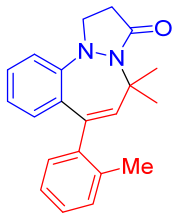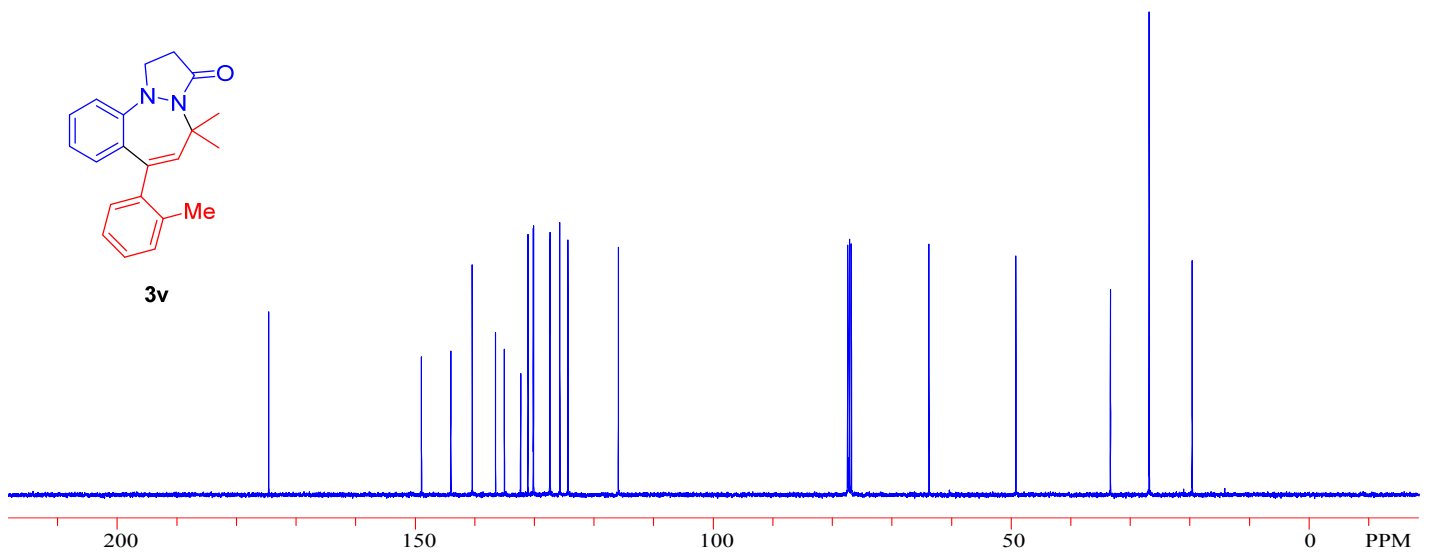

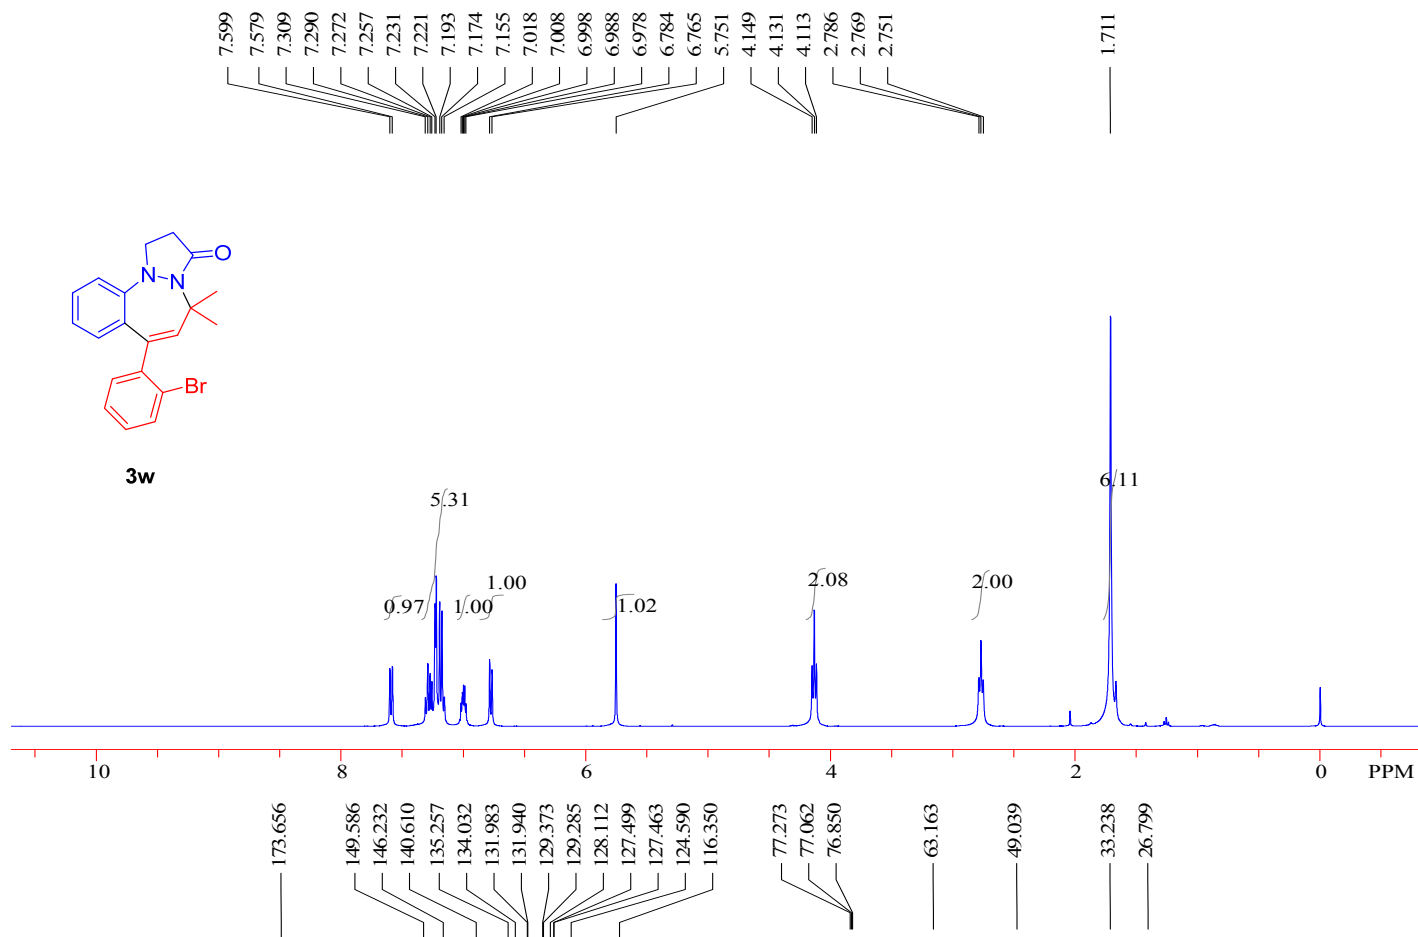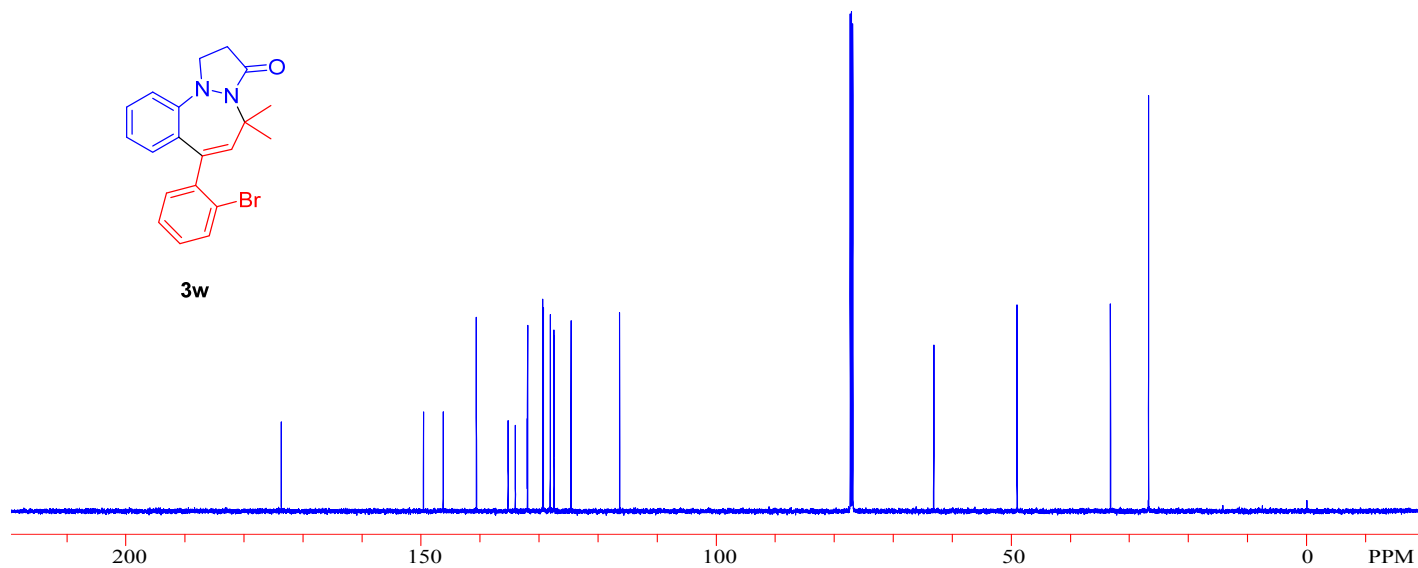

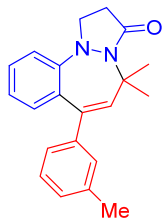

3x

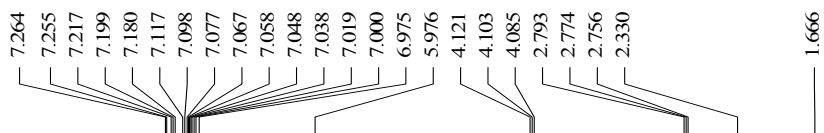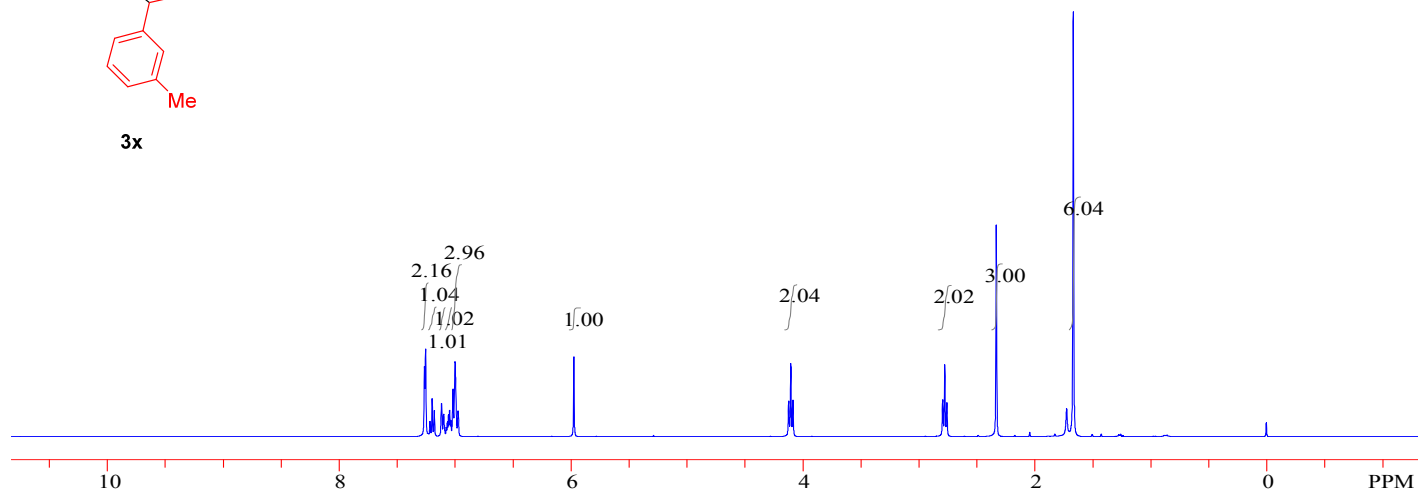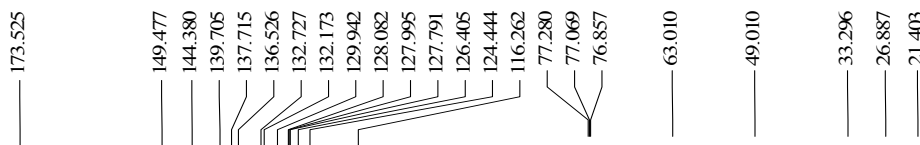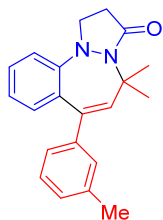

3x

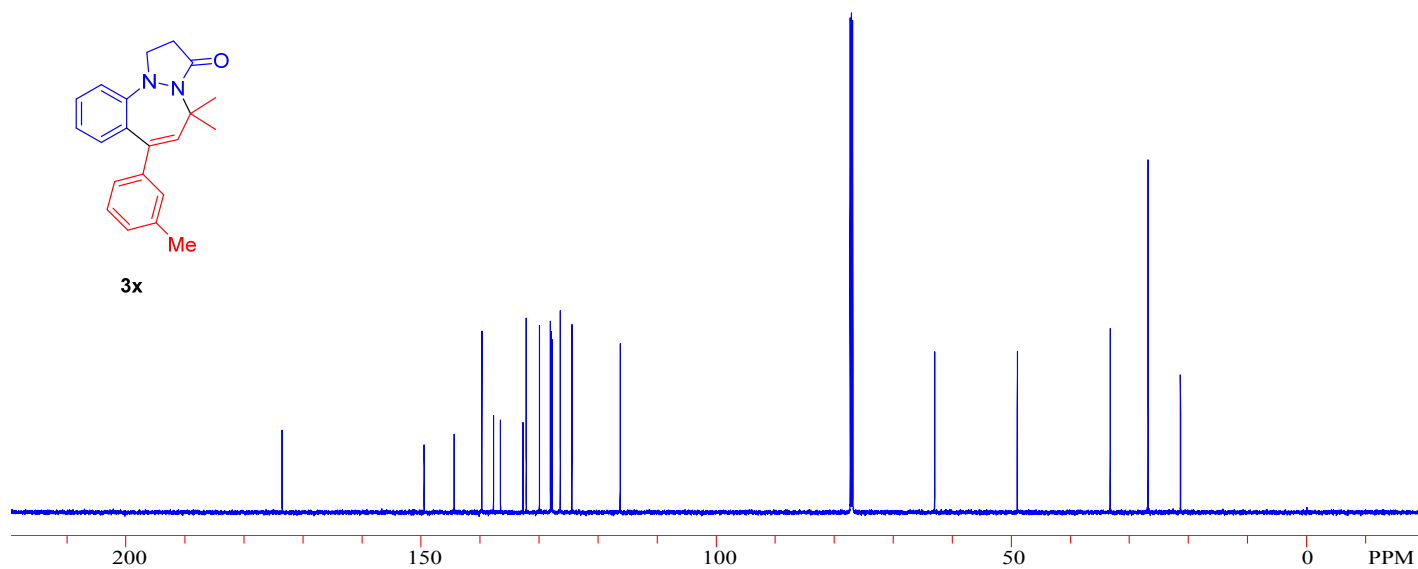

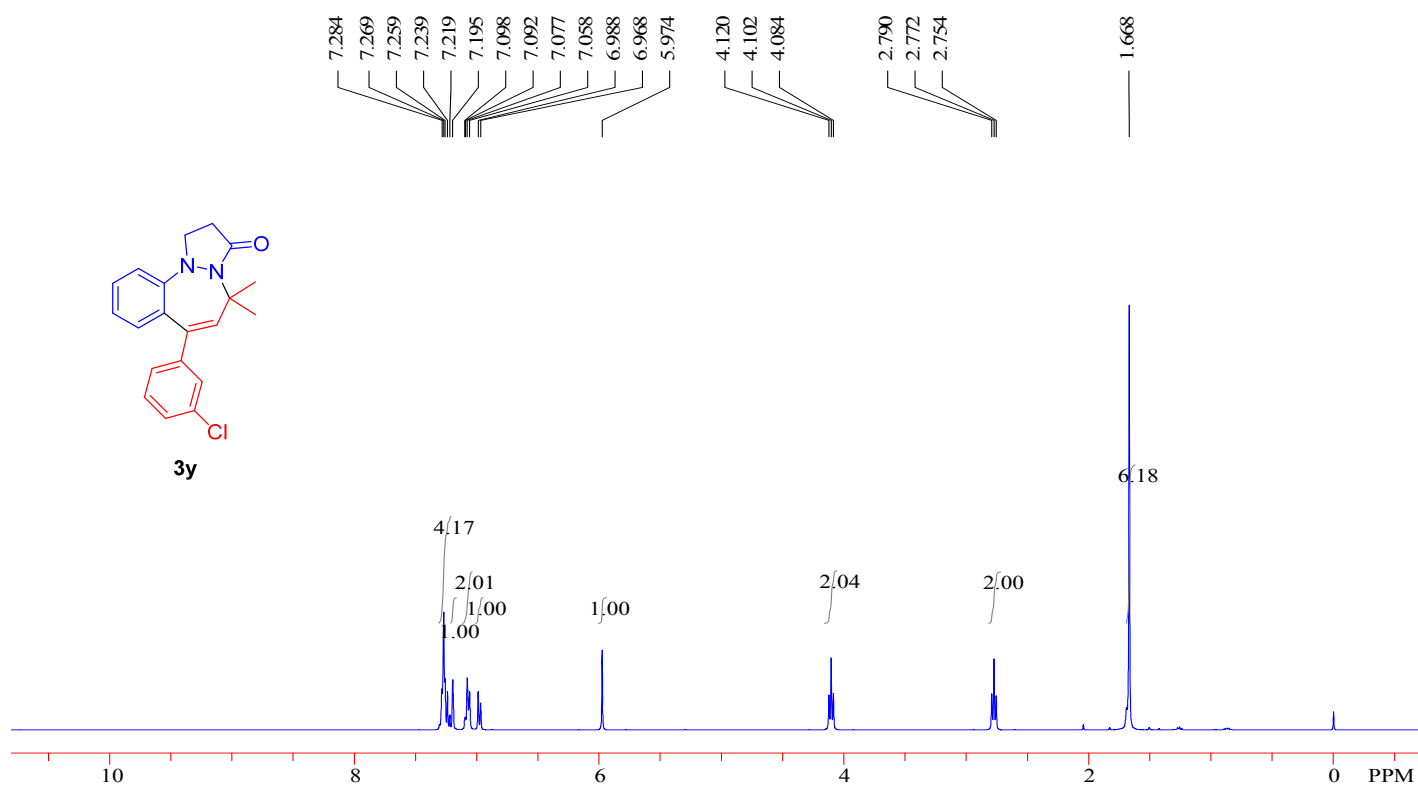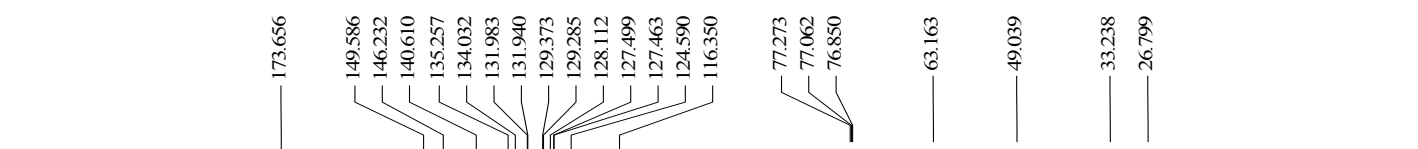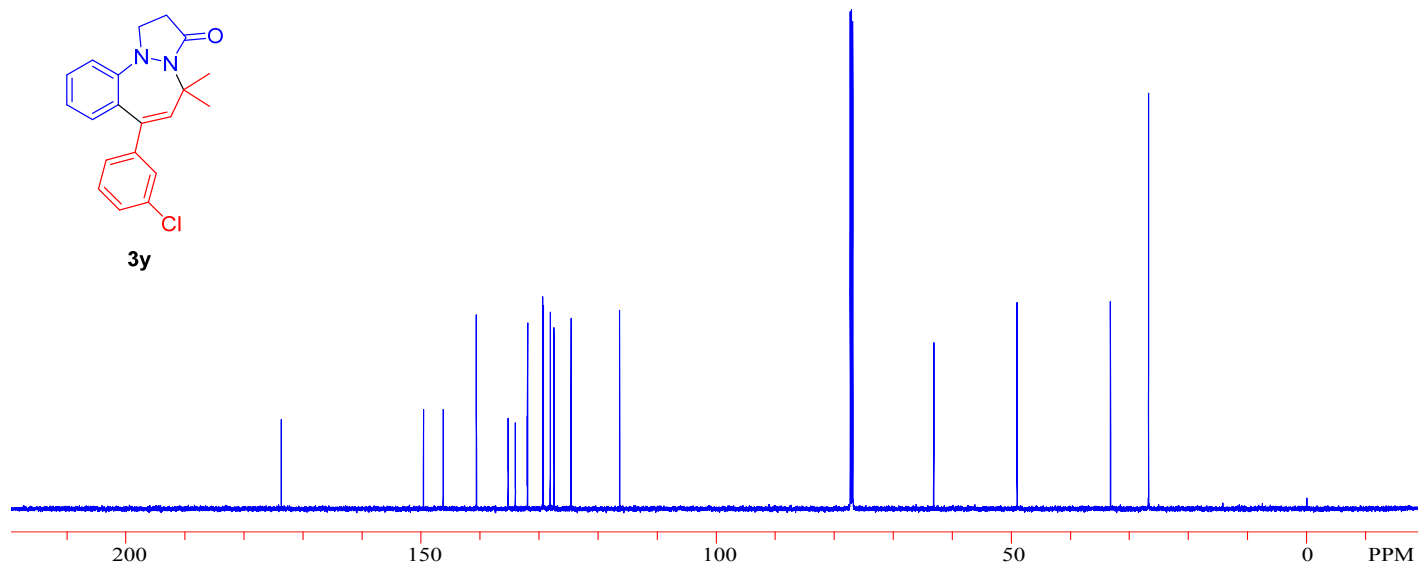



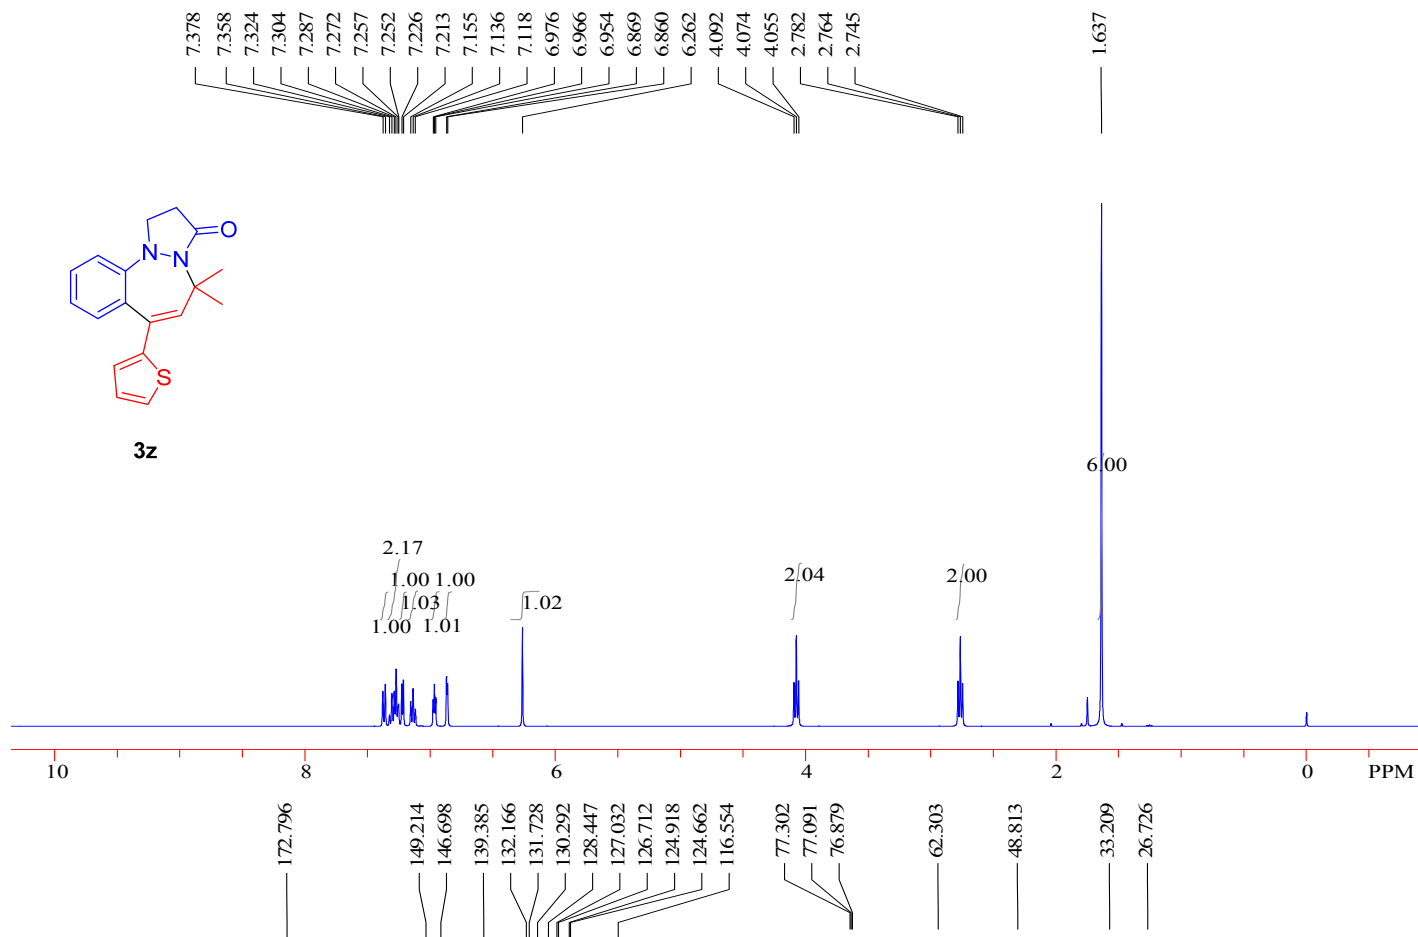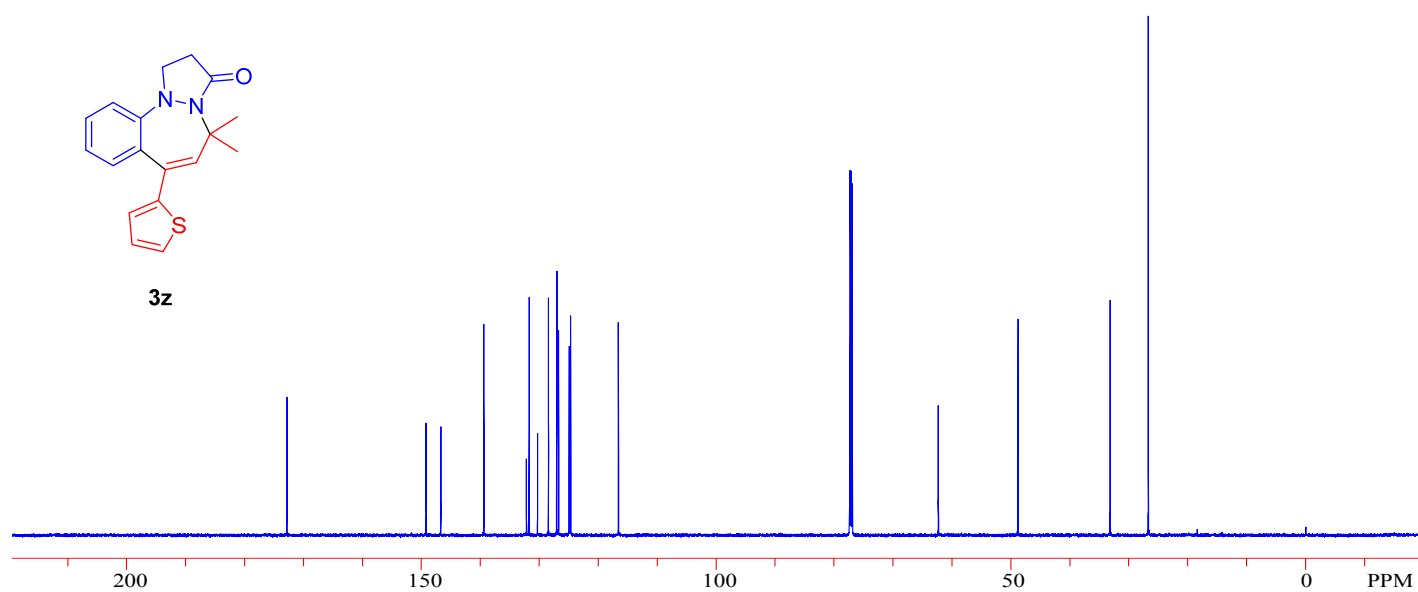

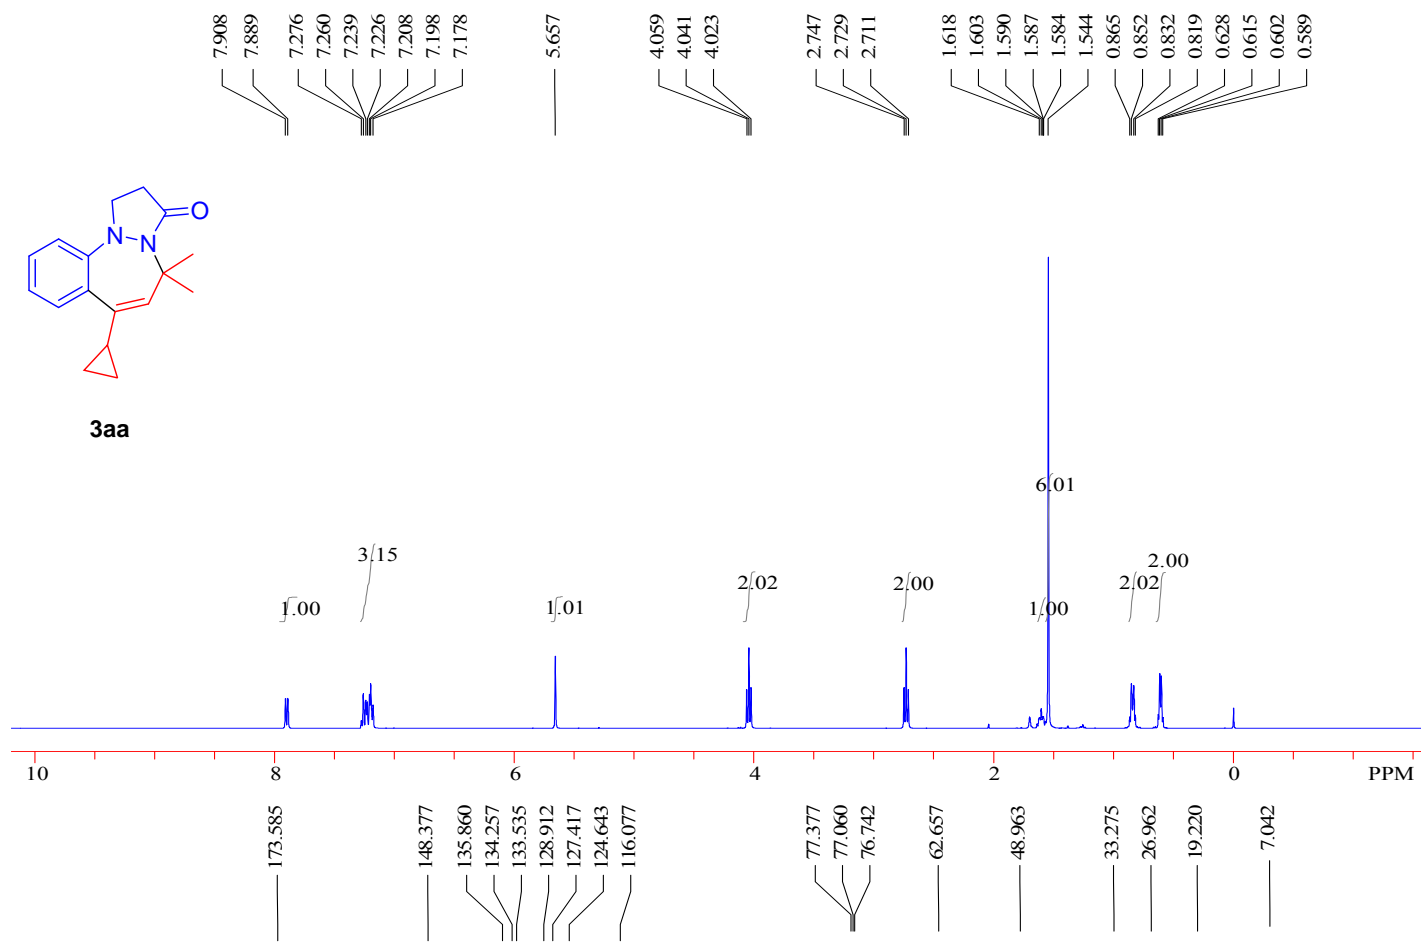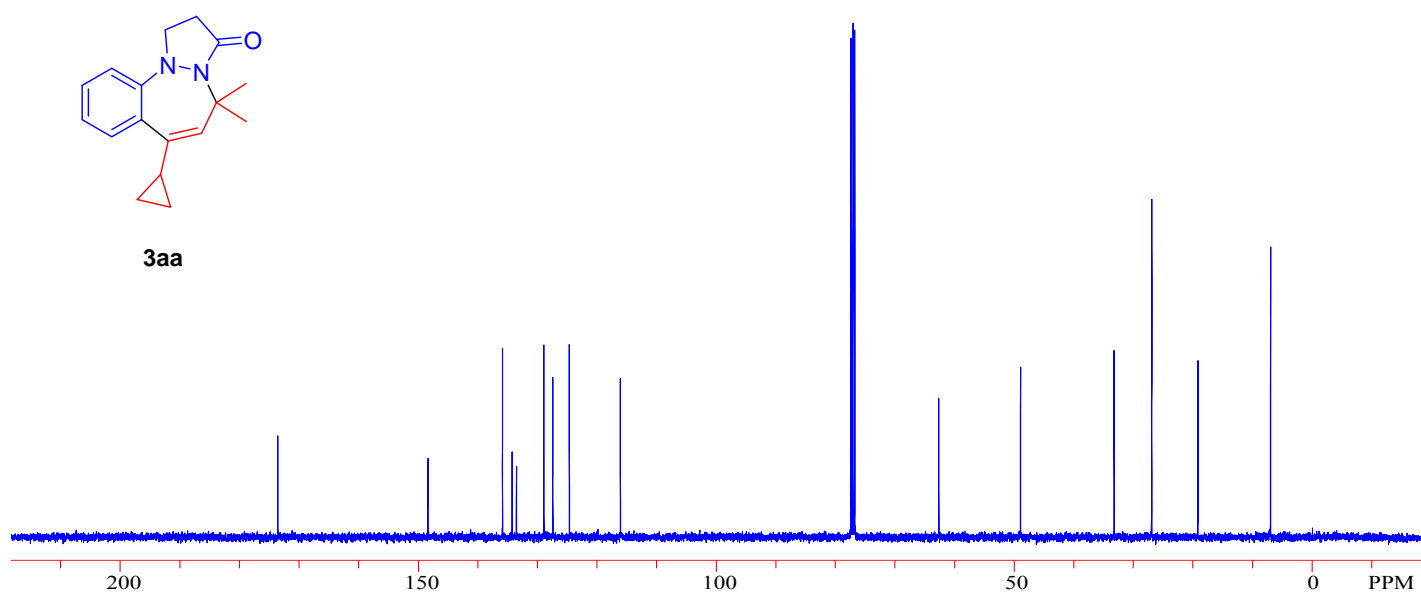

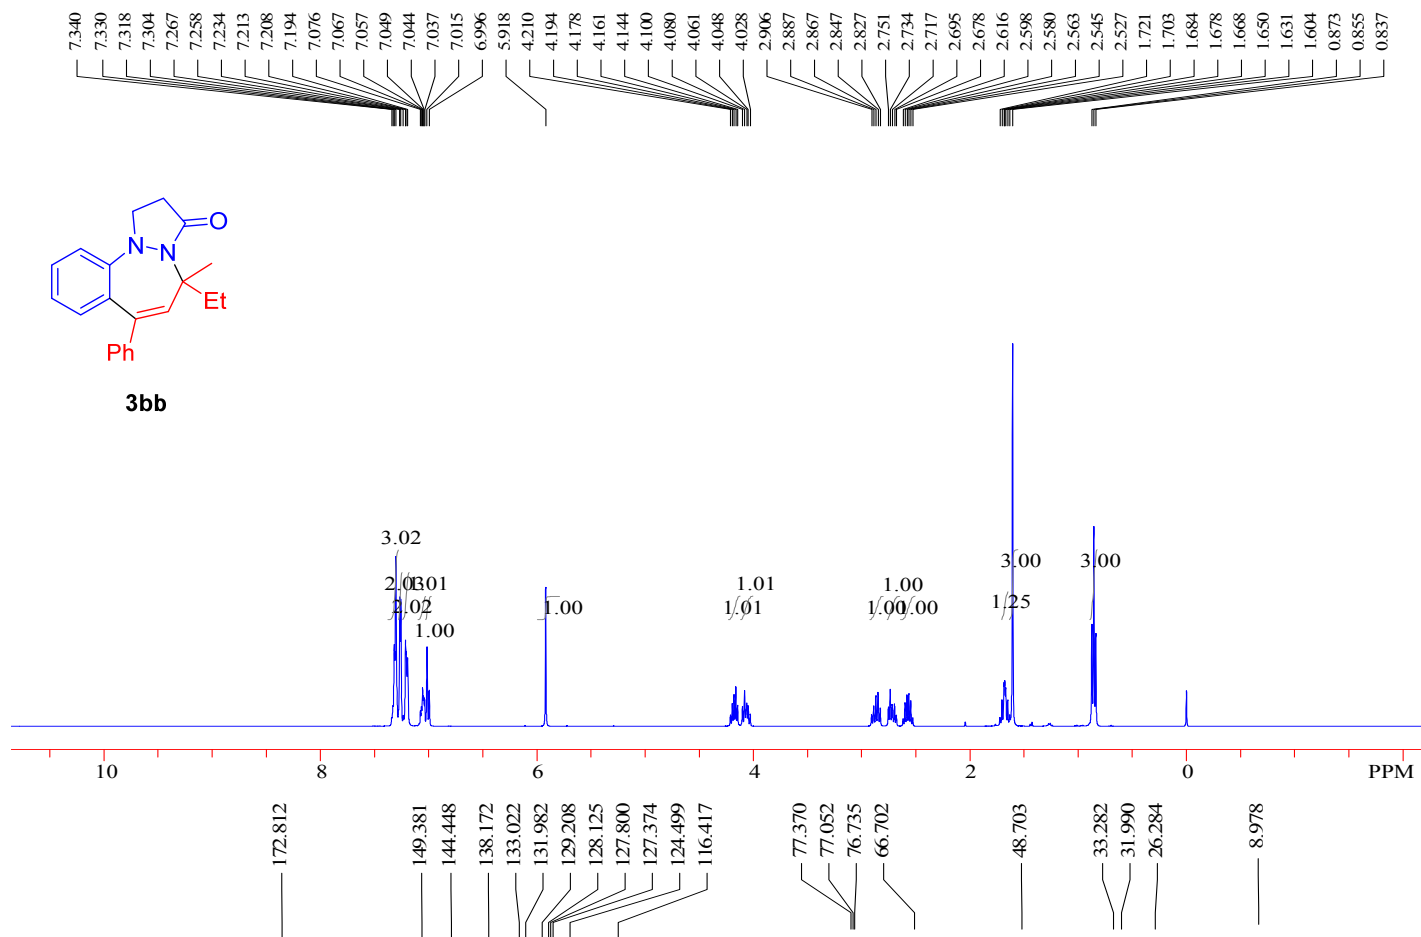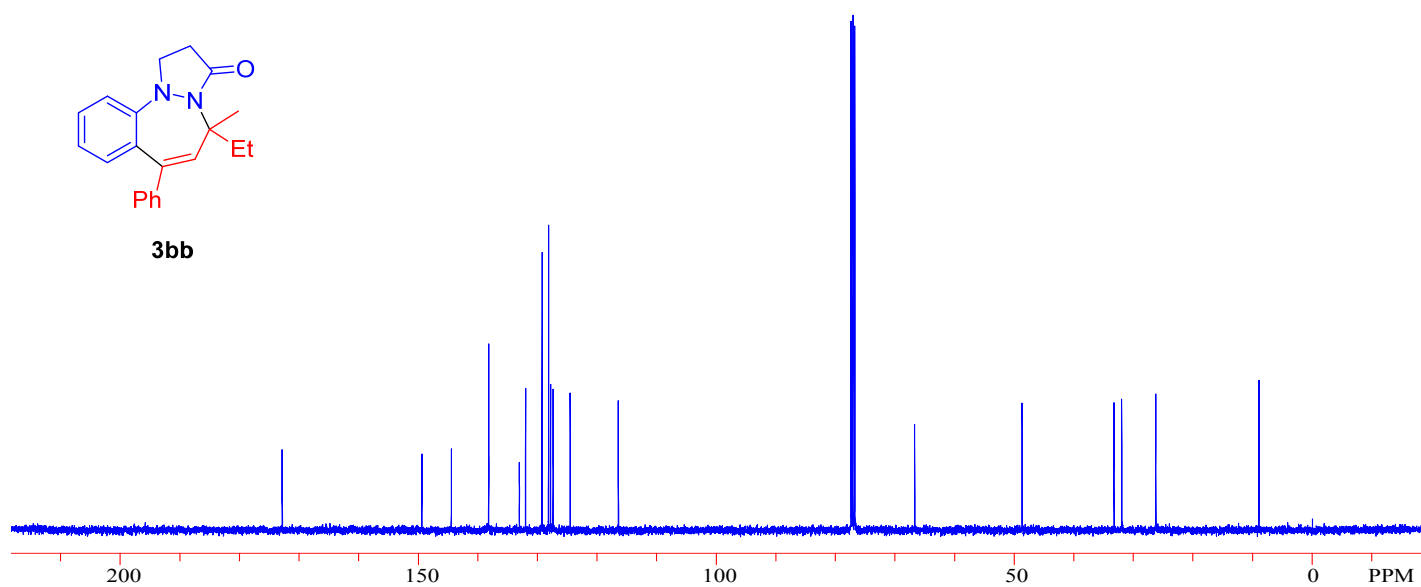

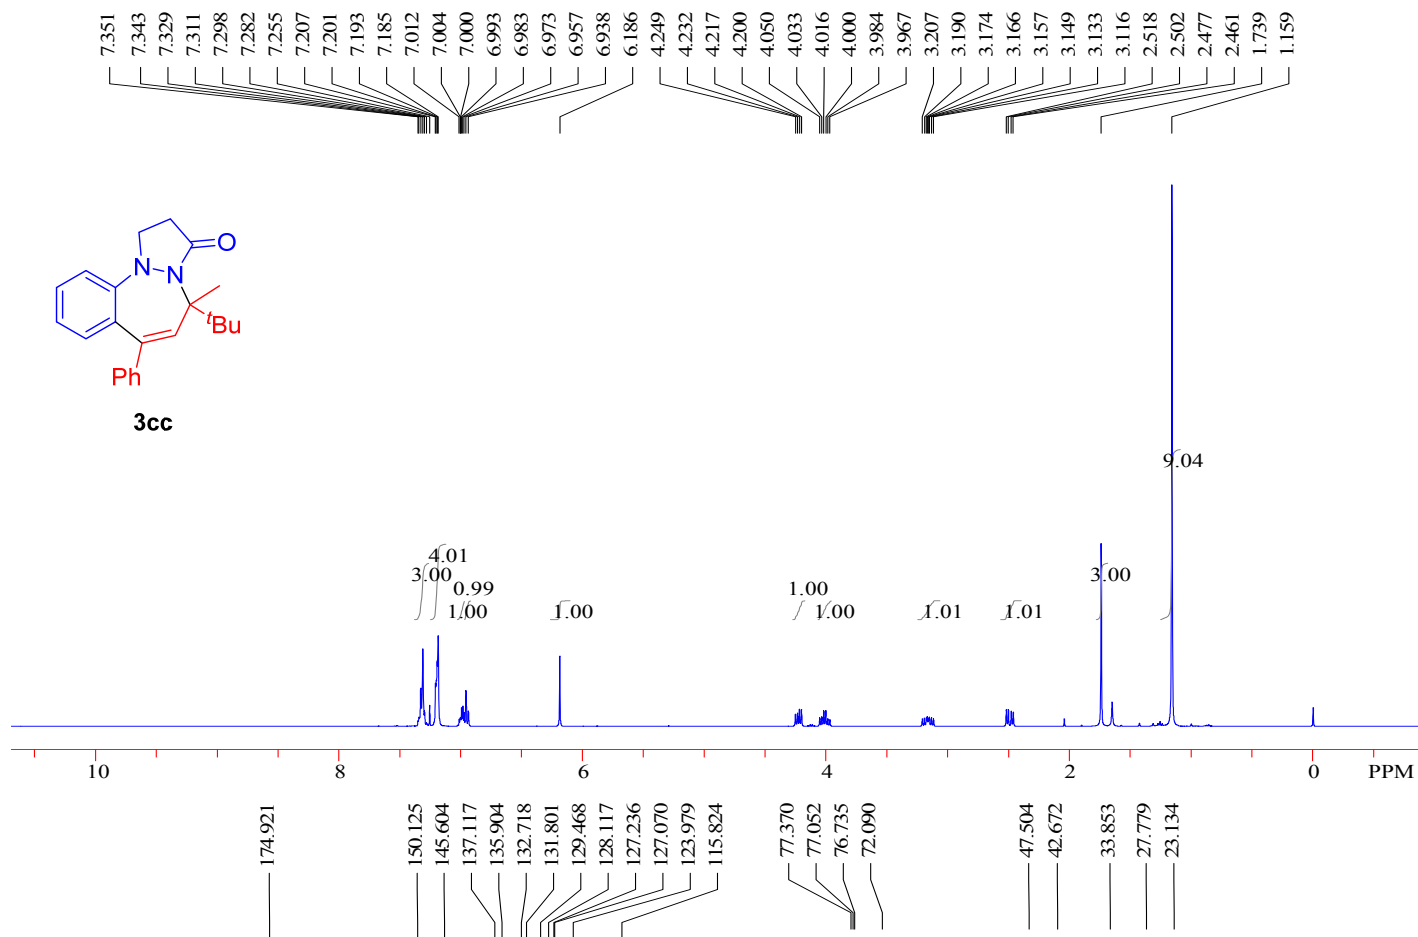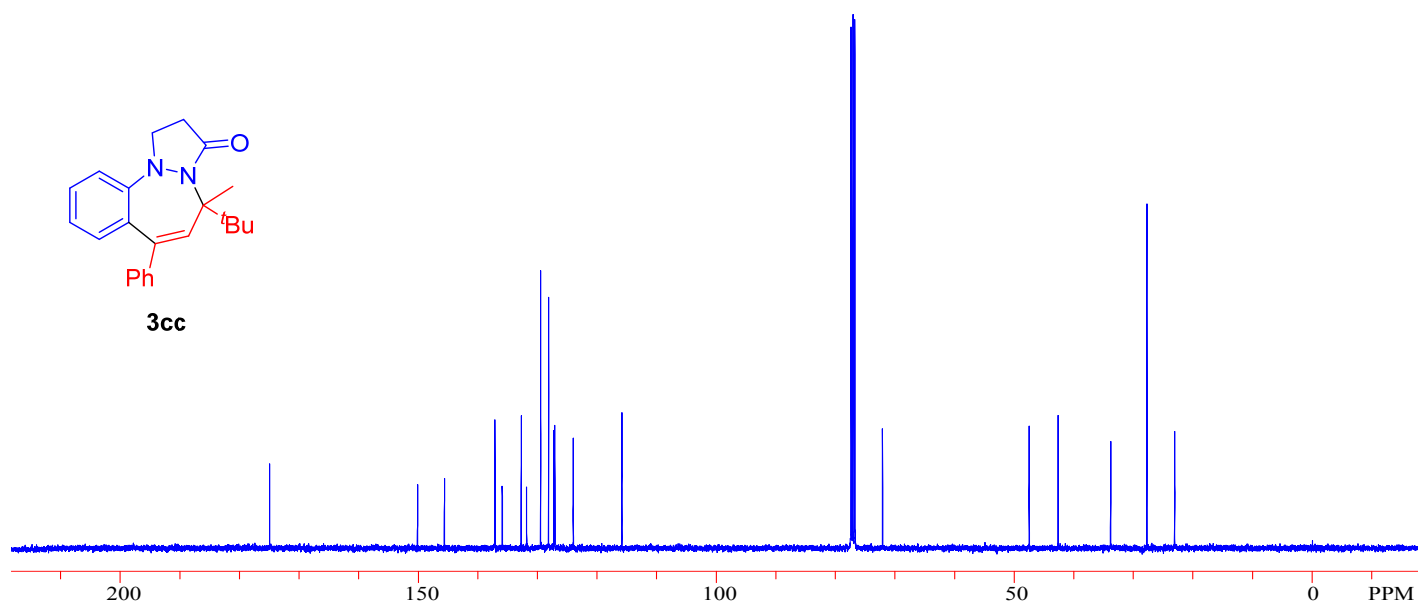

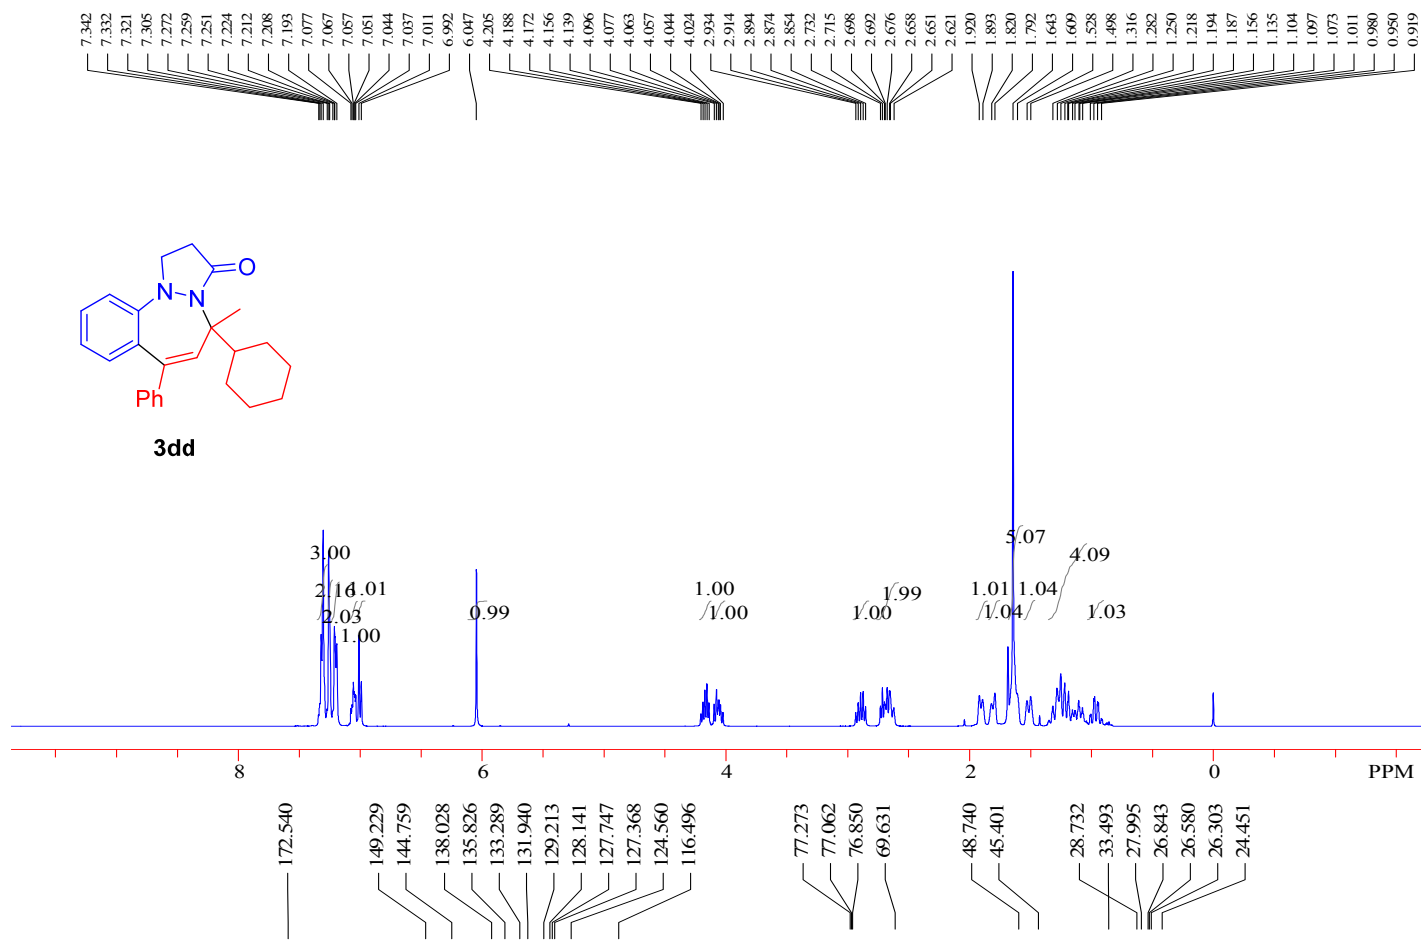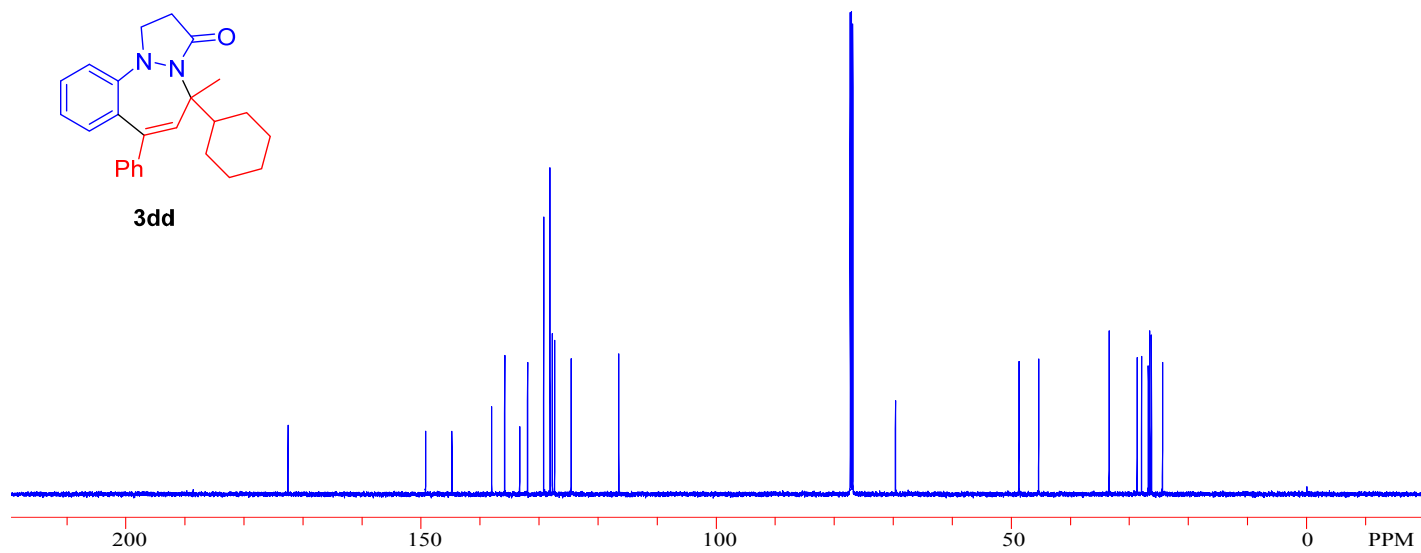

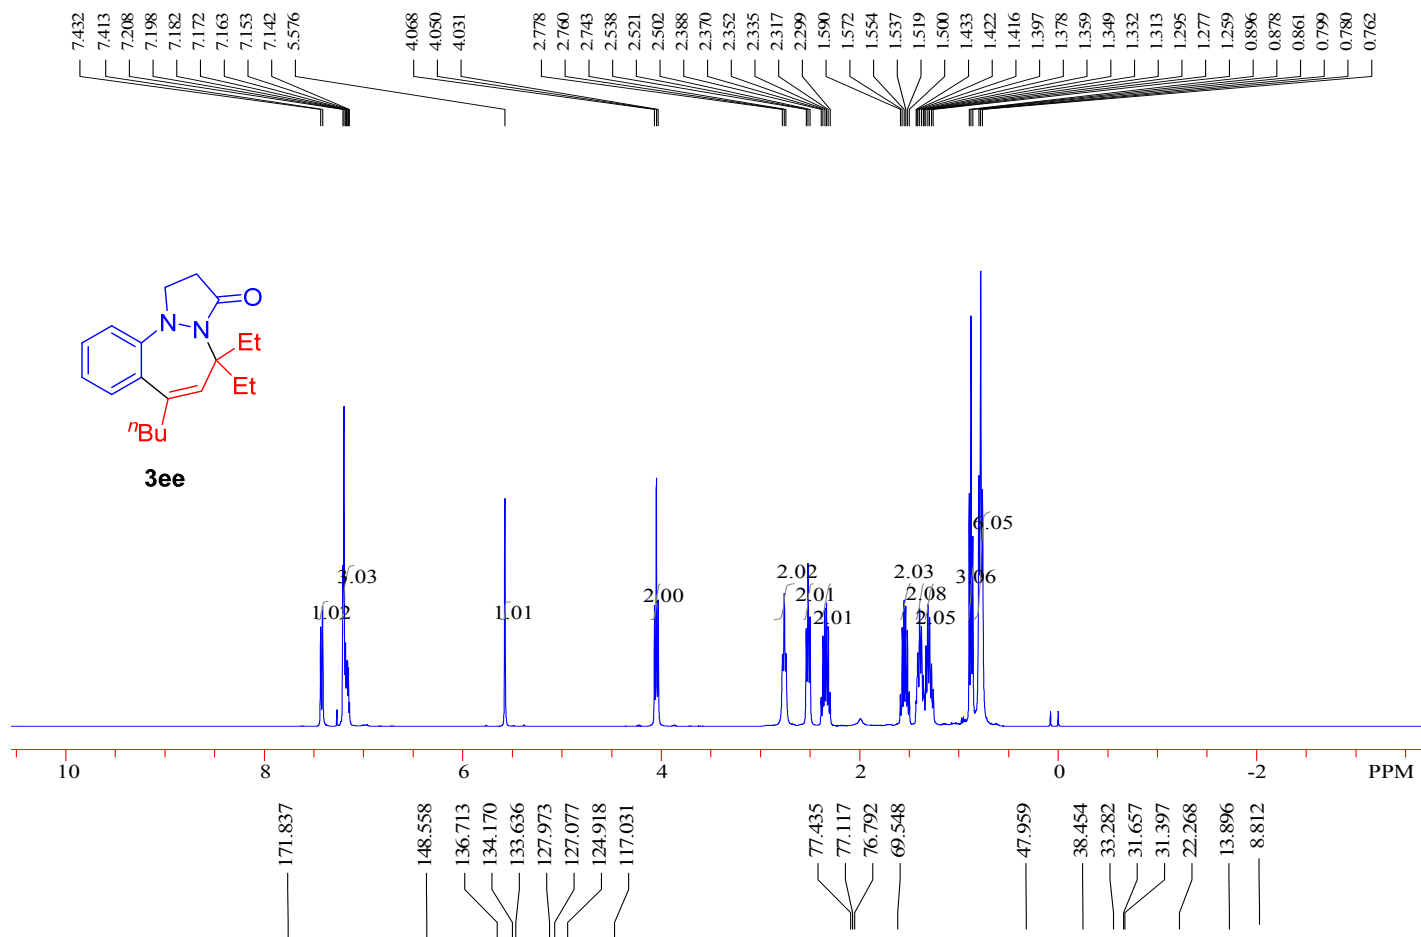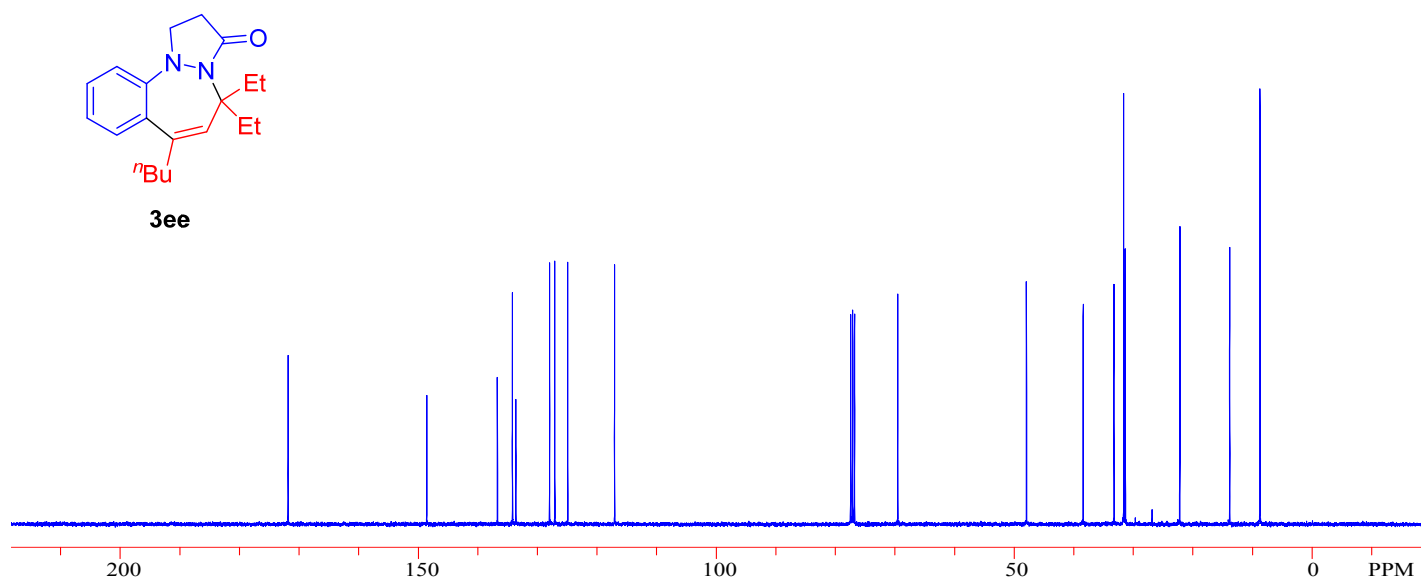

## V. Copies of NMR spectra of 5a-5m

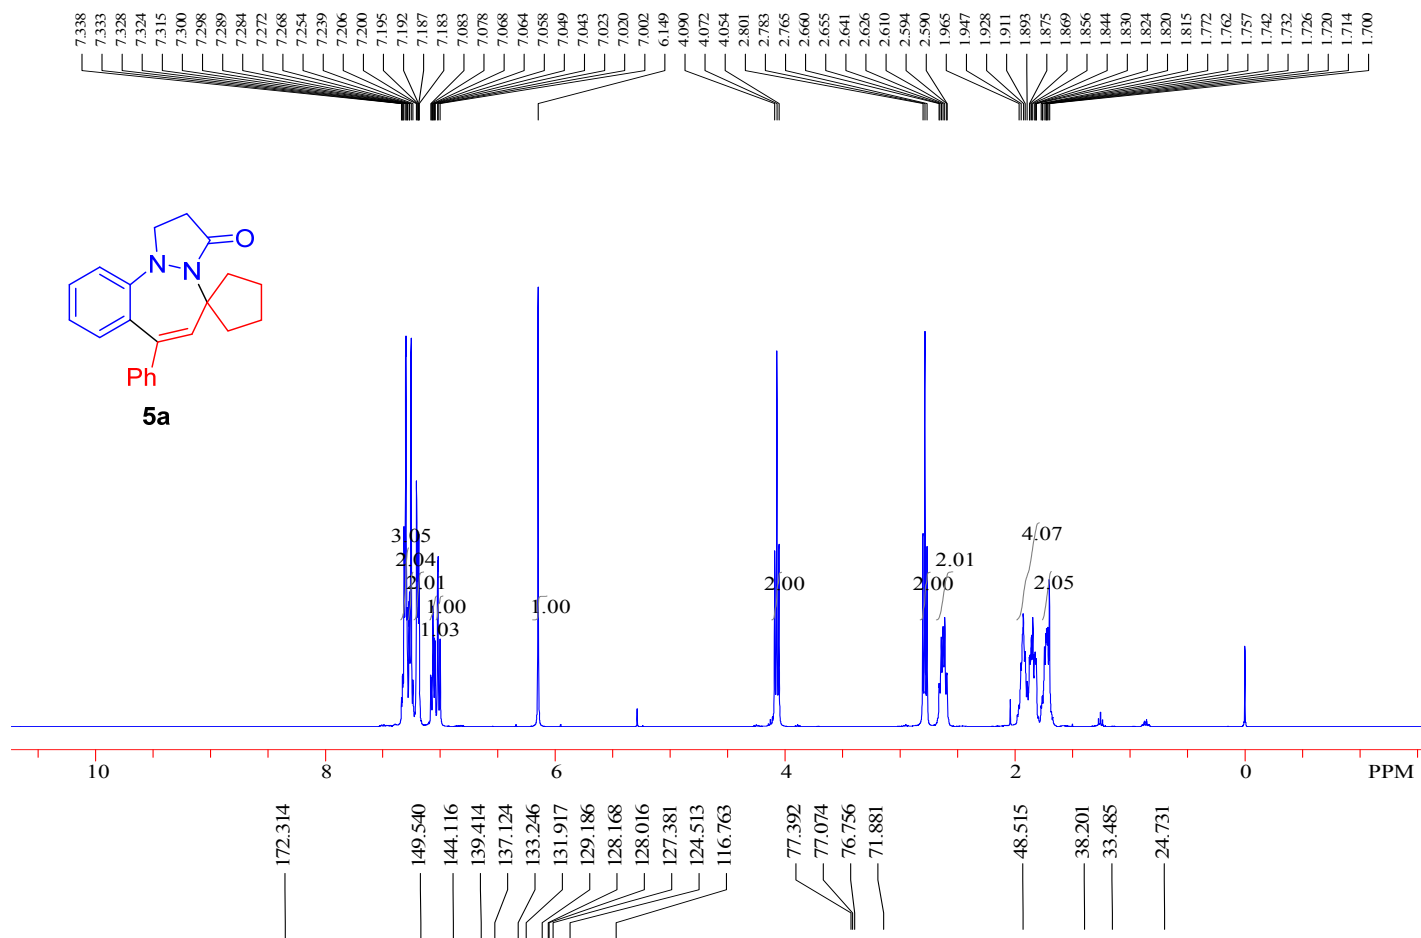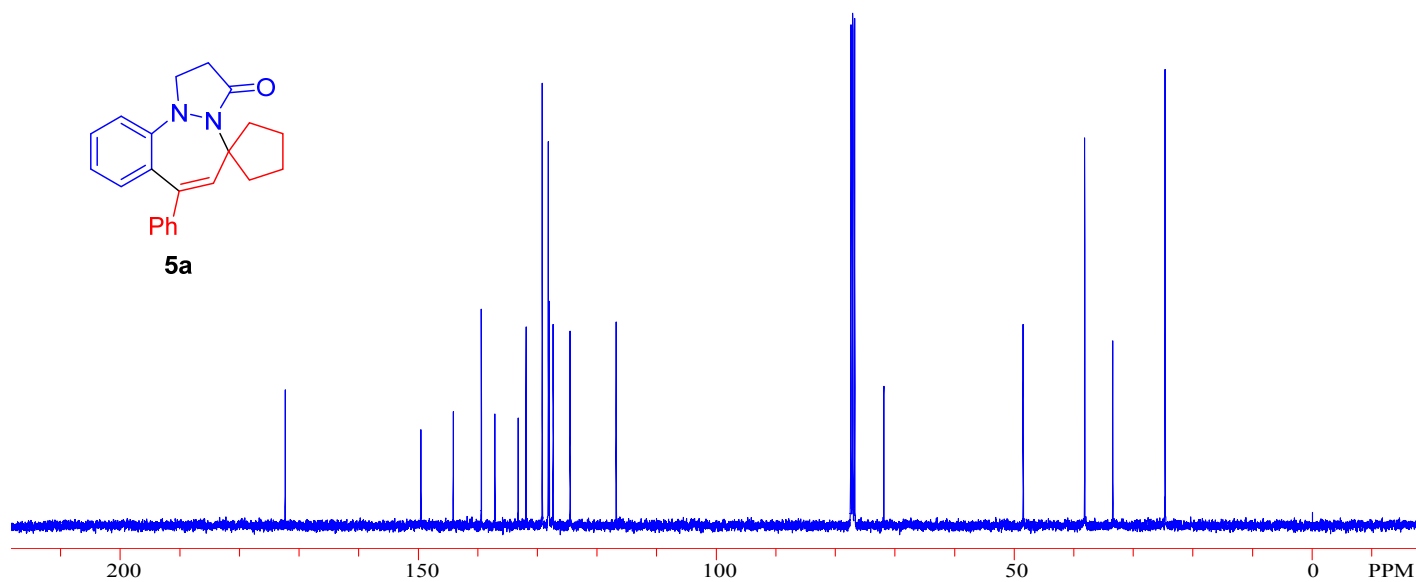

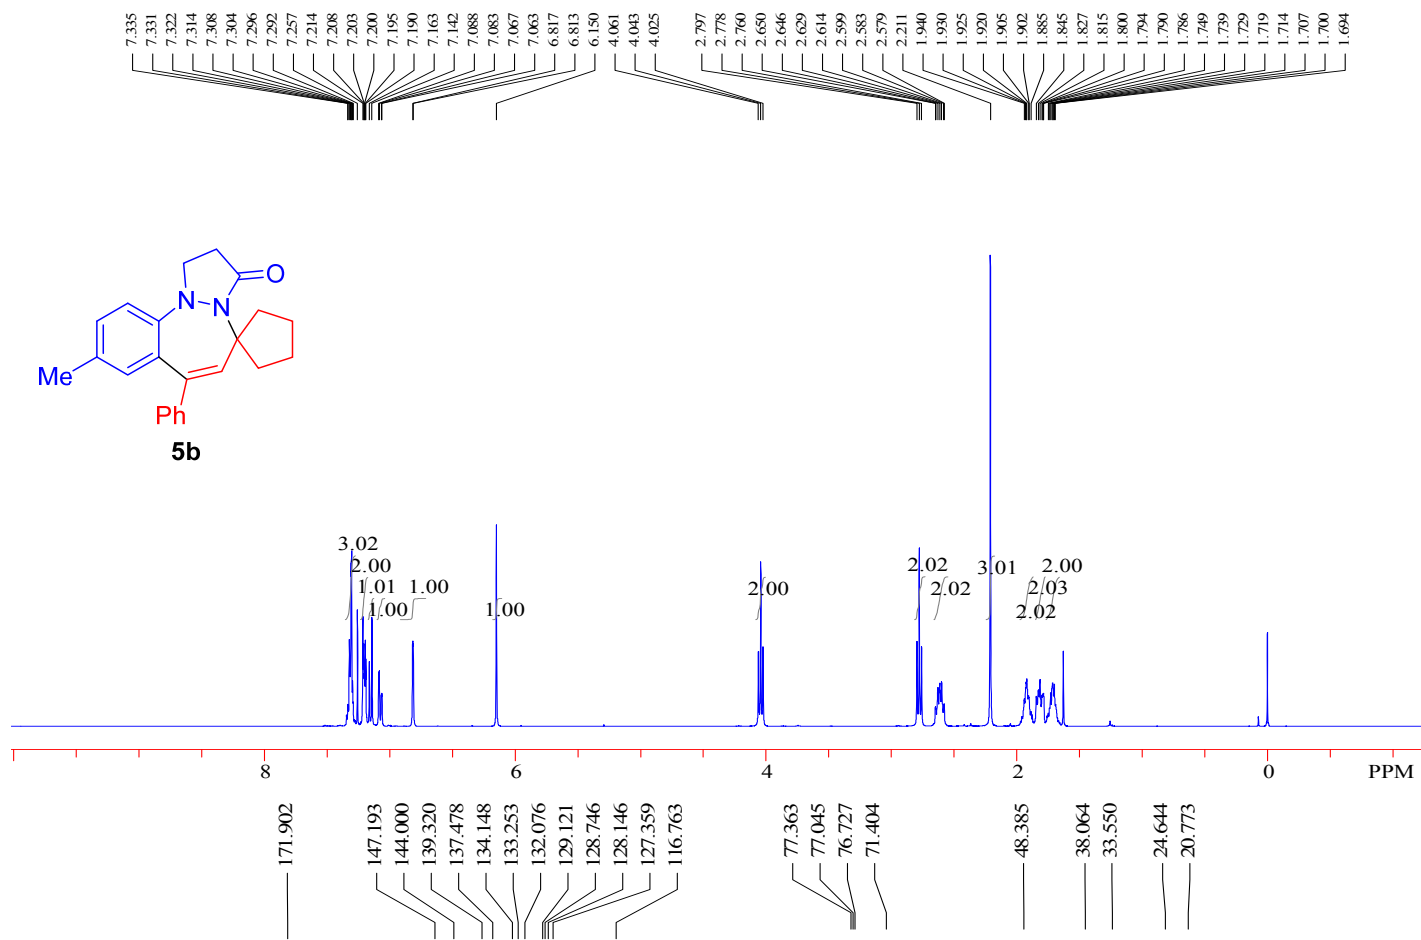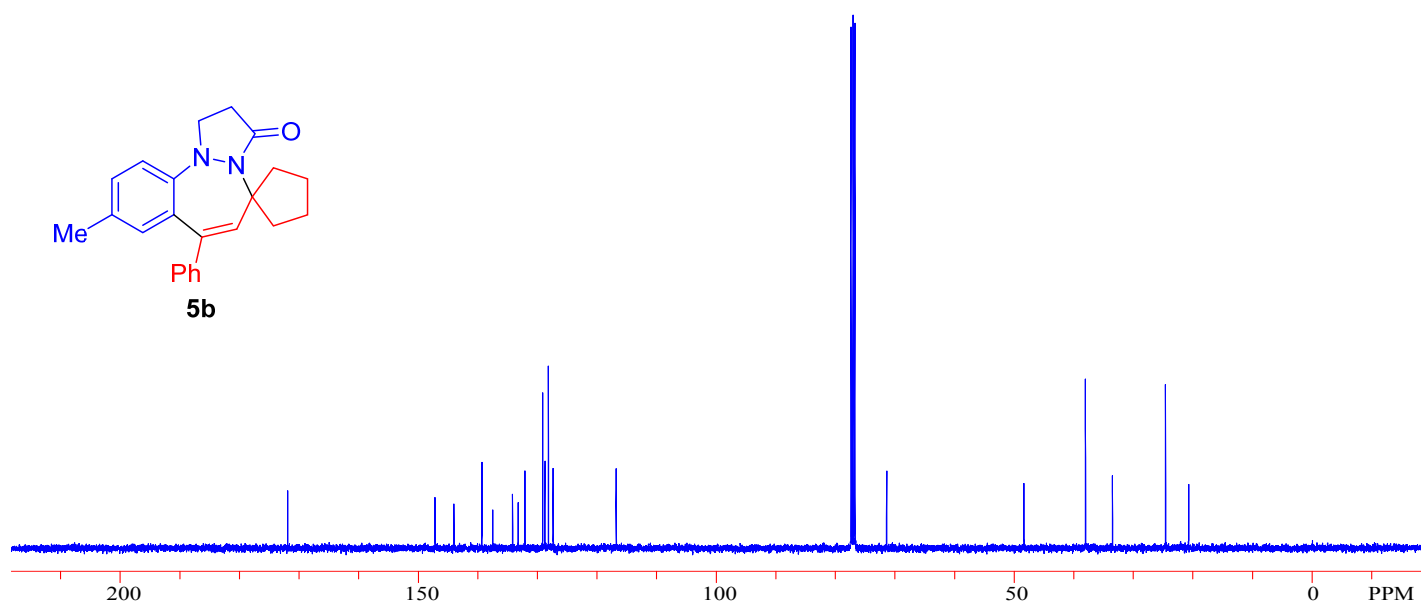



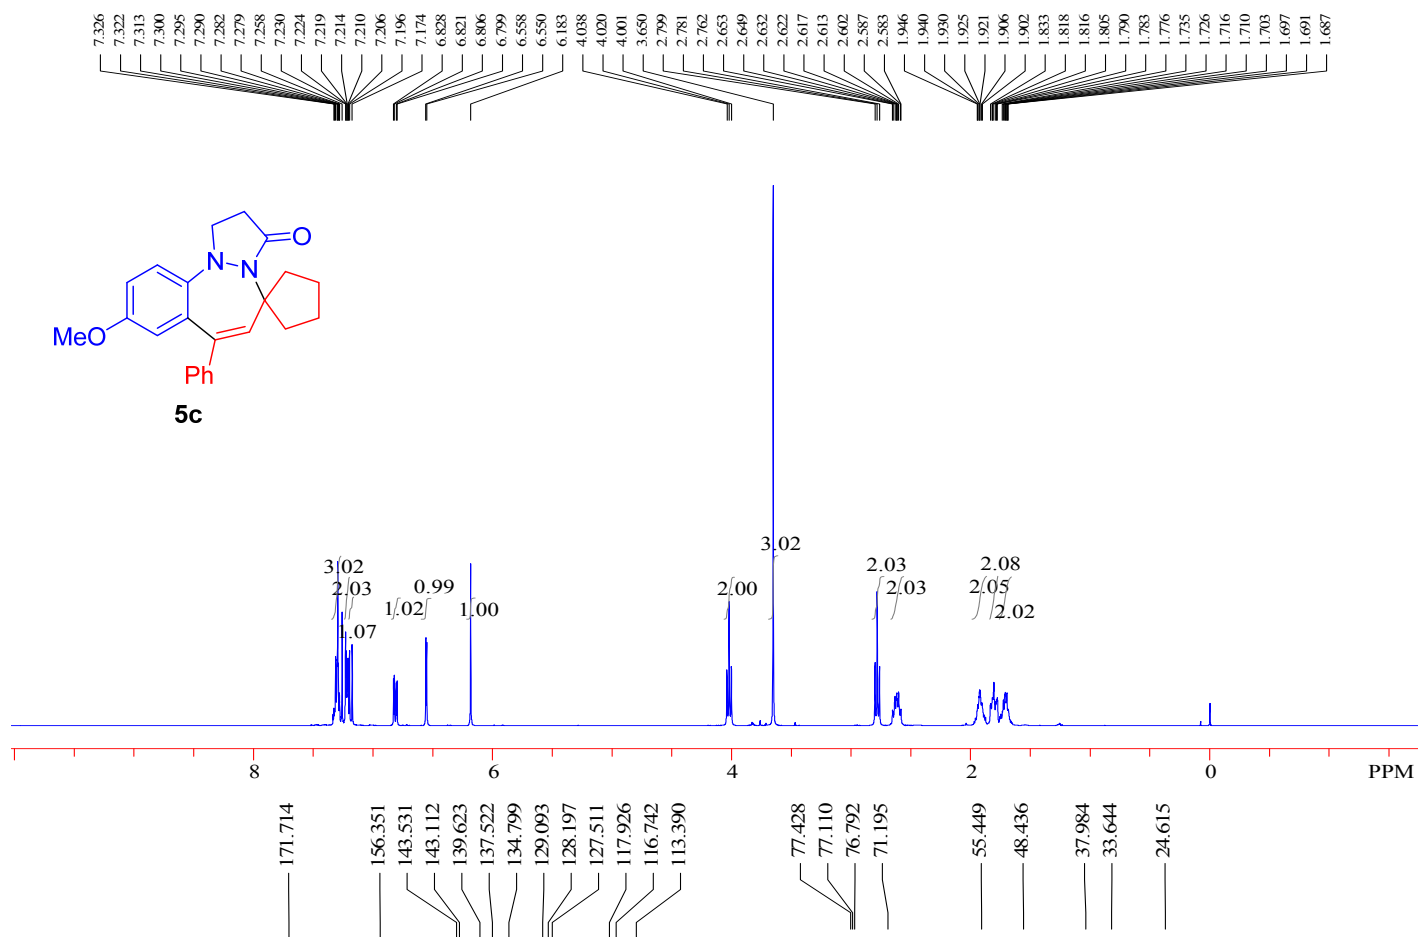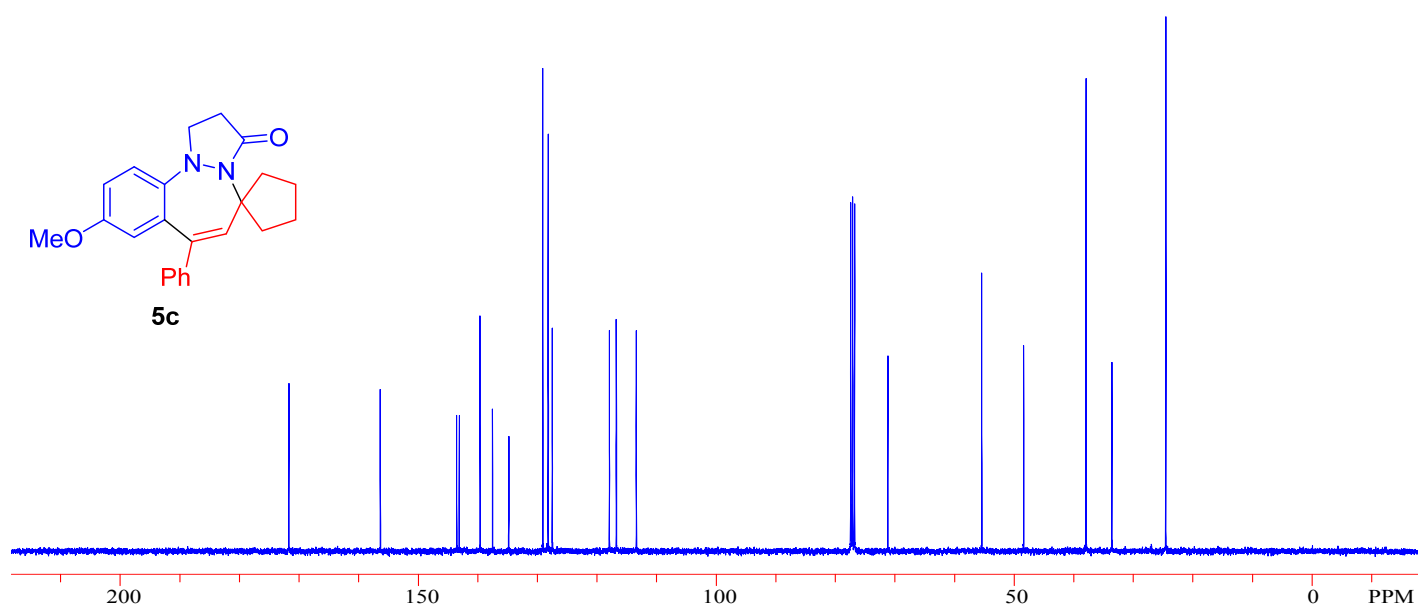

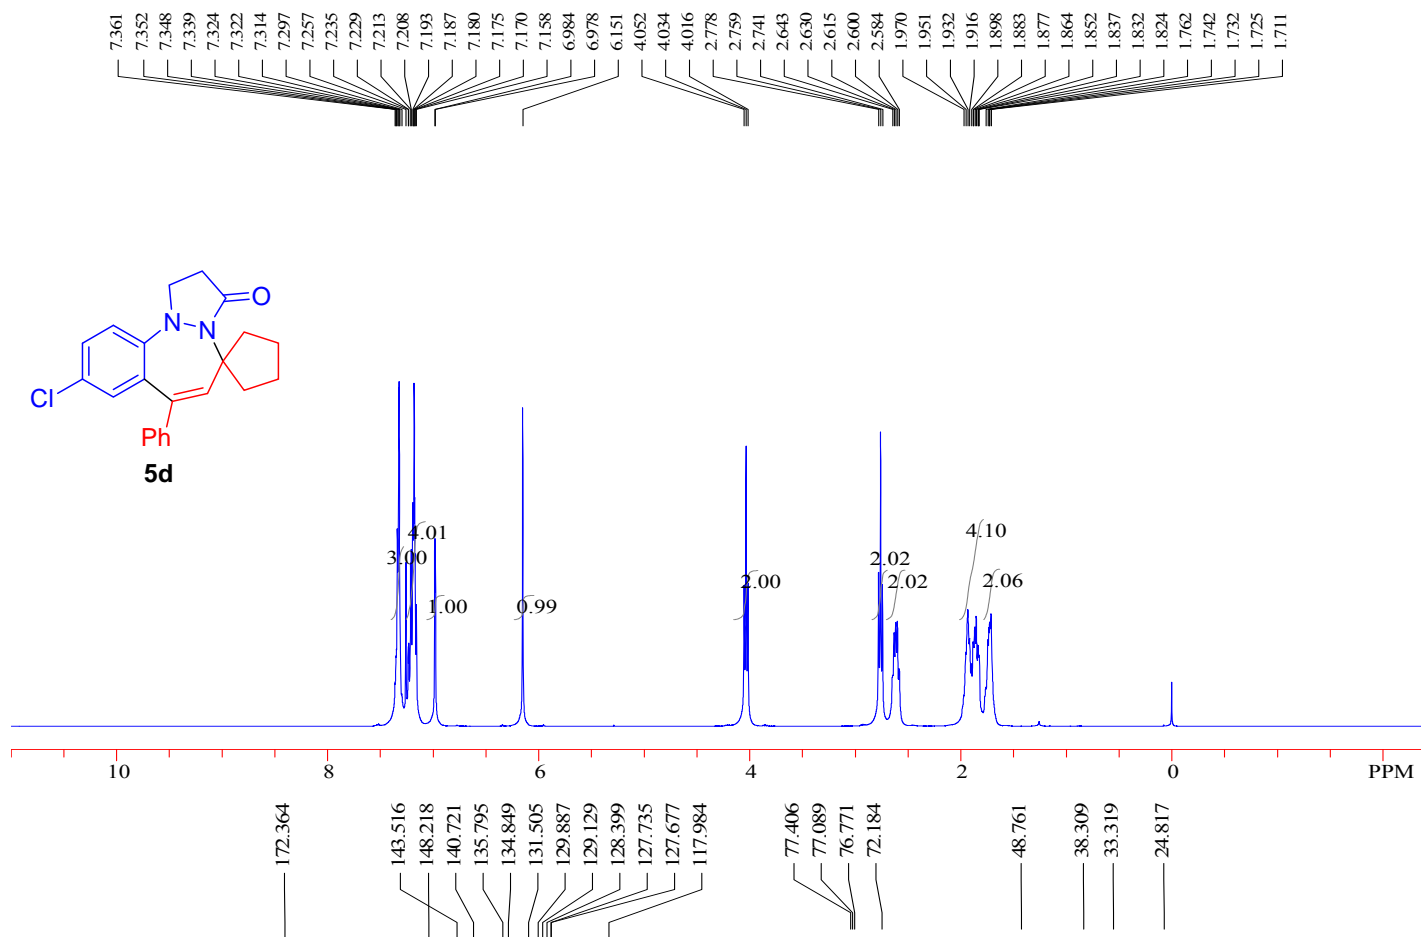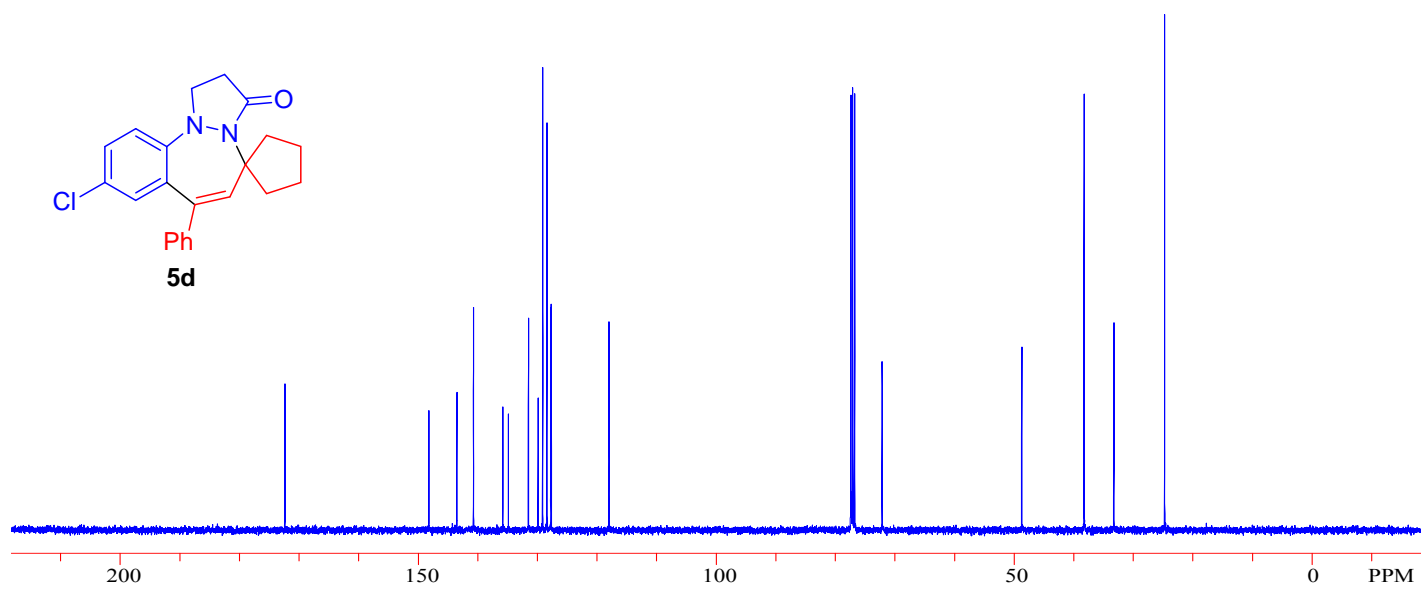

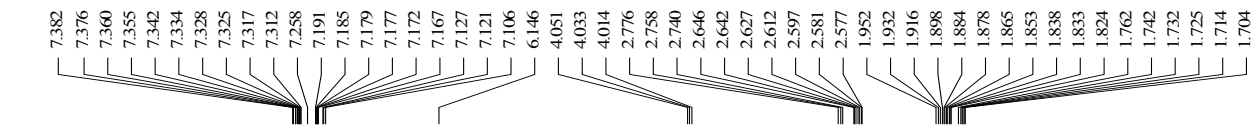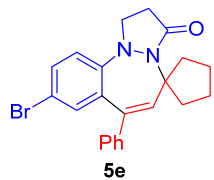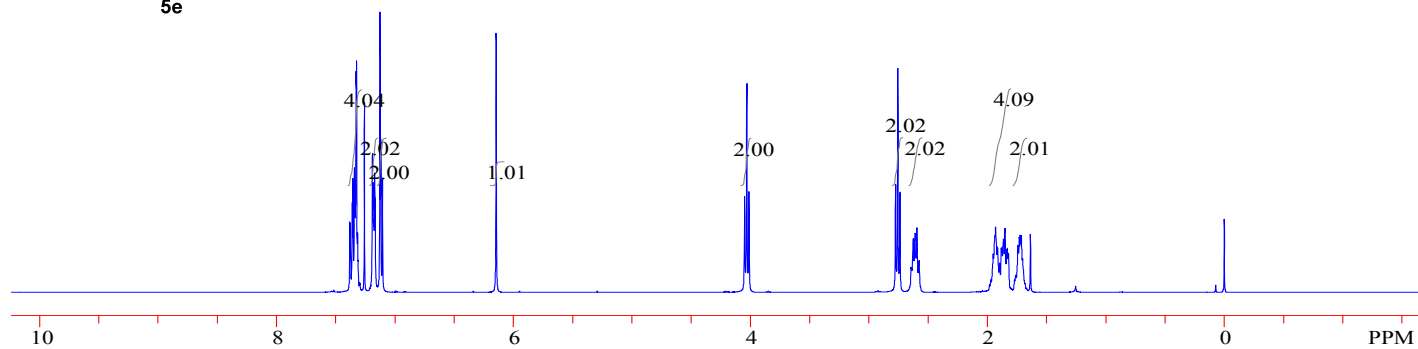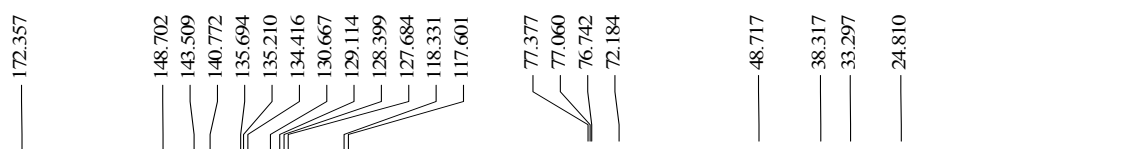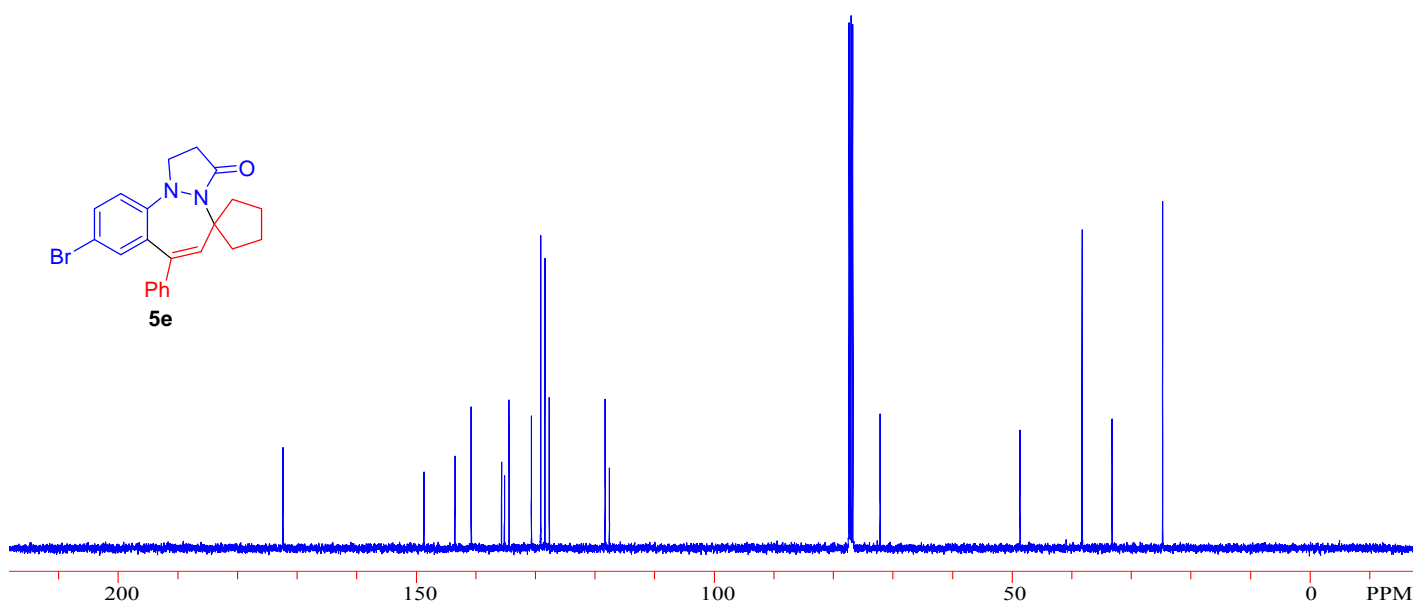

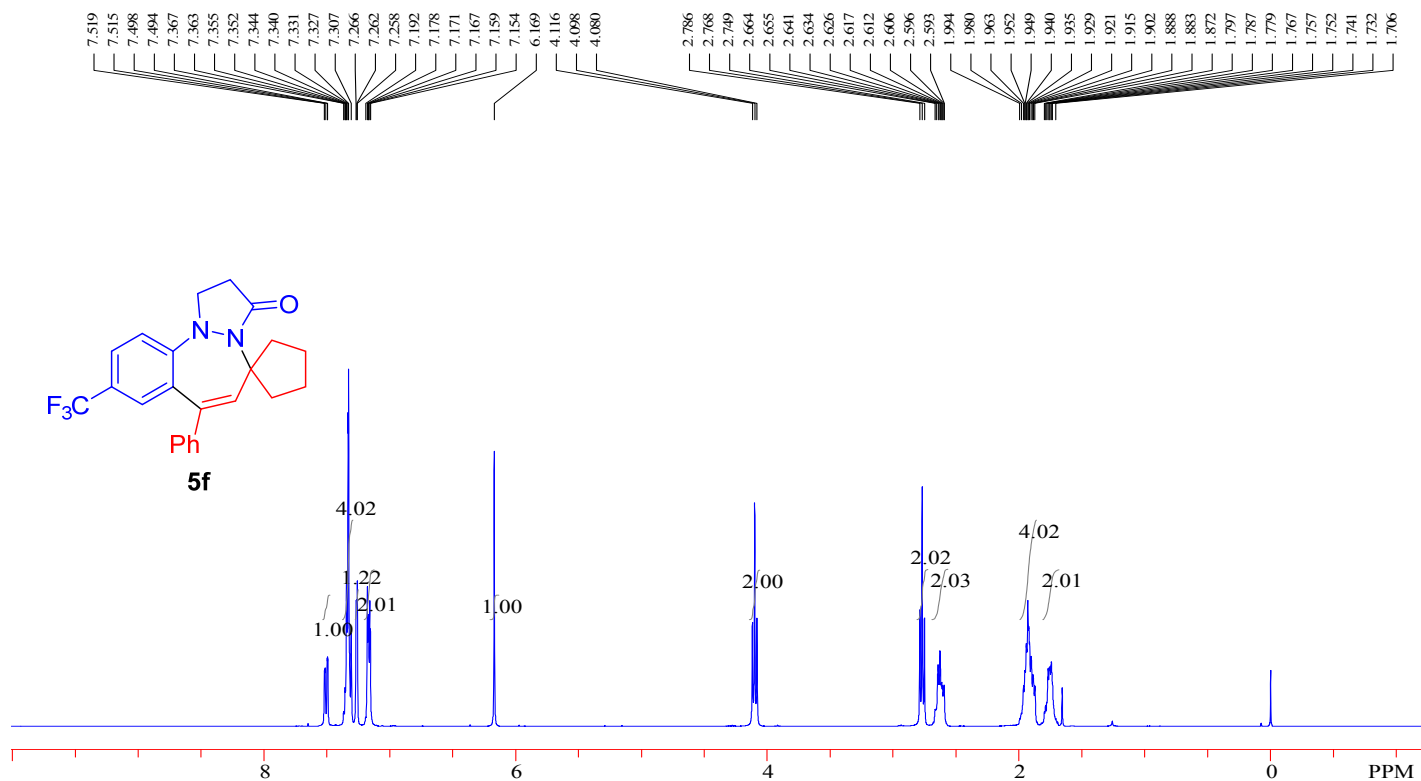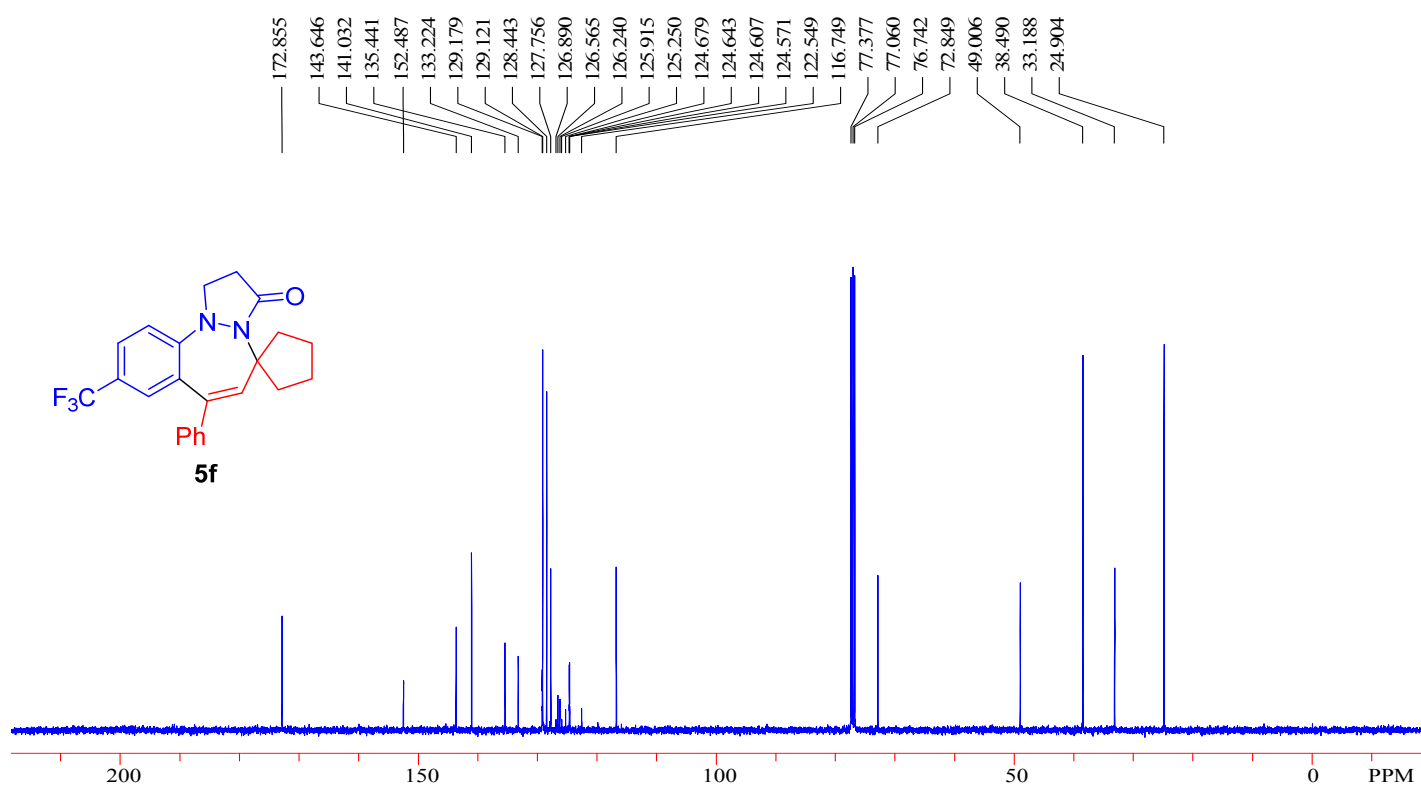

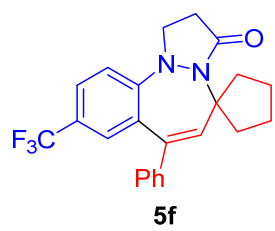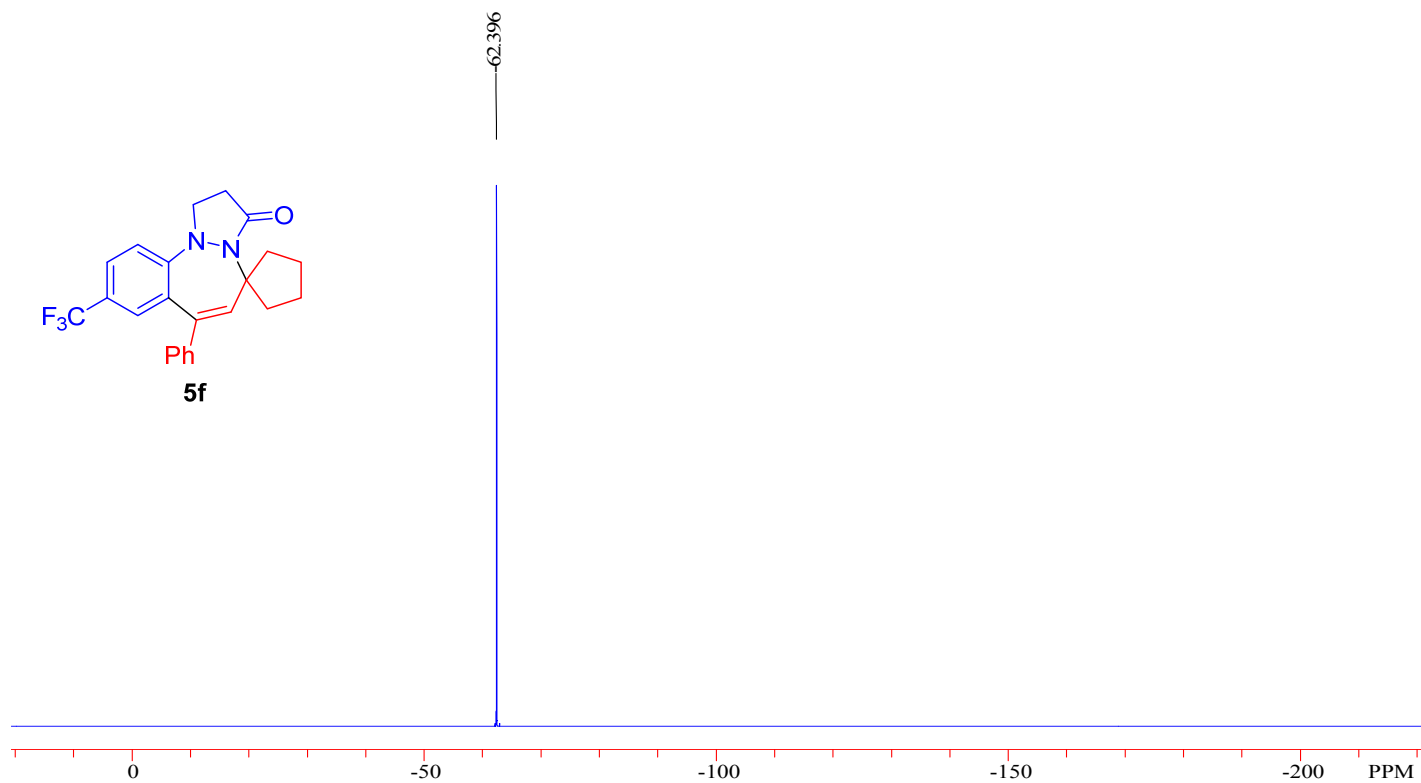

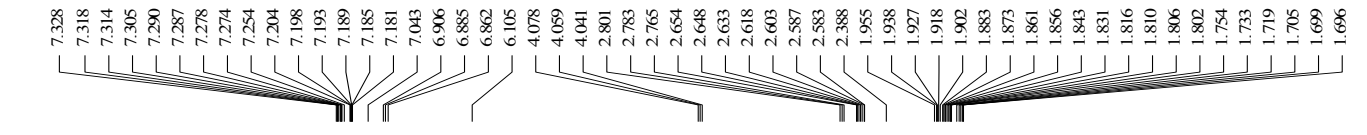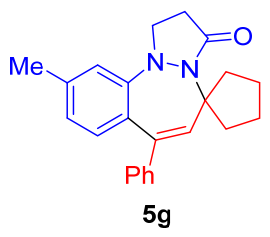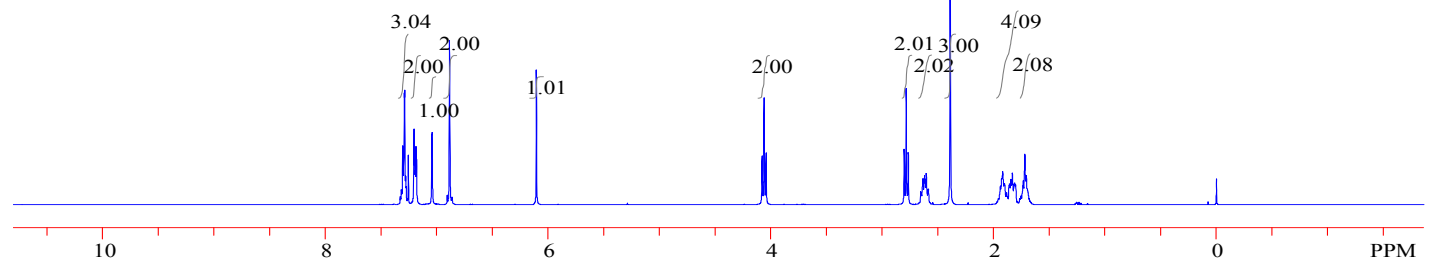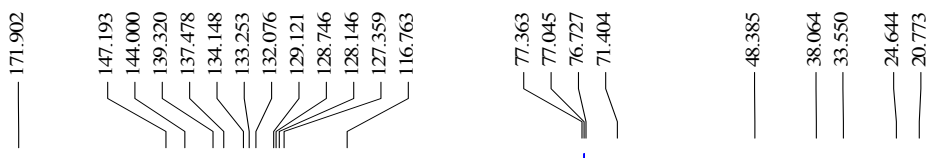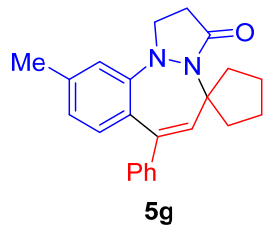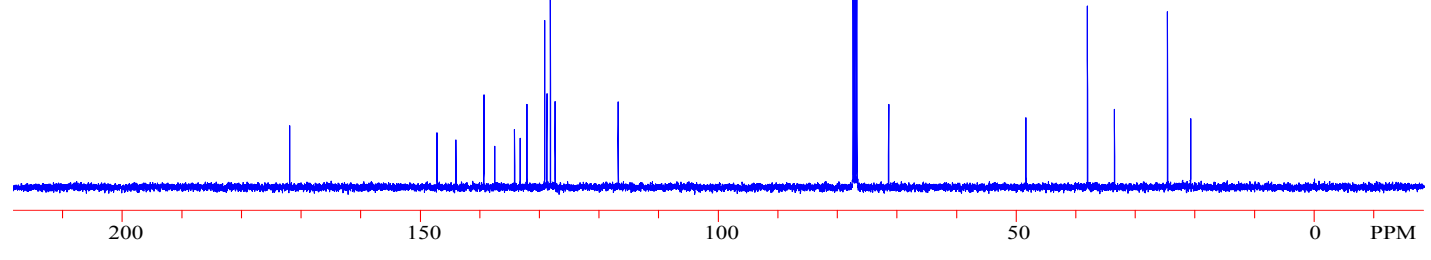

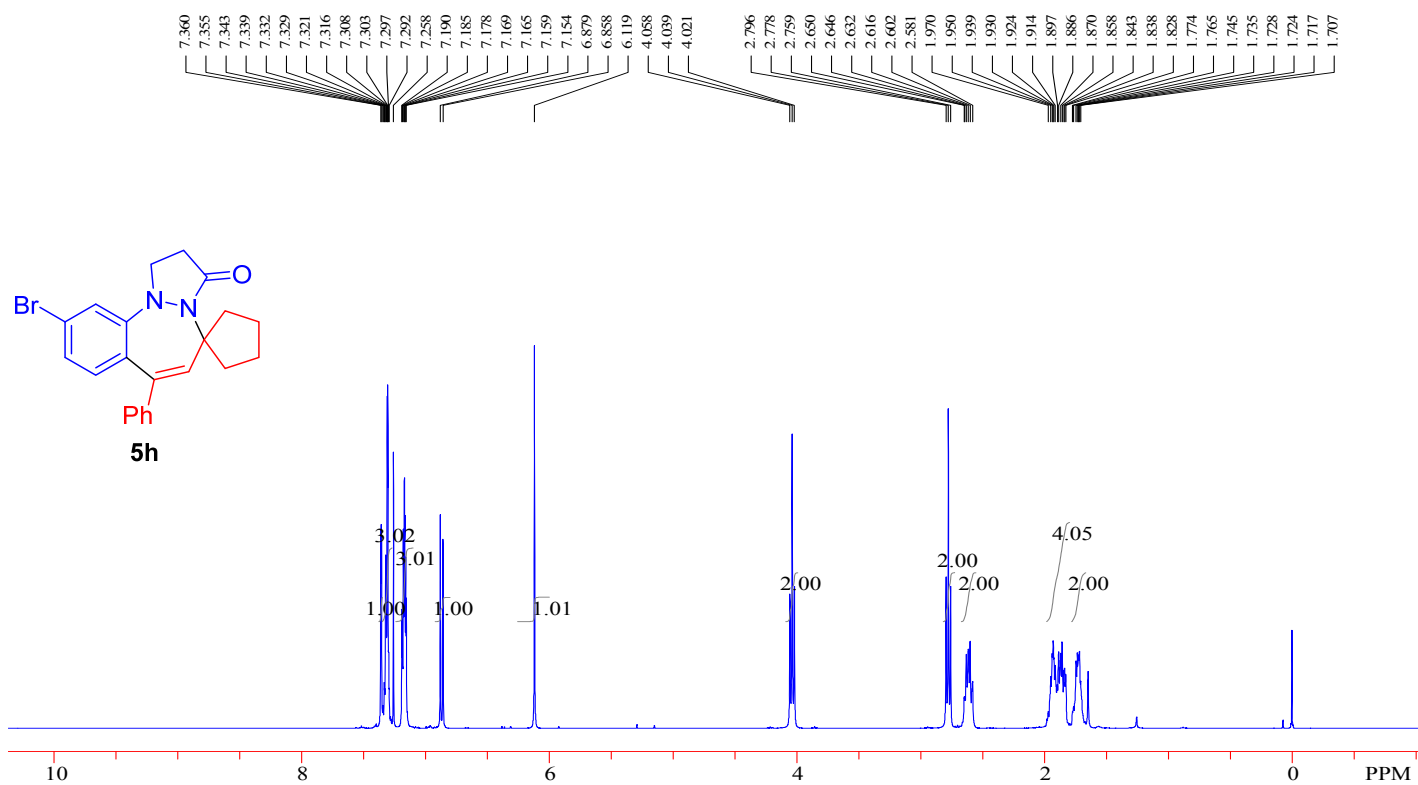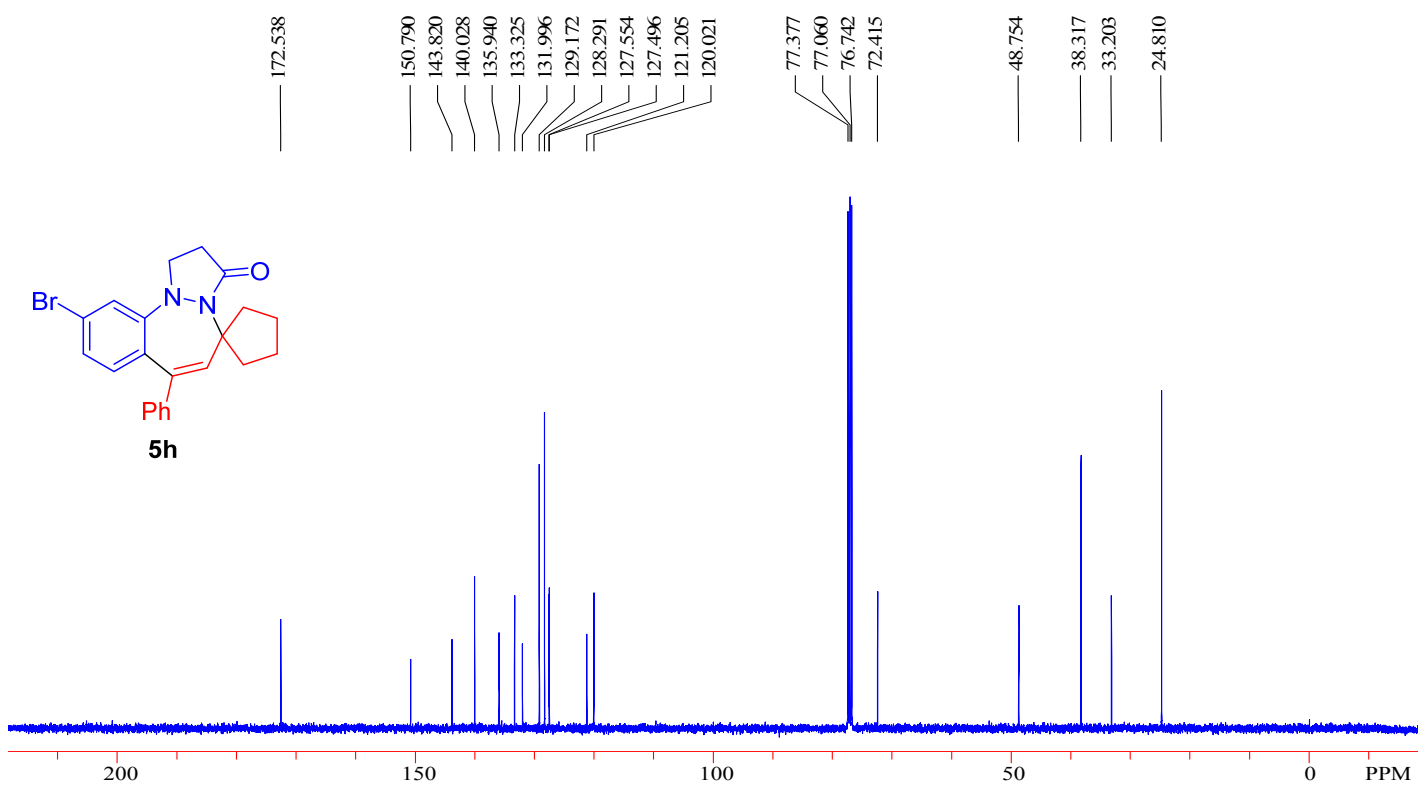

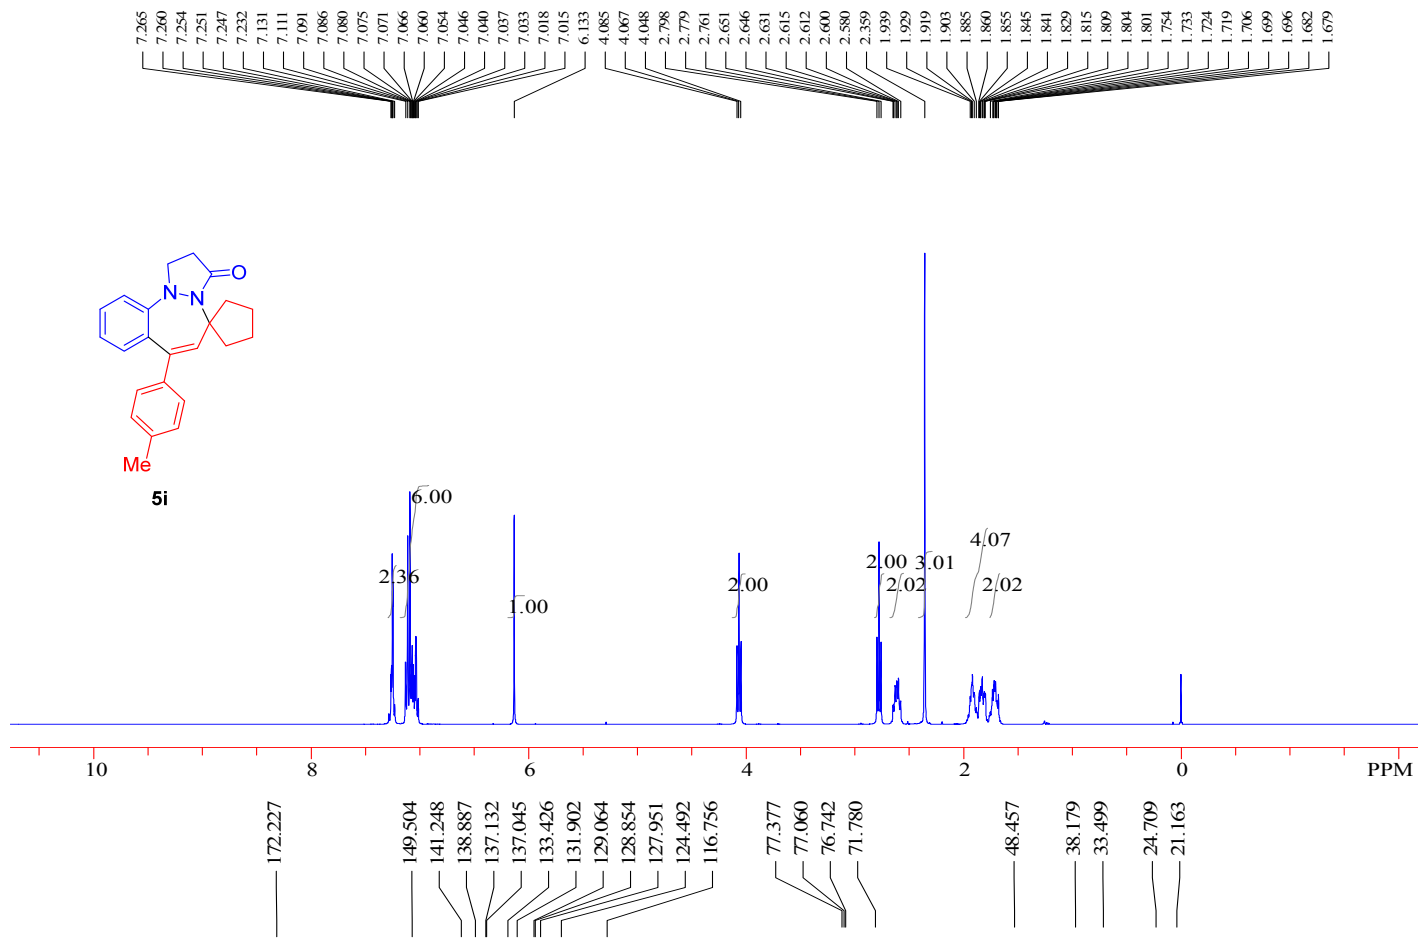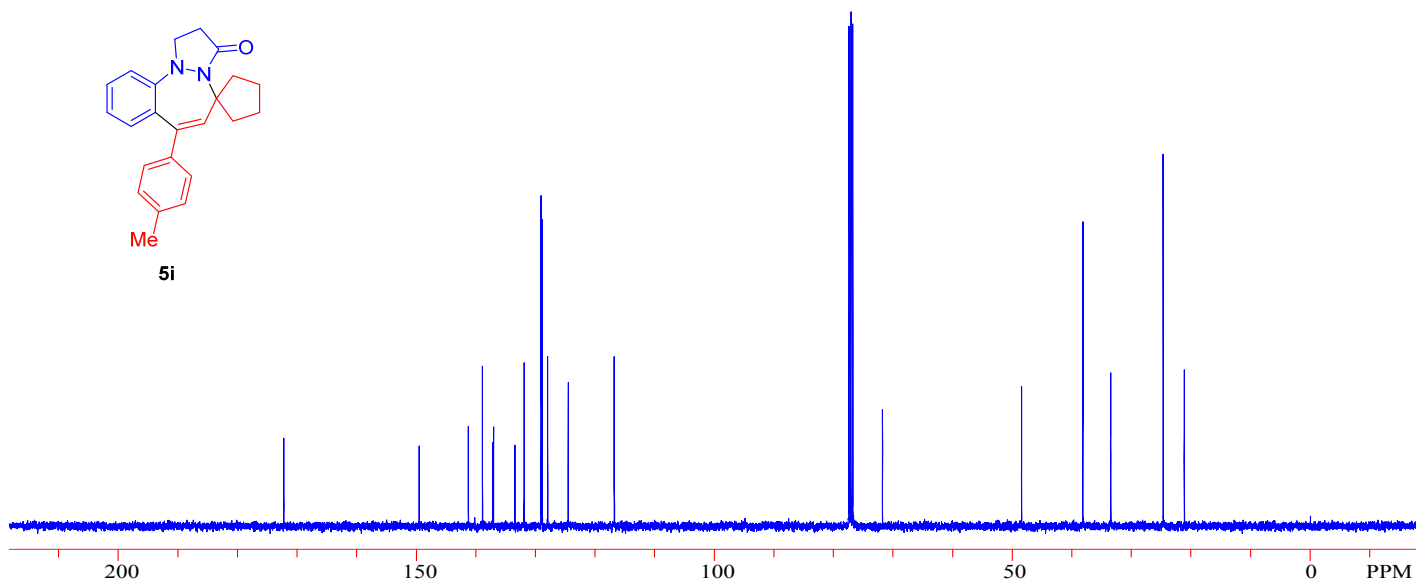



7.293  
7.289  
7.275  
7.268  
7.259  
7.255  
7.239  
7.135  
7.128  
7.124  
7.107  
7.098  
7.093  
7.078  
7.072  
7.064  
7.054  
7.049  
7.033  
6.863  
6.856  
6.835  
6.828  
6.135  
4.085  
4.066  
4.048  
3.818  
2.801  
2.783  
2.764  
2.647  
2.627  
2.612  
2.597  
2.581  
2.577  
1.955  
1.937  
1.921  
1.917  
1.902  
1.882  
1.873  
1.843  
1.827  
1.815  
1.799  
1.794  
1.786  
1.751  
1.739  
1.730  
1.715  
1.702  
1.692

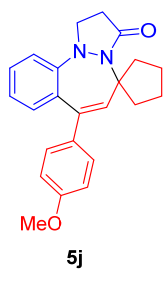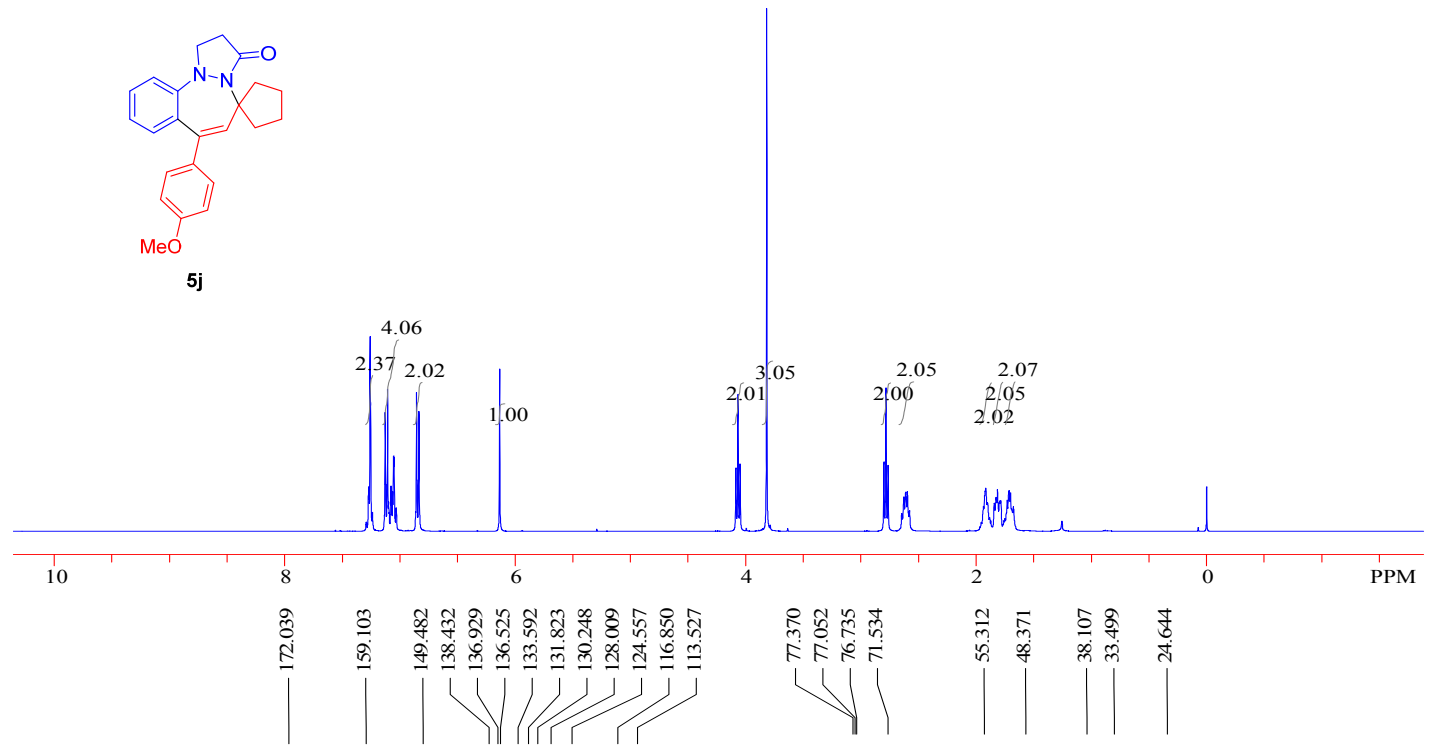

172.039  
159.103  
149.482  
138.432  
136.929  
136.525  
133.592  
131.823  
130.248  
128.009  
124.557  
116.850  
113.527  
77.370  
77.052  
76.735  
71.534  
55.312  
48.371  
38.107  
33.499  
24.644

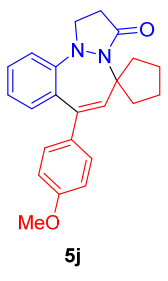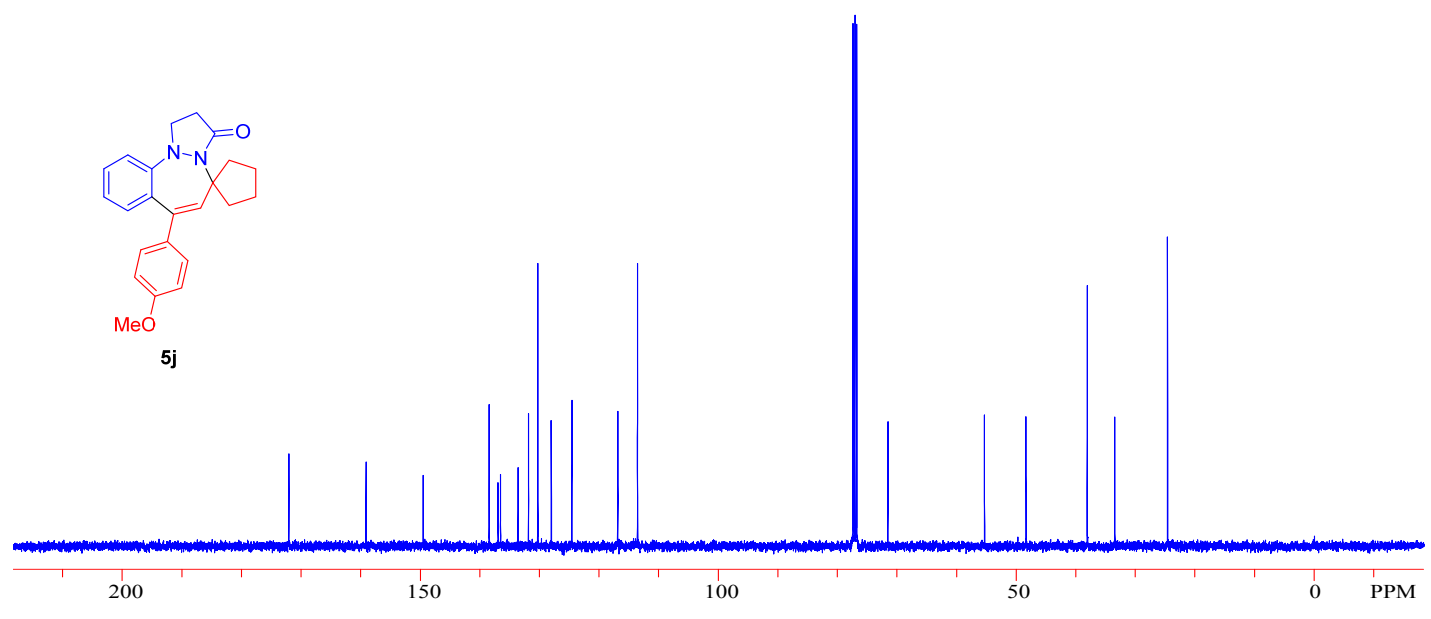

200  
150  
100  
50  
0 PPM

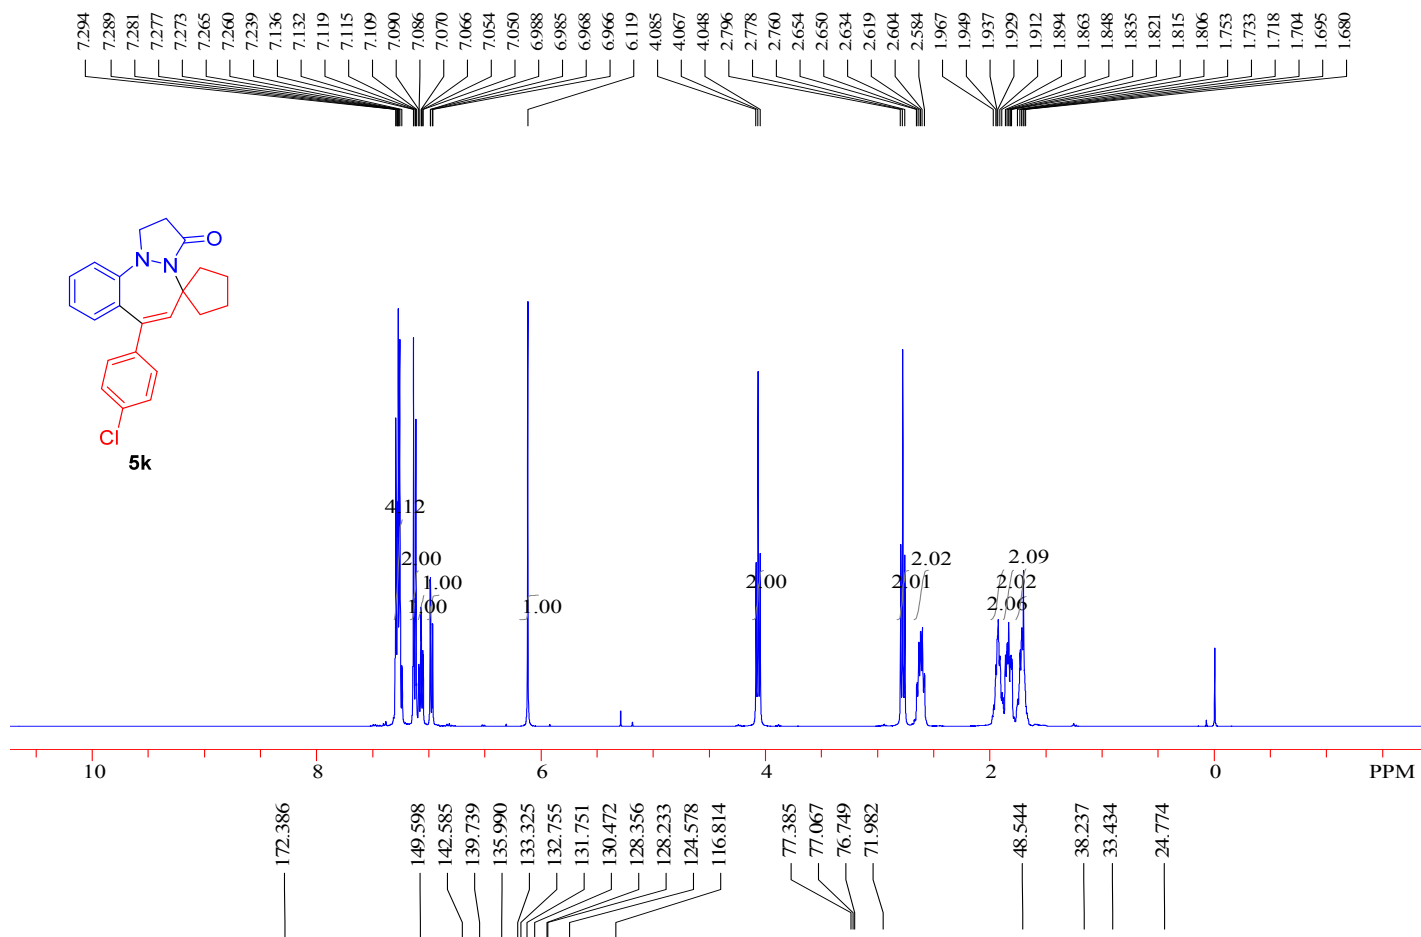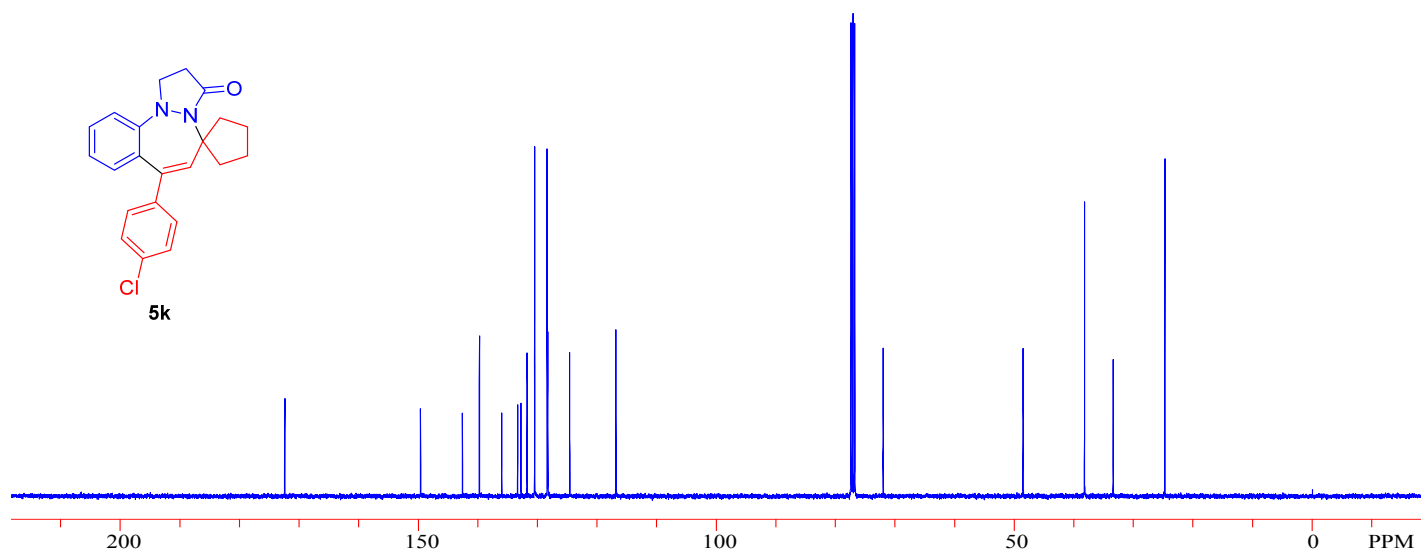

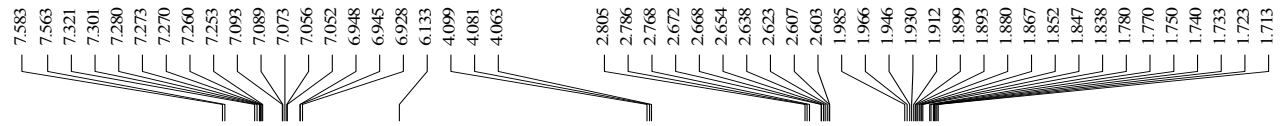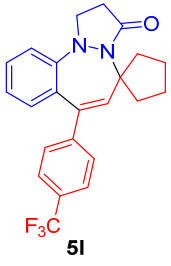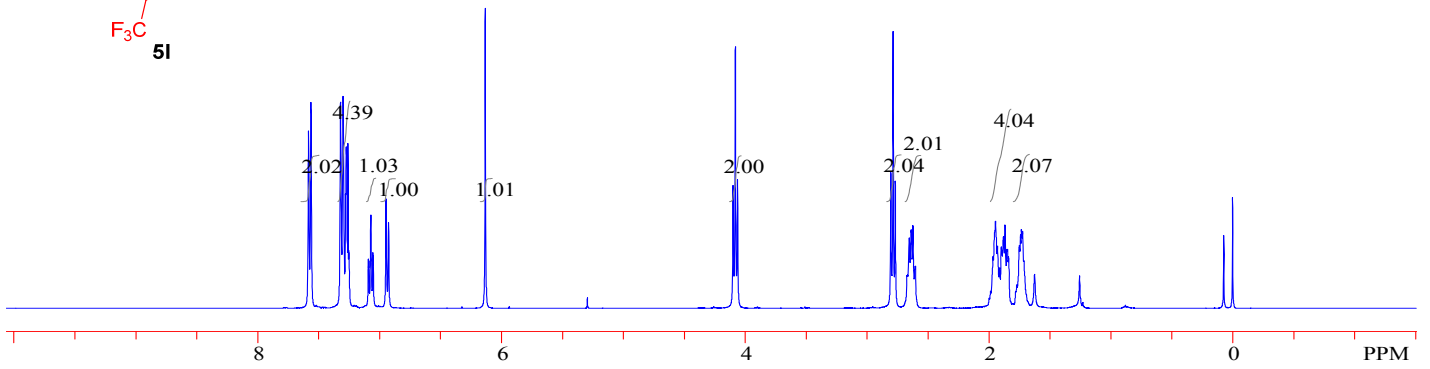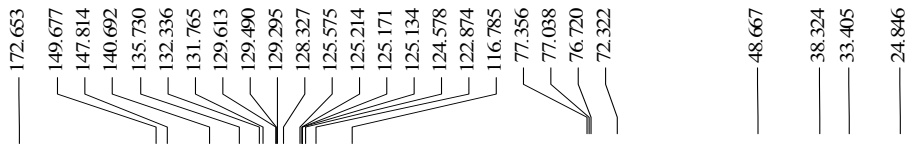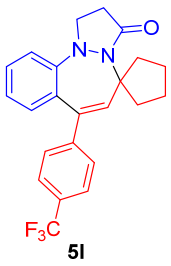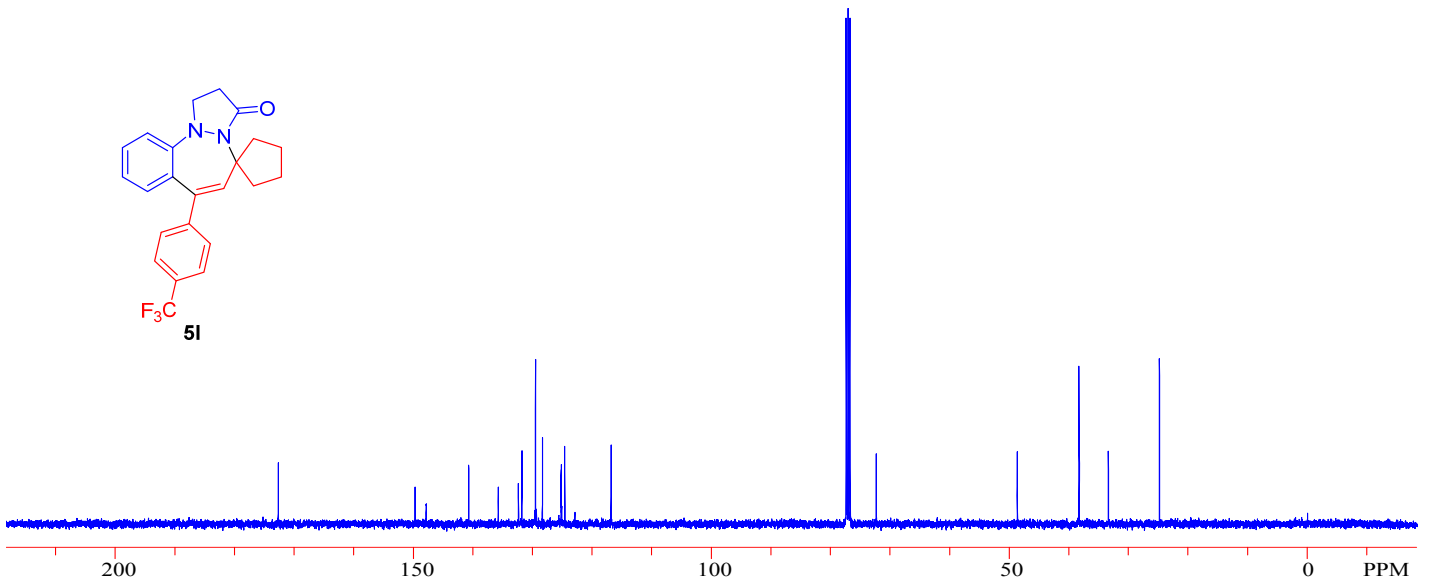

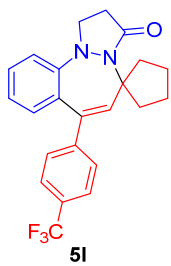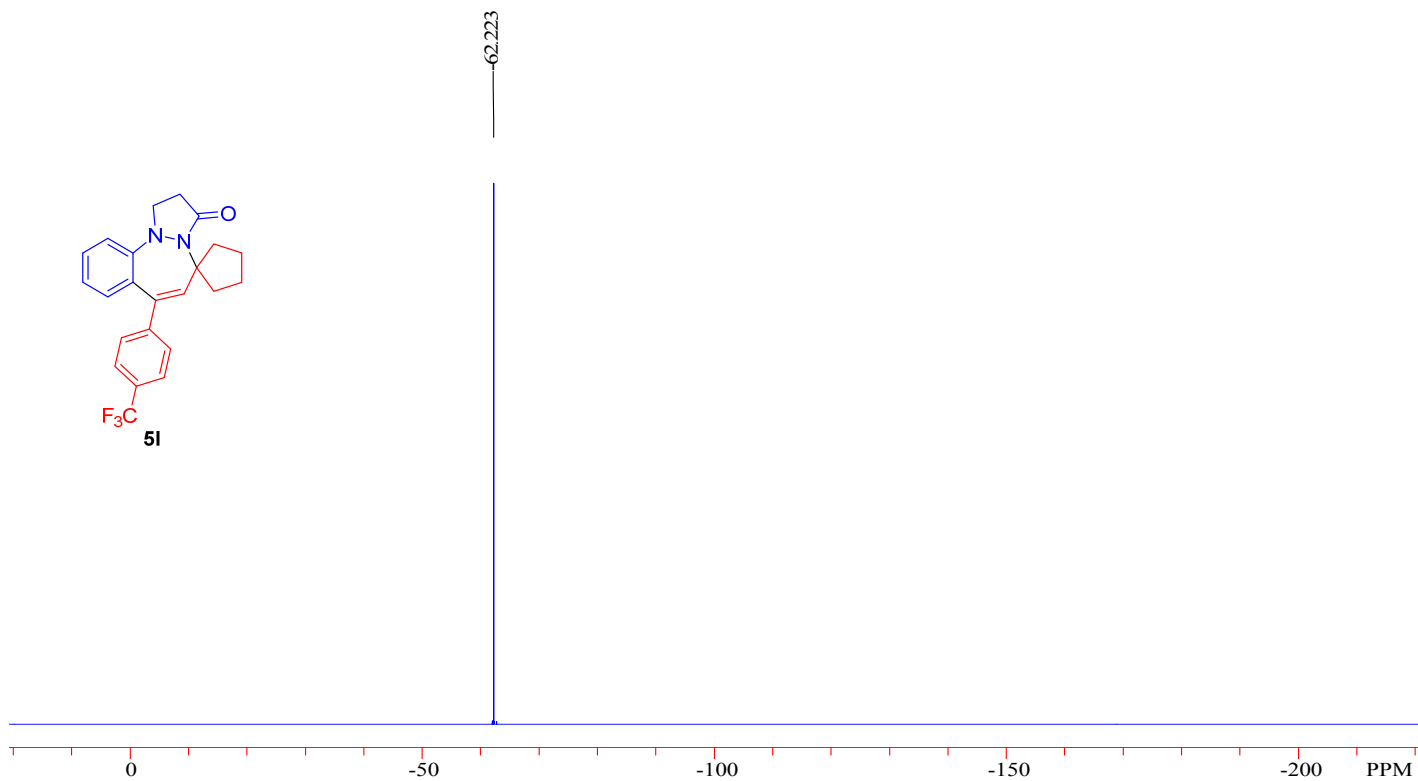

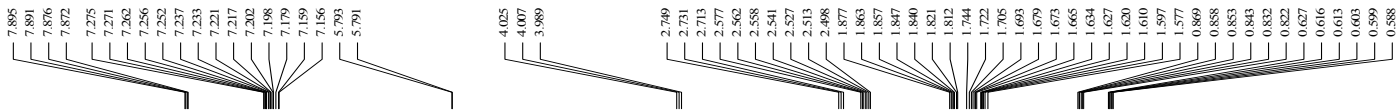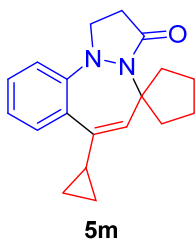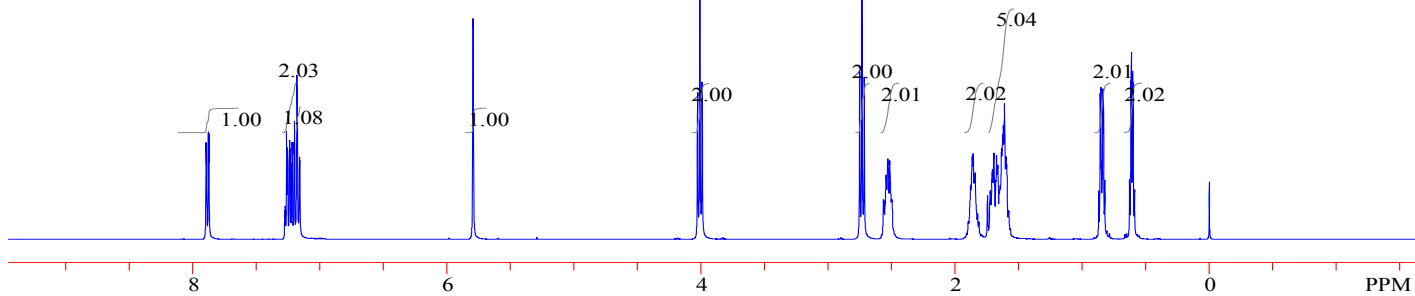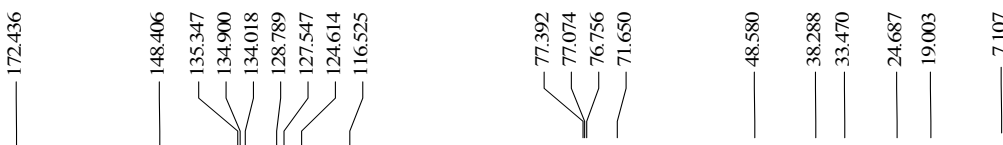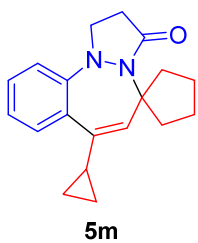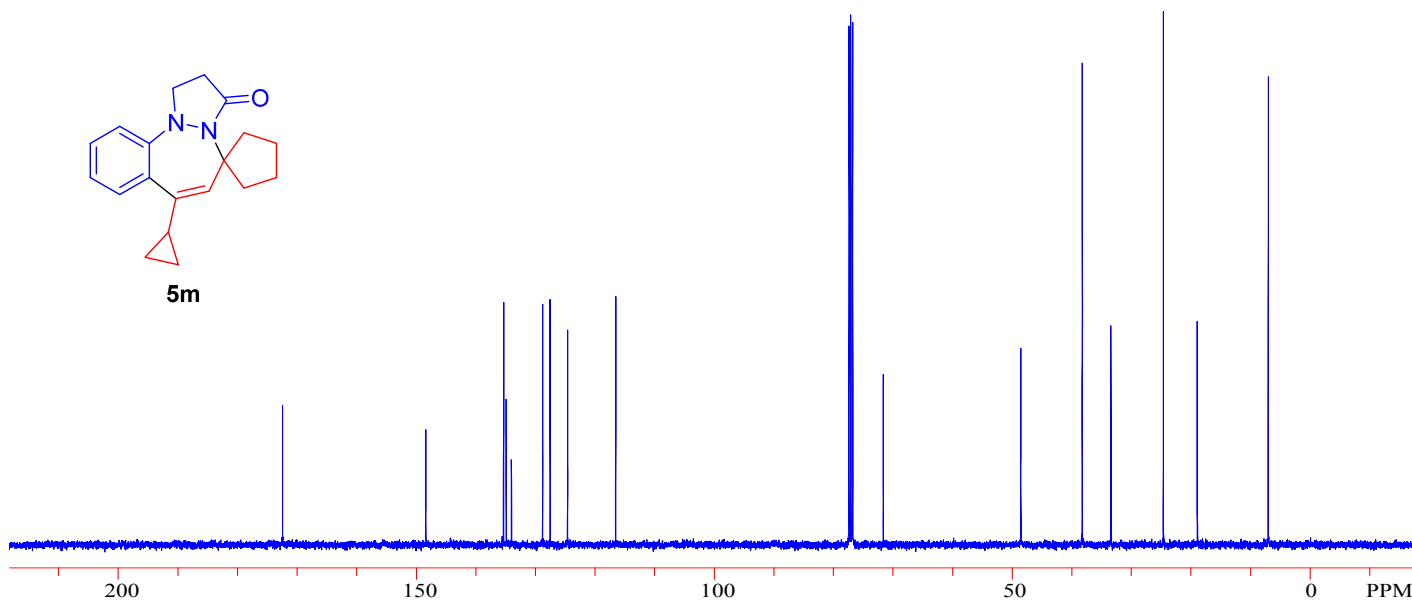

## V. Copies of NMR spectra of 7a-7q

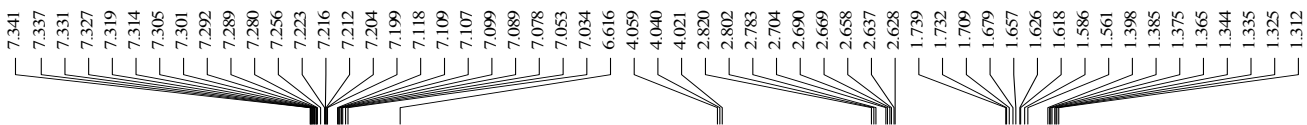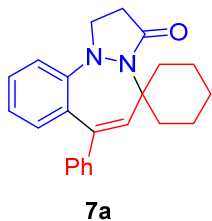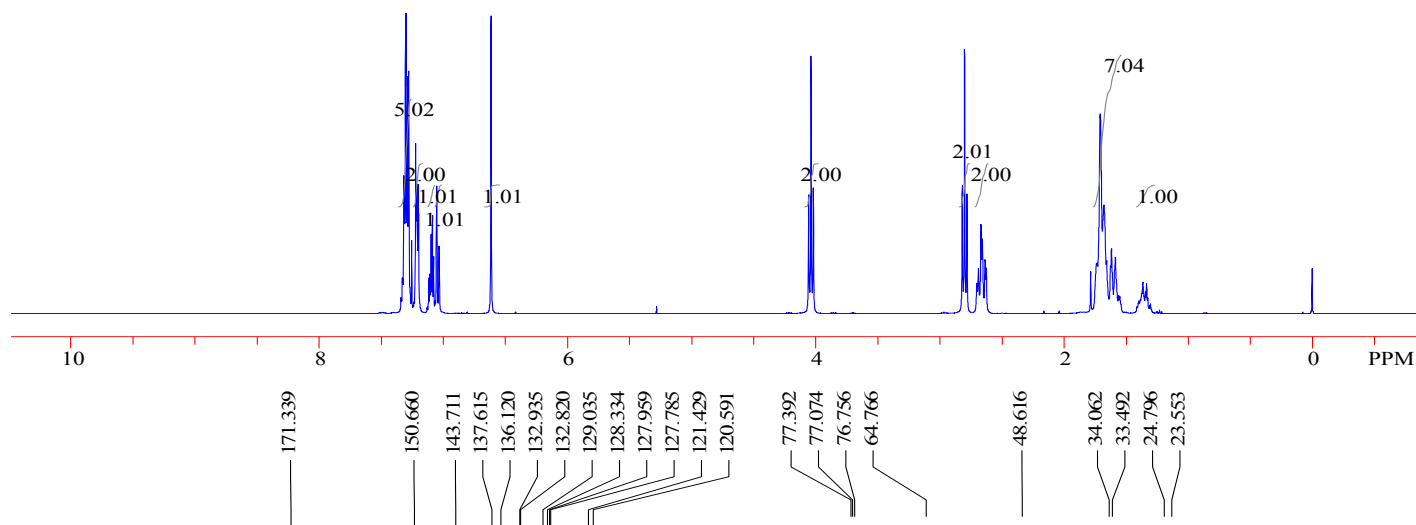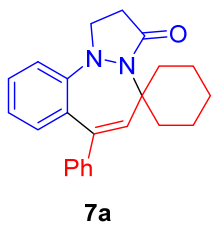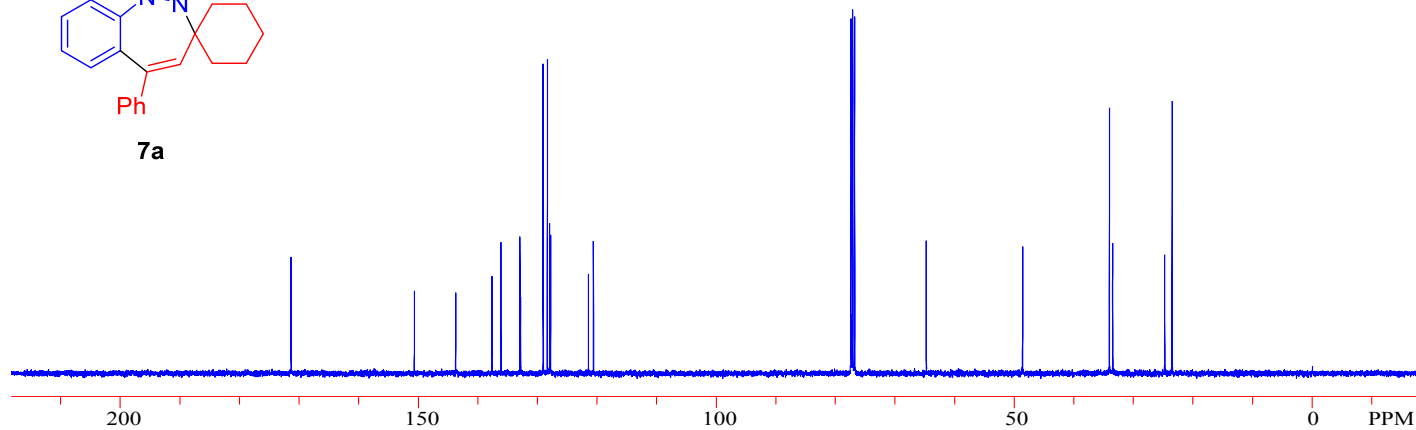

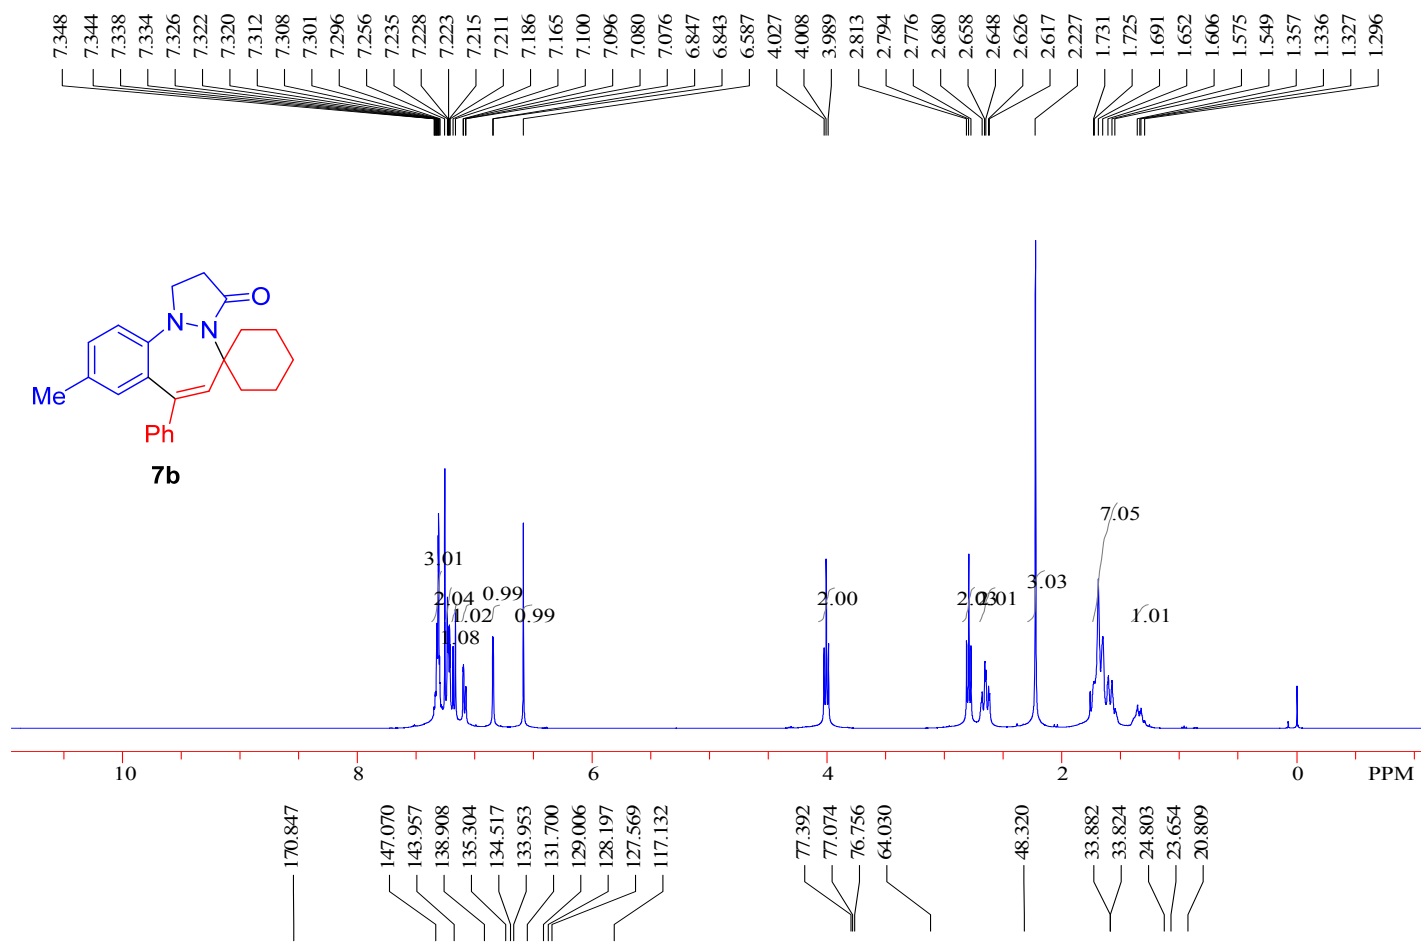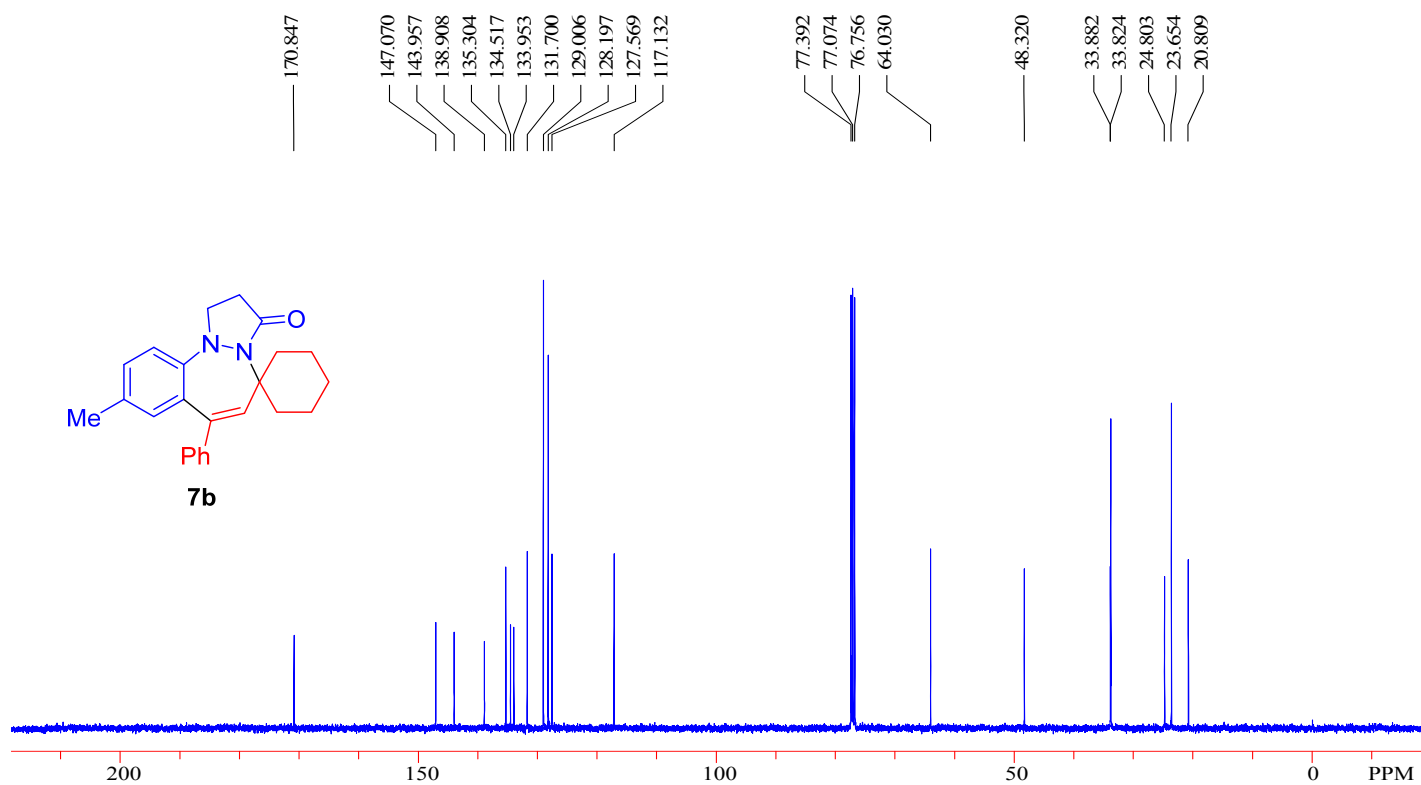

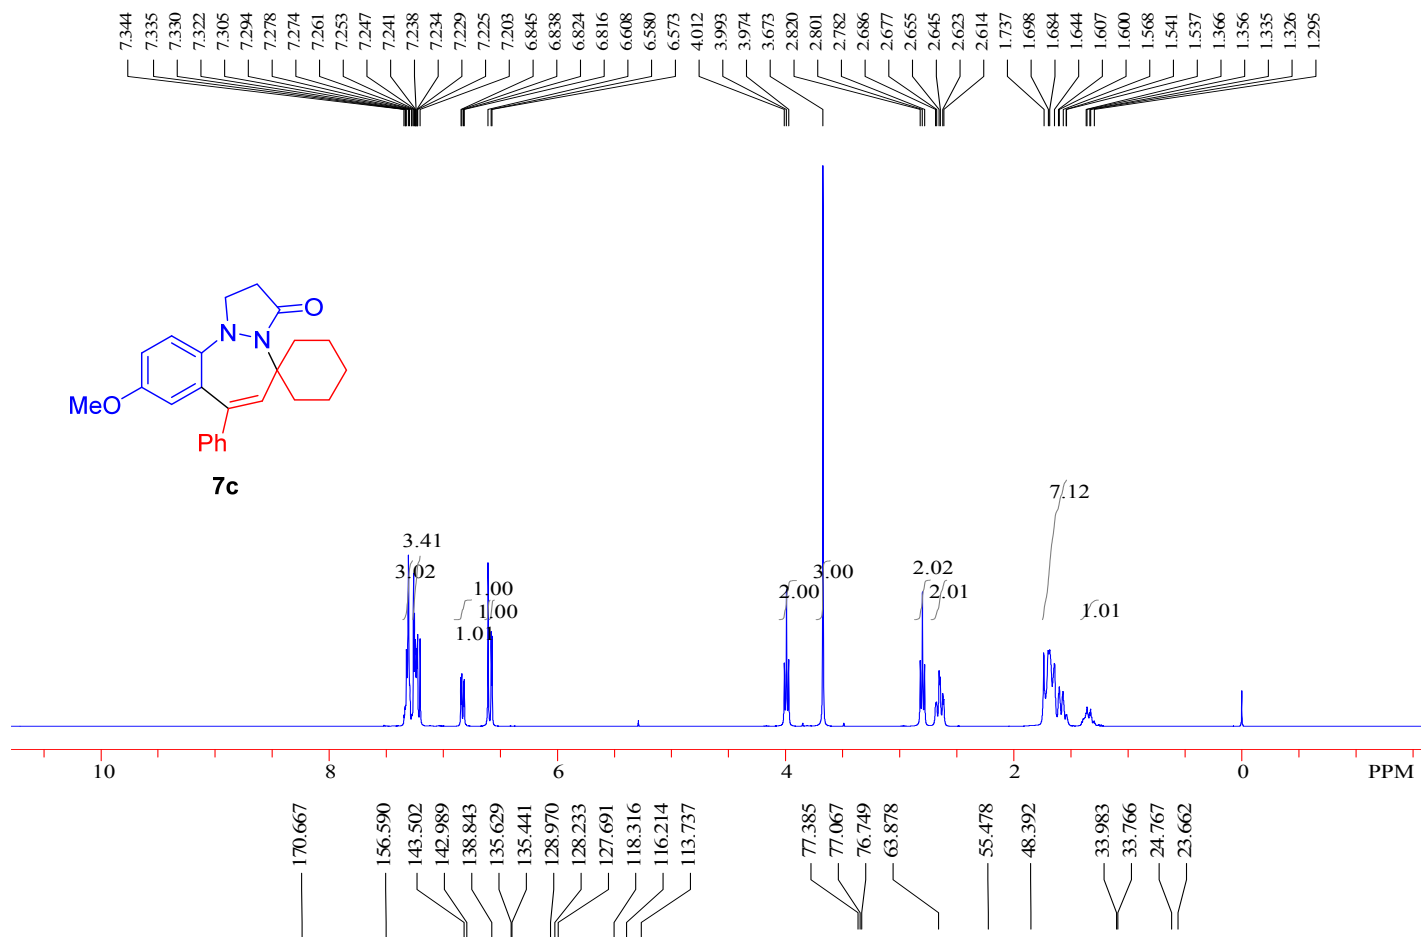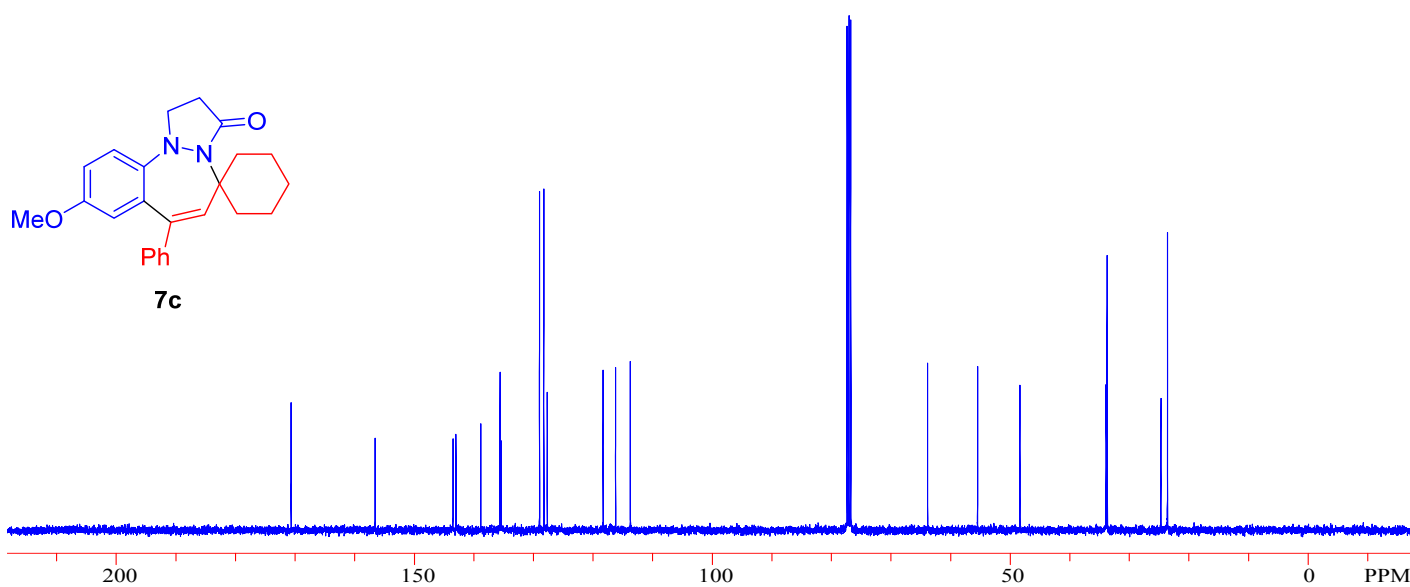



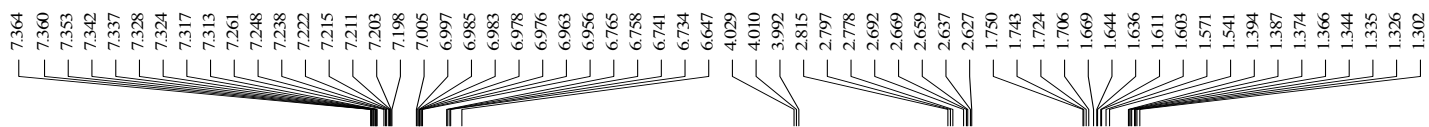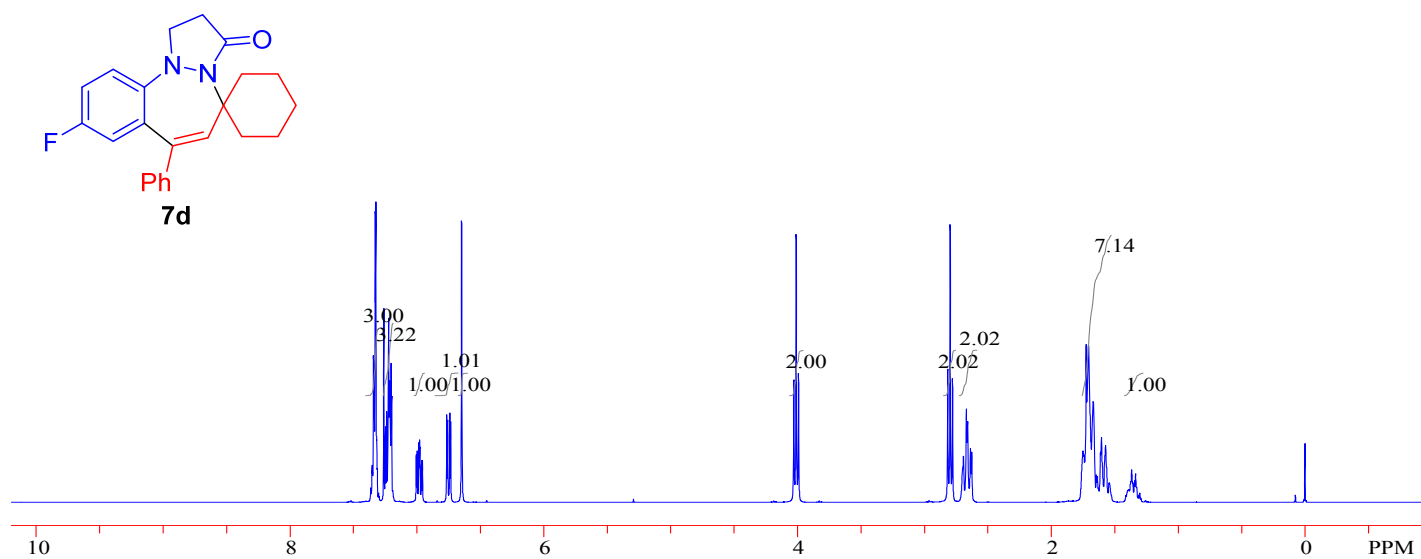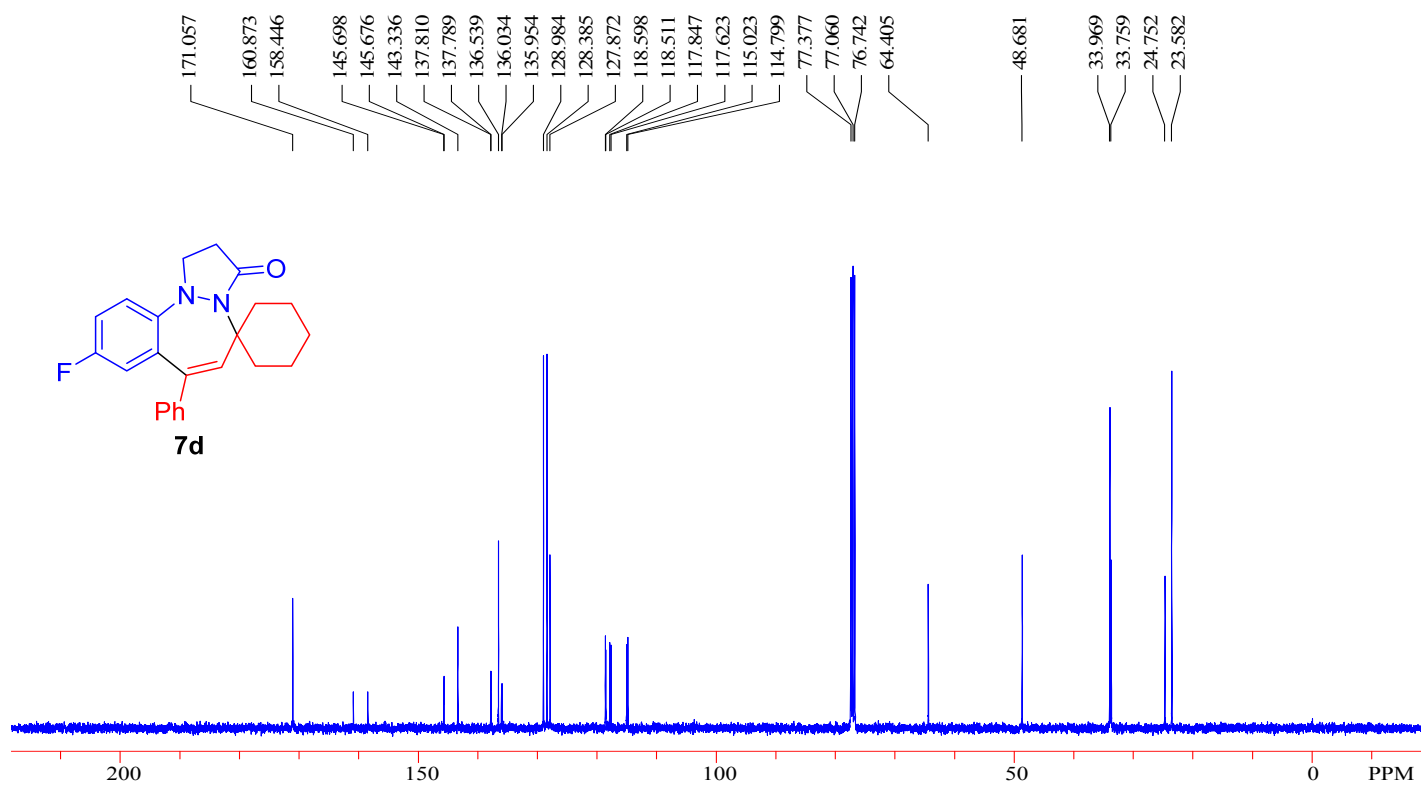

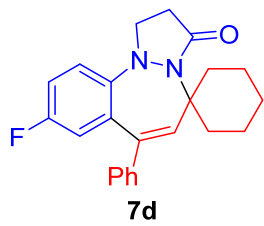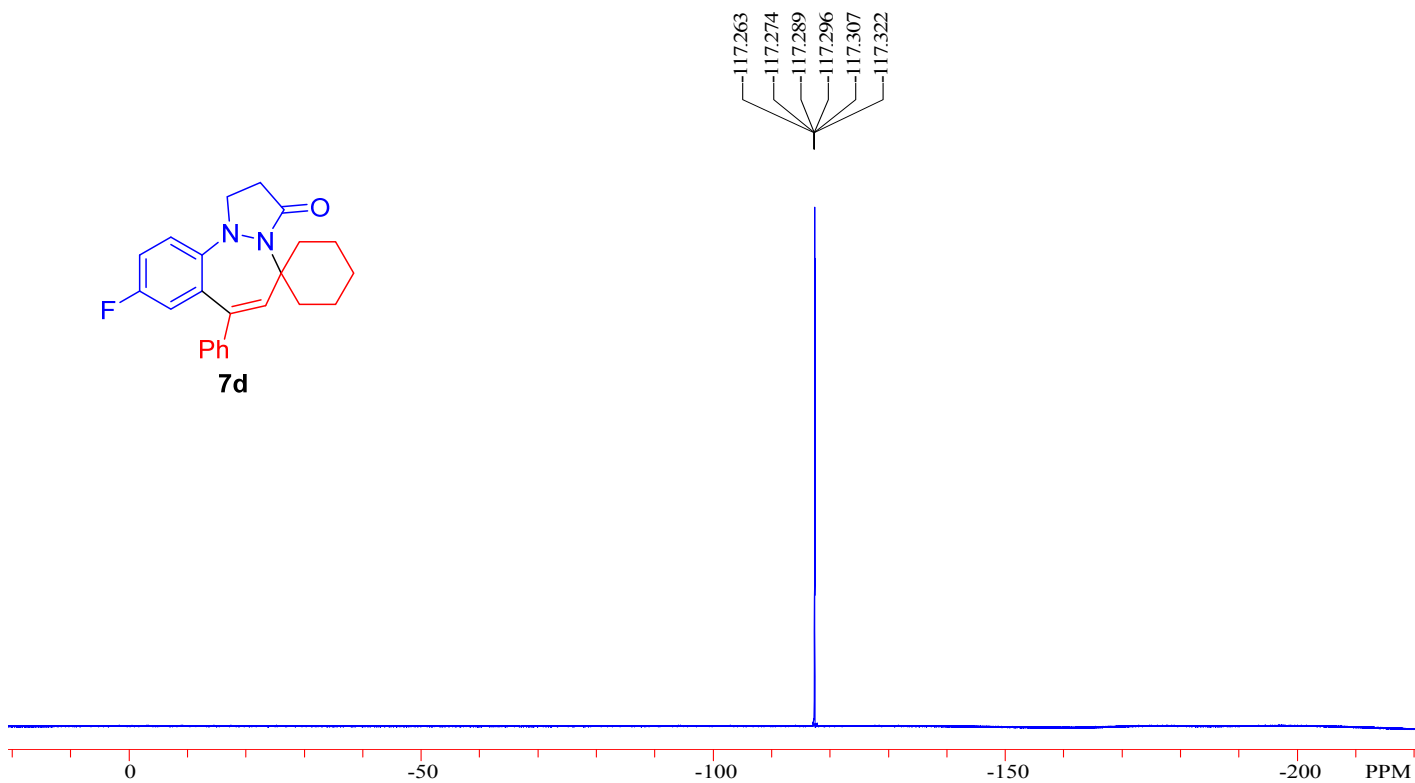

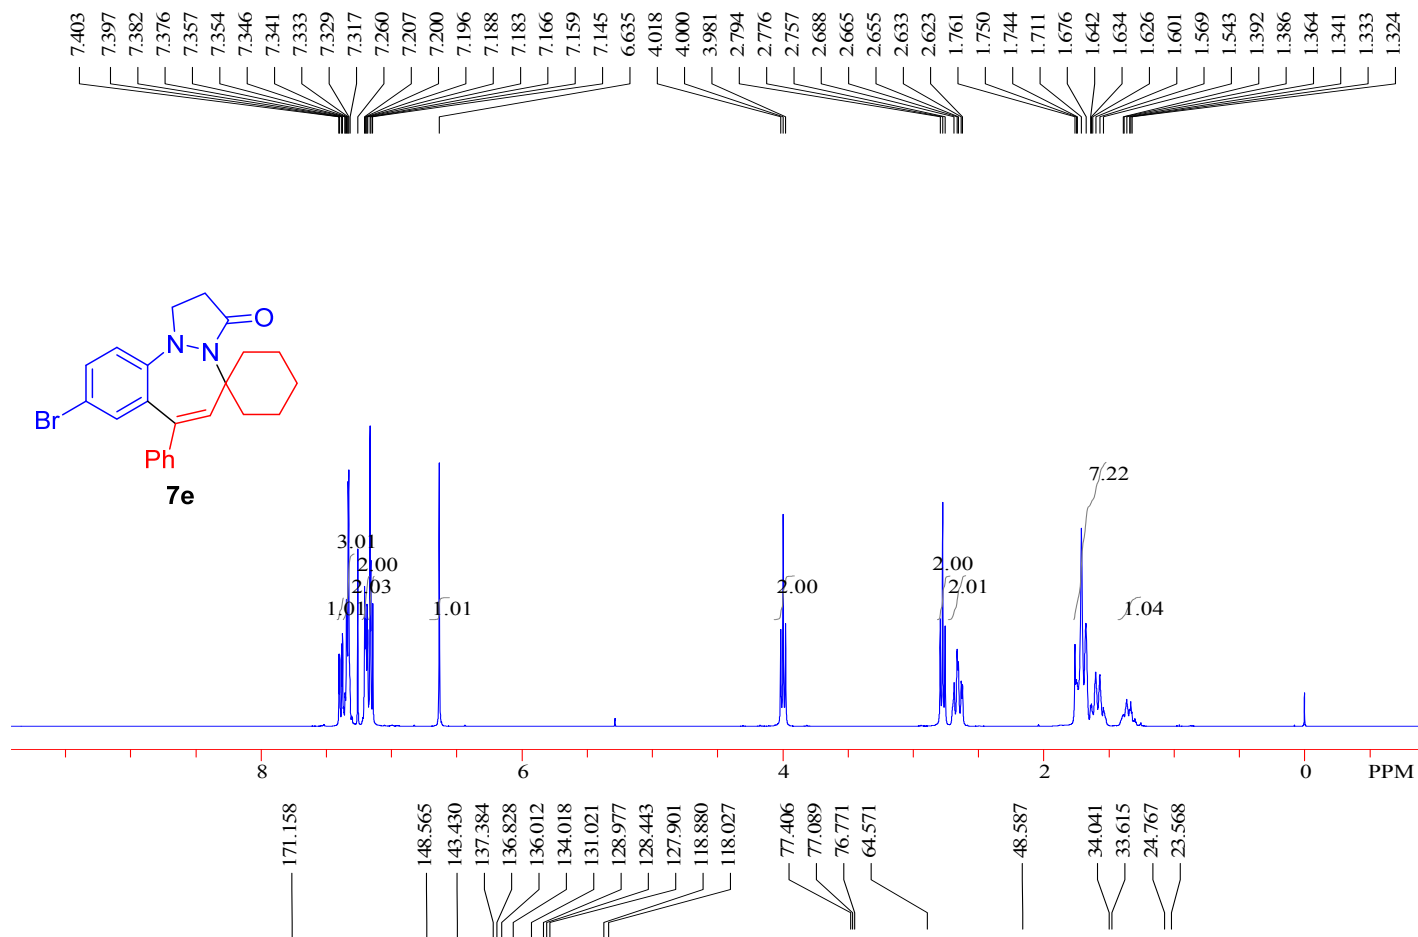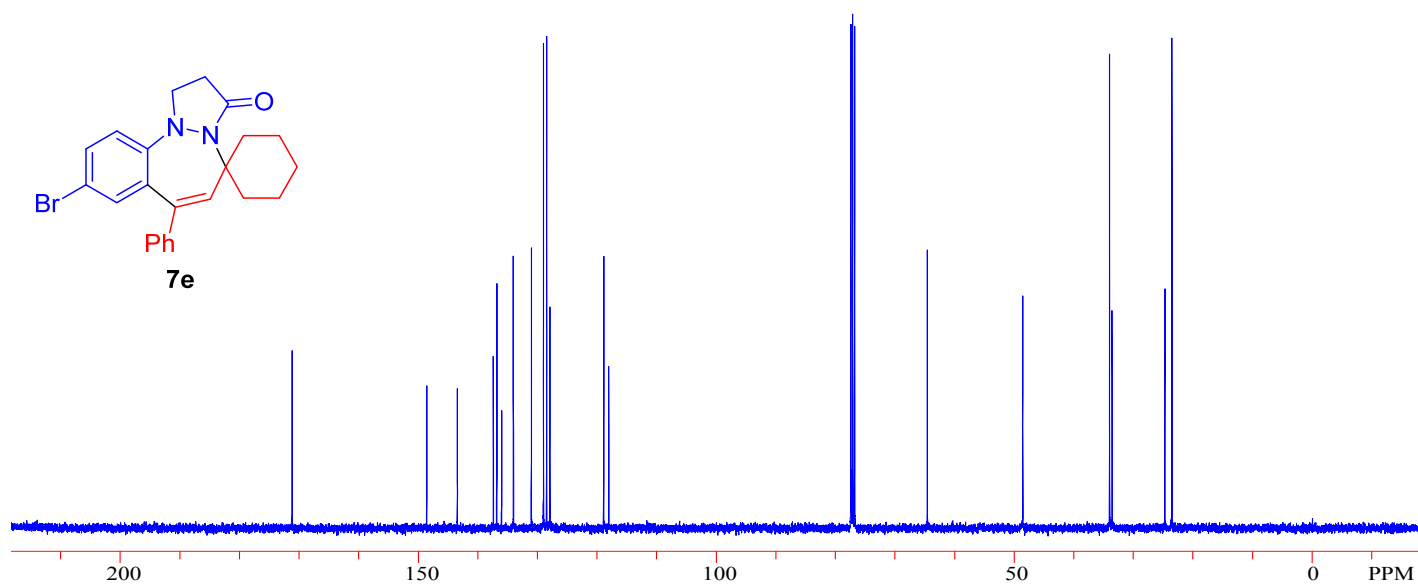

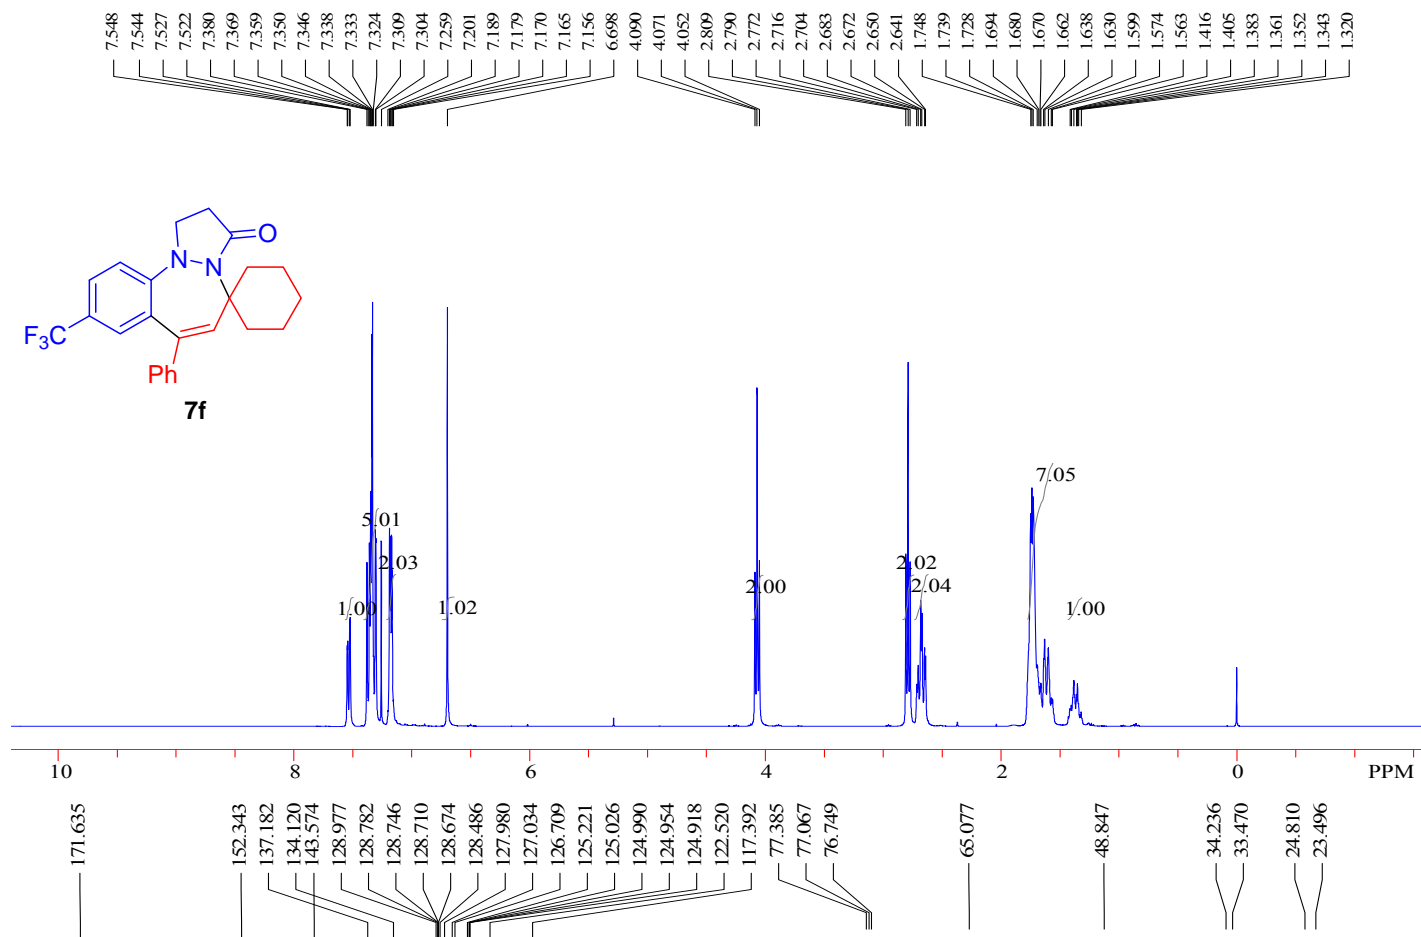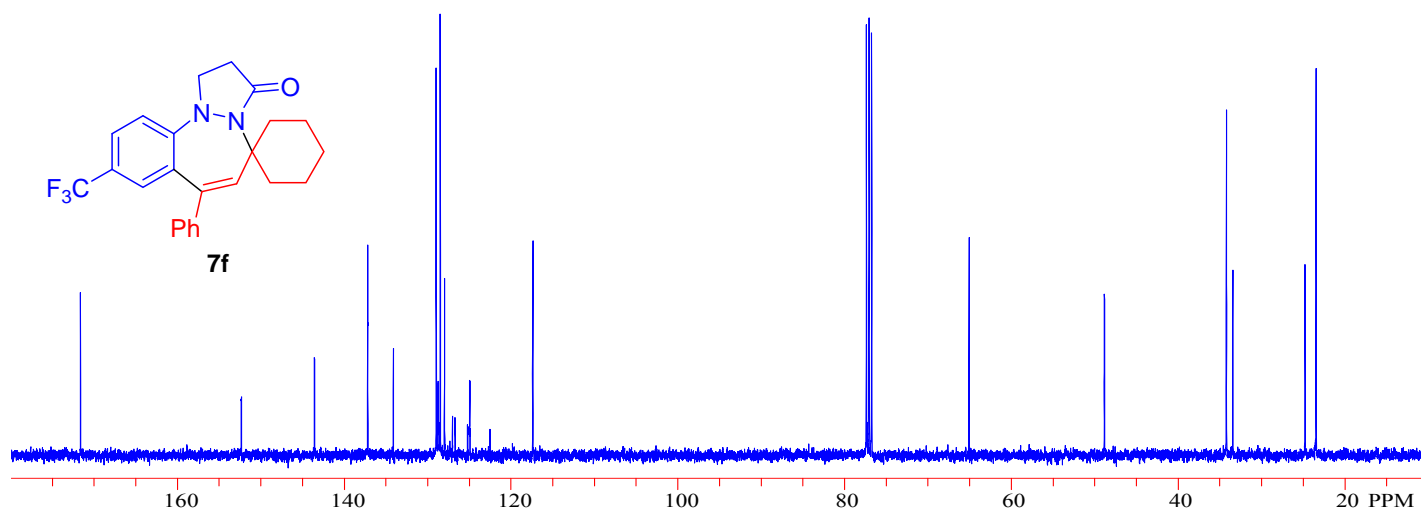

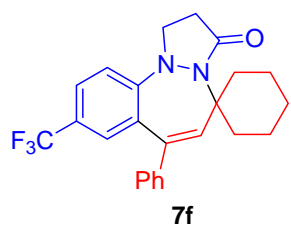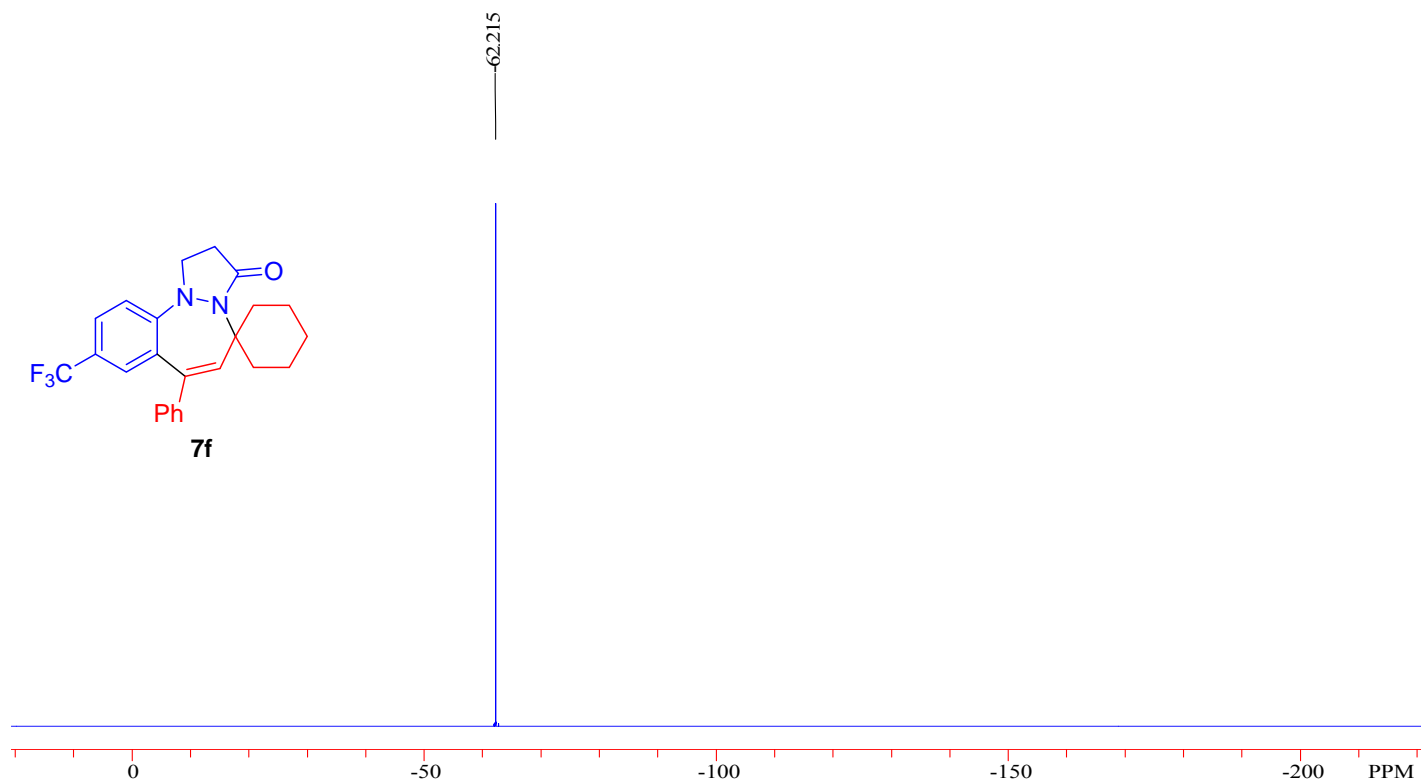

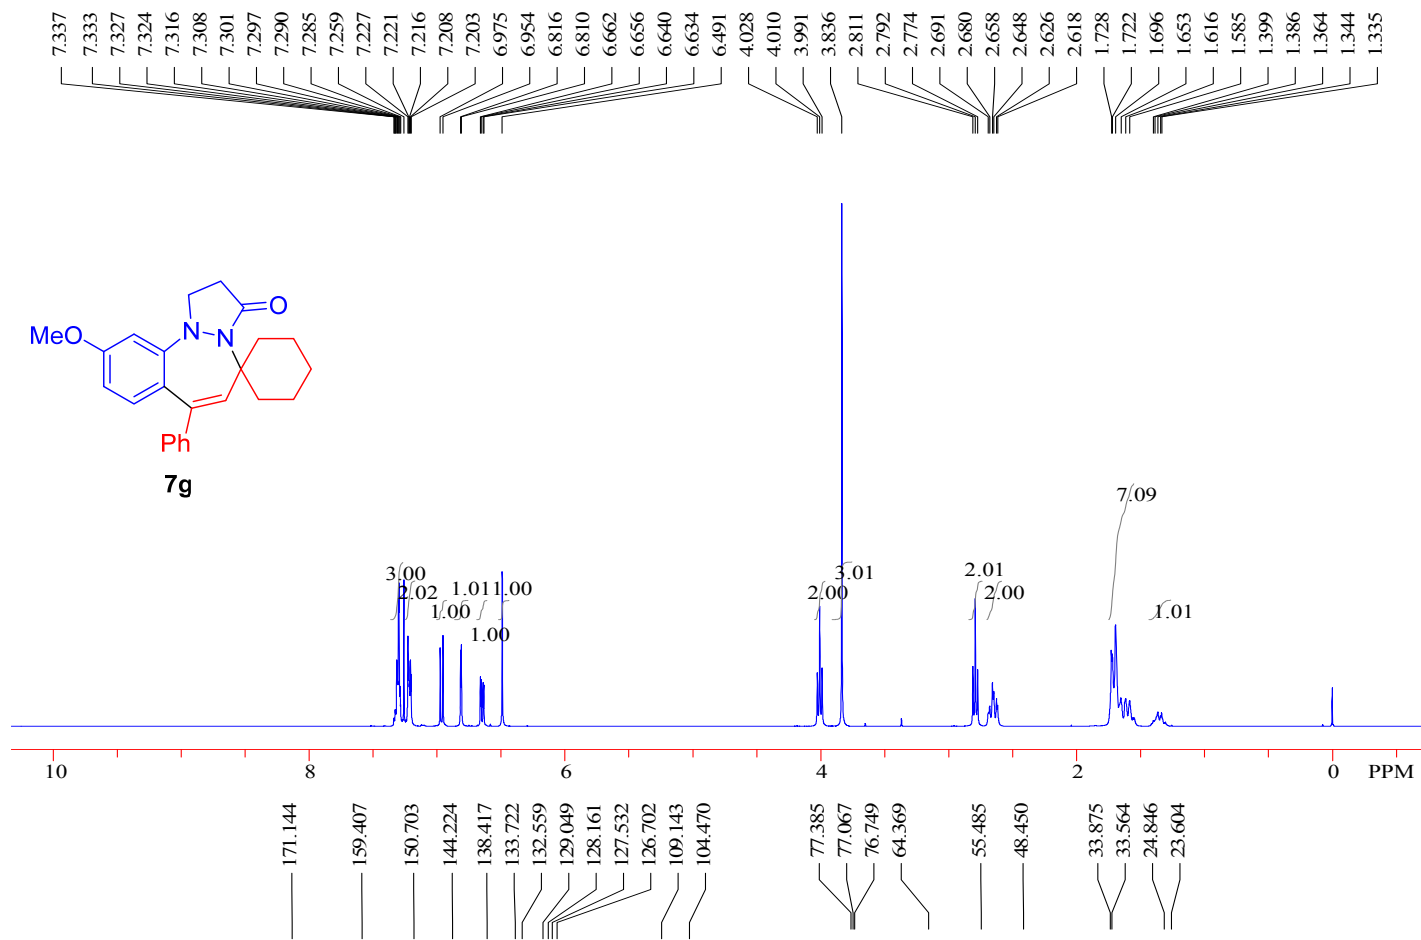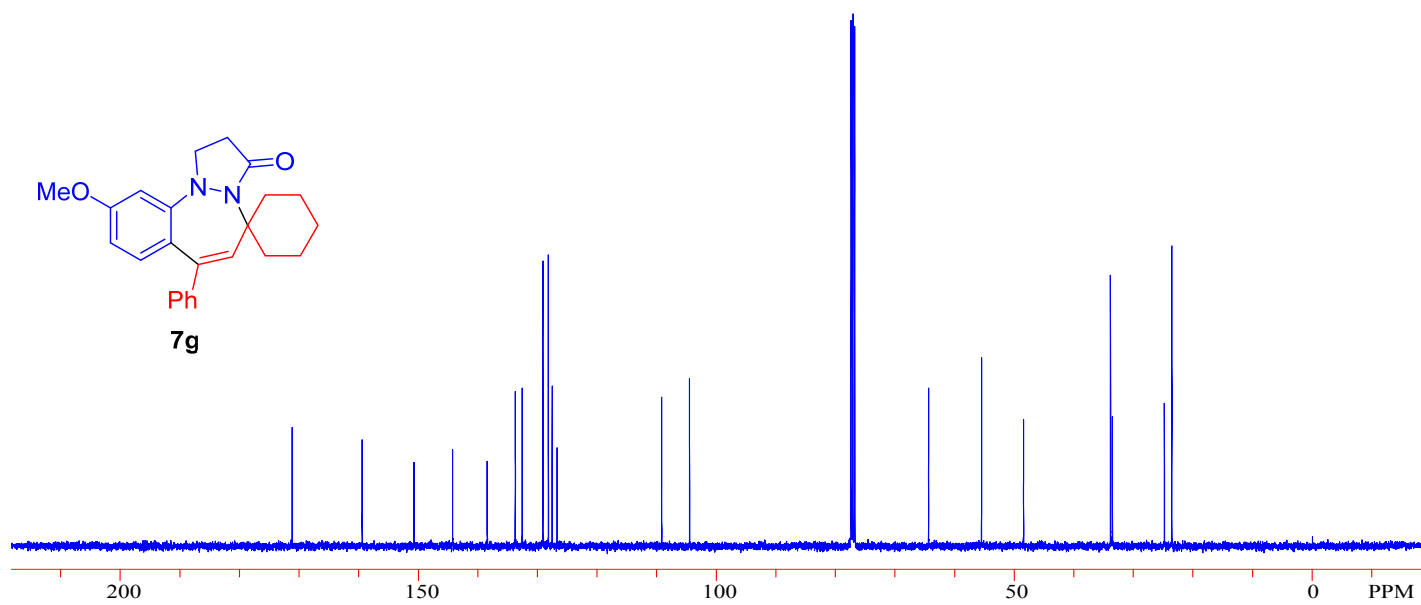

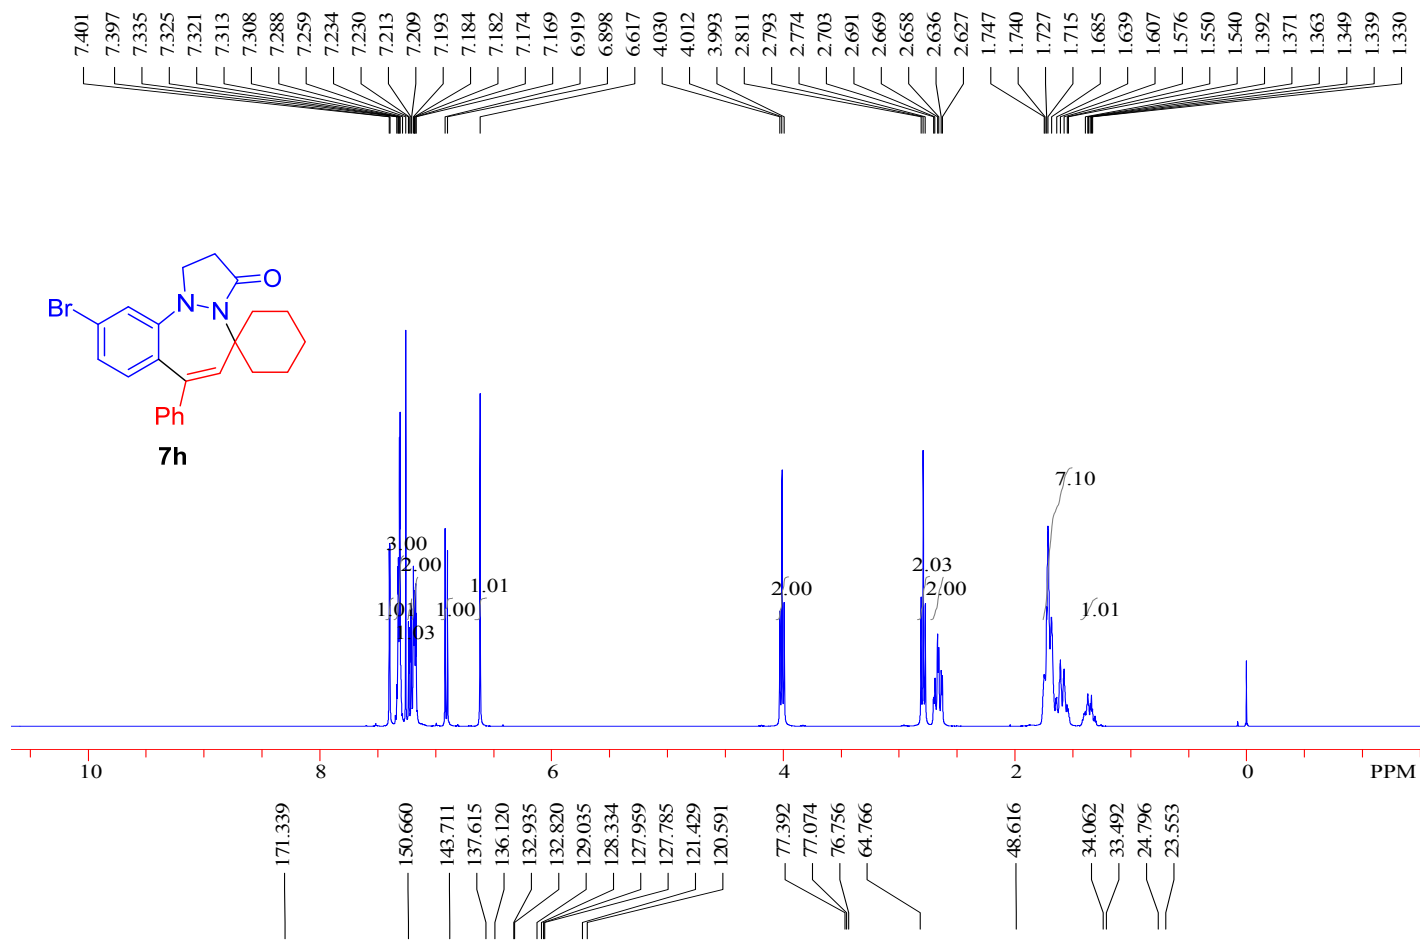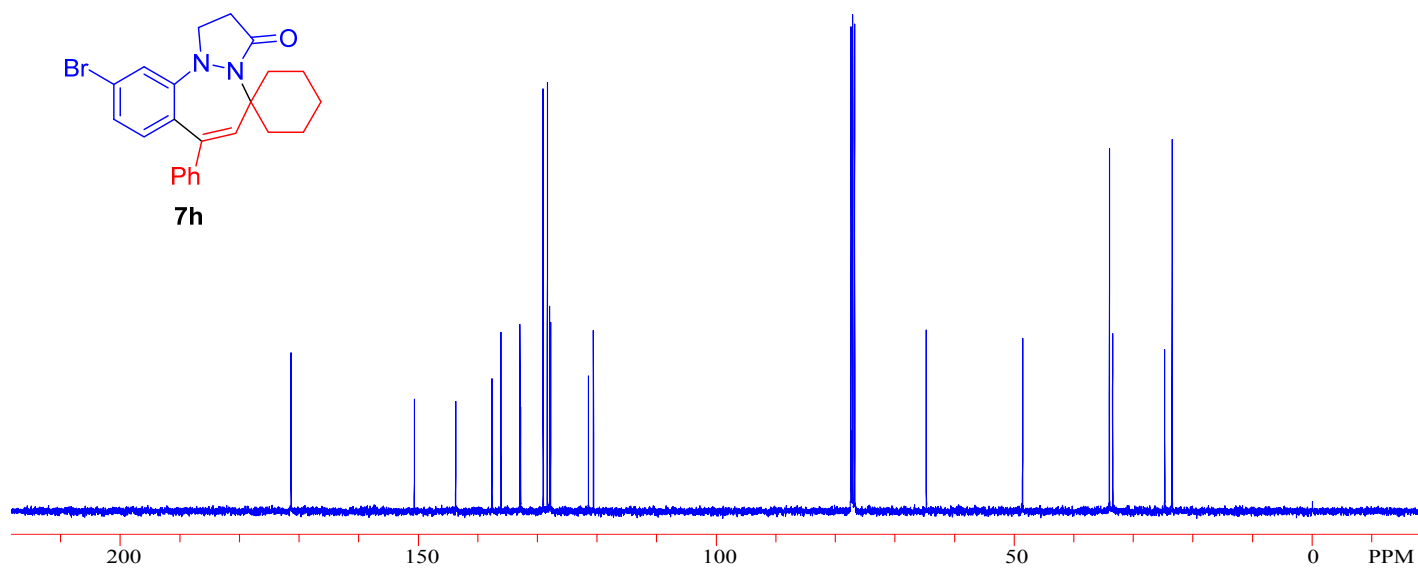

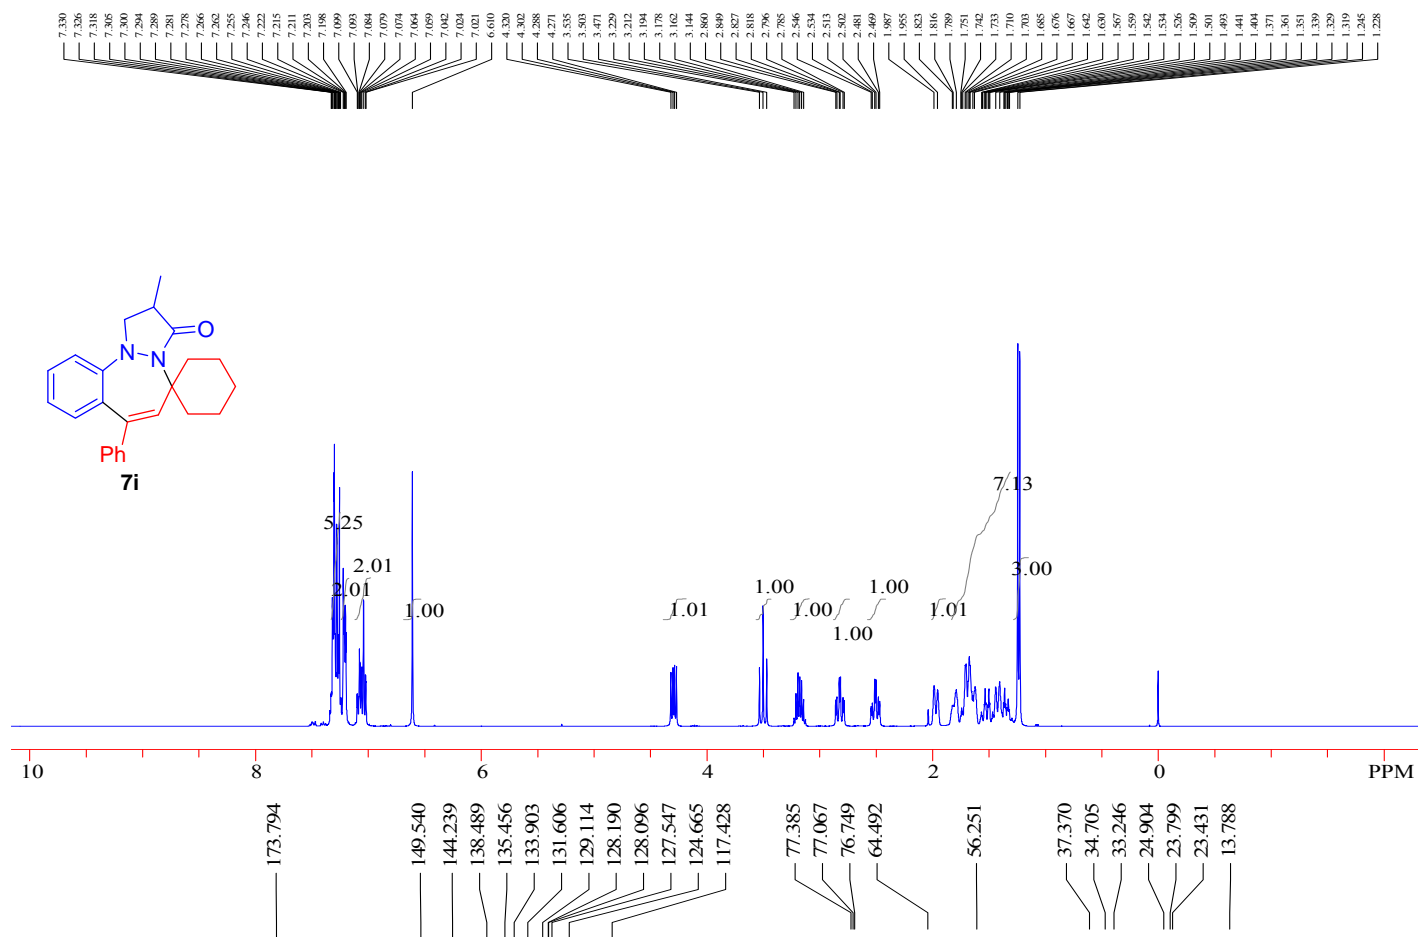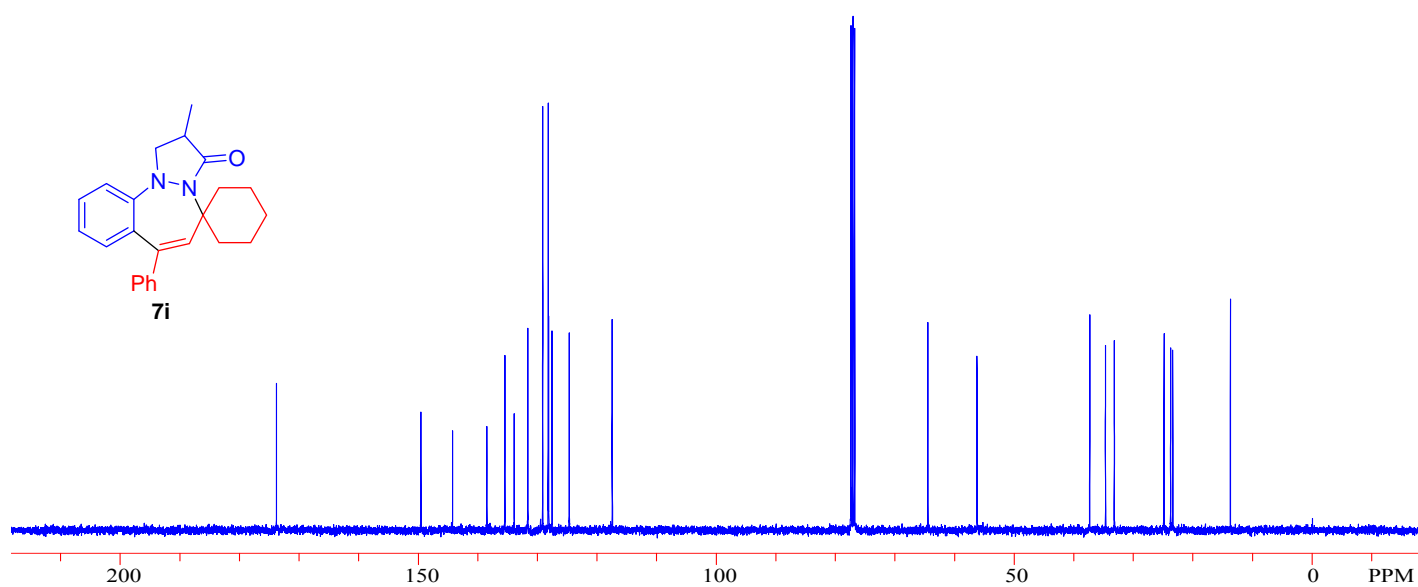



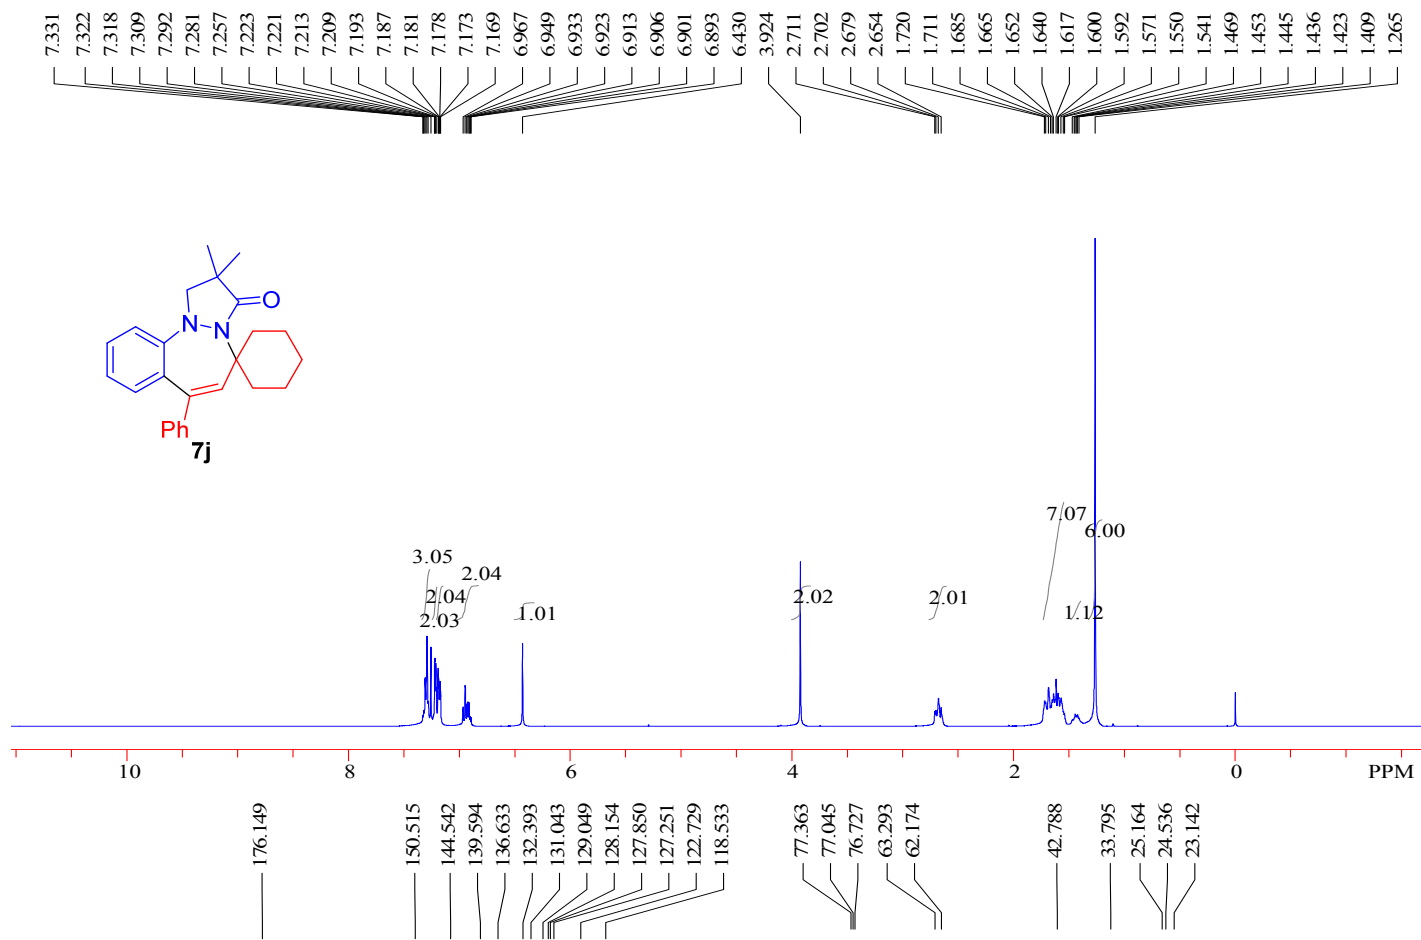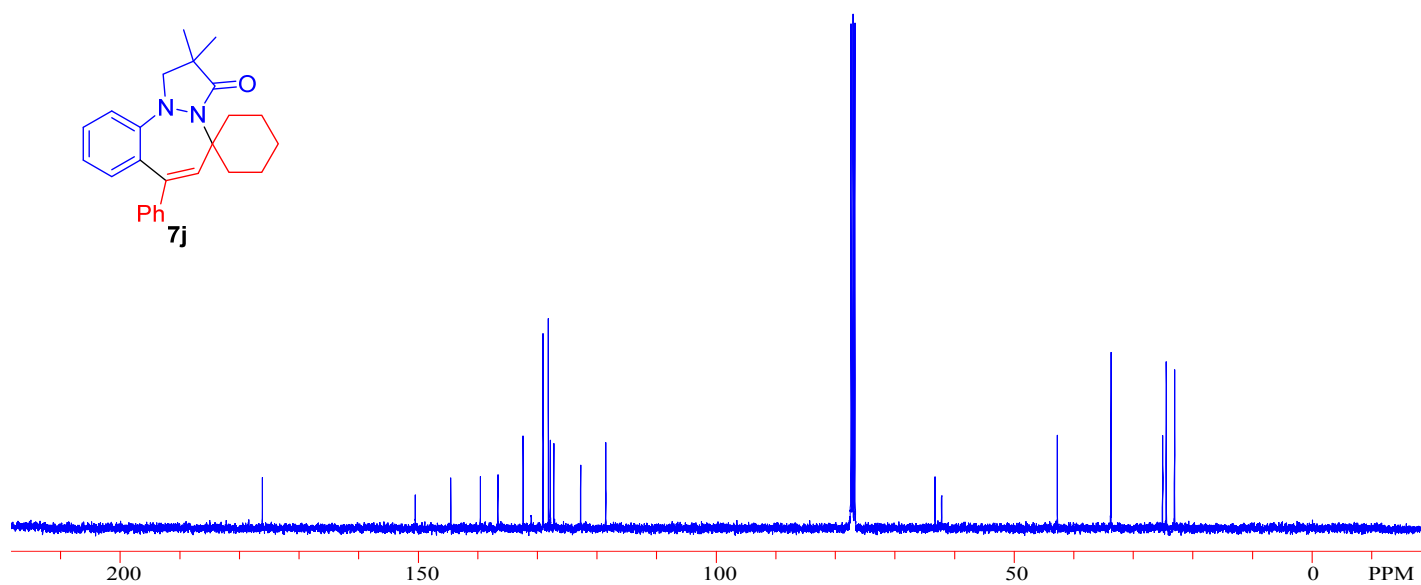

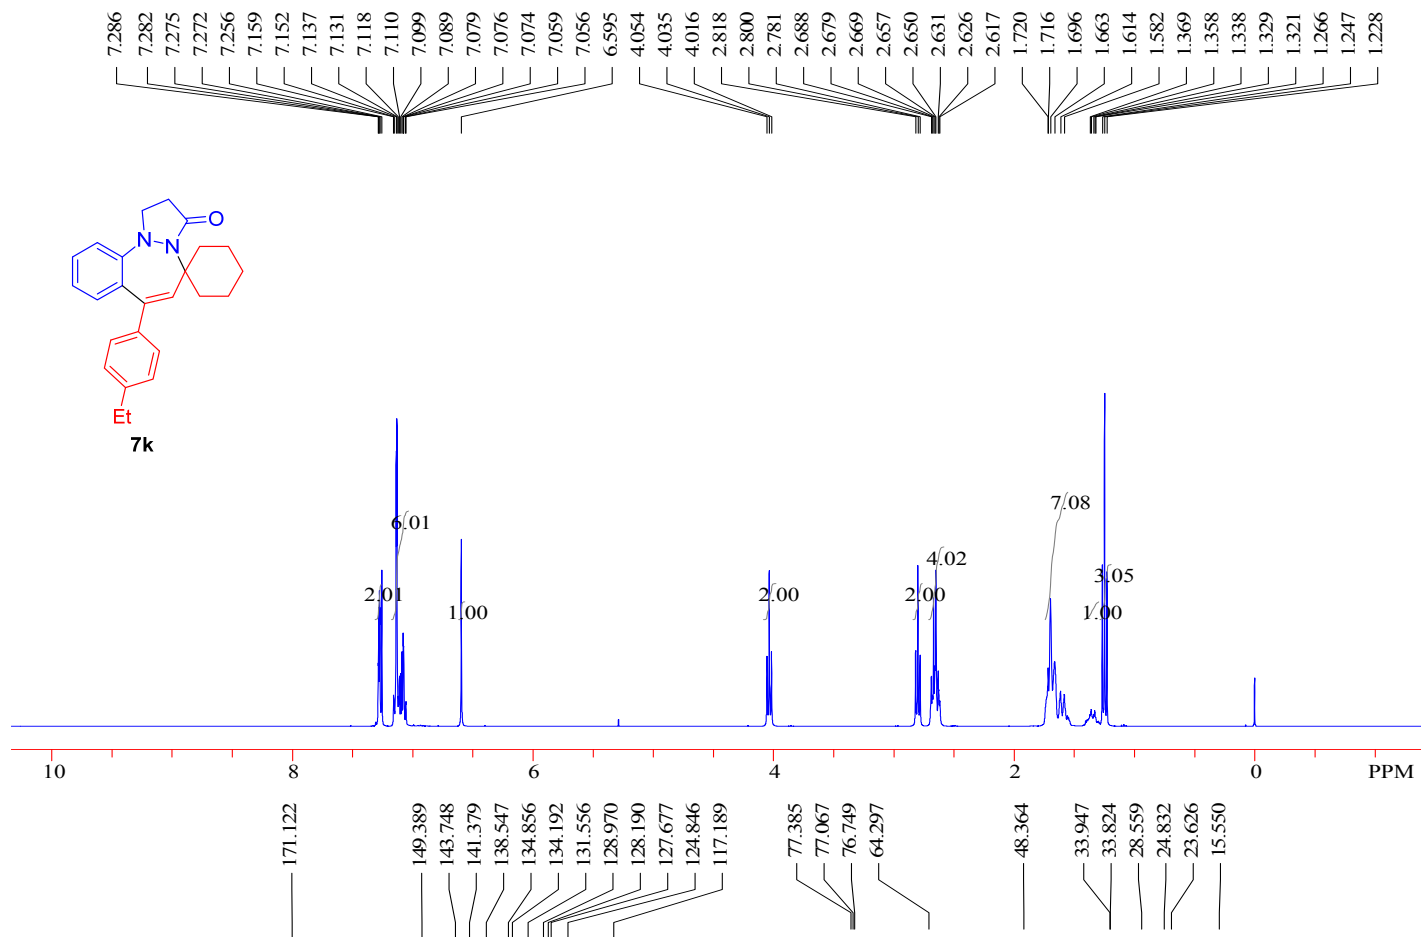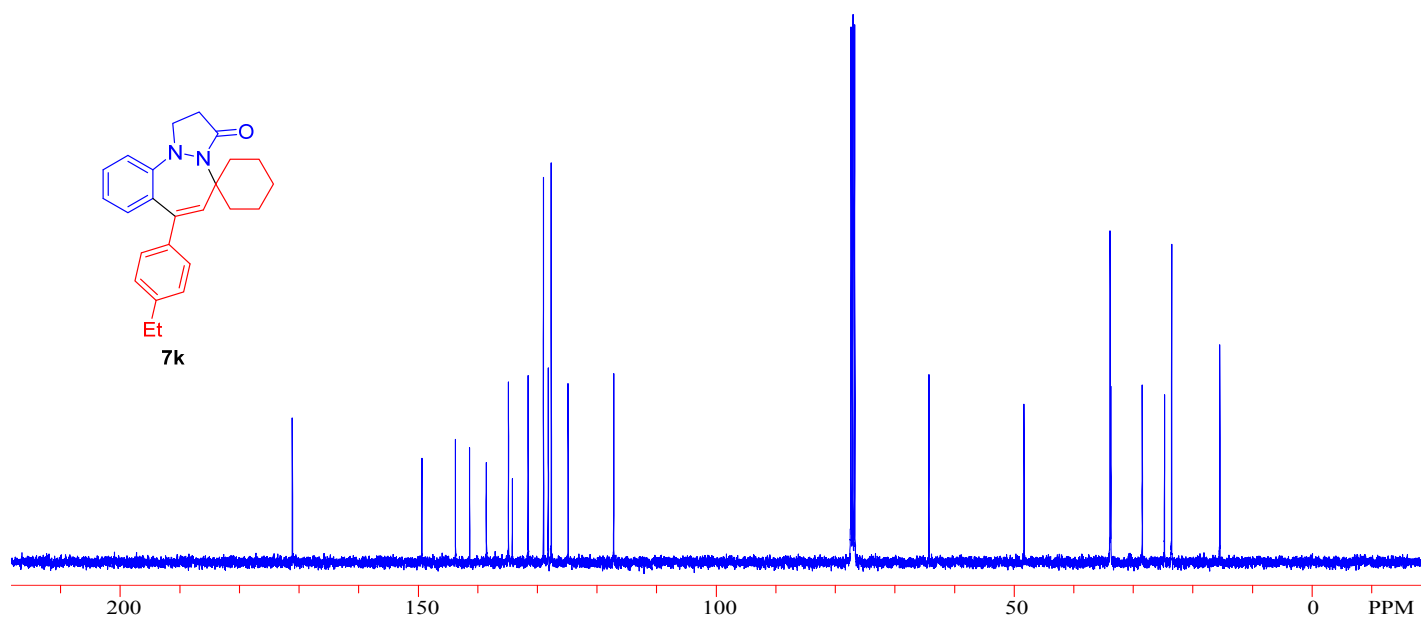

7.279 7.271 7.269 7.263 7.158 7.150 7.145 7.134 7.129 7.121 7.111 7.101 7.091 7.080 7.077 7.058 6.866 6.859 6.854 6.842 6.837 6.830 6.570 4.047 4.028 4.009 3.809 2.814 2.795 2.776 2.680 2.658 2.648 2.626 2.617 1.727 1.722 1.690 1.652 1.606 1.575 1.549 1.352 1.332 1.323

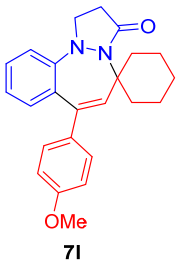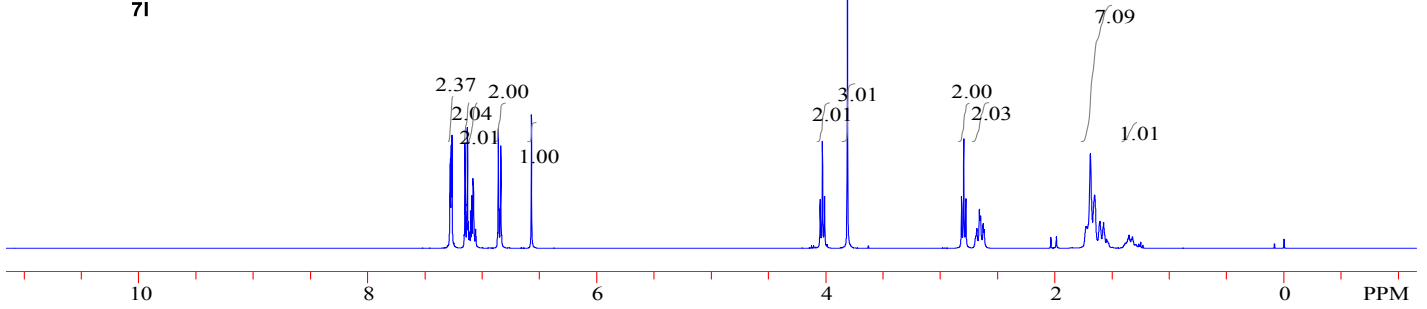

171.006 159.284 149.381 138.273 136.510 134.257 134.242 131.491 130.147 128.255 124.889 117.247 113.578 77.479 77.161 76.843 64.174 55.312 48.320 33.925 33.810 24.825 23.669

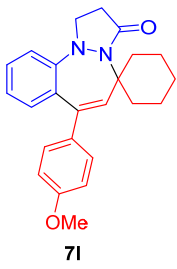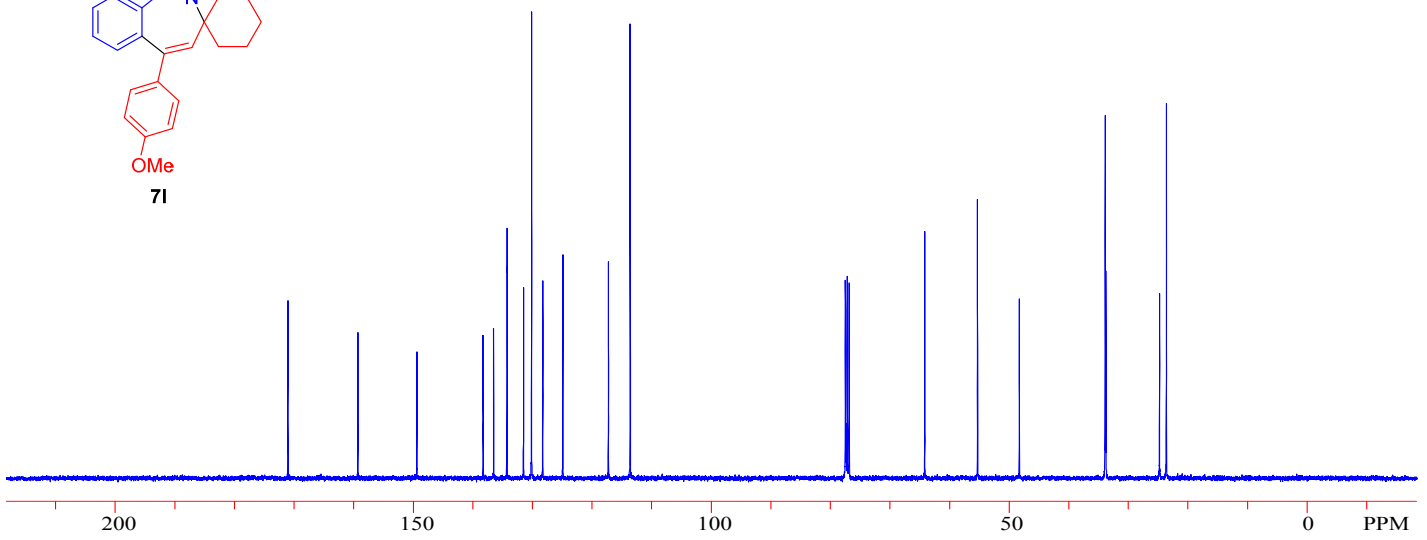

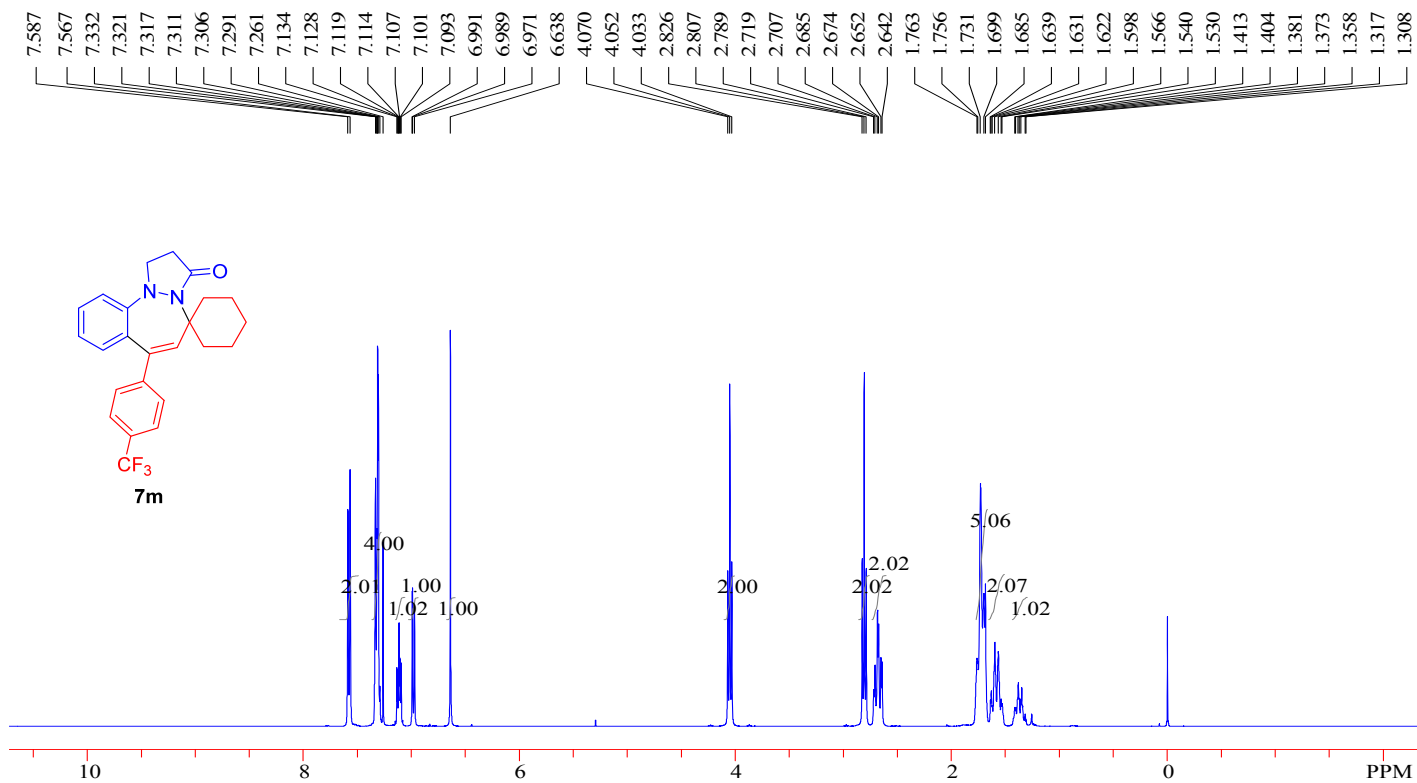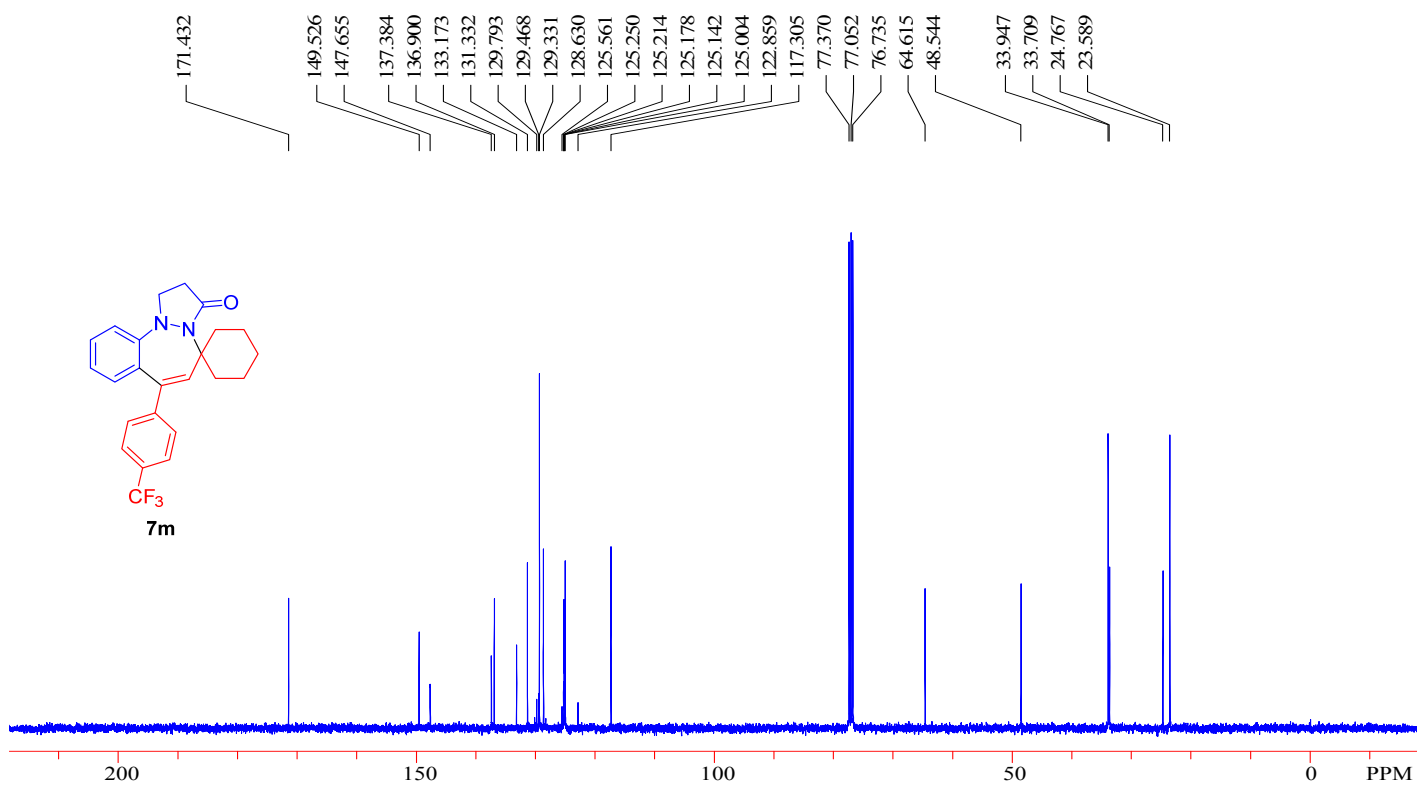

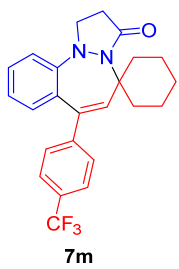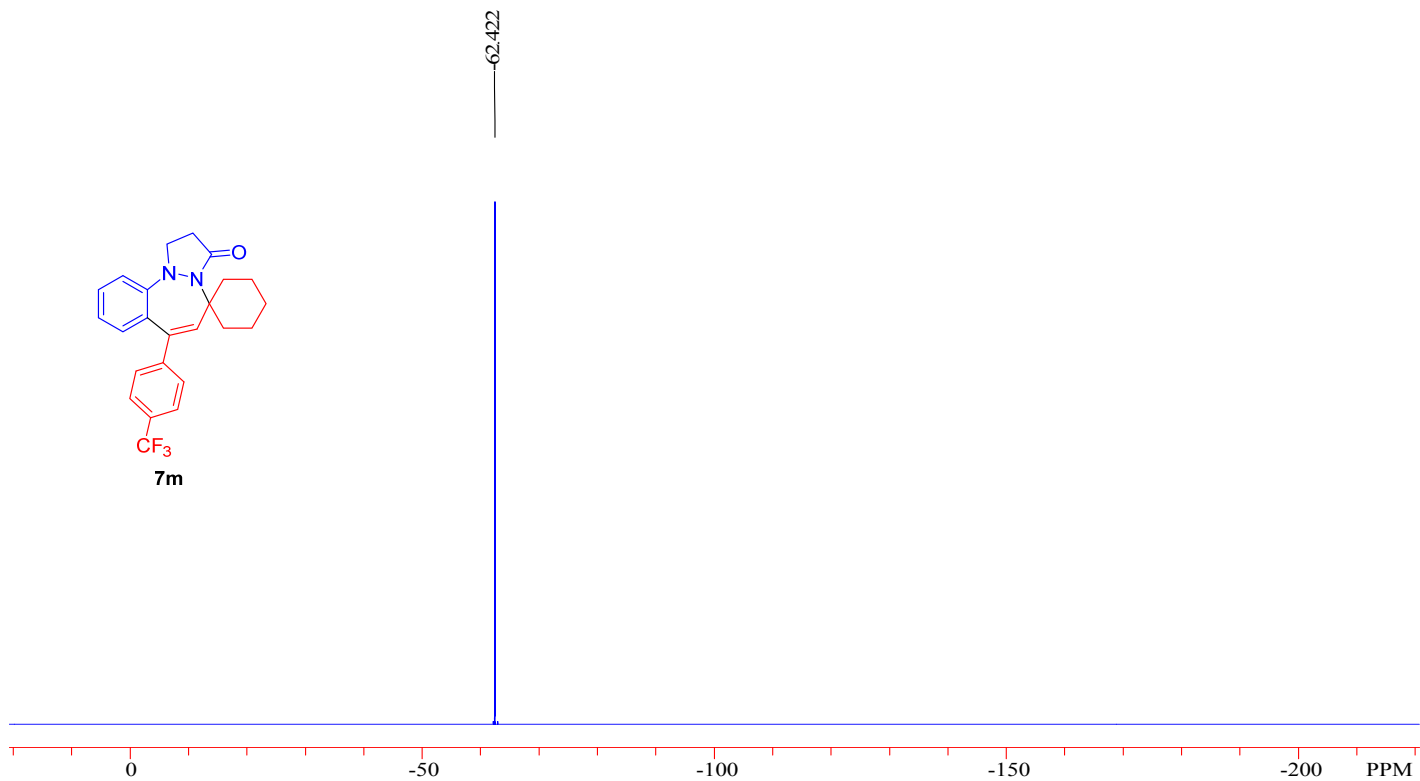

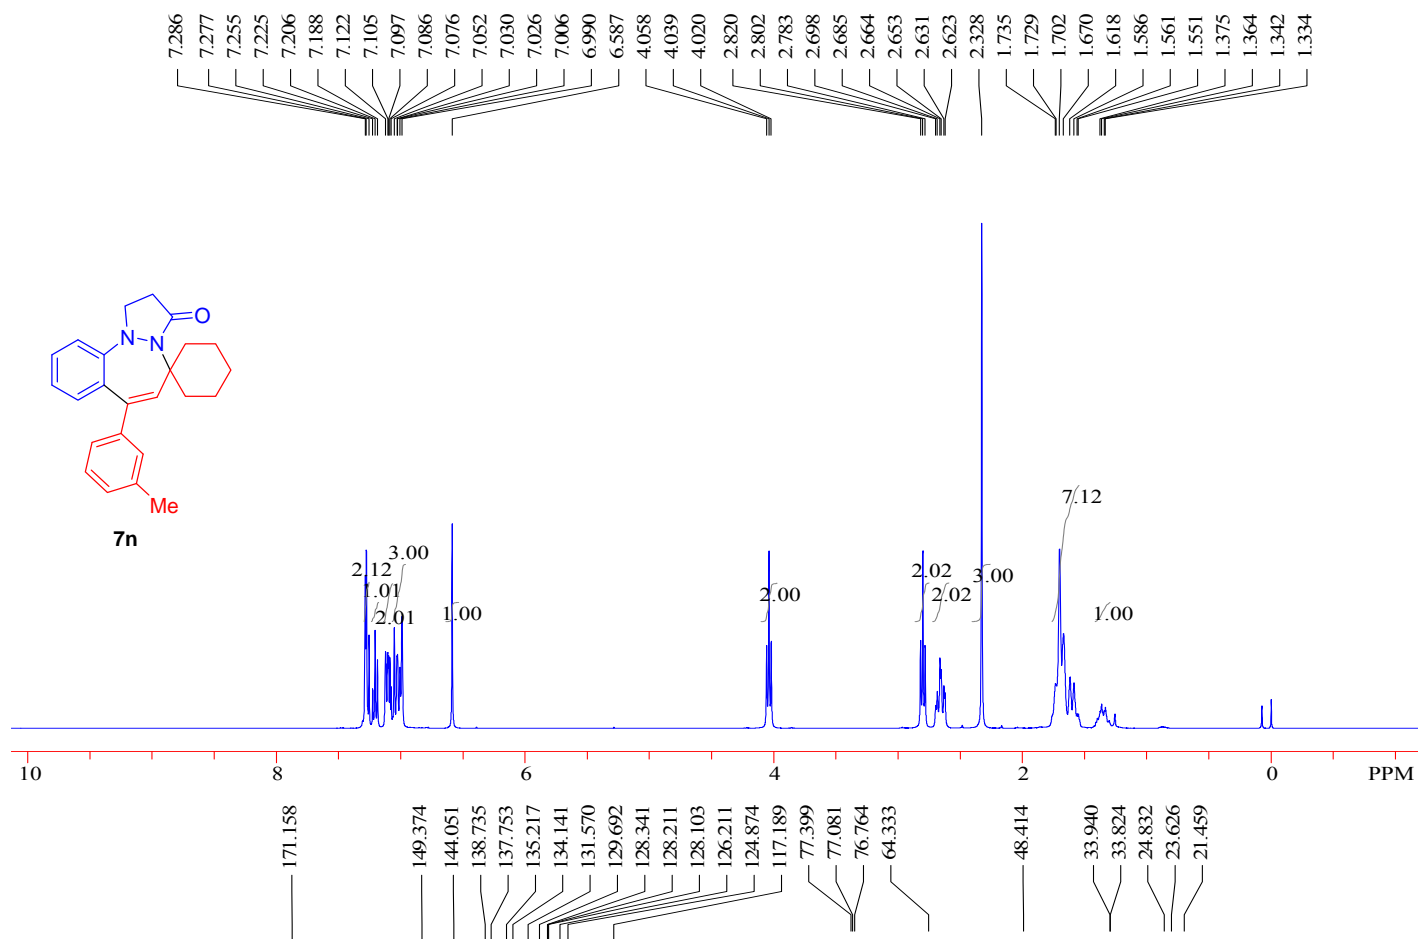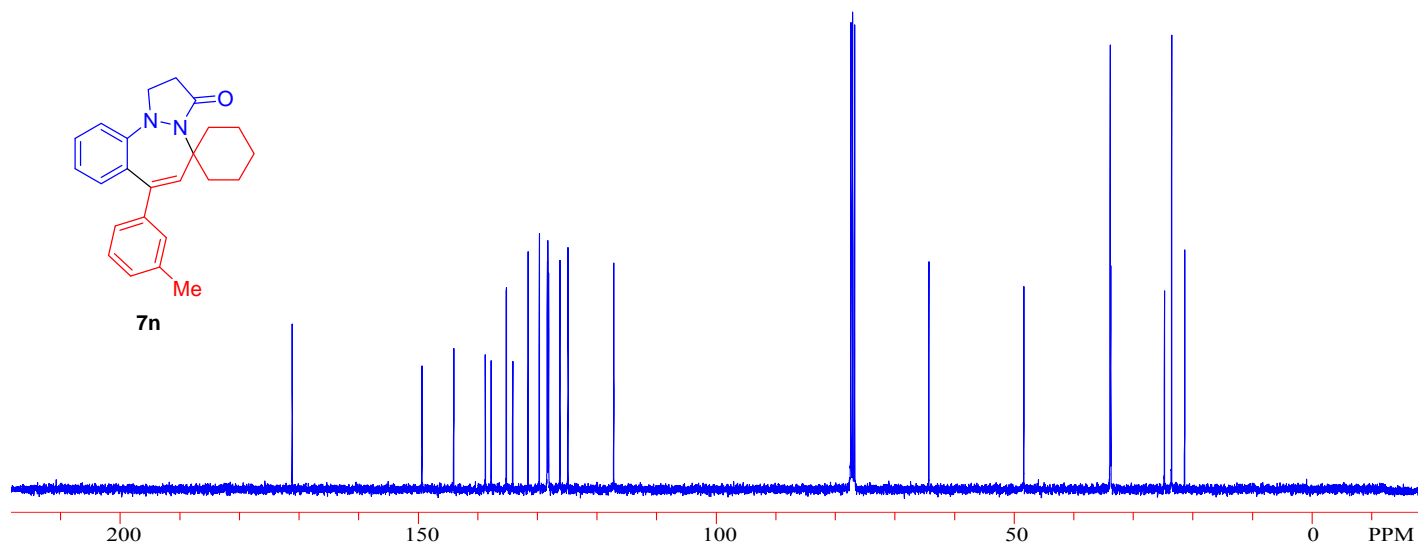

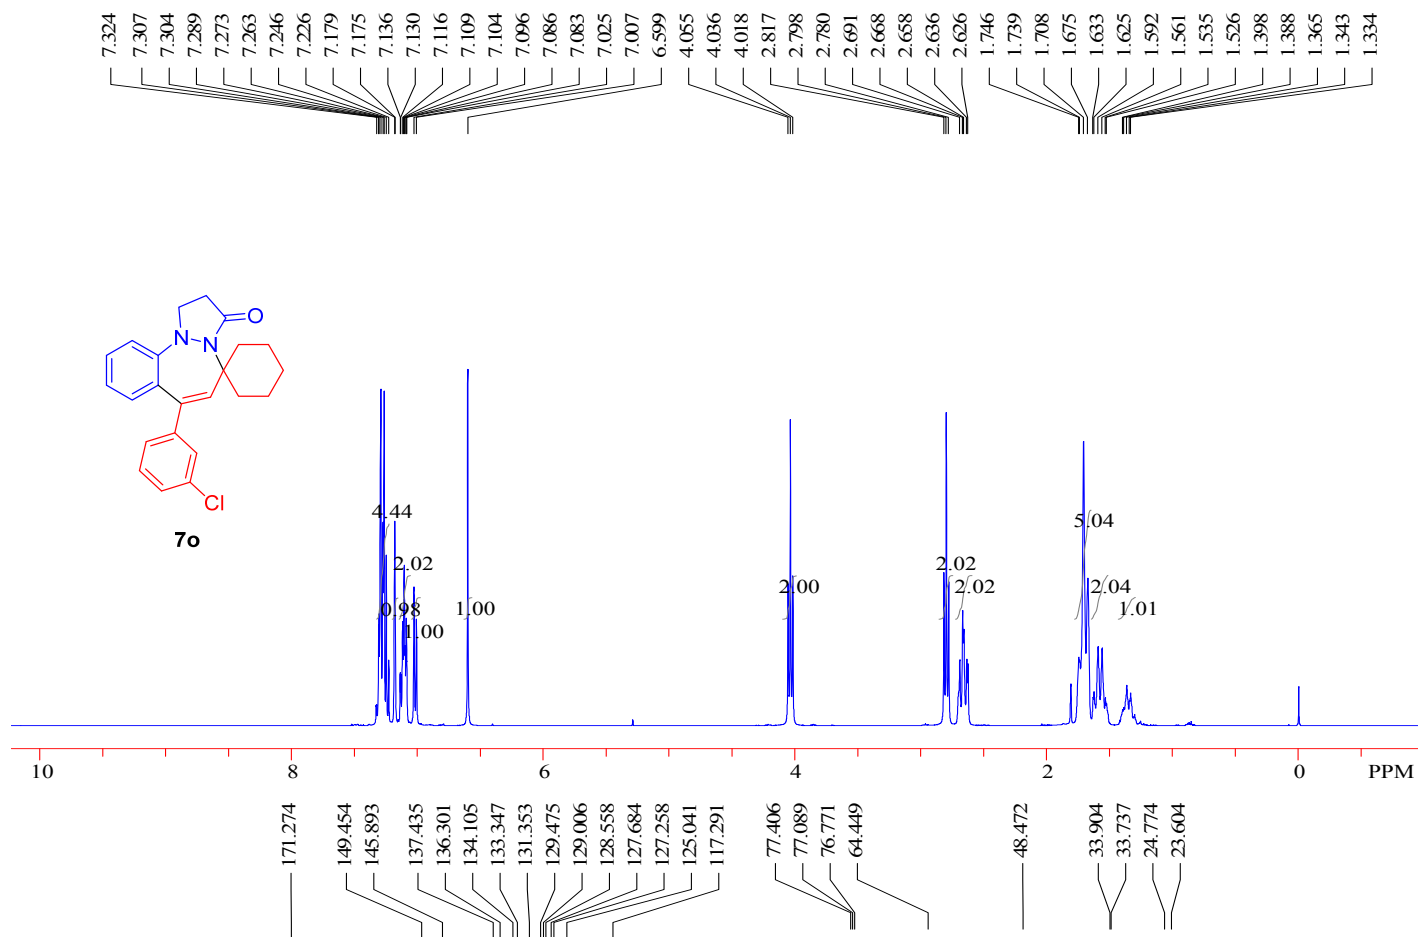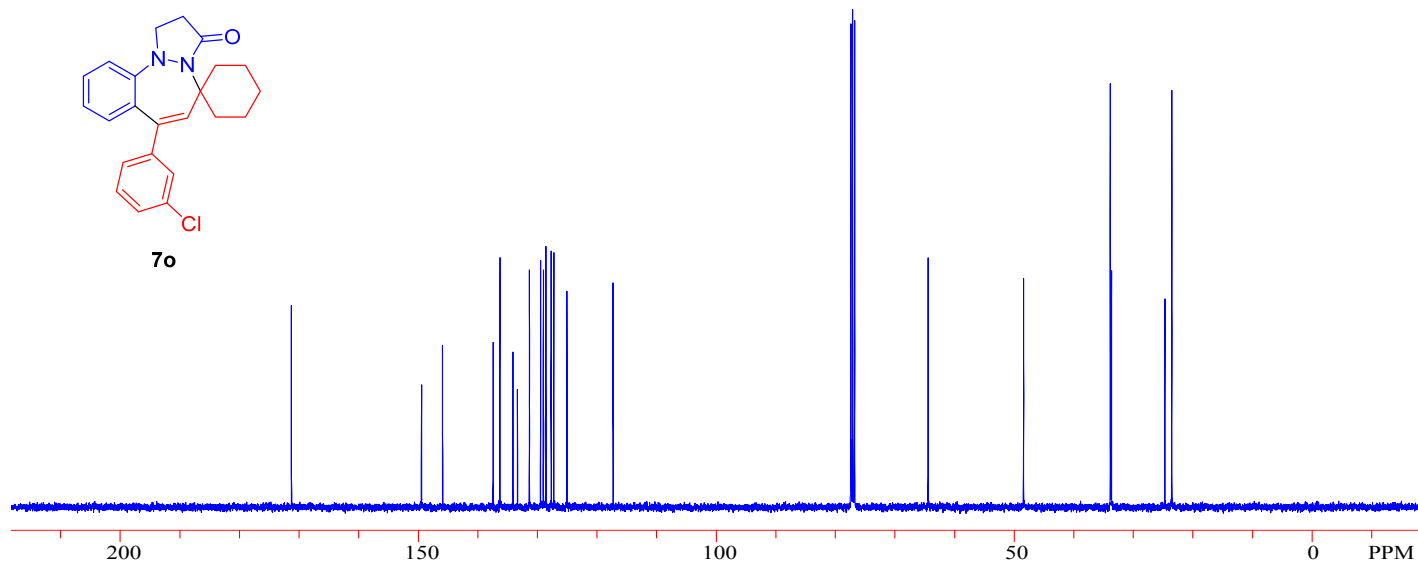

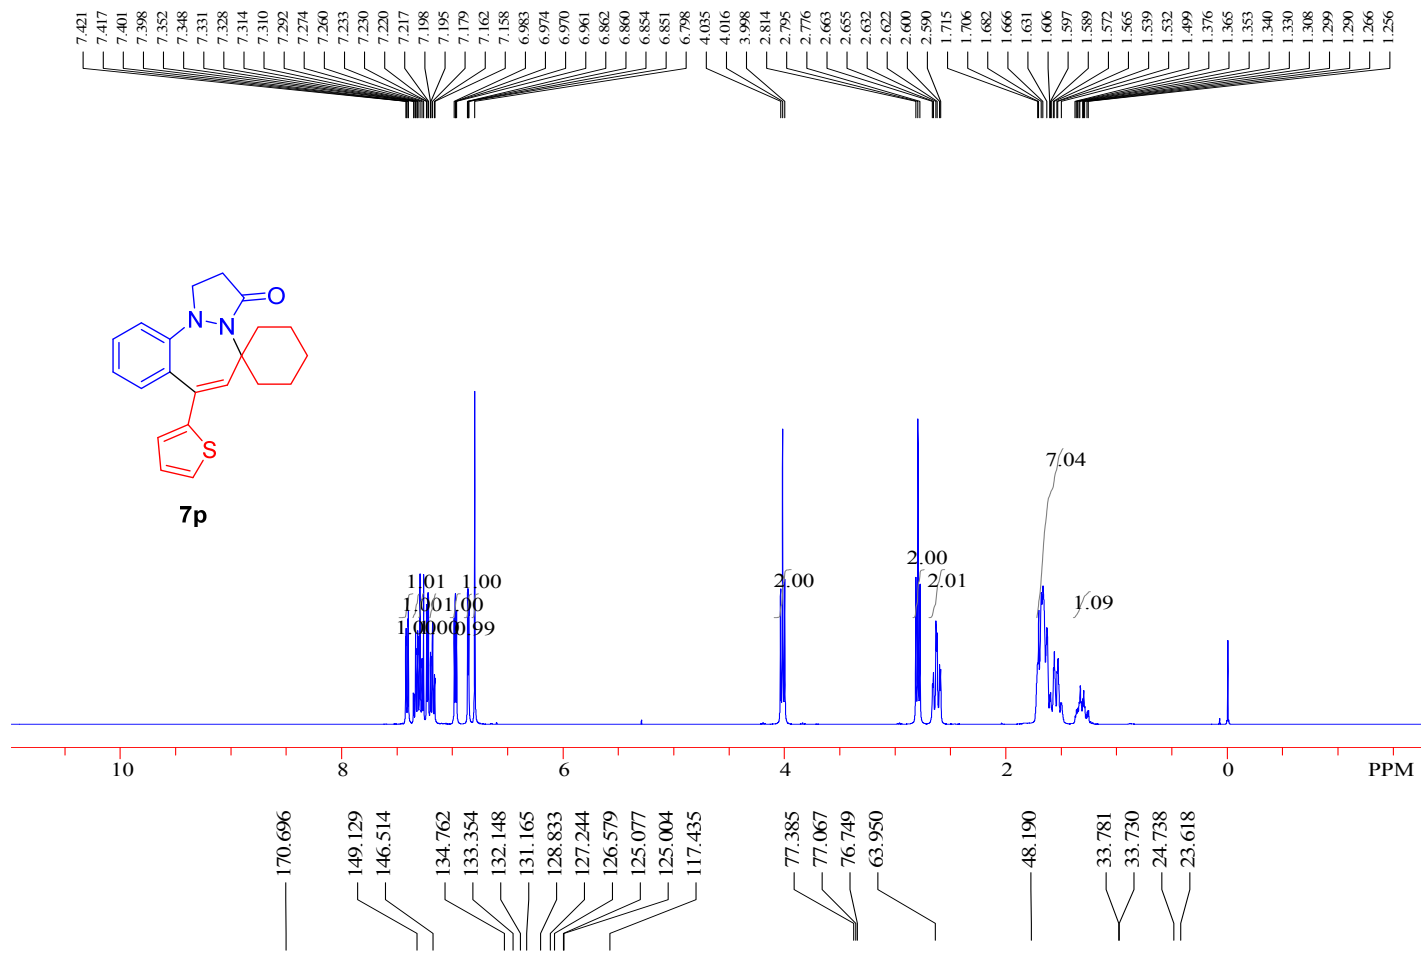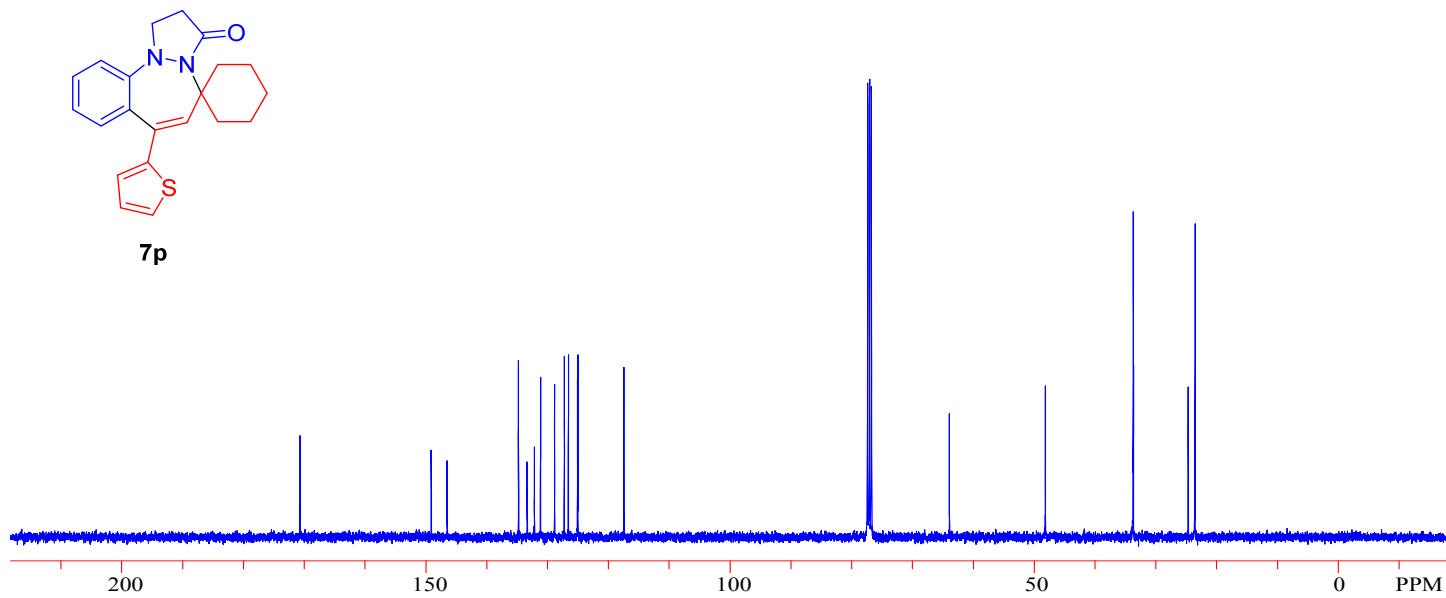



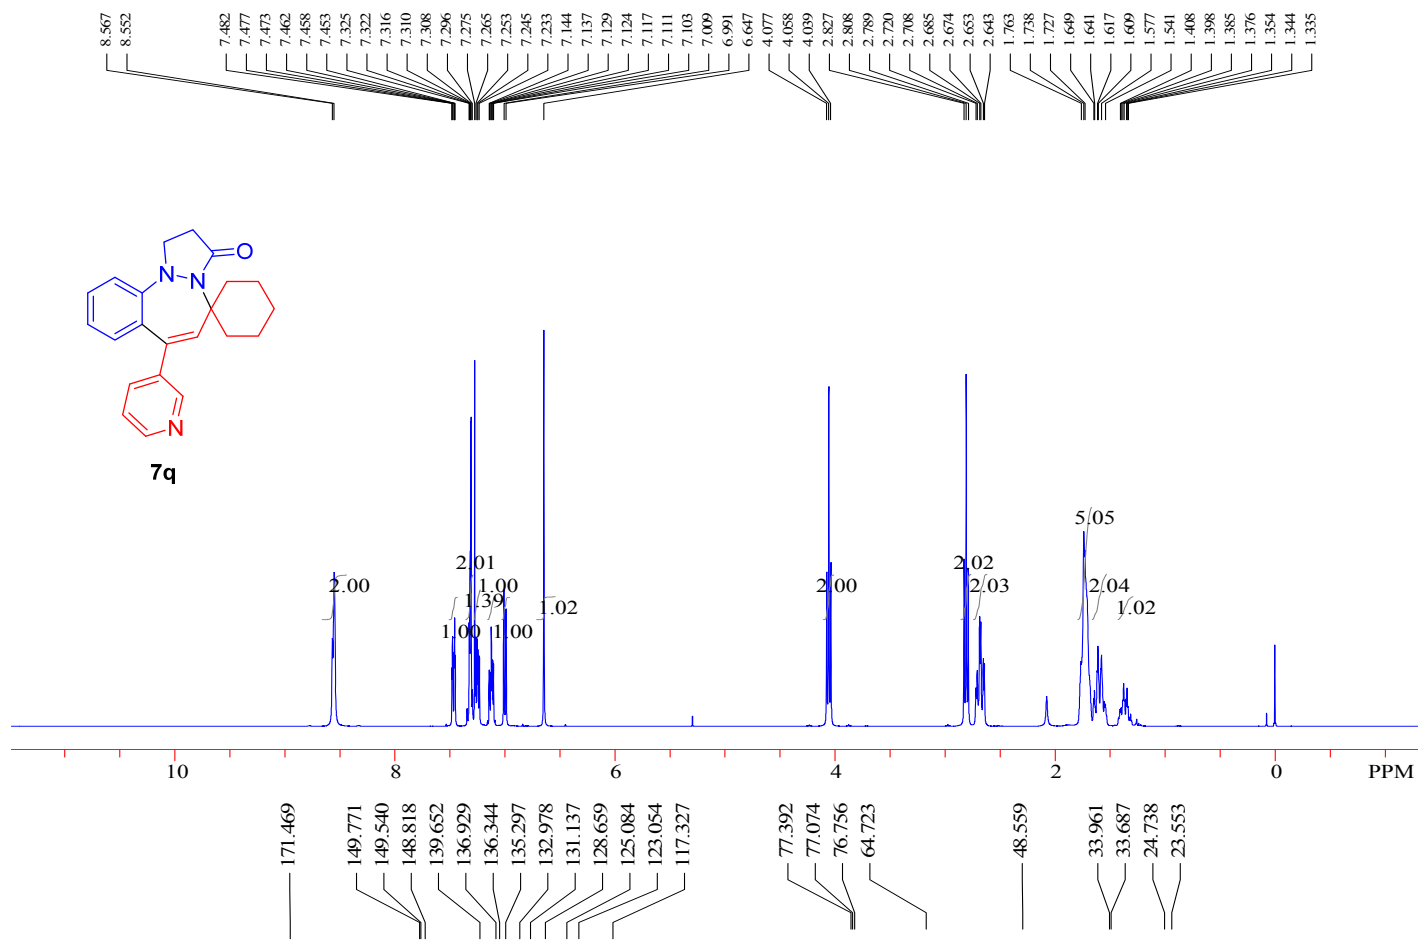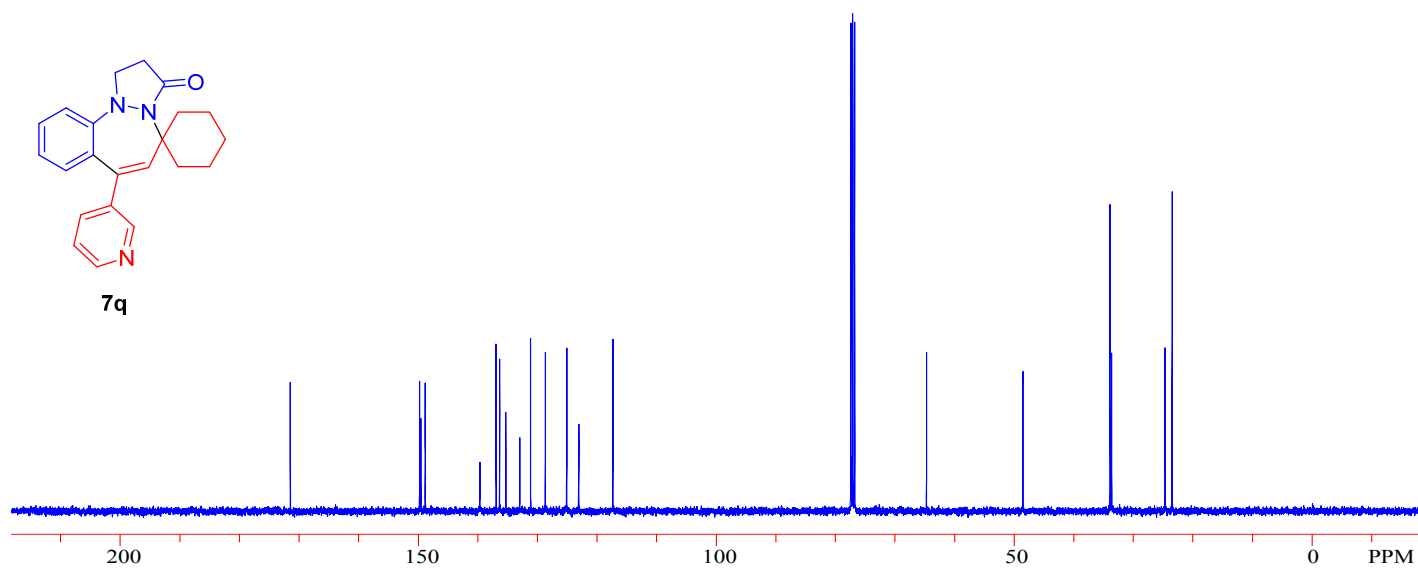

## VII. Copies of NMR spectra of 8 and 9

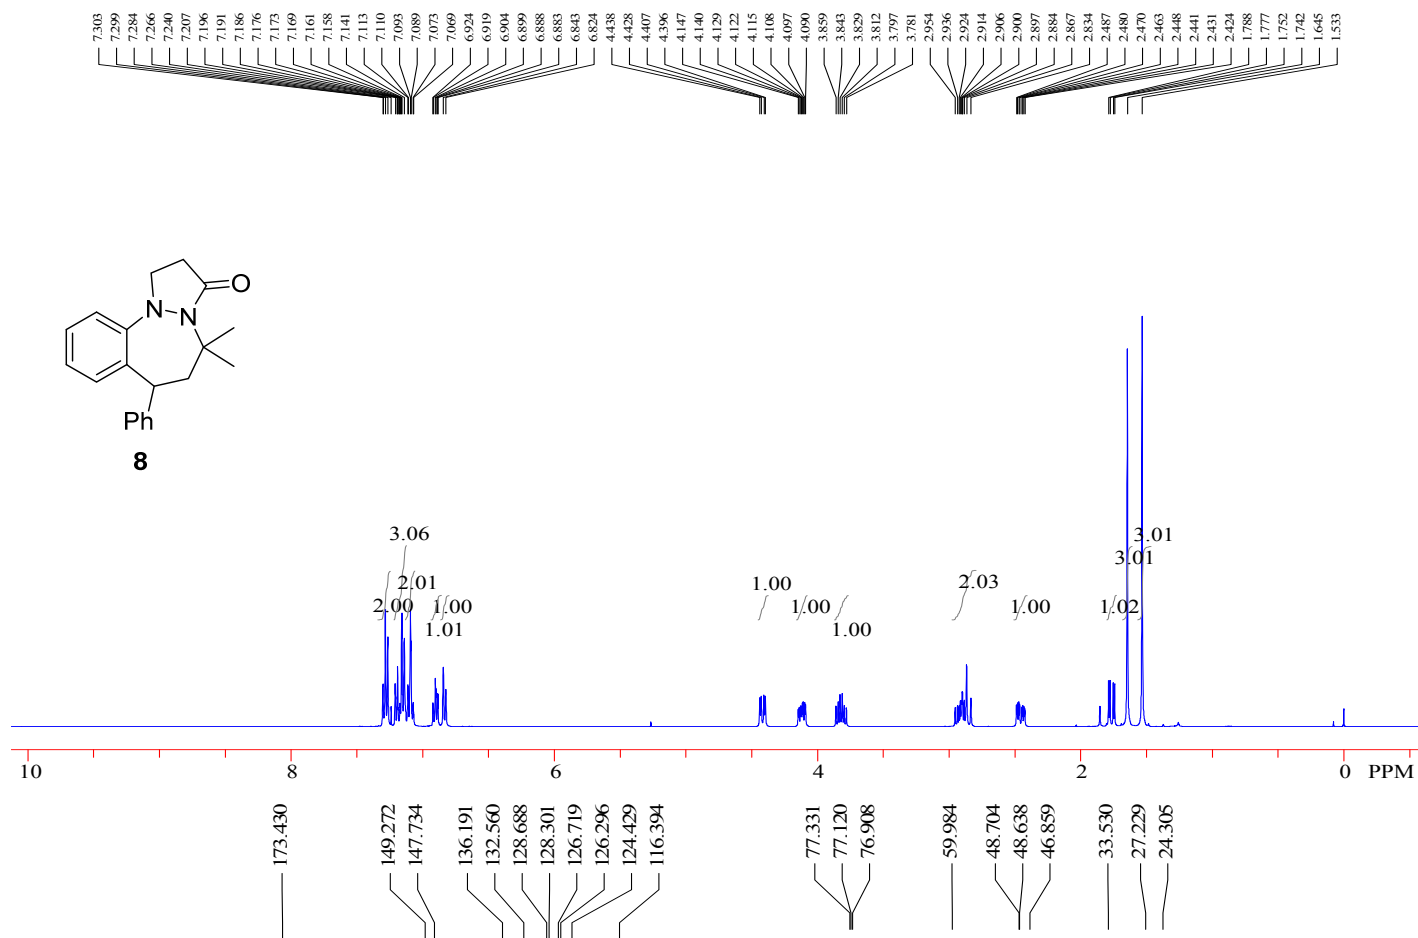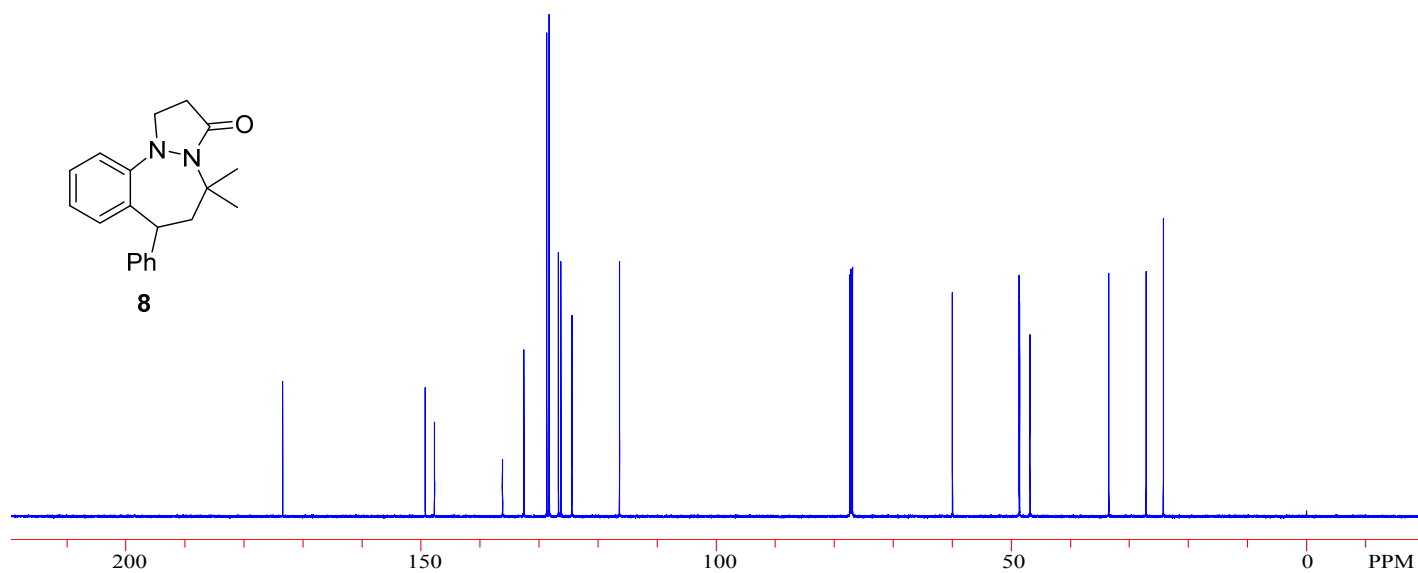

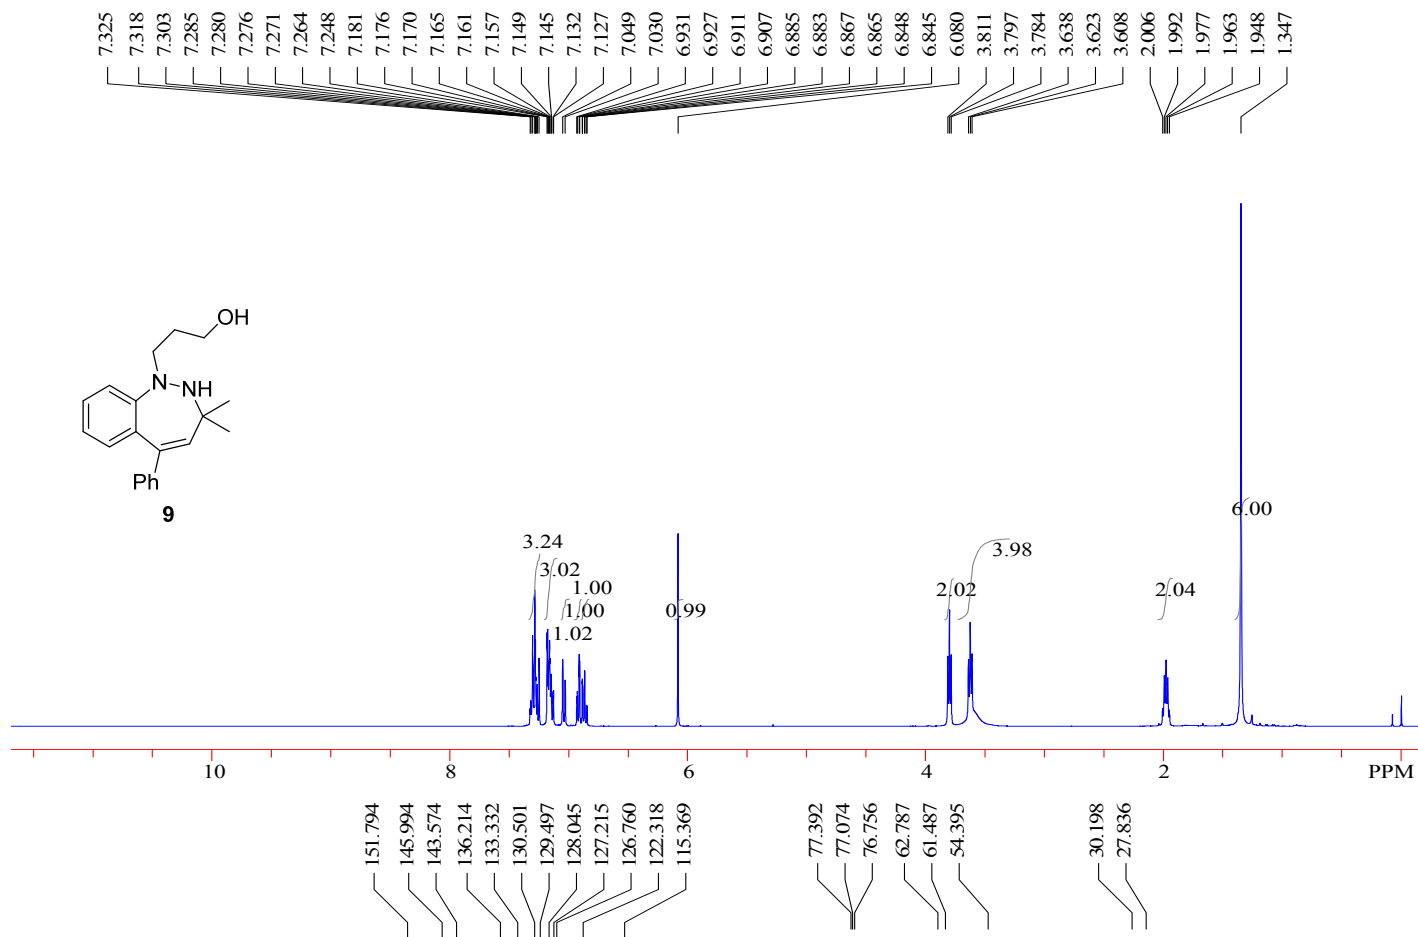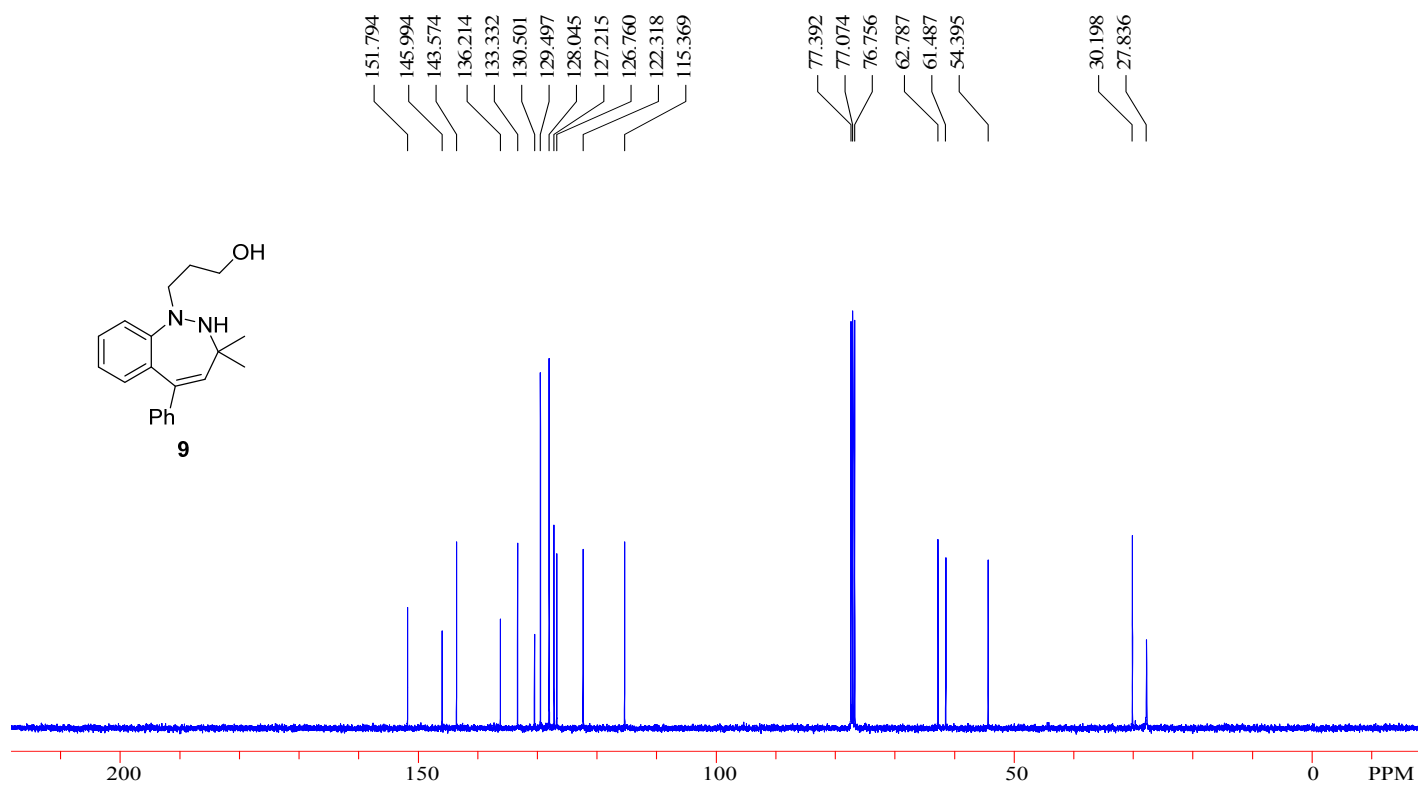

## VIII. X-ray crystal structure and data of **3a**

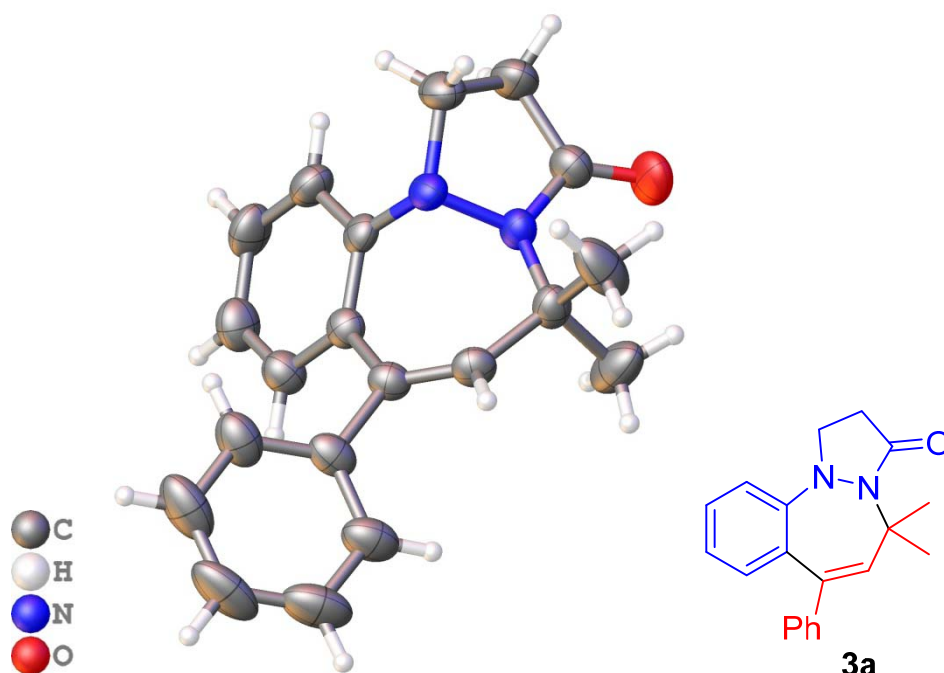

Fig. S1 X-ray structure of **3a** with 50% ellipsoid probability

**X-ray structure determination.** Single crystals suitable for X-ray diffraction were obtained by slow evaporation of the solvent from a petroleum ether/ethyl acetate (3:1) solution of **3a**. Crystal data collection and refinement parameters of **3a** are summarized in Table S1. Intensity data were collected at 299 K on a SuperNova Dual diffractometer using mirror-monochromated CuK $\alpha$  radiation,  $\lambda = 1.54184 \text{ \AA}$ . The data were corrected for decay, Lorentz, and polarization effects as well as absorption and beam corrections based on the multi-scan technique. The structure was solved by a combination of direct methods in SHELXTL and the difference Fourier technique, and refined by full-matrix least-squares procedures. Nonhydrogen atoms were refined with anisotropic displacement parameters. The H-atoms were either located or calculated and subsequently treated with a riding model.

**Table S1** Crystallographic data and structure refinement results of **3a**

|                                                                             |                                                  |
|-----------------------------------------------------------------------------|--------------------------------------------------|
| Empirical formula                                                           | C <sub>20</sub> H <sub>20</sub> N <sub>2</sub> O |
| Formula weight                                                              | 304.38                                           |
| Temp, K                                                                     | 299.04(10)                                       |
| Crystal system                                                              | orthorhombic                                     |
| Space group                                                                 | P2 <sub>1</sub> 2 <sub>1</sub> 2 <sub>1</sub>    |
| <i>a</i> , Å                                                                | 7.01650(10)                                      |
| <i>b</i> , Å                                                                | 12.2287(2)                                       |
| <i>c</i> , Å                                                                | 19.4244(4)                                       |
| $\alpha$ (°)                                                                | 90                                               |
| $\beta$ (°)                                                                 | 90                                               |
| $\gamma$ (°)                                                                | 90                                               |
| Volume, Å <sup>3</sup>                                                      | 1666.67(5)                                       |
| <i>Z</i>                                                                    | 4                                                |
| <i>d</i> <sub>calc</sub> , g cm <sup>-3</sup>                               | 1.213                                            |
| $\lambda$ , Å                                                               | 1.54184                                          |
| $\mu$ , mm <sup>-1</sup>                                                    | 0.591                                            |
| No. of data collected                                                       | 4511                                             |
| No. of unique data                                                          | 2906                                             |
| <i>R</i> <sub>int</sub>                                                     | 0.0155                                           |
| Goodness-of-fit on <i>F</i> <sup>2</sup>                                    | 1.092                                            |
| <i>R</i> <sub>1</sub> , <i>wR</i> <sub>2</sub> ( <i>I</i> > 2σ( <i>I</i> )) | 0.0407, 0.1033                                   |
| <i>R</i> <sub>1</sub> , <i>wR</i> <sub>2</sub> (all data)                   | 0.0435, 0.1058                                   |

## IX. X-ray crystal structure and data of **5a**

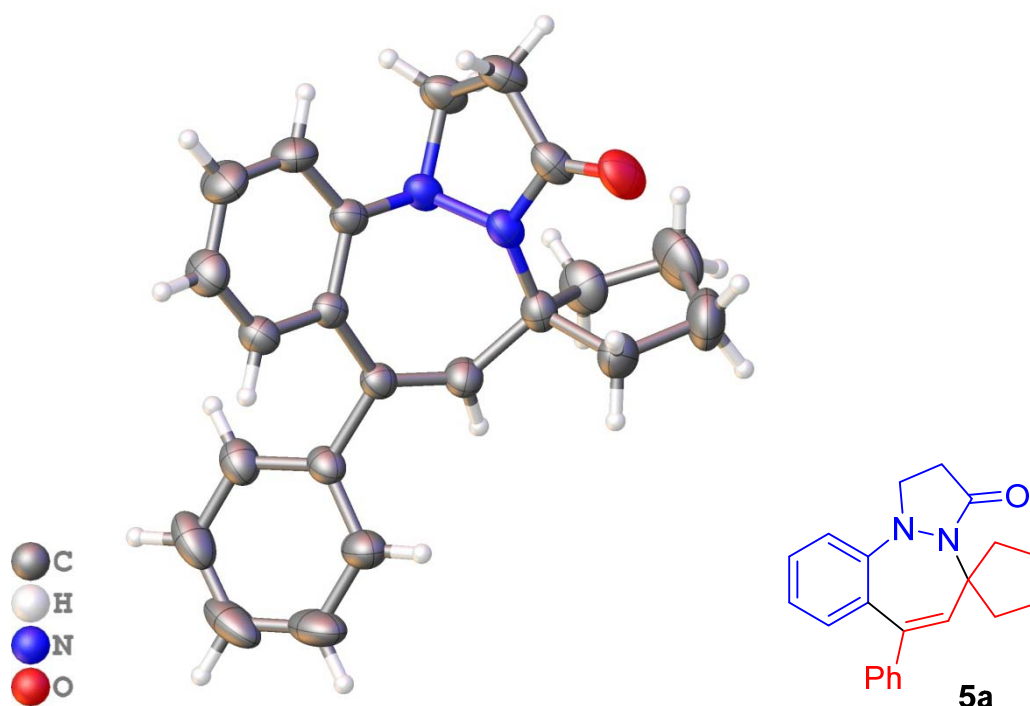

Fig. S2 X-ray structure of **5a** with 50% ellipsoid probability

**X-ray structure determination.** Single crystals suitable for X-ray diffraction were obtained by slow evaporation of the solvent from a petroleum ether/ethyl acetate (1:3) solution of **5a**. Crystal data collection and refinement parameters of **5a** are summarized in Table S2. Intensity data were collected at 283 K on a SuperNova Dual diffractometer using mirror-monochromated MoK $\alpha$  radiation,  $\lambda = 0.71073 \text{ \AA}$ . The data were corrected for decay, Lorentz, and polarization effects as well as absorption and beam corrections based on the multi-scan technique. The structure was solved by a combination of direct methods in SHELXTL and the difference Fourier technique, and refined by full-matrix least-squares procedures. Nonhydrogen atoms were refined with anisotropic displacement parameters. The H-atoms were either located or calculated and subsequently treated with a riding model.

**Table S2** Crystallographic data and structure refinement results of **5a**

|                                                                             |                                                  |
|-----------------------------------------------------------------------------|--------------------------------------------------|
| Empirical formula                                                           | C <sub>22</sub> H <sub>22</sub> N <sub>2</sub> O |
| Formula weight                                                              | 330.41                                           |
| Temp, K                                                                     | 283 (2)                                          |
| Crystal system                                                              | monoclinic                                       |
| Space group                                                                 | P2 <sub>1</sub> /n                               |
| <i>a</i> , Å                                                                | 7.6394(5)                                        |
| <i>b</i> , Å                                                                | 22.9296(11)                                      |
| <i>c</i> , Å                                                                | 10.4410(6)                                       |
| $\alpha$ (°)                                                                | 90                                               |
| $\beta$ (°)                                                                 | 104.958(6)                                       |
| $\gamma$ (°)                                                                | 90                                               |
| Volume, Å <sup>3</sup>                                                      | 1766.96(18)                                      |
| <i>Z</i>                                                                    | 4                                                |
| <i>d</i> <sub>calc</sub> , g cm <sup>-3</sup>                               | 1.242                                            |
| $\lambda$ , Å                                                               | 0.71073                                          |
| $\mu$ , mm <sup>-1</sup>                                                    | 0.077                                            |
| No. of data collected                                                       | 13029                                            |
| No. of unique data                                                          | 4177                                             |
| <i>R</i> <sub>int</sub>                                                     | 0.0397                                           |
| Goodness-of-fit on <i>F</i> <sup>2</sup>                                    | 1.045                                            |
| <i>R</i> <sub>1</sub> , <i>wR</i> <sub>2</sub> ( <i>I</i> > 2σ( <i>I</i> )) | 0.0581, 0.1318                                   |
| <i>R</i> <sub>1</sub> , <i>wR</i> <sub>2</sub> (all data)                   | 0.0815, 0.1467                                   |

## X. References

- (1) C. Yang, F. Song, J. Chen and Y. Huang, *Adv. Synth. Catal.*, 2017, **359**, 3496-3502.
- (2) Z. Zhang, H. Jiang and Y. Huang, *Org. Lett.*, 2014, **16**, 5976-5979.
- (3) P. K. R. Panyam and T. Gandhi, *Adv. Synth. Catal.*, 2017, **359**, 1144-1151.
- (4) K. Feng, Y. Ban, P. Yuan, W. Lei, Q. Liu and R. Fang, *Org. Lett.*, 2019, **21**, 3131-3135.
- (5) K.-i. Fujita, Y. Takahashi, M. Owaki, K. Yamamoto and R. Yamaguchi, *Org. Lett.*, 2004, **6**, 2785-2788.
